# Supplementary material for: Metabolic labeling of RNA using multiple ribonucleoside analogs enables the simultaneous evaluation of RNA synthesis and degradation rates
Source: HighWire-hosted journal article supplement (doi:10.1101/gr.264408.120), 2020-08-25
Supplement: Supplemental_Tables.xlsx [file Supplemental_Tables.xlsx]

## Sheet: Table S1
Table S1: Estimated RNA synthesis and degradation rates
Ensembl gene ID	Symbol	Raw value [cpm]									Normalized value									Parameters						Regression		Statistics				Objective
		0 min	15 min	30 min	45 min	60 min	120 min	240 min	480 min	720 min	0 min	15 min	30 min	45 min	60 min	120 min	240 min	480 min	720 min	ks	kd	t0	a	b1	b2	Coef	StdErr	R2	t-value	p-value	FDR
ENSG00000007202	KIAA0100	0.891223	0.711254	0.849139	1.80414	2.81131	4.64451	6.73617	12.8369	15.6851	17.2223	16.1193	15.6174	14.4004	15.2552	13.2366	10.0327	7.45114	4.08865	0.0377493	0.00187233	30	16.5726	1.05852	0.0180224	0.999999	0.0246854	0.989747	40.5097	2.36918e-18	1.86152e-14	yes
ENSG00000015676	NUDCD3	0.245855	0.817942	1.19651	2.53274	2.91944	5.47225	12.7199	20.5625	23.1603	44.0459	43.7422	42.0447	42.7756	38.307	33.5059	26.9816	10.33	3.44137	0.0750907	0.00277228	21.3999	46.0007	0.318148	0	1.01562	0.0256859	0.989243	39.54	3.56203e-18	1.86152e-14	yes
ENSG00000196588	MKL1	0.368782	5.12103	7.17908	18.319	22.2742	66.6327	133.505	143.196	150.888	93.9725	91.8869	72.0278	69.8739	67.2002	45.0628	12.4657	1.88698	0.967324	1.08236	0.00713248	30	96.7406	1.87582	0	1.0046	0.0264034	0.988393	38.0481	6.8024e-18	2.36996e-14	yes
ENSG00000077684	JADE1	2.7966	8.46393	19.9162	26.8539	39.2502	111.1	206.421	225.29	248.671	325.483	333.818	307.569	284.698	220.356	170.128	50.7648	11.3823	8.96483	1.61312	0.00663437	28.6782	354.765	5.62669	0	1.00319	0.0288834	0.986104	34.7325	3.14556e-17	6.72366e-14	yes
ENSG00000160194	NDUFV3	0.706832	0.78238	0.501764	2.28987	2.81131	4.87444	10.8209	17.7922	21.432	33.0644	35.4103	30.3245	29.5811	28.7725	28.2202	20.1474	8.84218	4.79347	0.0625589	0.00248837	29.149	34.3275	0.687747	0	1.01125	0.0291542	0.986067	34.6864	3.21645e-17	6.72366e-14	yes
ENSG00000204070	SYS1	0.706832	0.604566	1.3895	3.19194	6.59577	11.4963	30.4203	39.9155	53.0182	127.697	110.705	101.101	104.35	89.5761	73.8205	42.8918	11.1888	4.16057	0.223861	0.00445177	30	121.907	0.000269673	0	1.00912	0.0299988	0.985199	33.6385	5.38001e-17	8.129e-14	yes
ENSG00000103111	MON1B	0.522441	1.77814	2.58601	3.5042	6.48764	15.1292	33.0359	42.4517	48.0059	82.271	73.59	58.6577	67.6749	62.5657	47.84	29.3053	3.72557	0.924172	0.221408	0.00454239	30	79.0132	0.967643	0	1.01432	0.0301748	0.985178	33.6147	5.44422e-17	8.129e-14	yes
ENSG00000172466	ZNF24	1.59806	5.97454	10.0739	18.2149	33.0509	70.4495	129.277	136.173	127.555	367.729	304.988	273.319	258.924	258.132	118.323	22.7991	5.64883	4.05988	1.15838	0.00864651	27.762	367.41	2.97527	0	1.00498	0.0303909	0.984692	33.0684	7.16412e-17	9.35993e-14	yes
ENSG00000109670	FBXW7	3.10392	19.8796	36.513	51.6609	68.8411	132.392	162.564	150.649	179.32	350.567	257.246	187.352	181.79	118.18	50.998	9.59529	4.77792	3.18246	2.64144	0.0168264	22.0925	336.603	6.41591	3.19172	0.988654	0.0309638	0.983598	31.9294	1.28848e-16	1.49074e-13	yes
ENSG00000119599	DCAF4	0.368782	0.320064	1.85267	3.19194	5.98305	9.33502	16.7688	17.5972	17.9752	23.0431	20.8533	18.9173	19.3188	18.3449	13.0351	5.71343	0.435456	0.604128	0.11192	0.00585794	11.8514	23.6199	0.368747	0.131125	1	0.0315099	0.983401	31.7361	1.42627e-16	1.49074e-13	yes
ENSG00000178567	EPM2AIP1	9.15809	15.3631	18.2179	29.2132	42.494	71.5991	109.785	112.684	120.555	51.3668	41.7302	32.5718	33.1753	26.5518	23.2705	5.57675	2.69741	1.9742	1.0103	0.00927348	22.7401	45.9966	10	2.30243	0.993332	0.0320079	0.982655	31.0339	2.07363e-16	1.97032e-13	yes
ENSG00000181704	YIPF6	0.307318	1.84926	4.55447	6.2451	8.00142	16.6467	34.3975	48.1483	49.259	126.857	121.9	130.06	127.925	107.366	86.8108	41.0055	9.31392	4.32239	0.227042	0.00442855	29.6008	138.84	2.04666	0	1.01407	0.0328849	0.982436	30.8369	2.30658e-16	2.00903e-13	yes
ENSG00000132780	NASP	20.8669	28.4857	46.2395	84.0313	116.093	183.251	496.47	755.819	840.513	1032.02	864.192	958.123	892.211	717.333	635.873	431.706	230.114	80.5288	3.23945	0.00347037	29.9833	976.764	0.148894	9.99784	0.979728	0.0327255	0.981386	29.9378	3.78186e-16	3.04062e-13	yes
ENSG00000108424	KPNB1	21.7581	26.921	38.9446	58.5652	74.8241	146.601	472.715	759.955	1048.7	846.593	801.561	873.01	797.343	777.895	772.988	583.044	320.363	183.277	2.60943	0.00187585	28.5952	872.622	1.05832	3.21648	1.0188	0.0347735	0.98058	29.2982	5.42345e-16	3.94425e-13	yes
ENSG00000206053	JPT2	3.22684	3.87634	3.78253	7.56351	10.3802	26.9014	72.2347	149.79	198.289	284.738	264.039	256.393	243.412	253.304	238.349	170.392	87.7444	32.9753	0.532743	0.00227031	30	281.886	0	0	1.03702	0.0354863	0.980482	29.2231	5.66051e-16	3.94425e-13	yes
ENSG00000166199	ALKBH3	0.645368	1.06688	2.85619	5.10017	3.85654	8.50728	27.1238	34.531	42.9503	52.507	49.565	41.9878	43.5323	43.1346	33.3715	21.7603	15.1926	10.9318	0.168952	0.00392172	30	43.0735	0.722352	7.44799	1	0.03494	0.979668	28.6205	8.01287e-16	5.2344e-13	yes
ENSG00000171206	TRIM8	1.10635	0.675692	1.65968	2.74091	4.61343	16.6927	30.7786	39.2912	43.9874	110.115	103.959	74.8441	81.0348	90.7106	58.3218	25.5601	4.98355	1.72248	0.242132	0.00551067	30	107.825	1.36154e-07	0	1.00407	0.0357305	0.978926	28.1012	1.08724e-15	6.3063e-13	yes
ENSG00000198142	SOWAHC	0.860491	4.30309	10.5756	13.9821	22.094	42.5364	71.4106	80.1041	80.8452	252.154	237.434	166.557	211.324	156.583	98.5468	13.3131	5.24966	5.77158	0.660984	0.0083895	23.4146	257.767	2.58211	0	1.00397	0.0357311	0.978921	28.0979	1.08941e-15	6.3063e-13	yes
ENSG00000065548	ZC3H15	5.16295	6.22347	7.64225	13.8433	22.7067	42.4444	89.2543	140.387	171.801	615.862	642.593	613.972	671.121	534.608	525.187	395.566	170.3	58.755	0.501149	0.00265003	25.4614	661.665	8.67529	9.33325	1.03805	0.0370574	0.978794	28.012	1.14638e-15	6.3063e-13	yes
ENSG00000110060	PUS3	1.47513	1.60032	2.54742	4.78791	10.164	23.1766	45.5767	73.1589	80.4995	140.599	127.605	132.279	123.29	113.038	74.9852	21.3229	3.81024	3.07458	0.434407	0.00571813	30	147.944	0	0	1.02564	0.0370541	0.978293	27.6795	1.39865e-15	7.02097e-13	yes
ENSG00000151694	ADAM17	0.829759	1.74257	2.27724	2.42865	4.61343	11.4963	19.3844	23.4108	26.0554	33.7845	28.262	29.3858	25.183	29.6897	22.733	13.0397	6.15686	4.2253	0.116675	0.00438653	24.0512	29.8154	1.28615	3.14248	0.999998	0.0361463	0.978271	27.6653	1.41064e-15	7.02097e-13	yes
ENSG00000126953	TIMM8A	1.22927	2.24045	3.08778	6.00224	11.1371	27.8671	59.7298	94.5798	79.5921	232.171	201.739	180.866	200.4	155.304	133.329	65.0894	15.6885	8.06223	0.455392	0.00499238	30	225.414	0.451034	0	1.00202	0.0364183	0.978037	27.5142	1.54532e-15	7.34165e-13	yes
ENSG00000108821	COL1A1	1.72098	2.45383	3.93692	7.59821	12.9032	27.8211	43.3193	54.4692	57.1663	57.5477	52.1923	43.4955	42.0189	43.4243	36.9774	28.5125	13.5112	10.975	0.293179	0.00513578	30	44.7596	3.70505	10	0.97771	0.0358657	0.977635	27.2603	1.80305e-15	8.1937e-13	yes
ENSG00000148296	SURF6	1.01415	1.60032	3.78253	10.3391	12.9392	32.5576	70.049	127.355	119.042	92.5323	75.957	80.7895	74.4613	70.0243	59.1953	22.1703	5.1529	3.73624	0.561701	0.00427799	29.9081	88.8467	0	0	1.03184	0.0383459	0.97706	26.9087	2.23777e-15	9.74549e-13	yes
ENSG00000163882	POLR2H	6.45368	6.18791	6.25275	15.0923	23.4276	57.8955	131.14	230.909	262.282	780.044	760.872	756.007	753.409	756.244	739.303	519.622	252.274	108.826	0.765951	0.00224817	29.9895	819.226	2.18926	9.19181	1.01491	0.0380898	0.976615	26.6451	2.63564e-15	1.07718e-12	yes
ENSG00000167513	CDT1	0.215123	0.320064	1.81407	2.63682	4.21697	10.9905	22.3584	33.5555	41.9565	101.474	76.0991	73.2795	69.4956	72.5106	60.7407	34.3899	9.60422	3.0566	0.169791	0.00408439	30	89.579	2.11986e-07	0	1.00964	0.0379298	0.97657	26.6187	2.67955e-15	1.07718e-12	yes
ENSG00000183741	CBX6	3.4727	4.55203	7.29487	7.77168	11.7138	40.789	140.743	212.727	211.986	237.272	247.328	219.326	214.777	219.825	191.226	134.416	45.9406	19.2062	0.822748	0.0032287	30	241.97	0	9.99545	1.02208	0.0385552	0.976381	26.5096	2.8687e-15	1.09438e-12	yes
ENSG00000167721	TSR1	1.96684	2.52495	4.40008	6.62675	9.26291	14.8992	33.86	61.3364	73.586	84.4313	89.6383	78.3999	75.6436	85.1106	78.7031	52.2683	34.3526	21.4214	0.186341	0.00190476	29.6147	88.2277	2.71205	0	1.00585	0.0379925	0.976321	26.475	2.93176e-15	1.09438e-12	yes
ENSG00000172766	NAA16	0.799028	1.56476	1.89126	3.33072	3.53216	8.82918	14.4398	18.4556	17.3703	27.7237	25.1612	20.1405	15.5827	17.7173	10.9297	8.44713	1.30637	0.985304	0.125908	0.0074859	30	24.8724	1.16752	1.37081	1	0.0378913	0.976174	26.3913	3.09015e-15	1.11373e-12	yes
ENSG00000131381	RBSN	0.399514	0.533441	0.96493	2.1164	2.48693	7.67954	19.5994	23.4499	23.0307	24.9633	26.8891	25.4601	24.0953	20.4207	18.3431	9.37659	1.36685	1.03924	0.118243	0.00459698	30	28.0378	0.386342	0	1.00326	0.0381685	0.975985	26.285	3.30443e-15	1.12322e-12	yes
ENSG00000110066	KMT5B	1.13708	2.27601	5.63519	7.45943	11.8219	15.9109	42.8894	55.1716	59.8453	194.846	148.056	150.456	146.794	155.811	104.37	76.1062	22.0631	8.41464	0.251087	0.00397114	20.8312	178.098	1.70536	0	1.00403	0.0382167	0.975962	26.2721	3.3314e-15	1.12322e-12	yes
ENSG00000093167	LRRFIP2	2.64294	3.6274	3.51235	2.42865	6.95619	14.0255	35.2216	49.7871	47.9627	48.1264	46.1565	41.2482	43.9106	42.8691	34.7377	26.7082	6.9552	1.67214	0.189697	0.00340656	30	49.6251	2.30895	0	1.00743	0.039246	0.97485	25.6697	4.89663e-15	1.59936e-12	yes
ENSG00000116954	RRAGC	0.768296	0.817942	1.19651	2.70621	4.25301	10.0248	26.5147	39.1351	34.7405	217.109	198.781	191.022	199.052	185.356	149.59	62.0003	7.51162	1.81598	0.183858	0.00460072	30	226.566	0.0203508	0	1.01913	0.0398186	0.974705	25.5943	5.14184e-15	1.62856e-12	yes
ENSG00000176022	B3GALT6	1.10635	0.853505	3.08778	5.5859	9.73146	17.2445	37.0131	44.2855	39.58	81.7309	87.508	78.3715	79.4979	67.6347	55.231	20.4754	3.06029	1.12195	0.234209	0.00521032	20.1371	91.6131	0.979931	0	1.01263	0.0397658	0.974454	25.4649	5.5929e-15	1.68169e-12	yes
ENSG00000214046	SMIM7	9.12735	10.1709	22.7724	26.8886	40.2234	81.8078	249.597	397.126	554.768	503.467	514.231	439.876	498.221	488.312	444.021	355.791	182.746	90.8386	1.40998	0.00200821	30	513.074	3.18903	9.85248	1.02773	0.0403753	0.974433	25.4543	5.63138e-15	1.68169e-12	yes
ENSG00000165724	ZMYND19	0.768296	1.13801	1.4281	3.12255	5.65866	17.1525	41.9936	53.3767	67.4502	65.1087	66.7257	52.7123	65.6176	55.9277	42.9798	18.0698	4.47552	1.21185	0.292763	0.00441322	30	68.9707	0	0	1.03075	0.0405911	0.974314	25.3934	5.85963e-15	1.68339e-12	yes
ENSG00000180035	ZNF48	0.430246	0.462315	1.46669	2.91438	7.85725	14.8533	23.8274	20.9137	19.9196	41.4655	38.227	26.7971	20.5484	23.1966	4.79296	1.23016	1.30637	1.14353	0.303492	0.0143175	30	42.8362	0.364769	0.410242	1	0.0394203	0.974263	25.3677	5.95918e-15	1.68339e-12	yes
ENSG00000130844	ZNF331	5.62393	10.0998	4.40008	16.7924	21.9859	58.7232	72.9513	81.6258	86.8945	58.2678	60.7135	42.8412	47.5285	40.4794	12.8559	2.97973	2.35872	0.765948	0.789851	0.01004	30	64.3135	6.14607	0	1.00062	0.0396798	0.973963	25.2174	6.57619e-15	1.8088e-12	yes
ENSG00000125351	UPF3B	0.645368	0.284502	0.810541	1.07555	1.83816	3.49488	8.77852	15.9194	20.4381	69.5493	62.3941	59.1413	61.1958	50.1346	51.0204	46.7463	26.0427	13.5569	0.051692	0.00191218	29.6949	64.7426	0.256826	0	1.00688	0.040382	0.973383	24.9338	7.93211e-15	2.12581e-12	yes
ENSG00000112561	TFEB	2.58147	2.80945	7.68085	4.96139	10.6325	23.4525	35.974	50.5674	46.58	69.5493	61.3053	45.2876	56.6322	47.8174	38.5676	11.8643	0.254016	0.963728	0.283331	0.00600676	24.958	67.1148	2.69546	0	1.01214	0.0409087	0.972979	24.7413	9.01882e-15	2.35662e-12	yes
ENSG00000142961	MOB3C	0.276586	0.106688	0.347375	3.53889	4.32509	7.03575	16.3388	16.7388	16.2036	13.1418	12.7108	10.6676	11.2791	10.6449	5.10652	2.29631	0.834624	0.118668	0.129557	0.00764201	28.0366	13.7579	0.387155	0.367719	1.00204	0.0406067	0.972841	24.6767	9.418e-15	2.4009e-12	yes
ENSG00000100596	SPTLC2	1.69025	3.98302	5.36501	6.00224	6.84807	17.7043	55.6809	82.7964	106.296	38.8252	34.9843	37.0095	34.1921	38.838	32.9012	22.6077	9.27763	4.77549	0.302266	0.00231003	27.8344	39.4003	0.281209	0	1.03619	0.0421005	0.972702	24.6122	9.8351e-15	2.44753e-12	yes
ENSG00000168495	POLR3D	1.29074	1.31582	1.62108	2.56743	4.79365	11.8182	25.5115	26.8835	28.2159	63.4885	56.3109	58.4301	54.4331	56.8933	40.9417	15.4454	3.51994	1.70091	0.146523	0.00490772	30	66.4029	1.39189	0	1.01008	0.0414136	0.972217	24.3901	1.1428e-14	2.7778e-12	yes
ENSG00000075218	GTSE1	0.215123	0.39119	1.11932	0.936765	1.65795	7.44962	17.5929	23.9961	28.7344	397.133	292.68	276.505	262.21	290.646	206.299	125.668	18.9302	4.29722	0.133709	0.00479702	30	351.594	0	0	1.02096	0.0420541	0.971965	24.2772	1.23401e-14	2.93133e-12	yes
ENSG00000132286	TIMM10B	0.430246	2.16933	3.12637	7.39004	11.1732	27.0853	65.2119	86.8542	94.6722	192.146	145.949	135.009	130.384	148.352	118.368	48.2771	14.3821	7.20638	0.450384	0.00456536	30	173.434	0.494682	0	1.00606	0.0415978	0.971758	24.1855	1.31374e-14	3.05138e-12	yes
ENSG00000053254	FOXN3	0.553173	2.80945	8.95455	10.1656	11.4975	24.6941	62.1305	80.9235	80.0674	194.426	171.489	168.236	181.861	171.114	145.11	73.8646	20.418	7.56239	0.351218	0.00407889	29.6152	191.215	4.73626	8.349	1.03468	0.0428482	0.971672	24.1475	1.34836e-14	3.0637e-12	yes
ENSG00000064393	HIPK2	1.78245	3.44958	7.60365	10.9636	17.4085	28.143	76.2836	94.0726	80.1538	22.203	18.5336	19.344	14.093	15.4483	10.213	5.74077	1.12493	0.183396	0.552146	0.00628164	30	21.2345	2.78495	0.244455	0.999991	0.0417728	0.97119	23.9388	1.55656e-14	3.46153e-12	yes
ENSG00000171316	CHD7	0.122927	1.38695	3.20357	5.51651	7.10036	14.6693	26.9089	29.3026	27.5677	19.7426	14.7937	16.5562	14.6132	12.1414	6.67431	6.4242	1.29427	0.945748	0.228872	0.00798706	23.0299	17.4671	0.754877	1.52992	1	0.0419493	0.970953	23.8383	1.66865e-14	3.63349e-12	yes
ENSG00000161813	LARP4	3.62636	9.67306	14.0494	25.6049	28.834	87.1421	196.352	236.372	260.64	369.349	385.963	410.803	351.143	327.529	313.177	155.356	20.5269	8.22046	1.14009	0.00398119	22.1349	418.849	1.34138	0	1.01554	0.0427408	0.970768	23.7604	1.76151e-14	3.75741e-12	yes
ENSG00000147383	NSDHL	1.3522	1.13801	2.39303	2.01231	4.90177	9.74888	30.8861	53.4157	55.1355	133.698	134.091	114.983	123.952	118.88	114.695	69.928	24.2162	13.9884	0.208944	0.00331549	29.9678	129.007	0.00174517	9.99999	1.02976	0.0434229	0.970659	23.7147	1.8184e-14	3.80118e-12	yes
ENSG00000149636	DSN1	10.4488	19.5595	20.6495	23.5926	35.3216	90.591	213.372	329.117	351.942	756.401	588.436	704.205	646.127	545.639	533.721	277.881	33.9293	11.2375	1.554	0.00417063	29.9988	729.59	0.113654	9.84041	1.01475	0.0428699	0.970552	23.6705	1.8753e-14	3.84326e-12	yes
ENSG00000100614	PPM1A	0.645368	0.462315	1.50529	2.67152	3.49612	9.33502	22.7525	28.132	30.8517	41.8856	44.5943	39.5698	31.993	32.4173	34.1778	15.9101	2.96352	0.571764	0.137087	0.00415864	29.8521	44.0741	0.603545	0	1.01574	0.0430026	0.970431	23.6205	1.94204e-14	3.90351e-12	yes
ENSG00000109814	UGDH	2.30489	1.38695	3.47375	4.05932	6.27139	13.3817	38.3389	77.3338	87.7587	151.82	166.66	166.273	146.061	165.176	143.027	117.631	71.7777	42.4616	0.233288	0.00187479	30	158.705	0.0948122	10	1.01037	0.0428361	0.970349	23.587	1.98817e-14	3.92083e-12	yes
ENSG00000163686	ABHD6	0.553173	0.284502	1.23511	1.31841	2.23463	4.32262	10.3909	23.645	25.148	15.4821	15.5275	14.1666	15.5591	12.069	11.6016	7.87306	2.05632	1.60382	0.0821849	0.0027717	30	15.6908	0	0	1.05065	0.0446064	0.970268	23.5538	2.03488e-14	3.93862e-12	yes
ENSG00000004399	PLXND1	6.14637	9.13962	6.29135	16.9312	22.7788	49.1583	60.7689	102.579	121.721	216.209	176.128	170.938	155.803	163.511	130.53	36.0028	8.68493	3.99156	0.566286	0.00529535	28.4959	206.59	6.02826	0	1.01544	0.0431924	0.97016	23.5096	2.09907e-14	3.98899e-12	yes
ENSG00000172775	FAM192A	1.10635	0.320064	1.4281	3.19194	4.86573	12.0941	24.544	45.1439	58.8515	69.9693	77.1405	71.5158	67.2019	53.4174	56.0149	43.9852	27.095	14.9486	0.178185	0.00272601	30	63.0626	0	9.9049	1.02209	0.0436898	0.969874	23.3943	2.27658e-14	4.24907e-12	yes
ENSG00000136280	CCM2	4.94782	4.72984	11.0774	14.0862	22.959	37.9839	93.8048	124.077	125.783	132.318	122.09	104.941	100.637	94.1141	99.2411	60.2781	9.22925	1.98859	0.529778	0.00388378	29.9174	127.965	6.729	0	1.0118	0.0433218	0.969777	23.3555	2.33983e-14	4.26841e-12	yes
ENSG00000070444	MNT	0.706832	0.960193	1.3895	2.28987	4.14488	7.35765	10.6059	9.55943	9.16044	14.762	11.5036	12.3176	10.9954	8.08623	5.86801	1.83158	0.471744	0.05394	0.0889476	0.00939503	19.8314	14.4021	0.833513	0.459023	1	0.0428481	0.969733	23.3383	2.36862e-14	4.26841e-12	yes
ENSG00000115216	NRBP1	19.0845	21.9778	20.8425	24.3559	36.3308	55.7342	101.473	167.036	236.702	297.04	273.815	264.642	293.541	255.839	239.2	197.072	92.0989	32.72	0.60499	0.00234585	14.0848	288.623	8.44455	10	1.02419	0.0440197	0.969552	23.2666	2.49205e-14	4.40822e-12	yes
ENSG00000162086	ZNF75A	0.184391	0.497878	0.771944	1.31841	2.05442	3.81678	4.72965	5.85271	6.04934	21.0028	12.4268	11.9762	10.7826	9.67934	4.52419	1.31218	0.495936	0.496248	0.0712738	0.0137639	29.58	18.1961	0.395306	0.634743	0.999946	0.0431098	0.969371	23.1953	2.62146e-14	4.40822e-12	yes
ENSG00000055070	SZRD1	3.34977	2.88058	7.41066	11.831	17.1562	42.5824	71.3748	144.952	181.956	193.526	191.467	186.129	205.129	191.994	183.431	139.009	79.6522	32.3208	0.465291	0.00202685	8.30474	197.377	0.00883649	9.99707	1.05144	0.0453632	0.969327	23.1784	2.65331e-14	4.40822e-12	yes
ENSG00000167397	VKORC1	8.91223	7.29036	9.45632	7.6329	11.1732	29.2007	56.8633	131.101	165.795	678.27	713.485	687.763	772.349	676.854	606.578	543.788	347.349	254.809	0.380378	0.00147231	29.8915	724.961	0.00651614	9.98916	0.988457	0.0426642	0.969301	23.1683	2.67237e-14	4.40822e-12	yes
ENSG00000153037	SRP19	2.98099	4.05415	11.502	11.7269	25.0135	58.9531	140.922	262.904	270.492	324.043	289.555	317.099	256.228	298.515	252.437	132.502	30.119	12.7155	1.08709	0.00367618	29.9836	321.195	0.0220495	9.99751	1.04295	0.0450319	0.969281	23.1604	2.68755e-14	4.40822e-12	yes
ENSG00000198740	ZNF652	0.0614637	0.746817	1.23511	1.80414	2.27067	6.02407	8.74269	11.2372	11.2777	14.3419	12.1664	15.5036	10.8535	9.75175	6.09198	1.33951	0.447552	0.604128	0.0795366	0.00733151	27.963	15.2317	0.507831	0	1.00314	0.043324	0.969265	23.1543	2.69925e-14	4.40822e-12	yes
ENSG00000104442	ARMC1	3.81075	5.47666	5.558	8.60436	14.9937	32.5576	70.6582	122.907	129.283	448.56	402.508	469.375	427.212	393.763	367.602	235.754	41.8401	7.96154	0.504254	0.00347523	29.851	469.004	0.033399	9.39447	1.0198	0.0442371	0.969003	23.053	2.90162e-14	4.6658e-12	yes
ENSG00000084234	APLP2	2.08976	1.77814	2.23864	3.5042	6.59577	12.1861	27.3388	37.5354	51.2466	135.378	134.28	123.716	127.405	133.507	120.72	115.28	75.9629	49.668	0.108928	0.00135038	27.7741	127.918	2.65749	9.59638	1.01208	0.0439543	0.968932	23.0258	2.95888e-14	4.68579e-12	yes
ENSG00000100296	THOC5	5.47027	5.15659	8.14401	10.6167	9.73146	25.3839	27.8046	44.8318	44.0306	59.4679	60.0745	62.0145	60.0845	54.9864	42.0616	35.5381	20.0552	13.0643	0.149676	0.00334537	29.6468	55.3312	7.0603	8.57748	0.990424	0.0430877	0.968828	22.9863	3.04391e-14	4.74849e-12	yes
ENSG00000126062	TMEM115	0.0614637	0.213376	0.501764	0.90207	2.05442	5.88612	12.7916	15.3731	13.8703	18.7225	19.4804	14.6218	18.0419	14.9414	10.3474	2.46033	1.2096	0.262508	0.0967291	0.0062497	30	20.3361	0	0	1.0054	0.0437901	0.968758	22.9594	3.10312e-14	4.76968e-12	yes
ENSG00000123395	ATG101	1.07561	0.746817	2.8176	5.20425	5.69471	17.0605	20.101	32.346	29.0369	203.967	183.419	151.793	164.08	170.752	126.969	47.375	7.10035	2.93074	0.153509	0.00503942	29.4463	202.5	2.16874	0	1.01523	0.0442736	0.968682	22.9308	3.16775e-14	4.79846e-12	yes
ENSG00000244045	TMEM199	0.430246	0.604566	1.4281	1.87353	3.13569	6.71385	13.8307	16.9338	20.1789	29.944	24.3328	20.7663	23.244	24.0414	20.4933	13.6685	6.6528	3.08896	0.0711072	0.00326338	29.8156	25.8392	1.04199	1.29672	1	0.0437155	0.968535	22.8753	3.29686e-14	4.92268e-12	yes
ENSG00000240230	COX19	0.768296	1.28026	2.85619	4.64913	7.3887	15.1751	31.1369	39.5643	53.4935	61.3282	47.3637	52.7976	41.0495	42.6518	29.2057	18.9992	12.471	6.81442	0.236902	0.00487384	29.5327	50.6625	0.814373	4.69839	0.999877	0.0438612	0.968323	22.7964	3.49017e-14	5.13792e-12	yes
ENSG00000067082	KLF6	0.737564	12.9448	20.1477	25.1192	30.6	33.9371	41.1695	32.6191	30.8517	167.182	107.13	84.6583	38.2592	23.8483	3.40434	3.55381	0.6048	0.841464	0.99831	0.0290848	0.145056	168.596	0.736967	0.129191	0.999999	0.043996	0.968142	22.7293	3.66393e-14	5.3188e-12	yes
ENSG00000103978	TMEM87A	2.18196	8.64174	14.5511	24.8763	30.9244	67.1385	119.782	122.673	138.314	913.922	770.34	726.963	678.404	671.519	602.031	402.947	113.521	44.1445	0.534777	0.0035779	9.97875	847.673	10	0	1.0175	0.0450106	0.967805	22.6058	4.00811e-14	5.73874e-12	yes
ENSG00000197283	SYNGAP1	0.307318	1.06688	0.887736	2.46335	3.89258	8.78319	10.4626	11.1592	12.3579	23.1031	27.4335	20.6525	19.8626	15.7138	5.89041	1.01147	0.229824	0.517824	0.110703	0.00990561	30	27.4428	0.93128	0	1.00678	0.0447833	0.967458	22.4812	4.39051e-14	6.20129e-12	yes
ENSG00000167625	ZNF526	0.153659	0.284502	1.15792	1.45719	2.48693	7.03575	10.5342	11.3933	11.537	38.5851	25.7056	24.0377	22.0617	11.4656	3.47153	1.53087	0.072576	0.147436	0.173677	0.0162335	30	37.2748	0	0	1.00677	0.0448512	0.967362	22.4468	4.50264e-14	6.27488e-12	yes
ENSG00000170260	ZNF212	0.153659	0.78238	0.849139	2.70621	3.20778	10.1168	19.1336	15.3731	18.3209	26.2235	26.4157	22.3024	20.17	15.9794	5.33049	2.29631	0.556416	0.021576	0.1824	0.0102821	30	28.9215	0.189876	0	1.00395	0.0448746	0.967151	22.3724	4.75558e-14	6.54017e-12	yes
ENSG00000183665	TRMT12	0.0921955	0.604566	0.347375	3.29603	4.7576	12.508	23.5766	33.5555	29.8578	79.9907	79.7916	56.1259	66.9891	64.014	31.2662	2.70636	1.00397	0.30566	0.238997	0.00776069	30	84.6864	0	0	1.02553	0.0460067	0.966918	22.2909	5.0505e-14	6.85557e-12	yes
ENSG00000169217	CD2BP2	1.78245	2.6672	1.65968	4.1981	4.03675	11.1744	30.4203	37.7305	41.1788	99.6733	93.3782	68.8133	70.4178	70.4347	61.2558	44.7233	13.6443	4.17496	0.166536	0.00371896	29.1003	91.2377	1.37046	0.0609202	1.0025	0.0450978	0.966741	22.2294	5.2855e-14	7.01066e-12	yes
ENSG00000123130	ACOT9	11.4322	11.629	14.9371	21.9272	31.0686	33.7072	45.6483	73.5101	92.5118	195.206	173.88	159.531	171.859	177.366	153.218	120.802	84.6236	65.3321	0.202912	0.0017631	17.3471	174.079	10	9.91287	0.947207	0.0426172	0.966731	22.2259	5.29891e-14	7.01066e-12	yes
ENSG00000224051	CPTP	0.153659	0.106688	0.154389	0.451035	1.91025	3.90875	8.92185	10.9251	12.4444	14.702	14.8648	10.184	13.1945	8.54485	8.64524	3.52647	0.217728	0	0.0686781	0.00560147	30	14.6419	0	0	1.02235	0.0460755	0.966623	22.1886	5.44749e-14	7.07021e-12	yes
ENSG00000185650	ZFP36L1	17.2098	71.9789	163.768	224.72	304.847	372.021	432.477	399.428	373.936	981.611	907.034	775.152	400.823	233.97	57.2915	12.9031	5.21338	4.71436	7.7094	0.0192564	4.43934	1084.24	10	0	1.00089	0.0451241	0.9666	22.1808	5.47921e-14	7.07021e-12	yes
ENSG00000006831	ADIPOR2	0.583905	1.35138	4.43868	5.34303	7.10036	19.9576	48.479	70.7008	76.3946	184.885	146.423	167.069	159.681	152.045	149.209	77.0903	9.28973	3.5996	0.305856	0.00362664	29.4056	183.41	0.73338	0	1.02791	0.0464072	0.96651	22.1499	5.60653e-14	7.14627e-12	yes
ENSG00000164615	CAMLG	1.62879	1.88482	2.8176	2.67152	6.73994	14.4394	47.4399	84.7863	105.95	482.884	398.461	413.335	408.272	415.608	323.681	154.536	46.4124	21.5616	0.406254	0.00404317	30	476.273	0	0	1.03357	0.0467267	0.966421	22.1195	5.73464e-14	7.19551e-12	yes
ENSG00000181915	ADO	0.460977	0.426753	1.96846	3.33072	5.55054	10.9445	22.2509	25.4788	19.3147	36.9649	28.3093	30.4952	27.1456	21.9414	12.3407	1.31218	0.858816	1.01407	0.200787	0.00895727	30	36.8442	0.648158	0	1.00236	0.0453388	0.966388	22.1083	5.78284e-14	7.19551e-12	yes
ENSG00000184216	IRAK1	4.21026	4.16084	3.93692	4.892	9.83959	21.6591	79.6875	153.302	251.35	127.817	126.35	119.421	132.37	115.235	119.219	94.34	65.8022	54.1018	0.471526	0.00103752	30	126.725	0	0	1.08556	0.0491718	0.966296	22.0769	5.91944e-14	7.27882e-12	yes
ENSG00000187531	SIRT7	0.368782	0.426753	0.656153	1.94292	2.34276	7.12772	12.1108	16.6997	15.8579	54.8473	46.7719	33.8235	47.1265	38.3794	30.5495	18.2338	2.27405	1.10397	0.0819299	0.00474015	29.7587	51.0353	0.578735	0	1.00812	0.0457219	0.966213	22.0489	6.04441e-14	7.33945e-12	yes
ENSG00000162063	CCNF	0.860491	1.13801	4.47728	5.27364	7.20849	35.6386	112.15	147.722	146.999	201.387	211.515	168.748	208.038	158.345	108.401	44.2313	6.41088	3.70388	0.827432	0.00543029	30	218.374	0	0	1.03996	0.0471965	0.966171	22.0346	6.10918e-14	7.33945e-12	yes
ENSG00000175029	CTBP2	1.26001	2.56052	6.25275	8.29211	11.3534	15.3131	57.0067	86.347	86.9809	571.696	456.003	443.517	390.75	452.225	364.646	211.971	42.1183	10.414	0.39503	0.00421401	29.0629	518.41	0.224488	9.9531	1.01585	0.0462051	0.966025	21.9857	6.3367e-14	7.49634e-12	yes
ENSG00000131236	CAP1	9.89565	12.8026	21.0355	27.4438	33.4113	58.9991	116.772	222.091	314.782	1399.75	1381.52	1389.75	1344.11	1429.57	1381.72	1167.43	797.078	483.029	0.673925	0.00129312	29.8991	1459.7	0.0510563	9.98326	0.980227	0.0446046	0.965996	21.9759	6.38322e-14	7.49634e-12	yes
ENSG00000113845	TIMMDC1	7.03759	7.07698	5.5194	5.51651	9.87563	15.773	27.2672	40.4227	49.9935	165.682	142.044	142.377	163.228	162.063	140.72	111.808	75.2492	49.0458	0.110029	0.00173444	29.9662	153.237	6.27131	9.99967	1.00782	0.045951	0.965866	21.9324	6.5948e-14	7.65876e-12	yes
ENSG00000185163	DDX51	0.460977	0.640129	0.810541	0.90207	2.41484	6.254	14.1531	23.3718	27.1788	34.5046	25.2796	28.4186	30.8817	25.007	26.1373	15.5274	7.71725	3.03862	0.0888298	0.00280389	30	31.737	0.14969	0	1.0122	0.0462034	0.965791	21.9075	6.71933e-14	7.71764e-12	yes
ENSG00000183309	ZNF623	0.184391	0.106688	0.463167	0.936765	2.77527	7.17371	10.0684	9.32532	7.82094	18.7825	15.8589	12.5736	11.6811	10.1862	0.582322	0.792773	0.012096	0.133052	0.129425	0.0140159	30	19.528	0.0129876	0	1.00662	0.0460874	0.965591	21.8415	7.06128e-14	7.80906e-12	yes
ENSG00000144224	UBXN4	0.553173	0.817942	0.617555	0.936765	2.8834	5.19634	13.7948	15.139	17.8888	95.8928	88.3838	85.3694	76.684	91.483	74.7836	47.0196	14.3459	5.95138	0.0639223	0.00317492	29.4408	97.0209	0.767796	0	1.01756	0.0465893	0.965589	21.8411	7.0635e-14	7.80906e-12	yes
ENSG00000167378	IRGQ	0.522441	0.533441	1.04212	2.35926	3.49612	9.79487	24.5082	27.7809	29.685	18.1224	19.1254	12.4313	13.4309	14.869	10.437	3.30778	0.955584	0.463884	0.175778	0.00574449	30	18.4418	0.0274561	0	1.0055	0.0460555	0.965563	21.8323	7.11012e-14	7.80906e-12	yes
ENSG00000181817	LSM10	0.891223	0.853505	0.96493	1.90823	3.42403	8.18538	25.3681	39.6424	37.8084	68.8892	74.8445	61.5309	61.2668	58.7036	50.662	44.7507	11.2735	3.25438	0.144299	0.0030579	30	72.0542	0.260374	0	1.01707	0.0466296	0.9655	21.8116	7.222e-14	7.80906e-12	yes
ENSG00000239857	GET4	0.799028	1.56476	2.31583	3.12255	5.98305	12.6	33.6092	57.9028	66.8021	88.4518	99.0826	71.7433	77.748	89.0209	66.5639	38.8732	16.1844	11.2555	0.234207	0.00317945	30	93.1308	0	0	1.01024	0.0463245	0.965488	21.808	7.24178e-14	7.80906e-12	yes
ENSG00000102974	CTCF	4.70197	15.9677	27.3654	46.0403	65.381	172.261	325.773	503.762	613.836	535.811	580.767	523.226	618.343	455.315	372.664	153.825	31.3891	12.0862	2.64849	0.00442733	30	597.184	0.0107571	9.46489	1.03107	0.0473106	0.965445	21.7937	7.3204e-14	7.80906e-12	yes
ENSG00000157600	TMEM164	0.983419	1.56476	2.47022	3.60828	3.46008	13.4277	25.3681	44.3245	57.3824	73.9299	59.8378	67.7039	69.8976	72.3174	55.455	48.3318	26.5144	8.48656	0.152599	0.00213547	29.9405	73.1068	0.924816	0	1.02165	0.0468788	0.965444	21.7934	7.32192e-14	7.80906e-12	yes
ENSG00000204574	ABCF1	3.04245	4.40978	5.67379	13.1494	16.5074	28.4649	65.1761	137.11	187.832	181.884	188.177	159.73	155.78	187.987	156.443	108.801	58.0971	30.7746	0.48312	0.0021327	30	186.385	0.506355	0	1.02936	0.0472862	0.965368	21.7688	7.45921e-14	7.87512e-12	yes
ENSG00000097033	SH3GLB1	2.27416	1.92039	5.01764	4.82261	8.36185	17.8883	55.3943	94.0726	106.987	116.235	87.508	106.648	90.1386	81.2002	86.1837	55.1934	23.0429	10.8563	0.35247	0.0028133	29.8993	106.367	8.18147e-05	0	1.01598	0.046706	0.965319	21.7526	7.55074e-14	7.89203e-12	yes
ENSG00000110092	CCND1	2.45855	6.40129	14.6283	26.6111	46.0262	102.133	136.658	145.928	198.635	342.706	244.606	264.415	236.318	215.456	185.828	44.2586	6.43507	2.56395	1.14103	0.00631679	12.8271	316.06	2.40086e-07	0	1.00711	0.0464188	0.965145	21.6963	7.87985e-14	8.08706e-12	yes
ENSG00000154839	SKA1	0.0614637	0.213376	0.154389	0.48573	0.432509	1.79343	4.87298	6.20387	6.95675	64.2686	53.6125	48.7866	50.9571	50.1105	50.2813	20.3387	4.94726	1.89869	0.0296786	0.00391413	30	61.3291	1.5749e-06	0	1.01735	0.046914	0.965111	21.6855	7.94426e-14	8.08706e-12	yes
ENSG00000143322	ABL2	0.768296	1.03132	3.35796	6.55736	11.1371	25.154	42.3877	38.2767	42.8207	221.49	137.404	120.501	109.741	118.131	61.8605	7.76371	1.64506	2.36257	0.477776	0.0117345	29.7539	193.025	0.826801	2.38447	0.999886	0.0461193	0.965095	21.6804	7.97503e-14	8.08706e-12	yes
ENSG00000134248	LAMTOR5	6.63808	6.40129	7.87383	13.1147	15.3541	38.3517	100.828	279.76	323.813	564.555	616.083	578.612	585.664	600.457	547.069	466.315	366.872	207.475	0.718306	0.00126583	29.3246	604.817	0.0982398	9.96166	1.01868	0.0470119	0.965059	21.6686	8.04683e-14	8.08706e-12	yes
ENSG00000162971	TYW5	0.430246	0.213376	1.50529	2.46335	2.34276	7.03575	13.1499	16.8168	18.148	49.2066	34.0375	40.9352	42.3027	32.1518	32.0949	14.2699	4.05216	1.22264	0.0831577	0.00433186	20.0732	45.5816	0.321812	0	1.01018	0.046767	0.964845	21.6002	8.47618e-14	8.38328e-12	yes
ENSG00000104886	PLEKHJ1	0.122927	1.28026	1.00353	4.892	5.19011	15.497	40.417	70.8958	95.0179	131.898	125.12	114.983	146.156	113.859	104.012	72.6344	25.1234	11.1296	0.288591	0.00281766	30	137.44	0	0	1.03894	0.0481077	0.964832	21.5962	8.50199e-14	8.38328e-12	yes
ENSG00000213699	SLC35F6	1.56732	2.24045	1.15792	3.08786	5.04594	10.6686	32.2476	58.0199	73.3699	88.3918	99.8164	87.6168	81.7679	92.0141	85.8029	62.9844	37.9089	17.4838	0.203669	0.00225059	29.9867	86.7307	0.00639886	10	1.03229	0.0478324	0.964786	21.5814	8.5981e-14	8.39882e-12	yes
ENSG00000188739	RBM34	1.53659	1.95595	1.81407	4.92669	6.84807	13.5657	25.9773	50.2163	58.333	74.2899	60.0508	66.4237	63.7969	55.445	59.912	29.8247	5.38272	2.83365	0.209922	0.00342951	28.8736	72.0607	0.267879	0	1.0288	0.0478577	0.964519	21.4971	9.16903e-14	8.87358e-12	yes
ENSG00000177666	PNPLA2	0.276586	0.177814	0.0385972	0.20817	0.252297	0.643794	2.00652	4.76021	6.17897	23.7632	23.457	22.2171	24.6628	21.0725	18.4103	18.8352	11.8783	6.5591	0.0140898	0.0015419	30	24.0873	1.29766e-05	0	1.01688	0.0474154	0.964356	21.4463	9.53289e-14	9.14108e-12	yes
ENSG00000161960	EIF4A1	35.5875	51.4948	84.4121	142.805	212.218	429.549	1121.72	1572.39	1632.93	5234.62	3659.29	3964.8	3682.89	3729.08	3243.76	1572.1	485.582	310.925	8.30233	0.00487112	29.8911	4991.74	0.0465953	9.96998	0.940896	0.0439158	0.964288	21.425	9.68954e-14	9.20683e-12	yes
ENSG00000110090	CPT1A	4.0566	5.86785	8.49139	10.6861	13.9845	20.9693	54.3552	85.2155	84.734	63.4285	61.4473	49.0426	52.4232	56.9174	50.3485	36.9323	19.6923	6.53753	0.282442	0.00282984	30	59.3582	5.71233	3.14234	1	0.0469418	0.963892	21.303	1.06425e-13	1.00213e-11	yes
ENSG00000121067	SPOP	5.47027	17.9947	25.4742	24.8069	32.7986	86.5903	211.258	221.896	242.276	2773.63	2053.68	1770.06	1883.17	1796.98	1433.12	678.422	66.2256	17.7606	1.40952	0.00555698	30	2445.95	1.11568	0	0.980062	0.0460968	0.963755	21.261	1.0993e-13	1.02089e-11	yes
ENSG00000243646	IL10RB	0.368782	0.604566	0.192986	0.41634	0.468552	1.28759	2.75896	5.38449	7.6481	86.9516	67.7435	74.8725	72.0967	71.7864	66.8326	48.5232	21.7607	9.63009	0.0207053	0.00248366	30	81.5235	0.0804888	0	1.01415	0.0477118	0.963738	21.2558	1.10372e-13	1.02089e-11	yes
ENSG00000147419	CCDC25	5.93124	7.04142	15.0143	21.7191	25.482	47.5948	96.313	211.4	321.609	1393.93	1255.27	1202.68	1179.94	1335.94	1012.61	889.901	442.242	255.596	0.799472	0.0021761	30	1345.95	1.18394e-05	9.99544	1.00821	0.0475505	0.963564	21.203	1.14971e-13	1.04357e-11	yes
ENSG00000125445	MRPS7	12.6308	13.5138	15.9792	19.1516	38.1329	71.4152	187.072	440.436	600.009	451.74	538.682	463.629	493.019	452.708	420.616	381.515	253.665	149.288	1.30605	0.00141296	29.9823	489.452	0.111952	9.98146	1.03801	0.0489843	0.963523	21.1906	1.16074e-13	1.04357e-11	yes
ENSG00000123146	ADGRE5	5.4088	7.04142	8.49139	12.5596	17.5887	36.0525	100.111	196.885	258.307	418.256	381.442	368.616	399.003	434.074	369.394	317.601	191.71	147.652	0.584204	0.00145158	29.3618	410.388	0.544923	9.3089	1.00629	0.0474942	0.963513	21.1876	1.16346e-13	1.04357e-11	yes
ENSG00000123505	AMD1	3.25757	7.04142	13.2774	28.207	49.3782	96.6151	270.988	345.817	301.473	638.965	617.266	661.706	553.245	540.281	260.88	77.309	24.8936	14.4092	2.22161	0.00678592	30	711.587	0	0	1.01451	0.0478938	0.963495	21.1824	1.16817e-13	1.04357e-11	yes
ENSG00000109519	GRPEL1	1.41366	1.5292	2.39303	3.74706	5.37032	15.3131	37.9089	63.8336	77.7773	121.156	134.067	136.005	112.626	109.345	68.938	34.2259	9.42278	6.89713	0.346077	0.00485008	30	138.3	0	0	1.02836	0.048587	0.963439	21.1653	1.18372e-13	1.0485e-11	yes
ENSG00000173530	TNFRSF10D	0.0921955	0.640129	1.19651	2.84499	4.14488	8.87516	17.2704	22.3964	19.8764	10.1414	7.05366	8.0505	7.6613	5.57588	5.28569	3.17109	1.60877	1.02846	0.14111	0.00659865	27.7575	7.92643	0.36616	1.23591	1	0.0474014	0.963208	21.0964	1.24878e-13	1.09683e-11	yes
ENSG00000166439	RNF169	0.491709	0.78238	1.85267	2.84499	4.68552	10.3927	30.0978	32.5801	28.9936	28.3238	23.4096	23.2981	24.9702	20.1311	12.2512	3.4718	2.20147	0.568168	0.221655	0.0068561	30	28.5241	0.122329	0.221085	1	0.0474933	0.963071	21.0556	1.2891e-13	1.11651e-11	yes
ENSG00000111642	CHD4	51.6909	46.9072	88.8508	104.64	144.098	399.382	732.559	1068.9	1416.54	2641.49	2056.21	2133.1	1984.85	2270.93	1885.51	1594.98	820.665	531.751	3.8587	0.00206141	29.9086	2365.39	1.22168	9.93541	0.964164	0.0457988	0.963059	21.0522	1.29256e-13	1.11651e-11	yes
ENSG00000106638	TBL2	1.10635	1.20913	2.39303	4.892	7.1364	14.7153	48.3715	64.2628	74.2773	398.873	356.423	309.503	301.936	322.532	286.704	256.558	102.695	52.6347	0.222969	0.00237946	27.6654	361.354	1.97112	5.82588	1.02167	0.0486192	0.962929	21.0137	1.3319e-13	1.14106e-11	yes
ENSG00000101152	DNAJC5	5.28588	5.97454	6.9475	10.2697	13.9124	29.5226	90.6517	117.444	128.16	118.816	124.125	105.14	119.176	120.256	103.049	69.4086	18.5432	5.94059	0.457736	0.00310018	30	130.372	4.4921	0	1.01697	0.0484563	0.962839	20.9873	1.35964e-13	1.15536e-11	yes
ENSG00000196510	ANAPC7	0.645368	0.853505	1.69828	2.01231	3.89258	6.43794	15.4072	21.499	25.3208	48.5465	49.565	49.0142	50.3187	50.545	47.1681	38.7639	19.6076	7.52643	0.0670185	0.00194311	11.7195	53.5411	0.645343	0	1.02168	0.0487209	0.96278	20.9701	1.37806e-13	1.16157e-11	yes
ENSG00000060491	OGFR	2.45855	2.56052	3.70533	6.17571	12.3265	48.0546	120.714	172.772	172.709	49.8066	50.7485	44.1213	52.5178	46.8036	40.449	27.3643	4.88678	1.85554	0.780998	0.00400859	30	54.1103	0	1.45234	1.00453	0.048	0.962635	20.9276	1.42466e-13	1.1831e-11	yes
ENSG00000256861	AC048338.1	1.41366	1.45807	1.54389	3.81645	2.95548	8.55327	19.9935	33.2044	43.1232	146.059	123.628	97.943	116.457	115.428	99.913	78.6212	25.8129	11.6223	0.132555	0.00283339	30	132.188	0.546826	0	1.01457	0.048483	0.96263	20.9262	1.42624e-13	1.1831e-11	yes
ENSG00000157657	ZNF618	0.122927	0.853505	1.96846	3.15725	5.0099	5.47225	15.9447	18.0264	19.7036	31.6842	27.7176	27.7074	21.9671	15.7138	13.5054	2.05028	0.798336	0.46748	0.145461	0.0081723	29.3843	31.6962	0.565268	0	1.00915	0.0482816	0.962544	20.9013	1.45436e-13	1.19116e-11	yes
ENSG00000170265	ZNF282	0	0.0355627	0.578958	0.659205	1.58587	4.27663	6.91533	12.7979	14.1728	22.143	18.1549	18.6043	15.1571	20.0828	15.0956	5.90479	1.16122	0.25172	0.0612503	0.0042781	30	21.3838	0	0	1.03116	0.049366	0.962498	20.888	1.46962e-13	1.19116e-11	yes
ENSG00000105879	CBLL1	0.553173	0.889068	1.46669	3.29603	5.47845	9.19706	22.0717	29.4196	24.4998	30.244	24.0014	23.8101	23.5514	23.0759	8.53326	5.38539	1.75392	1.02486	0.18459	0.00691361	30	29.5443	0.493378	1.23359e-07	0.998013	0.0477803	0.962496	20.8876	1.47014e-13	1.19116e-11	yes
ENSG00000073008	PVR	5.4088	5.97454	8.95455	17.9026	30.4198	70.0816	213.838	243.785	280.733	850.433	856.949	700.991	853.621	775.409	688.663	410.055	101.364	39.1532	1.11563	0.00345448	29.9937	890.521	0.0274906	9.96743	1.00758	0.0482751	0.962441	20.8716	1.48871e-13	1.19692e-11	yes
ENSG00000126749	EMG1	2.39708	3.27177	4.63167	7.45943	8.5781	24.4182	67.0751	88.6491	96.2278	731.558	719.473	529.882	595.808	580.422	539.253	422.411	164.215	76.0518	0.317545	0.00267522	29.8094	694.875	3.23953	0	1.00982	0.0485346	0.962214	20.8062	1.56724e-13	1.25044e-11	yes
ENSG00000070718	AP3M2	1.47513	3.30733	4.94044	10.7555	18.7781	31.9138	80.3325	102.54	86.8081	102.254	76.7381	73.7631	73.0425	45.6691	42.7783	20.5848	5.4311	3.26517	0.673867	0.00713555	30	89.9043	1.17803	2.06645	1	0.0481234	0.962122	20.7799	1.6001e-13	1.26699e-11	yes
ENSG00000123064	DDX54	2.27416	1.49363	4.47728	6.52266	9.44312	16.0029	36.3323	64.5359	92.8142	42.4857	40.8544	38.3466	46.0624	42.9174	36.4623	27.3917	14.9869	13.2405	0.207394	0.00161297	29.2837	43.3985	1.88391	0	1.04681	0.0504855	0.961963	20.7349	1.65801e-13	1.30297e-11	yes
ENSG00000108448	TRIM16L	1.29074	1.8137	1.4281	4.02462	5.51449	8.73721	17.3421	33.9067	29.5986	51.4269	53.6836	52.8545	52.4232	50.5932	46.4962	30.0434	9.27763	3.70028	0.107273	0.00294975	30	57.5677	1.71011	0	1.02083	0.0493279	0.961821	20.6948	1.71148e-13	1.33496e-11	yes
ENSG00000184207	PGP	12.9688	12.8381	11.116	11.38	14.3809	22.7627	37.5506	75.0318	94.0241	100.093	83.7208	85.4832	77.2042	87.2106	83.0705	62.6837	31.7036	11.2519	0.208852	0.00198059	29.8872	92.7448	10	0.0835544	1.06941	0.0517272	0.961748	20.674	1.7398e-13	1.34699e-11	yes
ENSG00000146731	CCT6A	11.3093	11.3801	12.4283	22.2048	29.9873	58.7692	169.838	363.727	469.688	873.116	849.8	936.191	835.366	883.789	840.828	750.783	453.068	256.848	1.0635	0.00145126	29.996	919.968	0.0581102	9.99475	1.01768	0.0492813	0.961663	20.6505	1.77265e-13	1.35937e-11	yes
ENSG00000127463	EMC1	0.983419	0.711254	3.12637	4.02462	4.10884	10.6686	21.0685	24.5814	30.4196	85.2714	70.3709	78.9689	70.4414	74.0554	65.1081	56.6969	32.1754	28.7572	0.08149	0.00203789	1.50939	70.2213	0.983558	10	0.994744	0.0482082	0.961606	20.6343	1.7955e-13	1.35937e-11	yes
ENSG00000148308	GTF3C5	3.07318	2.13376	6.02116	9.99216	10.3802	42.1225	114.945	202.426	237.653	612.562	534.563	436.036	512.362	478.898	466.664	363.691	119.605	43.339	0.753698	0.00272051	29.975	559.983	0.0203079	9.99413	1.03275	0.050069	0.961578	20.6264	1.80675e-13	1.35937e-11	yes
ENSG00000113580	NR3C1	5.16295	19.0261	46.0465	78.0638	107.947	251.31	506.682	478.44	417.967	1275.29	1106.48	1149.23	1043.24	964.337	580.06	151.256	21.0108	23.4315	3.47343	0.00697929	17.5625	1333.97	2.00932	0	1.00041	0.0485033	0.961575	20.6257	1.80781e-13	1.35937e-11	yes
ENSG00000148337	CIZ1	6.60734	7.71711	7.44926	10.7555	14.6332	34.0751	68.2575	129.15	180.832	256.234	289.105	264.415	288.127	269.67	269.772	229.166	153.184	130.902	0.353668	0.00108333	30	284.472	5.53457	0.692889	1.00825	0.0491615	0.961153	20.509	1.98387e-13	1.4811e-11	yes
ENSG00000168884	TNIP2	0.460977	0.640129	1.3895	2.49804	3.46008	6.20802	12.5766	20.9527	25.4072	74.5299	75.0576	56.1544	57.3179	74.0071	50.662	38.0531	11.1041	5.36164	0.085802	0.00321721	29.5187	74.1193	0.636427	0	1.0133	0.0495568	0.960928	20.4473	2.08423e-13	1.54499e-11	yes
ENSG00000122873	CISD1	1.41366	1.17357	2.779	4.54505	4.25301	8.96713	24.0066	43.3491	46.4071	185.185	200.603	172.986	192.833	208.818	158.056	135.783	64.641	29.7533	0.132671	0.00216596	29.8486	204.736	1.34422	0	1.01705	0.0498455	0.960768	20.404	2.15782e-13	1.58827e-11	yes
ENSG00000132275	RRP8	0.706832	0.78238	1.58249	5.75937	8.14559	18.2102	47.619	66.2527	74.623	124.097	84.6202	102.153	79.0959	67.2485	58.4338	15.3087	4.10054	2.21154	0.440416	0.00642712	30	110.999	0	0	1.02783	0.0504282	0.960687	20.382	2.19627e-13	1.60527e-11	yes
ENSG00000166166	TRMT61A	0.368782	0.284502	1.23511	1.66536	3.38799	7.72553	16.1238	25.908	30.2467	38.8852	46.1565	37.8345	47.4812	38.9587	25.9805	16.1288	7.5479	2.66104	0.117668	0.00372588	30	45.59	0.101201	0	1.00953	0.0495871	0.960601	20.3587	2.23768e-13	1.62418e-11	yes
ENSG00000151247	EIF4E	3.68782	2.63164	2.27724	3.26133	4.57739	8.64524	22.645	39.4863	38.8886	102.734	97.8991	102.267	93.0234	86.7278	91.4917	60.6061	11.2372	2.81567	0.137814	0.00307219	30	108.307	1.65479	0	1.03104	0.0506862	0.960537	20.3415	2.26882e-13	1.63543e-11	yes
ENSG00000144320	LNPK	1.72098	1.77814	1.4281	2.0817	2.41484	2.85109	8.34856	10.847	13.9567	46.0861	36.6412	42.4998	33.0808	39.3208	27.1676	23.7559	9.56794	2.41651	0.0418939	0.00309253	30	43.136	1.30328	0	1.01029	0.0496983	0.960488	20.3285	2.29269e-13	1.64132e-11	yes
ENSG00000164548	TRA2A	8.85077	12.8026	22.6952	48.7118	87.5111	148.624	343.975	561.236	602.688	441.659	547.25	493.043	488.243	457.85	444.267	357.568	191.068	74.2071	1.76351	0.0021669	13.5296	518.791	3.48554	7.51656	1.0057	0.0495481	0.960371	20.2974	2.35096e-13	1.67158e-11	yes
ENSG00000175745	NR2F1	3.96441	7.1481	14.7827	25.8131	38.9619	101.306	229.03	274.96	234.801	781.784	584.27	747.872	525.414	585.998	352.775	87.123	14.612	6.32896	1.85975	0.00703907	29.9968	768.323	0.0933368	9.94169	1.00895	0.0498781	0.960111	20.2283	2.48573e-13	1.75546e-11	yes
ENSG00000122741	DCAF10	0.184391	0.711254	1.19651	1.24902	2.70318	4.55254	17.4137	22.5915	21.3023	50.8268	36.5701	42.7274	36.7459	40.0691	29.2281	17.4957	2.20147	1.18668	0.107131	0.00442044	30	47.1812	0.0800652	0	1.01308	0.0501117	0.960066	20.2163	2.50997e-13	1.76068e-11	yes
ENSG00000119812	FAM98A	1.04488	0.640129	1.3895	2.42865	2.73923	8.87516	24.9023	47.7191	60.0614	158.601	150.257	144.312	130.313	148.111	140.026	105.658	42.5295	12.4925	0.176358	0.00261987	29.3327	151.151	0.444821	9.84519	1.05418	0.0521913	0.959997	20.1983	2.54687e-13	1.77466e-11	yes
ENSG00000184047	DIABLO	9.92638	10.5266	10.6914	26.3335	20.4721	59.2291	139.596	230.636	302.554	1026.68	869.115	685.118	826.948	817.313	704.923	554.039	180.847	81.3559	0.951274	0.00288741	29.7837	922.182	0.209018	9.90457	1.00765	0.049942	0.959914	20.1764	2.59256e-13	1.79453e-11	yes
ENSG00000066230	SLC9A3	0.215123	0.889068	3.31936	7.97985	12.8311	18.624	28.2346	30.317	28.2591	11.1615	8.45019	9.30217	5.69869	7.9414	4.88255	1.69489	1.16122	0.614916	0.315041	0.0108055	17.9249	9.81451	0.552095	1.22289	1	0.0496383	0.959797	20.1457	2.65776e-13	1.82756e-11	yes
ENSG00000071626	DAZAP1	24.0938	25.3207	41.0674	53.014	72.5174	182.838	345.551	500.095	735.428	739.539	778.364	616.503	709.569	677.216	693.411	567.516	351.558	210.352	1.61899	0.00154267	11.3861	742.198	10	9.45649	1.01172	0.0503119	0.959655	20.1089	2.73844e-13	1.87073e-11	yes
ENSG00000265241	RBM8A	7.28344	9.28187	12.4283	17.7985	23.4636	45.9393	104.411	201.255	224.171	379.671	277.862	299.974	311.749	262.742	253.377	215.744	95.6189	36.0355	0.683884	0.0025836	25.4302	325.028	4.32086	9.15865	1.02149	0.0508549	0.959568	20.0863	2.78921e-13	1.88994e-11	yes
ENSG00000213588	ZBTB9	0.307318	0.960193	0.887736	2.15109	2.91944	8.36932	9.81761	9.52041	10.4135	23.1031	27.3152	19.8276	19.508	15.4966	5.08412	0.683425	0.229824	0.399156	0.102346	0.0104298	29.2582	27.3631	0.763235	0	1.00851	0.0502238	0.959545	20.0804	2.80273e-13	1.88994e-11	yes
ENSG00000178177	LCORL	0.184391	0.817942	2.58601	3.64298	3.74841	9.88684	21.4268	25.2057	27.7406	23.5231	16.214	18.519	14.897	14.6276	4.43461	2.76104	1.18541	0.248124	0.193464	0.00746505	30	21.1451	0.369193	0	1.01973	0.0508316	0.95947	20.0609	2.8476e-13	1.8918e-11	yes
ENSG00000176095	IP6K1	0.184391	1.10244	0.810541	1.59597	2.6311	12.0941	28.7362	47.9142	56.2589	82.451	81.4248	74.0191	94.6313	77.7244	68.0869	34.6907	4.79002	1.38086	0.212437	0.00362776	30	91.1454	0	0	1.05115	0.0524132	0.959447	20.0551	2.86103e-13	1.8918e-11	yes
ENSG00000261915	AC026954.2	0.430246	0.569003	1.46669	1.73475	2.59506	5.33429	12.1824	19.7431	25.0616	192.266	143.203	154.012	137.1	163.994	140.564	102.022	60.3348	30.1632	0.0716586	0.00244354	30	161.085	0.553638	9.99883	1.00911	0.0503557	0.959387	20.0396	2.89747e-13	1.8918e-11	yes
ENSG00000185129	PURA	2.21269	2.34714	7.25628	8.67375	18.8862	32.4196	81.7657	104.256	111.654	92.9524	77.2115	89.5796	68.8572	71.6174	44.2789	13.8325	2.4071	2.18996	0.611068	0.00649888	16.7191	83.8021	0.0525657	10	1.15279	0.0575329	0.959377	20.037	2.90355e-13	1.8918e-11	yes
ENSG00000169714	CNBP	17.2713	22.6534	28.7163	57.1427	79.2934	187.804	555.304	1212.72	1247.37	1260.47	1272.5	1327.88	1225.26	1254.21	1176.2	1048.98	480.187	268.887	3.44191	0.00186765	29.8498	1354.51	0.0327379	9.97736	1.01842	0.0508349	0.959365	20.0338	2.91112e-13	1.8918e-11	yes
ENSG00000127948	POR	5.04002	8.74843	9.6493	8.88192	12.759	20.4635	51.4171	108.275	111.135	106.634	98.0885	92.5096	98.5092	88.6106	90.5735	60.4694	56.6335	32.4072	0.288684	0.00182011	28.8326	92.2021	5.02599	10	0.995612	0.04972	0.959328	20.0244	2.93371e-13	1.8918e-11	yes
ENSG00000162924	REL	0.245855	1.38695	1.3895	3.53889	8.36185	17.1065	21.5343	21.7331	21.7344	100.513	46.8193	51.8304	41.7352	32.1277	13.2142	2.7337	0.713664	0.787524	0.426597	0.0203359	30	87.4313	0.187299	2.44302	1	0.0499568	0.9593	20.0173	2.95075e-13	1.8918e-11	yes
ENSG00000141956	PRDM15	1.07561	3.23621	4.90185	9.50643	14.0205	21.7051	35.2933	34.6481	38.759	41.8256	48.2158	32.3158	40.5056	35.9898	17.716	9.56795	2.62483	2.74375	0.266979	0.00733059	16.6574	45.3498	2.54854	2.12388	1.00005	0.0500014	0.959235	20.0005	2.99148e-13	1.8918e-11	yes
ENSG00000162734	PEA15	0.33805	1.03132	1.69828	3.26133	5.73075	17.6124	34.6125	58.7612	93.4624	109.035	105.971	92.3105	100.968	107.873	96.1727	86.2209	48.9162	33.6118	0.205125	0.0016438	28.4325	99.2161	1.07316	9.85415	1.03903	0.0519759	0.959196	19.9905	3.01592e-13	1.8918e-11	yes
ENSG00000171135	JAGN1	0.399514	0.462315	2.08425	2.98377	4.72156	12.3241	38.8405	45.0269	61.3144	104.174	104.976	97.9146	106.36	99.5692	90.6183	39.1192	3.85862	1.57864	0.236641	0.00384887	30	115.583	0	0	1.03676	0.0518761	0.959175	19.9852	3.02906e-13	1.8918e-11	yes
ENSG00000143315	PIGM	0.245855	0.640129	2.27724	3.15725	4.79365	9.19706	20.746	28.7563	38.4998	139.879	108.716	93.6475	91.7938	92.1589	91.223	50.6555	9.51955	2.59991	0.148472	0.0040302	19.8142	121.647	0	0	1.0226	0.0512192	0.959096	19.9651	3.07936e-13	1.8918e-11	yes
ENSG00000118705	RPN2	4.11807	4.65872	8.37559	7.11248	13.588	14.7613	46.7949	99.4571	139.697	947.226	792.069	790.172	703.776	826.34	701.743	598.243	359.118	269.441	0.323721	0.00170581	29.9356	848.63	0.00381971	8.3563	0.992138	0.0496996	0.959086	19.9627	3.08545e-13	1.8918e-11	yes
ENSG00000113734	BNIP1	0.553173	0.960193	4.36148	6.80022	6.95619	18.5781	33.3226	55.3276	51.5923	106.034	103.698	81.4153	80.3728	106.014	62.8236	45.3794	8.80589	3.84772	0.22927	0.00399662	29.2399	106.537	1.82634	0	1.01199	0.0507137	0.959056	19.955	3.10489e-13	1.8918e-11	yes
ENSG00000099364	FBXL19	0	0.426753	0.771944	1.3878	0.432509	3.49488	8.52771	9.52041	9.85179	50.4067	53.0208	52.2287	54.3385	49.5312	36.6415	19.6826	0.96768	0	0.0467555	0.00430197	29.9439	58.275	0.316204	0	1.02818	0.0515283	0.959051	19.9537	3.10828e-13	1.8918e-11	yes
ENSG00000067596	DHX8	0.245855	0.213376	0.192986	0.520425	0.865019	2.25328	3.22476	5.46253	5.44441	11.3415	11.4326	12.4313	9.95497	9.34141	10.3698	6.83425	1.65715	0.956536	0.0189666	0.00295973	30	12.205	0.31574	0	1.01801	0.0510298	0.959033	19.9493	3.11955e-13	1.8918e-11	yes
ENSG00000104689	TNFRSF10A	0.399514	1.20913	1.73687	4.96139	8.10955	15.543	26.1922	25.1667	31.4566	128.537	73.9451	84.9712	68.3606	56.5312	41.4568	13.3131	1.71763	1.02126	0.301005	0.0110049	29.2346	109.198	0.653632	3.23106	0.999935	0.0501255	0.959031	19.9486	3.12113e-13	1.8918e-11	yes
ENSG00000284934	DIABLO	2.88879	3.12952	3.08778	7.6329	5.98305	17.0605	40.1662	66.7599	87.4995	295.719	254.5	200.95	242.963	238.749	206.724	162.354	52.5813	23.5862	0.27453	0.00298101	22.9267	263.369	0.478404	8.78616	1.02678	0.0515022	0.958984	19.9367	3.15183e-13	1.8918e-11	yes
ENSG00000119661	DNAL1	0.0921955	0.569003	0.463167	0.520425	0.684807	3.17299	6.4137	10.1837	11.7098	38.3451	27.5992	36.4406	28.257	34.2518	24.4127	12.083	2.98771	1.17949	0.0493168	0.00413929	30	37.0725	0	0	1.01856	0.0510902	0.958983	19.9364	3.15257e-13	1.8918e-11	yes
ENSG00000120942	UBIAD1	1.13708	0.817942	1.11932	2.04701	2.91944	8.55327	15.9447	18.3385	21.6048	389.872	244.487	242.966	240.456	237.59	190.061	75.0674	5.63674	1.98859	0.13193	0.0064591	29.305	321.522	0.204181	8.38725	1.00371	0.050346	0.958982	19.9363	3.15284e-13	1.8918e-11	yes
ENSG00000100266	PACSIN2	0.553173	0.746817	1.89126	3.15725	4.00071	8.87516	19.4919	33.8287	35.4751	102.494	89.4726	71.9709	68.9754	62.6622	66.1383	49.4253	17.1158	5.07755	0.133461	0.00330614	28.0608	89.2805	0.302779	0.329847	0.999104	0.050129	0.95896	19.9307	3.16747e-13	1.8918e-11	yes
ENSG00000105127	AKAP8	0.768296	1.49363	3.66674	6.55736	11.6778	17.3365	44.3584	52.3623	53.8392	285.758	186.946	211.503	194.37	203.145	168.291	58.3098	9.3744	3.01704	0.285728	0.00513448	29.5107	253.814	2.00923	0	1.01292	0.0508876	0.958859	19.9051	3.23455e-13	1.92088e-11	yes
ENSG00000128059	PPAT	0.153659	0.533441	0.540361	1.35311	3.67633	6.66787	16.1238	21.9672	20.2653	63.0684	43.7658	55.0165	40.9549	34.0587	35.4097	14.0786	2.38291	1.45278	0.124633	0.00566351	30	56.9893	3.41097e-07	0	1.00028	0.0503684	0.958677	19.8594	3.3584e-13	1.98317e-11	yes
ENSG00000170949	ZNF160	0.122927	0.284502	0.926333	2.56743	4.79365	9.15107	11.1075	12.7589	13.6542	73.6898	43.2688	56.7802	29.0373	35.1449	14.2445	3.82718	0.919296	1.39884	0.171925	0.0139398	29.9511	67.1418	0.408608	1.3886	1.0001	0.050436	0.958556	19.8291	3.44319e-13	1.9861e-11	yes
ENSG00000107954	NEURL1	0.184391	0.39119	0.463167	1.17963	2.27067	4.27663	10.4984	16.4266	20.9567	33.2444	40.097	28.2194	36.1311	29.4242	26.0701	13.7505	7.05197	4.6784	0.0727943	0.00330806	30	36.6886	0.00203892	3.229e-07	0.999944	0.0504302	0.958553	19.8283	3.44544e-13	1.9861e-11	yes
ENSG00000141965	FEM1A	0.460977	0.640129	2.7018	5.82876	7.8933	15.9109	29.847	37.0282	53.1046	56.2875	60.4532	49.128	48.4507	45.4519	23.0689	5.63142	1.43942	1.29816	0.29256	0.00660244	28.8512	61.2754	5.40338e-07	0	1.01831	0.0513603	0.958547	19.8267	3.44987e-13	1.9861e-11	yes
ENSG00000136950	ARPC5L	5.10148	3.98302	9.26333	16.5842	21.6976	60.2407	184.528	310.818	349.047	334.245	385.442	273.66	295.339	325.718	273.96	204.207	54.0449	21.6192	1.18074	0.00295712	30	348.553	2.09992	6.6184	1.04385	0.0526554	0.958536	19.8241	3.4573e-13	1.9861e-11	yes
ENSG00000171475	WIPF2	1.16781	4.26753	5.21062	11.033	19.9315	53.8028	101.759	128.135	186.104	256.834	284.963	222.655	274.861	214.635	171.673	72.6891	10.9469	5.38681	0.830429	0.00501653	29.7585	276.075	0.0126531	9.98594	1.03311	0.0521297	0.958512	19.818	3.47478e-13	1.9861e-11	yes
ENSG00000136213	CHST12	1.19854	2.13376	1.77547	3.22664	5.40637	12.0481	28.1271	32.6581	38.6294	111.735	73.9451	74.1329	76.8968	60.5864	55.6341	36.7683	4.08845	0.4495	0.187583	0.00498184	30	93.6195	1.01617	0	1.00582	0.0507553	0.958508	19.8171	3.47738e-13	1.9861e-11	yes
ENSG00000134748	PRPF38A	1.56732	3.20064	6.05976	5.89815	11.029	20.4635	50.0913	87.2054	98.3451	109.635	92.9048	109.236	95.719	84.314	100.495	56.0408	19.4988	7.21358	0.319674	0.00282277	30	109.9	1.70721	0	1.02643	0.0519627	0.958251	19.7533	3.6655e-13	2.08216e-11	yes
ENSG00000140983	RHOT2	2.58147	2.80945	3.43515	5.34303	7.8933	18.5781	45.5408	63.7946	84.1291	94.4526	88.2181	77.2336	83.5413	93.6072	65.6232	58.7472	41.2353	33.1443	0.216541	0.0020016	29.6172	80.9458	2.6718	10	0.983559	0.0498796	0.95811	19.7187	3.77187e-13	2.12987e-11	yes
ENSG00000176788	BASP1	17.5171	34.4958	38.9832	68.4186	113.39	287.408	691.246	1438.36	1654.67	3206.23	2734.97	2664.52	2411.56	2765.93	2641.32	1949.73	575.649	212.926	5.08921	0.0026108	30	3046.24	0.913957	9.25888	1.03706	0.0526087	0.958086	19.7128	3.79024e-13	2.12987e-11	yes
ENSG00000176834	VSIG10	0.645368	1.13801	0.733347	2.0817	1.51378	3.63284	4.90881	6.82816	9.11723	8.70116	9.27864	7.1402	6.81005	7.19312	7.18944	4.70196	3.21754	1.18668	0.0231974	0.00230714	0.771873	8.51075	0.645372	0	1.00648	0.0510956	0.958026	19.6979	3.83721e-13	2.13908e-11	yes
ENSG00000165898	ISCA2	0.122927	0.533441	0.656153	0.797985	1.58587	2.57518	5.87624	9.44237	7.99378	22.203	20.8296	14.9347	20.4538	17.9345	12.8335	7.84572	1.00397	0.373984	0.0409568	0.00455171	29.9922	21.9416	0.314519	0	1.01391	0.0514814	0.958012	19.6947	3.84756e-13	2.13908e-11	yes
ENSG00000164631	ZNF12	0.0614637	1.8137	2.93339	10.2697	14.5611	22.9467	37.1564	39.6814	38.2405	26.5235	22.5575	23.1274	17.2143	19.1414	3.33715	6.56088	1.74182	1.30175	0.397663	0.0103357	21.9834	25.8521	0.937581	1.61931	1	0.0508181	0.957944	19.678	3.90111e-13	2.15737e-11	yes
ENSG00000163468	CCT3	25.5996	25.3562	27.2496	33.3072	41.8453	100.34	242.932	471.221	648.274	481.384	537.12	555.854	500.255	531.615	472.039	433.948	367.67	275.105	1.22515	0.00086186	29.0824	521.978	9.44223	10	1.00102	0.0509014	0.957895	19.6659	3.94039e-13	2.16763e-11	yes
ENSG00000099875	MKNK2	5.99271	3.55627	2.7404	8.98601	14.7414	37.8919	88.5377	187.716	215.227	388.312	344.848	383.949	313.972	263.877	217.99	90.4855	26.5749	12.0394	0.967466	0.00496437	30	387.46	0	0	1.04391	0.0531517	0.957789	19.6403	4.02531e-13	2.20275e-11	yes
ENSG00000131944	FAAP24	0.122927	0.960193	0.733347	0.6939	1.694	3.49488	8.06191	8.23281	10.4999	101.774	66.4654	67.0211	64.128	67.7312	40.5386	20.6668	2.92723	1.43121	0.0623091	0.00661403	30	88.0068	0.260759	0.673538	0.999996	0.050944	0.957744	19.6293	4.06216e-13	2.20748e-11	yes
ENSG00000185262	UBALD2	0.0921955	0.177814	0.887736	1.66536	2.30672	5.15035	11.5017	14.1636	12.0123	14.5819	15.2435	14.7071	10.4752	13.0345	10.4818	3.93653	1.2096	0.794716	0.075822	0.00549585	29.9351	15.4263	0.422727	0.567848	0.999993	0.0509547	0.957727	19.6252	4.0762e-13	2.20748e-11	yes
ENSG00000284194	SCO2	0.921955	0.995756	1.08072	1.52658	4.61343	7.63356	15.0847	14.9829	16.6789	86.4715	61.1159	71.5158	73.9647	57.2553	51.2443	16.8396	2.58854	1.43121	0.0895862	0.00533465	24.8258	82.1161	0.958918	0	1.01198	0.0515974	0.957677	19.6131	4.11726e-13	2.20837e-11	yes
ENSG00000185670	ZBTB3	0.0921955	0.284502	0.617555	0.6939	1.62191	2.57518	3.83389	3.55065	2.89504	25.9835	15.0778	14.4511	11.492	10.2586	1.27663	1.14815	0.24192	0.237336	0.0574472	0.0184168	30	24.0425	0.25239	0.295335	1.00003	0.0509898	0.957674	19.6123	4.1201e-13	2.20837e-11	yes
ENSG00000086544	ITPKC	0.245855	0.213376	0.0771944	0.48573	0.937104	1.60949	2.7948	5.54057	5.18515	6.54087	6.72228	6.00232	4.06711	4.58622	2.9788	0.984132	0.193536	0	0.0320482	0.00637565	30	6.67914	0.0161878	0	1.02369	0.0522365	0.957612	19.5973	4.17194e-13	2.21102e-11	yes
ENSG00000130489	SCO2	0.921955	0.995756	1.04212	1.52658	4.61343	7.63356	15.0131	14.9829	16.5925	86.4115	61.0686	71.3451	73.8701	57.2553	51.2443	16.8396	2.58854	1.43121	0.0882274	0.00533357	29.8493	82.0338	1.21544	0	1.01194	0.0516388	0.957608	19.5965	4.17449e-13	2.21102e-11	yes
ENSG00000213221	DNLZ	0.614637	1.03132	0.463167	1.66536	1.04523	4.59853	6.37787	12.3297	16.1604	41.2255	38.2981	30.5236	40.411	33.8415	28.377	21.8149	13.5354	9.32083	0.0480321	0.00281719	29.5993	35.0985	0.423867	4.35727	1	0.0510399	0.957592	19.5925	4.18849e-13	2.21102e-11	yes
ENSG00000164008	C1orf50	0.122927	0.320064	0.733347	0.728595	1.11732	2.02335	4.65799	7.60853	10.2407	38.7052	29.6585	27.7074	26.72	30.7277	19.7094	13.5318	2.93933	1.24422	0.040278	0.00437592	30	34.8007	0.106077	0	1.01174	0.0516635	0.957553	19.5832	4.2211e-13	2.21703e-11	yes
ENSG00000234616	JRK	1.32147	3.59183	4.70886	9.47174	13.6961	23.9124	32.4626	38.901	42.6911	81.0108	69.0217	36.6682	34.0266	27.638	17.0441	3.52647	1.83859	0.571764	0.620084	0.0181107	30	78.0314	2.08755	1.97292	1	0.0511568	0.957406	19.5477	4.34775e-13	2.26982e-11	yes
ENSG00000156853	ZNF689	0.33805	0.640129	2.00705	4.37157	6.27139	9.15107	14.4756	12.7589	12.6604	36.9649	22.2498	29.784	20.7848	14.9414	8.91401	3.55381	0.435456	0.284084	0.159115	0.0122631	17.1759	33.8781	0.489087	0.777181	1	0.0511693	0.957386	19.543	4.36504e-13	2.26982e-11	yes
ENSG00000126067	PSMB2	6.39222	4.83653	9.7265	9.29826	13.9124	26.6255	56.1467	116.859	163.808	331.244	313.793	293.004	257.174	316.039	276.625	241.55	181.634	130.47	0.3427	0.00122674	29.9601	304.549	0.0148659	9.97585	0.985272	0.0504833	0.957276	19.5168	4.46158e-13	2.30853e-11	yes
ENSG00000264364	DYNLL2	0.799028	0.355627	2.00705	2.49804	3.8205	10.1628	24.544	33.2824	28.1295	114.555	107.485	85.4263	95.5771	101.452	83.7424	40.6228	9.77357	2.44168	0.137399	0.00398812	29.6899	114.402	0.957808	0	1.01705	0.0521403	0.957231	19.5061	4.50178e-13	2.31786e-11	yes
ENSG00000188529	SRSF10	3.4727	5.76116	12.7371	22.2395	32.4742	50.078	137.232	205.664	209.005	470.283	335.002	406.536	312.978	292.577	273.736	209.757	53.0772	17.642	0.889368	0.00388285	24.9529	403.83	2.6681	9.16535	1.01047	0.0518417	0.957169	19.4913	4.55754e-13	2.33507e-11	yes
ENSG00000136026	CKAP4	1.81318	1.38695	2.47022	2.87969	4.72156	9.01312	19.9935	29.6147	33.2714	124.877	130.942	114.727	132.701	131.625	118.167	88.5172	46.6422	23.5286	0.102817	0.00230257	29.7567	126.762	0.049304	9.97984	0.972647	0.0500171	0.956979	19.4463	4.73292e-13	2.4131e-11	yes
ENSG00000121481	RNF2	0.122927	0.213376	0.617555	0.242865	2.1265	4.18466	13.0782	16.2315	16.895	40.5054	31.2444	37.1233	21.9908	25.5863	17.4697	7.79104	0.943488	0.762352	0.110912	0.00677909	30	38.2133	0	0	1.02184	0.0526145	0.956873	19.4213	4.83318e-13	2.45225e-11	yes
ENSG00000180304	OAZ2	3.41123	1.74257	3.24217	4.82261	8.46998	14.0715	53.8894	115.572	145.876	121.036	114.918	92.2252	101.772	97.6865	95.5456	81.3549	57.3229	28.3221	0.35089	0.00168981	30	101.837	0	9.467	1.04633	0.0540359	0.956627	19.3636	5.07345e-13	2.56172e-11	yes
ENSG00000068354	TBC1D25	0.0307318	0.106688	0.115792	0.20817	0.504594	1.65547	3.72639	3.39457	3.88886	18.8425	17.0187	15.1623	16.8832	15.8587	12.0944	6.91626	0.157248	0.298468	0.0191071	0.00444689	25.2921	19.0837	0.0687111	0	1.02126	0.0527773	0.95657	19.3504	5.13012e-13	2.57789e-11	yes
ENSG00000144659	SLC25A38	0.215123	0.853505	2.85619	2.49804	4.18092	10.5766	33.5017	37.8475	42.4318	73.8098	89.9933	79.8792	77.0623	81.0795	66.9446	39.7207	13.4024	4.82943	0.160986	0.00324791	24.7122	88.6173	0.534309	0	1.01616	0.0525453	0.956521	19.3388	5.18034e-13	2.59067e-11	yes
ENSG00000161011	SQSTM1	27.3513	24.076	39.4078	53.4997	68.0842	185.459	495.037	950.207	1044.77	2176.73	2161.64	2264.95	2062.19	2224.36	2161.06	1598.01	797.997	286.767	3.07788	0.00223998	30	2476.08	4.98144e-05	0	0.976557	0.050541	0.956448	19.3221	5.2541e-13	2.61504e-11	yes
ENSG00000137522	RNF121	16.4415	17.5324	17.5617	21.0599	19.7152	29.9824	75.9969	94.931	115.888	269.916	306.645	237.362	259.515	273.773	212.458	168.888	38.1266	11.6618	0.357968	0.00308415	14.6531	296.371	10	0	1.0151	0.0526131	0.956326	19.2937	5.38149e-13	2.66575e-11	yes
ENSG00000186812	ZNF397	0.307318	0.604566	1.00353	0.90207	2.41484	2.11532	4.87298	5.93075	7.34563	13.0217	14.6281	9.81421	9.4584	9.67934	7.21183	3.58115	0.810432	0.37758	0.0349366	0.00549309	21.9133	13.3488	0.455941	0	1.00183	0.0519416	0.9563	19.2877	5.40872e-13	2.6666e-11	yes
ENSG00000168214	RBPJ	3.56489	8.53505	11.4248	17.8679	27.3562	51.5955	131.714	181.083	185.024	369.409	327.403	384.916	329.814	350.001	325.518	140.95	12.5798	7.16323	0.798134	0.00380085	21.3897	398.678	8.00655e-06	0	1.0187	0.0528933	0.956178	19.2596	5.53873e-13	2.71788e-11	yes
ENSG00000118508	RAB32	0.307318	0.355627	0.501764	0.83268	0.973146	2.20729	6.70034	13.6563	14.7345	24.0632	24.9482	23.355	19.9099	24.6932	22.3522	17.1403	7.22131	3.34788	0.0429905	0.002197	30	25.4808	7.27956e-07	0	1.02118	0.0530642	0.956111	19.2442	5.61122e-13	2.74058e-11	yes
ENSG00000163684	RPP14	1.87464	2.6672	5.36501	5.86346	10.5604	30.5802	47.6548	45.378	47.617	599.96	335.073	352.43	285.596	293.011	179.109	36.8229	4.68115	1.91307	0.554848	0.0116986	29.3177	508.163	0.144157	9.37751	0.984009	0.0512271	0.955956	19.2088	5.78246e-13	2.81108e-11	yes
ENSG00000160799	CCDC12	2.39708	0.711254	6.32994	6.939	11.029	34.8569	59.3357	71.8713	65.5922	49.8066	45.7304	49.384	37.7863	41.5174	38.1645	9.13056	4.16102	2.0713	0.441633	0.00616227	26.0732	51.0748	1.55431	2.70962	1	0.0520878	0.95591	19.1983	5.83382e-13	2.81695e-11	yes
ENSG00000107262	BAG1	8.45125	9.31743	11.7336	18.3537	30.2396	51.2276	121.609	182.839	273.862	263.075	320.421	284.726	265.308	258.687	262.47	157.899	109.977	88.4616	0.665069	0.00198684	23.2403	285.113	4.11359	9.99294	1.00506	0.0523595	0.955897	19.1954	5.84842e-13	2.81695e-11	yes
ENSG00000011304	PTBP1	23.9094	30.0861	51.3343	73.3106	99.8736	233.881	339.424	558.934	796.396	1732.55	1847.06	1522.63	1726.25	1690.6	1695.59	1369.88	840.781	470.839	1.82988	0.00156877	29.0952	1813.66	10	9.42849	0.976629	0.050908	0.955848	19.1842	5.90442e-13	2.83087e-11	yes
ENSG00000089234	BRAP	0	0.497878	0.578958	1.17963	1.91025	4.18466	9.81761	13.8124	21.3023	18.5425	15.1488	17.4949	18.2784	12.5518	11.736	8.39246	2.52806	0.73718	0.0678422	0.00322969	30	17.8981	0	0	1.03753	0.0541281	0.955777	19.1681	5.98553e-13	2.85603e-11	yes
ENSG00000198746	GPATCH3	0.307318	0.426753	1.54389	4.44096	7.06432	15.4511	26.2997	33.0873	45.8454	72.5497	70.1105	45.2023	56.8923	44.6553	27.1452	7.463	2.92723	1.11476	0.292849	0.00778756	30	71.9063	0	0	1.00779	0.0525904	0.955755	19.163	6.01155e-13	2.85603e-11	yes
ENSG00000081692	JMJD4	2.58147	3.55627	2.62461	3.88584	6.34347	16.3708	33.5375	36.8331	35.0862	267.636	251.091	184.45	209.504	182.676	169.321	108.036	19.4988	8.7167	0.163729	0.00416184	28.3889	251.729	3.01229	0	1.00786	0.0526427	0.955676	19.1453	6.10273e-13	2.88623e-11	yes
ENSG00000100216	TOMM22	3.01172	3.23621	3.51235	6.34919	7.67704	16.0489	46.9382	83.0695	123.45	196.406	224.818	181.634	194.063	209.276	174.585	167.33	100.602	58.3307	0.269432	0.00149547	30	211.486	0.65947	0	1.01626	0.0531849	0.955511	19.108	6.29954e-13	2.96589e-11	yes
ENSG00000083099	LYRM2	1.26001	1.99151	4.55447	5.79407	8.90248	15.9109	47.9057	65.2772	74.4069	565.275	387.904	355.9	342.607	337.425	274.856	132.94	25.5588	9.96092	0.411698	0.00593622	30	474.036	0	5.74355	1.00355	0.0525842	0.955407	19.0847	6.42606e-13	3.01189e-11	yes
ENSG00000179542	SLITRK4	0.829759	0.960193	1.69828	1.59597	4.97386	7.35765	11.1434	15.7243	17.2406	35.1047	39.7656	38.2043	29.392	28.8449	33.4611	16.6482	4.63277	1.77283	0.0634753	0.0034277	10.3957	38.9442	0.82979	0	1.01744	0.0533269	0.955383	19.0793	6.45557e-13	3.01222e-11	yes
ENSG00000198131	ZNF544	0.768296	1.56476	3.55094	7.00839	7.85725	24.878	43.1043	55.0155	71.6415	61.2082	37.943	41.9593	38.4248	40.3829	24.1888	16.6756	3.3385	2.38055	0.324667	0.00485017	28.7196	50.2604	1.06359	0	1.01105	0.0531083	0.955195	19.0374	6.69085e-13	3.09516e-11	yes
ENSG00000148300	REXO4	0.921955	0.78238	1.23511	3.81645	5.55054	11.2204	30.8144	62.3509	71.3823	220.949	203.467	149.062	174.082	199.573	149.478	110.879	32.6592	11.7373	0.243879	0.00315154	30	209.106	0	0	1.03022	0.0541162	0.955194	19.0371	6.69255e-13	3.09516e-11	yes
ENSG00000152332	UHMK1	1.56732	0.853505	4.97904	4.78791	4.00071	14.7613	41.2053	53.8449	50.9441	109.455	87.8394	108.127	74.9815	69.5899	68.6692	40.8141	7.14874	2.6934	0.254097	0.00445527	30	104.296	0.986432	0	1.00649	0.0529298	0.955097	19.0156	6.81708e-13	3.13886e-11	yes
ENSG00000147454	SLC25A37	5.80832	10.2776	17.8319	24.8763	35.1414	108.663	206.994	208.942	179.104	1036.16	771.689	648.051	706.897	649.843	490.36	197.4	23.2243	9.49704	1.42277	0.0066009	20.5866	919.697	0.0520848	9.59329	0.992191	0.0521975	0.955064	19.0084	6.85904e-13	3.14433e-11	yes
ENSG00000177732	SOX12	1.07561	0.711254	1.89126	3.36542	5.37032	16.3248	43.4627	62.9362	68.9193	99.3732	88.8572	66.1393	94.3712	82.2864	75.0299	38.7365	4.49971	1.64697	0.284199	0.00378424	30	97.4935	0	0	1.03157	0.0542952	0.955023	18.9993	6.91253e-13	3.15501e-11	yes
ENSG00000197147	LRRC8B	0.860491	2.27601	4.32289	6.2451	8.79436	21.5211	27.088	31.0974	31.4134	409.015	260.417	245.754	248.661	257.697	188.986	27.4463	2.56435	2.91995	0.222195	0.00741059	28.7941	354.789	2.96826	0	1.00788	0.0531286	0.954894	18.9707	7.08455e-13	3.21947e-11	yes
ENSG00000163320	CGGBP1	0.245855	0.569003	1.3895	4.1634	7.06432	9.47297	19.8502	30.8243	25.1912	65.1687	68.5957	55.4148	51.5956	38.6691	41.6584	27.8837	2.83046	1.74766	0.136291	0.00459575	17.6193	65.326	0.407441	0	1.0054	0.0530171	0.954862	18.9637	7.12674e-13	3.22462e-11	yes
ENSG00000072110	ACTN1	12.1698	12.9448	20.1091	40.3503	53.0905	101.811	186.642	277.145	385.084	196.526	204.532	188.006	225.654	178.549	186.119	154.919	104.751	46.2482	0.880647	0.00162873	17.1809	211.208	10	6.83981e-05	1.00127	0.052829	0.954814	18.9531	7.19221e-13	3.24021e-11	yes
ENSG00000138346	DNA2	0.430246	0.640129	0.771944	1.07555	1.73004	3.17299	4.76548	4.33101	4.58022	11.7616	7.3377	7.76603	8.08693	5.09312	4.74816	1.42152	0.762048	0.424328	0.0408845	0.00992146	30	9.83972	0.626212	0.673419	1	0.052839	0.954688	18.9255	7.36478e-13	3.30372e-11	yes
ENSG00000164284	GRPEL2	0.491709	0.817942	3.12637	5.82876	11.4975	19.7277	38.4822	50.4504	60.8391	37.445	32.4752	39.7405	25.7741	27.5415	12.3855	2.56968	0.677376	1.50672	0.341423	0.00618121	30	37.6771	0.78077	0	1.03689	0.0548182	0.95464	18.9151	7.43054e-13	3.31898e-11	yes
ENSG00000136270	TBRG4	1.59806	2.41826	4.63167	8.18802	14.2728	20.0496	46.4366	82.7183	85.0365	91.9323	92.4077	68.5004	79.7343	75.0209	75.5227	57.8451	35.2236	12.8881	0.259349	0.00240628	29.1604	82.5705	3.43889	6.27863	1.01163	0.0535329	0.954559	18.8973	7.54523e-13	3.35455e-11	yes
ENSG00000186660	ZFP91	0.583905	1.20913	2.47022	3.33072	5.65866	11.3124	34.0392	46.2754	39.7528	127.637	103.012	119.648	103.688	103.021	97.4493	50.3001	7.70515	2.91995	0.182602	0.003837	29.723	126.568	1.91433	0	1.03432	0.0547464	0.954538	18.8929	7.57438e-13	3.35455e-11	yes
ENSG00000006194	ZNF263	0.0307318	0.39119	1.11932	3.19194	5.58658	9.88684	20.4952	23.2548	22.0801	23.5831	21.9184	26.9678	17.3798	13.469	11.3777	2.62435	2.21357	0.453096	0.176196	0.00771587	30	25.1707	0.469015	0.461893	1	0.0529471	0.95451	18.8868	7.6143e-13	3.358e-11	yes
ENSG00000197217	ENTPD4	0.491709	0.426753	0.849139	1.04085	2.19859	3.21897	8.6352	14.5537	15.0802	23.0431	24.8298	22.018	27.1693	22.038	17.8952	16.8669	6.09638	4.52017	0.0460588	0.00237868	30	25.4408	0.533545	0	1.00618	0.053338	0.954406	18.8642	7.7639e-13	3.40959e-11	yes
ENSG00000104447	TRPS1	0.983419	4.7654	11.8879	13.9127	21.4453	38.4437	105.199	85.0984	91.1723	107.954	103.107	88.6693	82.43	84.7244	45.2419	13.7778	2.33453	2.46686	0.72103	0.00766923	25.5425	113.755	2.87435	0.681508	1	0.0531338	0.954204	18.8204	8.06296e-13	3.52611e-11	yes
ENSG00000131931	THAP1	0.921955	0.711254	0.849139	2.70621	4.46926	7.8175	17.9512	22.4354	24.4566	38.2251	30.3686	38.2328	23.977	27.4932	23.6736	2.81571	0.6048	0.848656	0.14418	0.00612406	30	38.0279	0.449176	0	1.01648	0.0540613	0.95412	18.8024	8.18916e-13	3.55477e-11	yes
ENSG00000103351	CLUAP1	0.553173	1.38695	1.00353	1.04085	4.00071	8.92115	13.329	23.1767	28.043	53.2871	54.4647	52.9683	52.0921	60.2484	39.9562	33.7339	7.94707	2.86242	0.0980061	0.00345967	29.9705	58.4056	1.58649	2.40418	1.01543	0.0540083	0.954115	18.8014	8.19651e-13	3.55477e-11	yes
ENSG00000145817	YIPF5	2.45855	5.29884	8.337	17.2781	35.2856	65.2072	139.202	220.92	218.554	3681.73	2308.01	2574.11	2739.55	2291.13	2181.87	1318.16	189.665	33.824	0.985078	0.00415218	24.9311	3126.6	2.47213	0	1.02154	0.0544244	0.953968	18.7699	8.42335e-13	3.63767e-11	yes
ENSG00000022840	RNF10	18.101	20.7331	24.3934	37.54	56.6948	122.137	238.489	378.241	614.786	187.705	201.716	172.417	195.813	174.349	174.898	148.577	111.223	67.6911	1.14786	0.00103418	10.0866	179.074	1.36761	9.96447	1.09709	0.0584639	0.953946	18.7652	8.45727e-13	3.63767e-11	yes
ENSG00000105576	TNPO2	1.41366	2.91614	4.05271	12.7331	17.0481	60.0568	104.626	139.06	168.69	375.89	255.021	205.416	221.35	218.521	152.904	83.3778	22.9824	11.1584	1.02025	0.00674217	29.9905	301.821	0.0600685	9.99509	1.00635	0.0537202	0.953796	18.7332	8.69501e-13	3.7246e-11	yes
ENSG00000086475	SEPHS1	1.56732	2.13376	3.08778	3.4695	5.51449	12.2321	34.7558	55.2106	60.1046	93.9725	103.533	93.1639	94.1111	113.087	85.5565	47.129	13.7169	5.8435	0.216031	0.0031667	30	109.155	0.701712	0	1.02528	0.054854	0.953597	18.6912	9.0188e-13	3.84753e-11	yes
ENSG00000092140	G2E3	0.0921955	0.177814	0.308778	0.48573	1.26149	2.16131	7.81109	11.3933	12.574	19.6226	14.3203	18.8604	13.1472	14.5794	9.42914	3.44446	1.14912	0.740776	0.0648703	0.00541663	30	18.6275	0	0	1.03326	0.0553468	0.953492	18.6688	9.19578e-13	3.90708e-11	yes
ENSG00000012048	BRCA1	2.39708	2.6672	4.24569	6.52266	9.40708	15.0372	29.202	44.5586	57.1663	246.933	182.164	155.918	165.238	166.769	153.509	110.496	30.4335	14.4272	0.187866	0.00331254	29.129	206.627	2.71391	0	1.0086	0.0540509	0.953451	18.6603	9.2646e-13	3.92039e-11	yes
ENSG00000167685	ZNF444	0.184391	0.569003	1.08072	2.28987	4.18092	16.1868	28.9512	41.9054	45.8022	138.979	151.062	84.4307	108.393	111.855	92.634	43.7939	7.52371	3.63915	0.219448	0.00463068	29.5129	137.933	0	0	1.01346	0.0543325	0.953416	18.6529	9.32423e-13	3.92971e-11	yes
ENSG00000140259	MFAP1	0.122927	0.497878	0.656153	2.60213	3.02757	8.18538	22.6092	34.8822	32.1912	11.9416	14.8174	13.5408	11.5156	14	8.9364	5.93213	1.37894	0.999688	0.150774	0.00403913	30	14.504	0	0.141112	1.00262	0.0537762	0.953375	18.6444	9.39365e-13	3.94307e-11	yes
ENSG00000264522	OTUD7B	0.368782	0.960193	1.00353	2.67152	2.84735	9.65691	21.9284	20.0553	24.8455	23.0431	25.4453	22.4731	17.2616	21.5552	14.9164	2.89772	0.713664	0.73718	0.147859	0.00612971	30	26.0901	0.456938	0	1.00553	0.0539582	0.953332	18.6353	9.46789e-13	3.95834e-11	yes
ENSG00000168061	SAC3D1	12.6615	10.0998	11.9265	18.9088	23.788	54.8145	161.668	194.856	200.363	469.623	374.128	291.212	367.459	389.877	247.33	157.817	40.3764	15.675	0.963813	0.00452794	28.3882	421.309	5.94109	7.51981	1.00978	0.0542086	0.953295	18.6276	9.53222e-13	3.96935e-11	yes
ENSG00000105723	GSK3A	0.921955	1.45807	2.43162	4.05932	7.74913	28.3729	42.7819	92.0046	99.8142	219.629	240.771	213.722	230.407	215.504	205.94	154.017	29.9376	6.87196	0.345405	0.0030254	29.9737	238.529	0.00525618	9.99885	1.04322	0.0560529	0.953217	18.6114	9.66802e-13	4.00993e-11	yes
ENSG00000139636	LMBR1L	0	0.889068	0.578958	1.80414	0.901061	5.88612	10.6417	11.9005	12.0987	70.6294	53.0208	52.9399	61.1722	61.1657	39.4411	11.8643	1.79021	0.708412	0.0685841	0.00534346	30	68.9095	0.451606	0	1.0173	0.0547415	0.953085	18.5838	9.90396e-13	4.09155e-11	yes
ENSG00000173141	MRPL57	0.399514	0.853505	1.4281	1.90823	4.46926	9.61093	20.4235	39.7204	56.5182	28.6838	23.954	30.3245	24.3317	21.2414	22.0163	17.9057	10.6808	4.90494	0.133078	0.00173626	30	26.8904	0	0	1.0587	0.0570104	0.95302	18.5704	1.00205e-12	4.12341e-11	yes
ENSG00000100304	TTLL12	1.81318	2.84502	1.27371	2.25518	3.64029	6.254	9.5668	19.2749	29.0801	114.135	115.202	94.5863	107.897	106.883	104.392	85.7015	49.9323	30.8033	0.0634207	0.00183061	28.7373	105.845	1.45964	9.50727	1.02225	0.0550623	0.952996	18.5653	1.00656e-12	4.12572e-11	yes
ENSG00000180423	HARBI1	0.0614637	0.106688	0.0385972	0.173475	0.180212	0.689779	1.3974	1.48269	1.20987	48.1864	33.0196	26.3419	23.7169	23.5587	12.296	1.28484	0.616896	0.183396	0.0172487	0.0131997	30	43.6772	0	0.61356	1.00686	0.0542895	0.952903	18.5461	1.02362e-12	4.17925e-11	yes
ENSG00000125037	EMC3	0.491709	0.604566	1.46669	1.83884	2.84735	4.64451	8.70686	17.5972	27.3085	91.5122	70.5366	82.4963	75.5726	71.1588	68.4228	62.4924	32.9858	22.8706	0.0603343	0.00171714	30	83.2087	0.430688	0	1.00724	0.0544281	0.952708	18.5059	1.06031e-12	4.3122e-11	yes
ENSG00000184677	ZBTB40	0.276586	0.853505	1.04212	4.57974	3.78446	11.0365	41.492	46.5876	41.8701	27.7237	21.658	17.4949	16.4576	17.0173	9.13798	2.37832	0.798336	1.00328	0.302138	0.00660262	30	24.0296	0	0	1.0406	0.0564143	0.952413	18.4456	1.11795e-12	4.52537e-11	yes
ENSG00000182512	GLRX5	3.25757	3.30733	5.4808	7.21656	11.2452	27.6372	88.6452	188.535	308.603	217.109	245.127	208.744	227.238	235.708	205.067	177.171	111.525	57.9711	0.639393	0.00149176	29.998	225.761	0.0952262	9.98914	1.08136	0.0586354	0.952396	18.4422	1.12138e-12	4.52537e-11	yes
ENSG00000108433	GOSR2	8.42052	11.9846	6.83171	12.3514	29.4106	43.778	103.622	194.778	213.412	329.684	376.377	298.864	312.647	368.467	316.895	204.699	90.0789	44.5796	0.672907	0.00257521	29.8499	357.919	1.71958	9.46369	1.00739	0.0546464	0.952359	18.4346	1.12883e-12	4.53582e-11	yes
ENSG00000114126	TFDP2	2.18196	2.80945	3.55094	4.892	12.6509	9.10509	20.0294	41.8664	57.5984	114.975	108.456	101.783	103.877	85.5209	99.4651	67.4404	26.6717	11.9999	0.152792	0.00252458	30	113.659	2.20072	0	1.02238	0.0554713	0.95234	18.4308	1.13265e-12	4.53582e-11	yes
ENSG00000100348	TXN2	2.30489	0.853505	1.65968	3.95523	4.03675	9.33502	14.4756	33.8677	66.586	111.975	104.929	114.215	107.849	109.152	99.5995	88.1072	57.7221	37.6214	0.126083	0.0013577	30	114.621	0	0	1.02242	0.0555239	0.952257	18.414	1.14956e-12	4.57156e-11	yes
ENSG00000213246	SUPT4H1	7.89808	8.3928	11.6564	15.4046	27.5725	52.1473	155.899	261.109	417.059	761.321	736.752	569.68	699.141	661.188	611.796	477.632	241.763	159.63	0.957634	0.00204798	13.2756	723.458	5.72871	9.90961	1.05126	0.0570924	0.952253	18.4132	1.15033e-12	4.57156e-11	yes
ENSG00000130772	MED18	0.368782	0.497878	1.69828	3.95523	7.35266	15.4511	24.8307	22.0452	22.5554	40.8054	26.2974	29.2151	33.0098	24.138	13.371	0.054674	0.217728	0.276892	0.221042	0.00925806	23.2347	39.1381	0.433315	0	1.00692	0.0548277	0.952015	18.3651	1.20021e-12	4.74062e-11	yes
ENSG00000135052	GOLM1	1.65952	0.995756	2.31583	3.60828	3.74841	6.16203	13.759	26.2201	28.4319	86.5315	94.6327	91.9976	80.491	97.083	84.0559	70.0647	42.3118	36.1254	0.0724028	0.00166343	24.4212	84.8828	0.565379	10	0.978881	0.0533174	0.951987	18.3595	1.20617e-12	4.74062e-11	yes
ENSG00000161202	DVL3	0.153659	0.462315	0.69475	0.728595	2.05442	3.81678	8.74269	14.9829	14.9937	13.0817	11.5746	11.9477	12.2013	11.3207	12.6991	8.50181	4.13683	2.63227	0.0479545	0.0024621	29.988	12.2746	0.426693	1.02586	1	0.0544687	0.951986	18.3592	1.20647e-12	4.74062e-11	yes
ENSG00000124831	LRRFIP1	3.25757	6.75692	10.4598	13.1147	15.1018	38.1678	69.4757	120.254	147.042	683.491	459.482	485.021	494.107	511.412	454.234	278.236	63.5766	19.9938	0.54666	0.00362246	29.6296	585.526	0.0550705	9.49747	1.00284	0.0548245	0.951648	18.2918	1.28067e-12	5.01331e-11	yes
ENSG00000139793	MBNL2	0.122927	1.99151	1.08072	4.1634	2.30672	10.6226	32.2476	39.9155	37.5491	49.6866	45.2097	49.8391	40.8839	50.4484	33.17	11.0168	2.24986	2.12883	0.205998	0.00486824	30	53.7629	0.0822272	0	1.01183	0.0553333	0.95162	18.2862	1.2871e-12	5.01969e-11	yes
ENSG00000132773	TOE1	0.706832	0.462315	2.54742	4.75322	4.7576	10.7606	20.316	28.3661	26.0554	72.0096	50.2987	65.8833	54.3385	42.1691	49.3406	18.8352	3.50784	0.942152	0.135649	0.00470613	17.4354	66.8308	0.584577	0	1.01231	0.0554078	0.951539	18.2701	1.30556e-12	5.07276e-11	yes
ENSG00000141526	SLC16A3	10.3259	10.3843	22.1934	30.15	43.9357	133.357	204.343	600.761	726.353	2984.14	3170.98	2765.76	3318.34	2761.58	2709.72	2281.19	1066.73	432.243	1.91286	0.00209447	29.8579	3228.54	0.102232	9.84939	1.03021	0.0564089	0.951505	18.2633	1.31346e-12	5.08456e-11	yes
ENSG00000092203	TOX4	2.82733	4.33865	4.40008	6.21041	11.4615	21.2452	73.9904	143.508	181.912	175.643	142.091	144.909	140.812	169.063	143.856	106.696	37.9935	16.7178	0.503037	0.00229557	30	167.315	0	0	1.05129	0.0576535	0.951359	18.2347	1.34736e-12	5.137e-11	yes
ENSG00000107341	UBE2R2	2.7966	3.20064	6.36854	6.86961	8.5781	26.4875	69.3324	90.678	81.018	107.714	124.481	108.639	116.244	114.824	96.5759	54.0452	17.7569	7.88243	0.345658	0.00343428	26.984	127.156	2.99786	0	1.00567	0.0551537	0.951356	18.2339	1.34829e-12	5.137e-11	yes
ENSG00000119559	C19orf25	2.24342	1.35138	6.21415	15.7515	24.1484	46.997	125.372	206.406	340.06	217.769	242.381	182.288	206.122	182.797	159.332	90.6495	42.2876	9.14822	0.962389	0.0028865	30	209.23	0	10	1.09612	0.0601304	0.951331	18.229	1.35413e-12	5.137e-11	yes
ENSG00000124164	VAPB	1.90537	3.23621	5.90537	8.56967	13.4438	27.7291	78.9351	123.648	117.444	154.821	123.037	142.69	119.152	105.169	122.825	82.5031	32.2237	10.04	0.428984	0.00290754	29.8736	145.083	2.80455	0	1.00552	0.0551611	0.95133	18.2288	1.35443e-12	5.137e-11	yes
ENSG00000100281	HMGXB4	0.0614637	0.640129	2.66321	3.81645	5.2622	14.7613	26.3714	38.5108	38.1541	85.8114	55.2694	72.6821	49.1837	51.0277	21.9267	5.13936	2.44339	1.45998	0.322245	0.00915155	30	80.159	0	0	1.01461	0.0556729	0.951308	18.2245	1.35959e-12	5.137e-11	yes
ENSG00000164180	TMEM161B	0.706832	5.40553	5.78958	9.09009	13.4078	20.3715	40.417	48.1093	42.3454	39.9653	31.9072	32.7994	31.0472	37.2208	22.9793	5.11202	1.39104	0.999688	0.268575	0.00598075	19.57	40.6734	3.0562	0	1.00174	0.0549713	0.9513	18.2229	1.36155e-12	5.137e-11	yes
ENSG00000163607	GTPBP8	3.25757	0.889068	4.05271	6.2451	5.947	13.4737	29.9903	62.4289	76.0489	219.809	198	225.13	245.635	185.114	175.279	106.888	26.9741	4.9481	0.261108	0.00338735	25.9016	237.762	0	0	1.03372	0.0567317	0.951291	18.2212	1.36354e-12	5.137e-11	yes
ENSG00000108578	BLMH	2.61221	5.58335	5.5194	8.81253	14.8134	32.7415	83.4497	139.099	186.622	154.461	185.881	143.316	179.331	151.563	143.878	120.201	78.4305	42.9255	0.463441	0.00181253	28.2523	162.186	0.198659	9.81152	1.01015	0.0554448	0.95128	18.2189	1.36633e-12	5.137e-11	yes
ENSG00000102870	ZNF629	0.276586	0.39119	1.27371	1.63067	3.5682	8.18538	15.7655	20.6015	21.6048	20.7028	14.6991	21.5913	15.8665	14.8207	5.9352	2.48767	0.749952	0.194184	0.144477	0.00687587	30	20.6608	0.0760304	0	1.01868	0.0560976	0.950973	18.159	1.44127e-12	5.39934e-11	yes
ENSG00000136938	ANP32B	6.33076	7.96605	7.29487	12.629	21.4092	33.7992	107.134	245.697	257.702	376.19	360.305	390.179	384.626	333.901	363.817	305.874	184.549	85.5381	0.660122	0.0016085	29.8403	396.483	0.0787928	0	1.0125	0.055786	0.950926	18.1497	1.45329e-12	5.42494e-11	yes
ENSG00000103852	TTC23	0.276586	0.426753	0.192986	1.63067	1.58587	2.75912	5.87624	7.45245	8.12341	41.7056	31.2207	27.2807	25.6086	16.4138	18.052	7.13496	1.05235	0.690432	0.0676257	0.00953737	29.957	36.1405	0.144951	1.67185	0.999837	0.0551274	0.950859	18.1368	1.47013e-12	5.46825e-11	yes
ENSG00000053371	AKR7A2	0.860491	0.569003	0.771944	1.04085	3.89258	5.74816	13.544	32.0729	54.7034	107.234	103.414	102.466	97.5634	90.4209	93.1267	83.1865	50.3919	52.8396	0.10618	0.00129001	29.5825	94.2091	0.0062258	9.99786	1.01724	0.0561058	0.950828	18.1308	1.47808e-12	5.47833e-11	yes
ENSG00000162062	TEDC2	0.153659	0.711254	0.385972	1.04085	3.42403	7.58757	10.9284	22.6305	28.0862	58.8078	51.4823	44.3773	55.6863	35.4829	38.814	25.15	11.2856	7.2819	0.0967953	0.003354	27.6614	53.1418	0	1.42917	1.00448	0.055478	0.9507	18.106	1.51125e-12	5.58148e-11	yes
ENSG00000196235	SUPT5H	3.22684	7.64598	4.05271	6.59205	6.84807	17.9343	35.8307	81.1576	80.1538	175.523	173.028	146.36	142.112	138.19	151.18	122.88	72.697	45.9569	0.204224	0.00165797	30	166.842	3.60489	0	1.00433	0.055562	0.950544	18.0759	1.55261e-12	5.70075e-11	yes
ENSG00000157823	AP3S2	0.0921955	0.355627	0.926333	1.35311	2.48693	4.04671	10.1401	19.7822	27.2221	37.0849	41.4935	37.4363	42.8938	42.1691	31.3782	22.4984	5.17709	2.57474	0.0829146	0.00296244	30	43.4883	0	0	1.04418	0.0577706	0.950537	18.0745	1.55445e-12	5.70075e-11	yes
ENSG00000143543	JTB	19.484	17.1057	13.316	25.3967	35.2495	68.9779	128.417	278.589	423.454	594.319	676.82	621.652	661.142	680.571	610.654	553.82	421.642	328.588	0.791805	0.000907642	30	666.245	8.92706e-08	0	0.990583	0.0548459	0.950467	18.0612	1.57313e-12	5.74908e-11	yes
ENSG00000109184	DCUN1D4	0.491709	1.13801	3.24217	4.40627	9.80355	15.635	48.1206	63.7555	49.1293	135.078	117.19	137.911	109.15	118.228	87.2587	39.994	8.53978	5.20341	0.285975	0.00465862	30	140.941	1.27539	0	1.00784	0.0558366	0.950408	18.0499	1.5892e-12	5.78756e-11	yes
ENSG00000167325	RRM1	33.7743	42.9598	55.7344	83.8231	101.892	160.167	389.372	575.751	680.076	1555.47	1880.82	1771.11	1712.99	1709.14	1634.06	1302.47	925.489	581.782	1.67619	0.00143662	28.2128	1810.44	1.22708	5.29691	0.940452	0.0521505	0.950322	18.0334	1.61285e-12	5.8533e-11	yes
ENSG00000175354	PTPN2	0.768296	1.56476	5.09483	5.41242	6.23534	10.9905	32.4268	48.2654	42.8639	168.082	142.564	157.796	132.323	145.262	134.584	98.3312	28.4135	5.35085	0.160149	0.00289498	15.8826	165.882	1.16656	0	1.02589	0.0569126	0.950282	18.0257	1.62407e-12	5.87364e-11	yes
ENSG00000101161	PRPF6	1.3522	1.92039	1.77547	3.22664	5.37032	10.2547	27.3388	37.8866	61.012	61.8682	65.7316	52.2856	65.925	55.976	46.0706	46.3909	27.5305	14.6429	0.137953	0.00173692	29.9998	63.0906	1.08372	0	1.01612	0.0564585	0.950134	17.9976	1.66562e-12	6.00313e-11	yes
ENSG00000155463	OXA1L	5.71612	5.93897	2.66321	6.48797	13.9845	19.9576	52.7786	122.595	193.449	183.384	168.767	159.559	180.348	180.021	155.458	147.729	83.16	43.9935	0.403073	0.00146851	30	183.012	0	0	1.04987	0.0586116	0.949682	17.9123	1.7988e-12	6.46083e-11	yes
ENSG00000105676	ARMC6	0.860491	0.248939	1.3895	2.1164	2.73923	10.5766	20.7818	53.884	58.4626	150.44	156.932	149.176	162.188	159.407	152.344	117.604	61.2783	22.8274	0.162121	0.0020684	29.9583	161.028	0.0161631	7.08324	1.03994	0.0580848	0.949636	17.9037	1.81282e-12	6.48889e-11	yes
ENSG00000113163	COL4A3BP	2.64294	2.59608	1.73687	9.61052	15.4983	17.6584	55.1435	90.0927	83.1785	485.465	389.892	446.618	363.439	269.404	301.217	90.1848	16.5715	8.97562	0.504665	0.00598873	29.934	462.768	0.142911	8.83562	1.01495	0.0567674	0.949504	17.8791	1.85371e-12	6.5982e-11	yes
ENSG00000170234	PWWP2A	0.307318	0.711254	1.15792	1.80414	4.90177	7.12772	14.3323	17.5972	13.3086	17.4623	18.1786	17.8078	9.88403	10.5242	5.89041	1.64022	0.9072	0.32364	0.141074	0.00942823	30	19.0323	0.493885	0.123468	1	0.0559355	0.949497	17.8777	1.85598e-12	6.5982e-11	yes
ENSG00000150776	NKAPD1	0.583905	0.92463	1.46669	2.18579	4.32509	8.36932	27.3747	38.7059	52.0244	180.444	130.848	152.163	113.997	130.49	104.348	36.7683	6.62861	2.70779	0.238531	0.00527358	30	166.328	0	0	1.03167	0.0577751	0.949384	17.8566	1.8918e-12	6.70273e-11	yes
ENSG00000165416	SUGT1	1.3522	1.13801	1.4281	2.0817	2.34276	6.43794	14.6548	28.7173	32.364	52.327	48.2158	43.3817	37.408	40.7208	42.0168	36.2762	12.6887	4.59209	0.0937616	0.00231775	30	49.1272	0.525926	0	1.02429	0.0573841	0.949347	17.8498	1.90365e-12	6.70471e-11	yes
ENSG00000122140	MRPS2	2.95026	3.05839	9.34053	19.2904	32.4382	75.7838	194.346	354.596	531.824	1114.35	934.16	741.955	868.801	880.409	728.754	473.914	112.033	44.1013	1.70621	0.00345376	30	1013.55	0	0	1.04517	0.0585568	0.949342	17.8489	1.90518e-12	6.70471e-11	yes
ENSG00000105939	ZC3HAV1	2.52001	8.00161	10.923	26.4723	34.3485	65.9429	240.46	335.594	293.22	696.453	568.388	442.095	524.066	521.888	445.835	256.94	34.401	10.8024	1.48039	0.00425965	29.8876	625.801	1.76892	7.12701	1.01929	0.0572206	0.94915	17.8133	1.96764e-12	6.87138e-11	yes
ENSG00000134291	TMEM106C	3.04245	4.65872	3.85972	4.892	7.74913	17.9343	37.0131	88.6101	129.629	422.696	349.511	361.931	378.265	376.722	338.553	312.025	268.858	215.231	0.237852	0.000830515	29.2805	375.015	0.139072	9.99997	0.996382	0.0559386	0.949143	17.8121	1.96989e-12	6.87138e-11	yes
ENSG00000119917	IFIT3	0	0.213376	0.231583	0.90207	2.09046	5.70218	9.53097	10.4568	14.8641	78.2504	54.6304	49.9529	48.7581	56.4346	45.3315	14.3246	2.1289	1.23702	0.0727566	0.00537779	29.998	68.3065	0.117442	0	1.00985	0.0566991	0.949136	17.8107	1.97227e-12	6.87138e-11	yes
ENSG00000249624	AP000295.1	0.368782	0.604566	0.308778	0.41634	0.468552	1.28759	2.75896	5.42351	7.51847	86.9516	67.6015	74.8725	72.0967	71.7864	66.8326	48.4958	21.7486	9.63009	0.0235978	0.00314739	29.9919	72.1732	0.00358584	9.99999	1.02201	0.0574278	0.949058	17.7964	1.99821e-12	6.9254e-11	yes
ENSG00000101294	HM13	4.60977	6.50798	8.22121	12.8372	20.1477	45.4335	65.9285	94.4628	131.746	247.953	224.983	203.794	240.291	184.607	198.729	154.864	115.541	93.4528	0.286306	0.00151419	3.03258	220.474	4.60974	10	0.990577	0.0556666	0.949049	17.7948	2.00103e-12	6.9254e-11	yes
ENSG00000166446	CDYL2	0.184391	0.462315	1.58249	2.39396	3.49612	7.77152	14.189	12.7979	11.2345	9.12122	10.4148	9.67198	7.63766	7.26554	3.09079	0.355381	0.133056	0.219356	0.124092	0.00973154	23.7813	11.143	0.323333	0.0833941	1	0.0562275	0.948995	17.7849	2.01915e-12	6.96507e-11	yes
ENSG00000106144	CASP2	1.53659	1.13801	2.08425	5.89815	6.55973	14.8992	38.1239	40.3447	37.3331	223.47	181.549	163.912	178.102	174.469	150.194	81.0815	13.1363	2.80488	0.179707	0.00408832	29.3136	210.284	2.51248	0	1.01895	0.0573202	0.948949	17.7765	2.03465e-12	6.97951e-11	yes
ENSG00000154174	TOMM70	3.41123	4.08971	6.09836	11.0677	16.111	35.3167	109.964	135.042	138.271	121.636	141.854	122.863	130.857	123.707	109.521	87.8338	28.3772	9.74156	0.538718	0.00327087	28.5761	132.663	3.86474	9.72223	1.01139	0.0568983	0.948943	17.7754	2.03669e-12	6.97951e-11	yes
ENSG00000162521	RBBP4	3.81075	2.80945	3.93692	7.49412	15.2099	22.3029	59.2282	104.412	160.783	167.242	181.076	171.479	168.785	163.704	165.335	155.137	91.7361	46.2482	0.346047	0.00145609	29.743	174.305	0.104571	7.29966	1.02504	0.0576929	0.948898	17.7671	2.05209e-12	7.00929e-11	yes
ENSG00000160214	RRP1	0.184391	0.106688	0.115792	0.312255	1.26149	2.48321	5.98373	7.41343	7.86415	27.1236	24.9482	15.3329	19.2242	23.0277	15.0284	8.74784	2.55226	0.650876	0.0382334	0.00451316	30	25.0715	0.0697834	0	1.00296	0.0564939	0.948824	17.7535	2.07767e-12	7.03481e-11	yes
ENSG00000132846	ZBED3	3.93367	3.16508	3.04918	2.01231	3.5682	5.38028	10.3909	19.9773	22.5122	35.4047	29.8005	35.7863	30.3615	24.3552	26.4957	14.5433	2.74579	1.13993	0.0759739	0.0036499	29.8778	35.1245	1.97609	0	1.02833	0.0579257	0.948819	17.7526	2.07945e-12	7.03481e-11	yes
ENSG00000141564	RPTOR	0.307318	0.569003	0.96493	1.90823	6.1993	10.6226	20.961	39.6814	32.1479	61.8082	49.8017	47.1651	45.4003	55.0588	42.4647	22.7991	2.34662	1.12555	0.15918	0.00404691	30	58.918	0.000112587	0	1.01205	0.0570094	0.948818	17.7524	2.07975e-12	7.03481e-11	yes
ENSG00000179604	CDC42EP4	0.430246	0.711254	1.62108	4.23279	7.71308	18.0262	26.0848	32.385	30.7652	60.008	64.0037	74.0191	56.3721	59.2347	50.7516	16.4569	1.42733	0.517824	0.164075	0.00466275	11.171	71.8776	0.43022	0	1.02159	0.057657	0.948631	17.7184	2.14528e-12	7.23306e-11	yes
ENSG00000100554	ATP6V1D	2.42781	2.70277	2.08425	3.33072	6.27139	8.69122	19.2769	38.0426	42.7775	67.9891	71.2467	62.8963	55.2134	60.2484	66.6759	51.0108	24.6758	13.6756	0.10834	0.00186083	29.5733	69.499	1.95251	0	1.01686	0.0574502	0.948529	17.6998	2.182e-12	7.31076e-11	yes
ENSG00000121897	LIAS	0.921955	2.56052	0.810541	4.26749	8.18164	11.0365	23.6124	45.261	44.938	135.438	134.398	112.821	98.391	72.8243	84.2799	57.353	21.7123	8.51892	0.212721	0.00467412	30	120.159	0.535998	8.62204	1.00326	0.0566823	0.948528	17.6997	2.18232e-12	7.31076e-11	yes
ENSG00000171865	RNASEH1	2.58147	3.55627	6.71591	8.15333	10.1279	17.5204	30.2053	48.6946	49.8207	49.8666	64.3824	62.0429	61.2431	53.6105	53.4168	35.046	9.0599	4.63524	0.160039	0.00287683	28.7214	64.2215	4.80689	0	1.02174	0.0577666	0.94846	17.6874	2.20696e-12	7.33368e-11	yes
ENSG00000168092	PAFAH1B2	2.24342	1.67145	4.86325	5.10017	8.65019	24.2802	65.7852	84.6302	68.1848	289.659	257.743	258.612	219.861	267.304	208.919	108.036	15.3256	6.42605	0.364998	0.0043206	28.9602	284.347	2.34144	9.6465	1.03261	0.0583829	0.948458	17.6869	2.20783e-12	7.33368e-11	yes
ENSG00000102096	PIM2	0.460977	1.38695	2.12285	5.72468	10.9929	29.7985	54.0327	75.461	96.4438	119.056	139.961	96.2931	140.079	108.887	89.9687	32.8317	4.02797	2.41292	0.418932	0.00450268	30	136.745	0.115904	0	1.02591	0.0580079	0.948451	17.6858	2.21021e-12	7.33368e-11	yes
ENSG00000178074	C2orf69	1.32147	1.70701	1.85267	4.57974	8.25372	12.554	29.4528	26.8054	20.6542	47.3463	36.9252	30.7228	29.4156	19.6001	5.28569	3.28044	0.78624	0.517824	0.322511	0.0135715	30	46.7809	0.915135	0.0695957	1	0.0566339	0.948294	17.6573	2.26857e-12	7.50353e-11	yes
ENSG00000151353	TMEM18	1.81318	0.92463	3.82112	5.82876	7.1364	10.7146	28.5212	56.5762	51.6355	266.015	181.123	190.965	188.34	189.097	152.076	110.441	41.9005	15.7685	0.203314	0.00358631	28.9087	221.177	2.47836	5.59803	1.02538	0.0580868	0.948267	17.6525	2.27842e-12	7.51232e-11	yes
ENSG00000108819	PPP1R9B	0.706832	0.320064	0.347375	0.867375	1.51378	4.00072	11.3225	15.8413	15.8147	18.6625	17.0187	18.3199	19.5316	16.8	17.5369	10.8801	1.83859	0.525016	0.0605276	0.00315145	29.1328	20.3056	0.252422	0	1.02537	0.0581289	0.948195	17.6396	2.3056e-12	7.57803e-11	yes
ENSG00000071243	ING3	0.122927	2.56052	2.7404	4.54505	8.03747	8.92115	23.7199	25.7519	21.4752	108.314	102.136	103.12	66.4689	86.9692	47.2129	21.1042	4.29408	2.36257	0.158025	0.00681011	28.4712	112.022	1.89884	0.463134	1.00008	0.056745	0.948109	17.6241	2.33865e-12	7.66255e-11	yes
ENSG00000141905	NFIC	6.42295	12.8026	25.7057	34.5909	57.0912	112.296	214.984	469.153	581.817	392.932	284.135	343.64	288.93	272.301	297.656	154.071	35.913	10.3205	1.79692	0.00282457	29.7554	346.21	0.708801	0.0757789	1.06962	0.0607537	0.948006	17.6058	2.37822e-12	7.76785e-11	yes
ENSG00000072042	RDH11	1.96684	3.02283	3.58954	10.9289	13.2997	23.0386	76.4986	174.138	196.172	567.736	535.605	499.928	549.769	496.953	524.224	407.185	121.686	54.2241	0.578347	0.00242805	29.776	575.264	0.0955686	9.98826	1.04437	0.0594169	0.947844	17.5769	2.44215e-12	7.93119e-11	yes
ENSG00000169375	SIN3A	0.0614637	1.20913	2.23864	3.4695	3.64029	6.5759	16.088	17.5581	17.111	56.3475	36.7595	40.793	33.2936	30.7518	30.1688	13.9419	2.18938	1.04284	0.100138	0.00570648	28.9178	47.3457	1.19569	0.510463	1.00102	0.0569691	0.947813	17.5713	2.45481e-12	7.93119e-11	yes
ENSG00000009335	UBE3C	1.04488	1.35138	2.7018	3.57359	4.93782	7.17371	18.8111	23.1377	24.9319	21.6629	27.5519	24.2937	21.5888	24.6932	18.052	11.8369	9.22925	4.10304	0.0978473	0.00373326	29.3465	22.055	1.77079	3.98241	0.99995	0.0569099	0.94781	17.5708	2.45602e-12	7.93119e-11	yes
ENSG00000104889	RNASEH2A	3.31904	2.88058	1.81407	4.23279	4.82969	8.50728	15.443	38.1597	58.6354	61.5682	52.8314	45.2592	47.5758	50.3036	45.4659	35.6748	25.8008	15.2542	0.123154	0.00155448	30	53.8172	0.888046	0	1.02936	0.0585904	0.947798	17.5687	2.46058e-12	7.93119e-11	yes
ENSG00000160471	COX6B2	3.93367	4.58759	3.51235	5.82876	9.0827	17.5664	27.0522	43.5442	64.0366	76.7502	60.9029	47.222	58.6894	51.6312	39.7547	22.3617	5.7577	3.96998	0.228042	0.00416911	30	66.4974	2.49337	0	1.02006	0.058069	0.947784	17.5663	2.46617e-12	7.93119e-11	yes
ENSG00000171169	NAIF1	0.0921955	0.497878	0.385972	0.97146	2.09046	4.18466	8.27689	7.3354	6.99996	19.2026	10.5805	12.1753	9.43475	7.12071	5.73363	0.82011	0.266112	0.075516	0.0947235	0.0129205	30	16.4924	0.0737059	0.33822	1	0.0570045	0.94765	17.5425	2.52076e-12	8.08188e-11	yes
ENSG00000128626	MRPS12	22.9259	27.49	29.6427	38.8237	50.099	89.1655	178.401	274.492	385.257	395.993	481.969	356.441	451.473	424.515	350.558	247.728	84.1277	29.5987	1.13917	0.0028455	17.8079	447.801	5.87113	9.89158	1.02166	0.0582568	0.94762	17.5371	2.53328e-12	8.09721e-11	yes
ENSG00000006712	PAF1	1.99757	0.711254	1.27371	1.31841	2.73923	5.0124	10.2476	16.1925	18.4073	88.1518	56.1689	67.6185	57.7672	62.0588	55.6118	39.2286	14.0314	6.64541	0.0642205	0.00301002	29.9844	73.2452	0.368229	0.122857	0.975588	0.0556465	0.94759	17.5319	2.54546e-12	8.11016e-11	yes
ENSG00000132612	VPS4A	0.829759	1.28026	0.617555	1.31841	1.4417	4.87444	9.53097	17.9093	19.2715	29.764	29.9189	25.773	28.1151	32.4897	27.5483	18.1518	14.7571	5.20341	0.0512575	0.00188776	28.937	31.1129	0.676917	0	1.01082	0.0576752	0.947558	17.5261	2.55899e-12	8.11016e-11	yes
ENSG00000099622	CIRBP	7.25271	8.89068	21.0741	57.9407	101.315	121.263	179.369	327.869	350.603	1386.42	1508.87	1465.16	1457.75	1522.17	1209.1	957.615	338.918	142.628	1.17771	0.0026348	29.8793	1579.05	0.0116469	9.98235	0.949405	0.0541729	0.947554	17.5255	2.56061e-12	8.11016e-11	yes
ENSG00000125170	DOK4	1.22927	1.56476	0.926333	3.64298	6.92015	13.9795	37.5864	61.0633	55.2651	81.0108	71.294	61.0473	83.8251	63.1209	58.6129	36.5222	12.5436	5.55942	0.267547	0.00422801	29.9831	70.6485	0	9.99386	1.03674	0.0591992	0.947481	17.5127	2.59091e-12	8.18133e-11	yes
ENSG00000166123	GPT2	1.10635	3.20064	3.93692	4.57974	6.63181	15.9109	46.2933	62.8971	101.11	49.9267	57.4234	48.5306	48.2851	41.276	32.1173	35.2101	11.9992	4.20013	0.262824	0.00229844	30	51.4894	0.487601	0	1.06099	0.0606007	0.947454	17.5078	2.6026e-12	8.1935e-11	yes
ENSG00000171453	POLR1C	2.73513	2.63164	11.0774	23.1069	23.1753	67.2305	167.544	192.827	147.388	183.865	216.699	187.238	183.067	155.159	97.2702	27.337	12.1807	9.48625	1.28943	0.00718187	29.9649	210.869	0.00756888	9.99611	1.0059	0.0575102	0.947357	17.4909	2.64363e-12	8.29767e-11	yes
ENSG00000114982	KANSL3	3.07318	2.84502	7.87383	14.4331	23.9322	51.6415	88.7168	81.6258	93.4192	134.298	130.185	112.252	121.871	115.573	107.371	56.4236	14.8539	4.71076	0.405738	0.00394106	7.96469	140.414	4.67314	2.20608e-09	1.00138	0.0573138	0.947248	17.4718	2.69052e-12	8.41955e-11	yes
ENSG00000137806	NDUFAF1	0.184391	0.284502	0.27018	1.04085	0.576679	1.8854	5.08796	7.80362	8.5555	61.2082	42.8427	43.7799	36.9823	40.0691	39.1276	25.3414	11.4791	5.89744	0.0323861	0.00334645	30	48.5754	1.69936e-05	2.01308	0.98969	0.0566863	0.947175	17.4591	2.72248e-12	8.48229e-11	yes
ENSG00000124766	SOX4	0.645368	3.84077	10.4984	19.6374	35.4658	74.6801	92.2641	94.97	115.975	721.716	377.489	291.297	294.204	282.994	101.346	18.3158	5.40691	2.6035	1.93214	0.0197277	30	633.322	0.0864948	10	0.984373	0.0563873	0.947165	17.4574	2.7268e-12	8.48229e-11	yes
ENSG00000150551	LYPD1	0.0921955	0.0711254	0.308778	0.104085	0.180212	0.367882	0.895768	1.48269	2.07406	10.1414	8.78157	8.84702	9.88403	7.00002	5.68884	4.75664	1.34266	0.327236	0.00715404	0.00379237	30	9.93798	0.0439644	0	1.00923	0.0578261	0.94714	17.4529	2.73813e-12	8.48299e-11	yes
ENSG00000257594	GALNT4	0.0614637	0.106688	0.115792	0.312255	0.396467	1.65547	2.72313	2.73127	3.19751	23.9432	14.5334	18.0638	12.9344	8.90692	2.93401	2.10495	0.229824	0.104284	0.0401771	0.0145777	30	22.5155	0	0.324052	1.01807	0.0583394	0.947128	17.4509	2.74326e-12	8.48299e-11	yes
ENSG00000143190	POU2F1	2.05903	10.0287	19.0284	29.2132	41.5569	49.7101	107.026	120.683	96.055	235.531	204.935	244.018	171.434	183.666	129.208	24.2753	3.87072	1.9778	0.689057	0.00656184	15.5204	249.318	10	0	1.02255	0.0586341	0.947063	17.4396	2.77211e-12	8.53872e-11	yes
ENSG00000134086	VHL	0.307318	0.78238	1.00353	2.63682	3.53216	7.54159	22.7883	28.3271	34.4813	143.479	88.0997	98.9387	103.167	78.2554	69.5875	22.3617	5.1529	1.32333	0.194652	0.00625069	30	124.027	0	0	1.01622	0.0582781	0.947051	17.4374	2.77762e-12	8.53872e-11	yes
ENSG00000104783	KCNN4	1.04488	0.995756	3.04918	3.40011	7.641	20.5554	55.6093	92.0046	131.789	230.071	196.745	140.557	177.345	174.469	146.006	116.264	57.0205	30.6307	0.368189	0.00250472	30	198.86	0	0	1.01813	0.0584089	0.947015	17.4311	2.79378e-12	8.56322e-11	yes
ENSG00000099381	SETD1A	0.245855	0.604566	0.733347	1.94292	3.17174	6.62188	10.5701	13.8514	12.1851	6.7809	7.43238	6.08766	6.12431	7.16899	5.33049	2.02294	0.072576	0.0899	0.0804417	0.00618707	29.9997	7.62569	0.727432	0.370071	1	0.0574175	0.946929	17.4163	2.83247e-12	8.65643e-11	yes
ENSG00000100401	RANGAP1	1.01415	2.45383	4.63167	6.34919	7.46079	33.6612	44.0718	91.4194	91.9068	118.096	135.629	109.578	131.661	125.059	116.173	88.7359	43.6182	25.1253	0.283172	0.00230686	13.7724	123.861	5.46481e-09	9.99998	1.0159	0.0583603	0.946878	17.4074	2.85602e-12	8.70294e-11	yes
ENSG00000140455	USP3	0.829759	2.13376	4.43868	8.84723	13.1915	17.0605	60.948	72.6517	73.802	188.845	158.494	193.724	169.707	116.707	133.531	61.4262	10.5235	8.46858	0.395455	0.00497175	29.7947	182.386	0.239286	9.96081	1.009	0.0579941	0.946826	17.3984	2.87986e-12	8.7501e-11	yes
ENSG00000180667	YOD1	0.122927	0.853505	2.47022	5.48181	10.5244	16.5547	22.5017	21.1478	16.3332	32.7644	15.7642	16.7268	4.7292	2.80001	0.627116	0	0.169344	0.783928	0.592017	0.0320237	30	31.4003	0.515108	0	1.00515	0.0578983	0.946607	17.3607	2.98258e-12	9.03591e-11	yes
ENSG00000124225	PMEPA1	10.08	31.1529	67.6995	103.565	178.302	546.489	838.295	838.967	743.767	1341	1450.33	1399.62	1321.84	1093.23	933.709	305.245	54.3957	20.0225	5.17734	0.00571319	10.7866	1546.67	4.11892	9.9543	1.0039	0.0578814	0.94651	17.3441	3.02902e-12	9.15008e-11	yes
ENSG00000103035	PSMD7	3.78002	5.33441	5.5966	12.7331	17.6968	22.4408	43.8926	117.015	163.678	618.562	484.383	541.204	541.872	469.315	448.119	354.944	150.015	42.1271	0.456319	0.00269199	29.3385	571.691	0.269182	9.60599	1.02524	0.0591553	0.946436	17.3314	3.06489e-12	9.23177e-11	yes
ENSG00000214753	HNRNPUL2	3.16538	3.94746	3.82112	6.80022	11.6057	13.8416	22.215	38.3938	48.3948	90.9721	88.3128	59.9663	77.7244	61.2864	54.3575	38.5998	20.7204	10.0688	0.176648	0.00418213	29.5845	75.7189	3.46876	9.02528	1.01025	0.0583295	0.946368	17.3198	3.09835e-12	9.28611e-11	yes
ENSG00000182224	CYB5D1	0.122927	0.39119	0.501764	0.97146	2.1265	3.26496	16.088	22.3183	28.4319	35.8248	35.6707	38.7733	35.7764	36.0863	36.2383	15.5001	3.42317	1.69731	0.0981389	0.00325214	30	40.6362	0	0	1.0495	0.0605982	0.946363	17.3189	3.1007e-12	9.28611e-11	yes
ENSG00000100836	PABPN1	36.8475	45.0935	68.9346	86.5987	141.431	286.166	409.832	932.376	1270.75	1708.13	1550.83	1546.58	1496.25	1480.87	1608.08	1310.81	650.753	259.642	3.08028	0.00181214	29.9568	1689.1	0.211597	7.9264	1.00613	0.0581595	0.946249	17.2994	3.15758e-12	9.42943e-11	yes
ENSG00000197296	FITM2	0.153659	0.355627	0.27018	0.312255	0.396467	1.33357	5.23128	11.4323	12.6604	6.48086	5.87016	5.57561	6.19525	6.20347	3.7179	2.05028	1.17331	0.640088	0.0391561	0.00262434	30	6.19374	0	0	1.09694	0.0635042	0.946096	17.2735	3.23503e-12	9.60708e-11	yes
ENSG00000152242	C18orf25	0.122927	0.889068	1.58249	2.15109	2.59506	7.86349	16.3746	16.3876	11.0617	26.8836	24.0014	21.8473	16.5758	17.0414	9.40674	1.09348	0.870912	0.740776	0.139557	0.00969121	29.6248	27.4169	0.42027	0.249675	0.99995	0.0578955	0.946085	17.2716	3.24057e-12	9.60708e-11	yes
ENSG00000137819	PAQR5	0.460977	1.13801	1.3895	1.04085	1.40566	2.43722	7.66777	10.3008	13.8703	73.6898	56.6423	52.6554	46.559	53.8277	46.6753	38.4905	10.3905	4.25766	0.0432406	0.00304684	29.7201	63.2862	0.513623	0	1.0134	0.0586786	0.946077	17.2703	3.24464e-12	9.60708e-11	yes
ENSG00000130723	PRRC2B	3.13465	5.54778	10.7686	22.6905	39.1421	72.8407	127.916	167.036	224.128	84.6113	63.625	75.8681	56.8923	56.5553	60.1359	44.532	21.2285	16.0525	0.719857	0.00298463	11.0871	64.1182	2.25601	10	1.01732	0.0589414	0.946015	17.2598	3.27673e-12	9.67469e-11	yes
ENSG00000170801	HTRA3	0.276586	0.640129	1.04212	1.21433	2.55901	5.42626	12.0391	15.9974	15.8579	28.2638	25.4453	20.1405	25.2776	26.7932	21.0756	15.6368	9.28973	6.5591	0.0619954	0.00333398	29.9925	22.1781	0.779186	5.17548	1.00003	0.0580057	0.945898	17.2401	3.33748e-12	9.82628e-11	yes
ENSG00000182087	TMEM259	4.67124	7.68155	11.8879	15.4046	37.0516	59.413	218.567	439.187	652.292	248.433	246.357	229.624	237.122	211.063	211.786	211.479	125.46	61.1752	1.30497	0.00116068	30	230.607	0	9.97943	1.12227	0.0651366	0.945835	17.2295	3.3707e-12	9.89623e-11	yes
ENSG00000188283	ZNF383	0.122927	0.248939	0.463167	0.6939	1.1894	1.97737	3.54724	5.54057	5.79009	4.86065	4.71033	4.60841	2.43554	3.45173	1.4782	1.28484	0.157248	0.028768	0.0328235	0.00607609	30	4.71072	0.184623	0	1.02165	0.0593281	0.945781	17.2204	3.39978e-12	9.95365e-11	yes
ENSG00000108848	LUC7L3	6.23856	8.46393	17.9863	37.6441	53.0184	124.804	350.568	545.98	506.46	1134.33	729.604	1013.6	706.803	682.092	631.282	308.115	70.4229	23.7839	2.68058	0.00488468	30	998.135	0	0	1.0132	0.058871	0.945722	17.2105	3.43149e-12	1.00184e-10	yes
ENSG00000165480	SKA3	5.93124	7.68155	7.29487	8.39619	9.55125	16.9226	39.8796	65.2382	88.9254	100.873	114.444	131.966	108.299	112.024	97.1806	57.0523	28.5224	14.5746	0.26723	0.00290617	30	117.185	2.13511	5.8742	1.0056	0.0585318	0.945541	17.1803	3.52985e-12	1.02409e-10	yes
ENSG00000124201	ZNFX1	0.122927	0.320064	0.540361	1.56128	2.66714	9.61093	14.5831	16.0364	13.2221	20.6428	11.8823	17.4949	11.4447	9.34141	6.11438	2.18696	0.556416	0.129456	0.159446	0.0105788	30	18.4847	0	0.446511	1.00328	0.0584111	0.945516	17.1761	3.54383e-12	1.02409e-10	yes
ENSG00000165006	UBAP1	0.737564	1.17357	3.39655	5.48181	3.74841	15.4511	30.2053	49.0847	48.3516	53.7072	66.0156	67.2487	57.7672	54.0933	57.2019	21.1862	6.56813	2.06051	0.198516	0.00364862	30	67.3665	1.20522	0	1.02289	0.0595555	0.945512	17.1755	3.54591e-12	1.02409e-10	yes
ENSG00000160209	PDXK	6.54588	3.94746	7.64225	11.7616	21.4092	55.3203	127.056	187.638	217.647	189.025	199.538	142.178	196.782	181.107	165.626	130.562	57.1536	32.3316	0.67362	0.00245963	21.6323	187.951	0.0704068	9.99715	1.00164	0.0583328	0.945486	17.1711	3.56042e-12	1.02409e-10	yes
ENSG00000180185	FAHD1	2.21269	2.48939	5.36501	7.07778	11.6778	26.7634	42.4236	74.0953	103.228	599.3	425.8	388.216	408.39	385.532	356	205.738	50.1984	16.9839	0.402229	0.00430632	29.9451	499.525	0.0249573	9.98167	1.0052	0.0585431	0.945481	17.1702	3.5635e-12	1.02409e-10	yes
ENSG00000143157	POGK	0.276586	2.31158	3.20357	7.25126	7.1364	15.8189	38.6613	57.8638	55.9997	29.2239	39.1028	28.2194	33.2463	27.3242	19.1494	4.07321	1.8023	1.49594	0.289876	0.00492948	30	35.3556	0.889607	0	1.03016	0.0600002	0.945475	17.1693	3.5665e-12	1.02409e-10	yes
ENSG00000188211	NCR3LG1	0.0307318	0.462315	0.578958	0.97146	1.87421	3.67882	6.48536	10.0667	15.3394	12.3016	10.2491	10.4685	12.9344	11.0552	10.4146	5.57675	1.45152	0.280488	0.0455323	0.00296082	30	12.4761	0.232218	0	1.05007	0.061315	0.945213	17.1258	3.71556e-12	1.06397e-10	yes
ENSG00000272886	DCP1A	0.153659	0.995756	2.00705	3.05316	4.79365	8.64524	20.746	20.7186	20.6542	91.3322	88.3601	66.4522	49.4911	80.2106	38.4556	6.91626	0.749952	0.88102	0.162242	0.00771184	28.3953	92.7058	0.614752	0	1.00884	0.0589572	0.945126	17.1114	3.76623e-12	1.07554e-10	yes
ENSG00000066735	KIF26A	1.56732	2.20489	2.43162	3.40011	3.8205	12.8759	28.3421	41.5152	40.4442	48.5465	54.5357	48.3599	59.5406	49.0484	46.4514	34.9093	16.2691	5.16386	0.131207	0.00245985	25.9944	56.6423	1.88609	0	1.00963	0.0590249	0.945088	17.1052	3.78831e-12	1.07889e-10	yes
ENSG00000006007	GDE1	3.10392	4.51646	5.01764	8.22272	13.2276	27.4532	71.3031	148.386	239.943	688.412	652.251	592.864	728.557	560.846	595.133	523.968	328.491	217.634	0.50013	0.00147226	29.9948	670.708	0.032473	9.98105	1.01932	0.0596404	0.945003	17.0911	3.83869e-12	1.08955e-10	yes
ENSG00000114383	TUSC2	0.522441	0.177814	1.11932	3.57359	4.46926	12.7839	28.9154	34.1408	42.6911	33.8445	40.239	37.1802	38.543	28.6518	15.7675	5.93213	6.01171	4.11742	0.227221	0.00567603	30	39.2235	0	1.17224	1.00412	0.0587583	0.94499	17.089	3.84658e-12	1.08955e-10	yes
ENSG00000148840	PPRC1	1.16781	2.84502	6.09836	15.7862	28.6898	49.5262	54.4985	88.8442	91.3019	30.7841	40.9491	41.2766	34.736	28.8449	23.2257	13.3951	2.18938	2.09287	0.448991	0.00476991	6.66392	40.3454	1.16735	0.000109261	0.994677	0.0582202	0.944964	17.0847	3.86195e-12	1.09095e-10	yes
ENSG00000198732	SMOC1	9.98785	15.5053	20.5723	34.5215	43.8637	81.348	131.391	215.536	209.48	169.883	178.211	194.663	182.996	179.828	177.877	136.439	72.0075	26.2005	0.628067	0.00227995	1.36135	188.073	10	10	1.00633	0.0589555	0.94487	17.0693	3.91867e-12	1.10399e-10	yes
ENSG00000168564	CDKN2AIP	0	2.59608	4.47728	7.97985	7.53287	8.00144	14.7623	12.876	12.4876	30.244	21.6107	22.8998	14.7078	12.6483	9.63071	1.53087	0.931392	0.273296	0.160912	0.0127181	0	28.1811	0.556024	0.800543	1	0.0586247	0.944799	17.0577	3.96188e-12	1.11177e-10	yes
ENSG00000131470	PSMC3IP	3.31904	1.60032	4.86325	12.0739	17.5166	31.6839	60.3031	125.131	146.61	30.184	37.2566	28.9875	27.9023	30.776	30.1688	16.1562	9.9792	2.7006	0.388913	0.00196512	20.2854	32.5574	1.30101e-07	0	1.07986	0.0633208	0.944775	17.0538	3.9763e-12	1.11177e-10	yes
ENSG00000166275	BORCS7	0.184391	0.142251	0.27018	0.797985	0.828976	1.60949	3.1531	7.72558	10.932	45.006	38.7478	35.7294	31.1891	34.107	35.8576	27.0363	17.769	10.4931	0.0251959	0.00172417	30	39.7284	0	0	1.0049	0.0589268	0.944772	17.0533	3.97819e-12	1.11177e-10	yes
ENSG00000090861	AARS	0.891223	0.746817	0.810541	1.87353	2.09046	4.27663	5.62542	13.5393	22.3394	73.9899	63.8617	64.0626	68.4788	56.2657	51.8043	45.4341	29.3933	18.4978	0.0562442	0.00241658	29.7659	59.6322	0.0502043	9.7415	0.998377	0.0585562	0.944751	17.0499	3.99105e-12	1.11239e-10	yes
ENSG00000125845	BMP2	0.0307318	0	0.27018	0.520425	0.973146	3.67882	3.43975	2.88734	3.28393	7.32098	6.93531	5.71785	4.65826	3.52415	1.36622	0	0	0	0.0459039	0.013465	29.6382	7.99339	0.0965842	0	1.00431	0.0590061	0.94457	17.0204	4.10387e-12	1.14079e-10	yes
ENSG00000106261	ZKSCAN1	6.0849	6.08122	11.5792	17.9026	38.169	104.019	243.219	276.521	343.732	1672.06	1094.05	924.755	878.614	938.703	597.171	178.948	31.8972	14.8011	2.62228	0.00903139	29.9117	1427	0.0468944	9.99707	1.01391	0.0595953	0.944527	17.0133	4.13156e-12	1.14544e-10	yes
ENSG00000176410	DNAJC30	0.307318	0.604566	0.501764	0.867375	2.05442	4.46057	7.84693	10.4178	8.90118	15.7821	16.0483	17.3527	15.9611	15.6173	14.4685	5.27604	0.955584	0.50344	0.0431119	0.00410823	30	18.3599	0.6766	0	1.01706	0.0598078	0.944478	17.0054	4.16255e-12	1.14862e-10	yes
ENSG00000008513	ST3GAL1	0.983419	5.19216	8.56858	16.0985	27.212	61.3904	57.365	55.9129	73.9316	985.991	521.095	403.435	393.753	362.867	139.265	45.8168	12.0839	7.52643	1.30503	0.0203203	29.3088	876.71	0.0480433	10	0.95195	0.0559812	0.944474	17.0048	4.16501e-12	1.14862e-10	yes
ENSG00000164902	PHAX	0.614637	0.817942	2.27724	3.92054	6.05513	14.1635	38.1597	53.2207	47.4874	304.061	177.833	192.7	183.658	169.135	132.971	40.6775	5.37062	2.67542	0.35108	0.00720524	29.9916	254.256	0.0771682	1.5724	1.01586	0.0597922	0.944382	16.9898	4.22449e-12	1.16196e-10	yes
ENSG00000167173	C15orf39	0.307318	0.248939	1.3895	3.29603	8.00142	12.3241	16.7329	15.9194	12.7468	50.7668	40.6177	40.5085	33.7901	35.8208	5.91281	1.55821	0.36288	0.118668	0.172674	0.0110218	16.7588	52.5967	0.278129	0	1.0099	0.0595036	0.944271	16.972	4.29656e-12	1.17868e-10	yes
ENSG00000141867	BRD4	1.56732	2.24045	3.12637	5.20425	7.20849	19.8656	48.9448	76.5535	76.1353	49.9267	45.5174	38.375	47.6703	34.5173	37.403	32.4764	10.8864	4.14978	0.288973	0.00318901	30	45.5707	1.31988	2.96144	1.00007	0.0589392	0.944246	16.9679	4.31328e-12	1.18017e-10	yes
ENSG00000067606	PRKCZ	0.737564	1.35138	3.08778	3.43481	7.42474	9.97881	22.7525	37.0282	44.4195	114.375	80.691	72.3976	76.0219	69.2519	71.4016	46.3909	23.0429	10.1659	0.148692	0.00315763	29.0904	90.4483	1.24631	1.99397	0.999979	0.0589662	0.944187	16.9585	4.35198e-12	1.18765e-10	yes
ENSG00000160785	SLC25A44	1.16781	1.20913	3.78253	6.45327	10.8127	27.9591	75.1728	70.9349	60.0614	185.905	168.672	134.27	158.523	144.973	98.0541	24.822	3.9191	1.42402	0.463707	0.00639019	30	189.223	1.4186	0	1.00908	0.0595324	0.944135	16.95	4.38706e-12	1.1941e-10	yes
ENSG00000135956	TMEM127	0.522441	0.0355627	0.424569	0.867375	3.02757	5.15035	8.77852	14.9439	9.37648	51.9069	45.2807	36.4975	33.2226	29.8828	25.3086	12.5477	1.14912	0.41354	0.0798453	0.00669274	29.9893	48.0091	0.250667	0.487621	0.999998	0.0590537	0.944033	16.9337	4.45568e-12	1.20963e-10	yes
ENSG00000196458	ZNF605	0.184391	0.39119	1.89126	2.63682	3.85654	6.80582	14.9414	25.5178	27.4813	20.0427	17.0661	14.1097	9.93132	13.469	6.53992	3.88185	0.435456	0.82708	0.134217	0.00498088	30	16.8757	0.000625186	0	1.03945	0.0614344	0.943945	16.9197	4.51551e-12	1.22138e-10	yes
ENSG00000091947	TMEM101	0.307318	0.355627	1.3895	1.73475	2.23463	6.89779	10.3192	23.9571	34.222	66.9689	57.5181	66.7367	60.7229	70.145	50.7068	31.9843	8.7817	3.91964	0.105224	0.00317485	29.1522	70.2241	0	0	1.04019	0.0614839	0.943935	16.9181	4.52232e-12	1.22138e-10	yes
ENSG00000140416	TPM1	13.0303	16.9279	22.4636	33.5154	44.4764	79.4166	112.078	176.635	198.159	502.447	452.523	447.301	426.597	514.043	441.154	395.84	251.923	132.833	0.459292	0.00146054	0	497.591	10	0	0.981501	0.0580443	0.943882	16.9095	4.55943e-12	1.22823e-10	yes
ENSG00000171456	ASXL1	2.98099	3.12952	4.82465	13.8086	17.012	42.9503	75.2445	82.8744	74.9687	80.5307	107.58	100.503	76.5657	66.8864	54.5591	15.2267	12.4468	6.84678	0.568445	0.00705088	28.1219	96.5758	3.71482	6.97247	1.0002	0.0591778	0.943832	16.9016	4.59379e-12	1.22896e-10	yes
ENSG00000100320	RBFOX2	0.983419	3.48515	10.6142	15.1617	19.1385	37.662	95.4172	131.374	158.19	193.226	186.993	250.163	178.929	192.501	184.305	104.4	25.6072	5.43356	0.546351	0.00318435	28.4078	222.782	3.96255	0	1.03014	0.0609586	0.943816	16.899	4.60526e-12	1.22896e-10	yes
ENSG00000140564	FURIN	6.36149	5.33441	10.6528	22.5865	33.3032	48.2846	93.7331	132.739	128.333	111.975	93.0231	68.6995	84.5581	82.914	80.562	48.7965	23.5146	12.4925	0.535828	0.00386506	27.0223	94.4036	10	6.80515	0.972932	0.0575759	0.943811	16.8983	4.60855e-12	1.22896e-10	yes
ENSG00000132854	KANK4	3.31904	13.4427	19.9934	24.9804	29.1944	54.2626	146.333	184.946	195.653	650.967	554.399	566.152	454.192	550.105	513.16	369.05	178.924	67.6192	0.674437	0.00254917	29.972	601.082	0.074512	9.91664	0.951839	0.0563281	0.94381	16.8981	4.6092e-12	1.22896e-10	yes
ENSG00000142039	CCDC97	0.368782	0.711254	0.926333	1.17963	1.29753	3.58685	7.66777	13.3442	10.6296	24.5433	28.9247	24.0377	25.7741	23.0277	21.0532	14.762	1.25798	0.568168	0.0462237	0.00348436	30	28.316	0.521829	0	1.02826	0.0608812	0.943757	16.8896	4.64668e-12	1.2358e-10	yes
ENSG00000064999	ANKS1A	0.184391	0.213376	0.463167	1.04085	0.720849	1.33357	3.29643	4.17493	3.5864	3.24043	3.43215	3.15762	2.17543	2.29311	2.39648	0.847447	0.459648	0.032364	0.0207016	0.00527306	18.9387	3.31193	0.198888	0.0864615	1	0.0592383	0.943702	16.881	4.68515e-12	1.23769e-10	yes
ENSG00000168395	ING5	0.0614637	0.142251	0.231583	0.55512	0.865019	3.54087	5.80458	7.53049	8.72834	36.2448	25.3742	21.3068	20.9031	16.8483	20.4933	7.27164	1.8144	0.528612	0.0522364	0.00632347	30	29.353	0	0.709625	1.00521	0.0595472	0.943702	16.8809	4.68525e-12	1.23769e-10	yes
ENSG00000243943	ZNF512	0.460977	1.42251	6.29135	9.54113	19.2827	31.408	64.8178	106.675	125.178	58.4478	50.3698	35.9855	38.1883	46.345	28.2202	24.986	12.1565	4.99844	0.410743	0.00289307	21.6727	49.0437	0.941737	0	1.02282	0.0605932	0.943697	16.88	4.6893e-12	1.23769e-10	yes
ENSG00000108604	SMARCD2	2.82733	5.12103	2.54742	5.62059	8.79436	16.0949	50.5213	75.8511	83.3945	156.981	131.369	99.3938	133.127	103.6	111.313	74.0833	19.2084	7.4653	0.336258	0.00372309	29.9857	131.629	0.0123388	9.98402	1.02003	0.0604839	0.943599	16.8645	4.7592e-12	1.25067e-10	yes
ENSG00000198909	MAP3K3	0.0921955	0.569003	1.23511	1.45719	2.1265	6.43794	8.95768	10.3788	8.94439	52.567	56.3346	57.719	49.0891	48.5415	38.5676	12.9031	3.3143	0.453096	0.0493769	0.00486253	29.9516	60.5668	1.02087	0	1.01783	0.0603574	0.943592	16.8634	4.76436e-12	1.25067e-10	yes
ENSG00000152582	SPEF2	0.0307318	1.20913	0.926333	0.797985	1.51378	2.20729	5.55376	8.11576	8.38266	12.9017	10.9119	12.7727	10.5461	8.47244	11.2209	6.12349	1.77811	0.532208	0.0297841	0.00322864	29.3883	12.6608	0.578009	0	1.01874	0.0604191	0.943578	16.8612	4.77437e-12	1.25067e-10	yes
ENSG00000103168	TAF1C	1.3522	2.41826	3.70533	6.10632	11.6057	33.2934	68.2217	105.349	125.394	190.465	209.077	149.517	172.876	223.349	135.188	96.3356	29.49	13.7115	0.431098	0.00328689	29.4955	202.89	4.36901	2.20792	1.04269	0.061902	0.94347	16.8442	4.8524e-12	1.2674e-10	yes
ENSG00000015153	YAF2	1.19854	3.30733	3.24217	9.09009	13.0474	26.7175	47.3324	78.1922	99.1228	558.434	343.31	428.867	340.81	375.805	325.966	210.659	44.0778	13.6576	0.381647	0.00407642	29.3404	459.535	2.0933	8.96391	1.02171	0.0606644	0.943457	16.842	4.86247e-12	1.2674e-10	yes
ENSG00000120137	PANK3	0.553173	0.640129	0.771944	2.1164	2.1265	4.96641	12.7916	18.0264	14.7345	24.6033	25.6583	30.5521	25.4667	25.2725	20.0453	12.0556	4.02797	1.60382	0.0662265	0.00356751	30	29.0916	0.797058	0	1.00676	0.0598117	0.943394	16.8322	4.90832e-12	1.27347e-10	yes
ENSG00000131043	AAR2	0.799028	0.213376	0.617555	1.94292	4.25301	10.7606	29.8828	35.6625	39.3207	112.815	122.989	112.536	130.762	123.9	103.519	56.5876	5.70931	3.15729	0.173889	0.00398232	29.9571	124.312	0.00825509	9.99927	1.04347	0.0619955	0.94339	16.8315	4.91178e-12	1.27347e-10	yes
ENSG00000171792	RHNO1	3.34977	1.77814	2.50882	3.71237	8.14559	14.0255	46.4008	60.7121	53.191	164.962	213.953	171.678	186.78	134.256	119.578	78.4572	10.1002	4.00594	0.26834	0.00428852	30	197.444	1.37495	0	1.0154	0.0603353	0.943375	16.8292	4.92234e-12	1.27347e-10	yes
ENSG00000129933	MAU2	0.0921955	0.746817	1.27371	1.97762	2.6311	4.87444	10.2118	13.4612	15.4258	80.1107	48.9732	44.548	46.3935	44.8484	37.6718	20.1747	1.8023	0.654472	0.0817891	0.00570044	28.6788	63.9761	0.419508	0	1.00063	0.0594775	0.943341	16.8237	4.94823e-12	1.27701e-10	yes
ENSG00000178826	TMEM139	0	0	0.887736	0.867375	2.6311	5.05838	7.59611	6.82816	6.61107	14.942	14.1547	8.5341	11.823	5.23795	5.08412	2.02294	0.387072	0	0.0842636	0.0120918	30	14.6246	0.250915	0.593798	1	0.0594739	0.943279	16.8141	4.99402e-12	1.28565e-10	yes
ENSG00000005801	ZNF195	0.768296	2.06264	4.47728	7.80638	14.3449	24.7861	66.1793	73.1199	57.3391	69.3092	73.4717	66.6513	41.215	39.1277	14.7148	6.12349	3.70138	0.895404	0.647306	0.00993842	30	75.6751	0.000716077	0	1.00656	0.0598798	0.943252	16.8098	5.01489e-12	1.28785e-10	yes
ENSG00000215012	RTL10	0.276586	0.426753	1.04212	1.97762	3.89258	9.24304	13.2215	19.6651	21.7776	57.9677	52.1923	42.1585	56.8213	33.1656	14.7148	0.656088	1.05235	0.21576	0.176813	0.00928352	30	61.3144	0.00732714	0	1.01565	0.060474	0.943156	16.7948	5.08733e-12	1.30125e-10	yes
ENSG00000188522	FAM83G	0.122927	0.462315	1.58249	4.57974	7.82121	17.4284	22.2509	27.1956	32.4504	63.6085	32.0018	37.3225	36.604	27.638	19.5974	2.81571	0.653184	0.043152	0.289163	0.0103125	29.7403	53.2013	0.513015	0.00410527	1.00004	0.0595483	0.94315	16.7938	5.09196e-12	1.30125e-10	yes
ENSG00000170855	TRIAP1	1.41366	2.24045	4.67026	7.49412	12.2544	28.189	83.0198	107.339	101.759	145.279	163.607	118.368	163.512	135.704	123.587	70.7208	19.0149	7.16683	0.441003	0.00353811	24.641	163.026	0.449942	0	1.00614	0.0599234	0.943128	16.7904	5.10888e-12	1.30239e-10	yes
ENSG00000105373	NOP53	3.01172	3.30733	5.01764	7.73699	11.1371	18.716	59.7298	120.098	188.653	165.502	201.242	149.688	179.213	166.649	138.01	123.099	67.4231	43.7453	0.438164	0.00191058	30	169.843	0	9.99998	1.04977	0.0625336	0.943108	16.7872	5.1242e-12	1.30312e-10	yes
ENSG00000127423	AUNIP	0.891223	0.640129	0.578958	2.04701	3.74841	10.2547	20.1369	20.3284	21.6048	20.8828	24.4038	23.611	24.9229	21.9414	10.9521	2.18696	0.387072	0.578956	0.143728	0.00646998	30	26.8607	0.553433	0	1.01068	0.0602459	0.943035	16.7759	5.18017e-12	1.31134e-10	yes
ENSG00000108826	MRPL27	8.72784	7.96605	21.0741	38.9972	49.0177	126.735	329.499	517.809	801.97	639.685	693.815	447.13	611.344	533.039	506.172	377.743	164.143	58.2408	2.12506	0.00236803	30	630.859	0	0	1.04663	0.0624083	0.943002	16.7707	5.20585e-12	1.31134e-10	yes
ENSG00000169139	UBE2V2	16.4415	14.0473	18.9898	29.4561	27.3562	49.7101	163.424	267.196	293.998	428.817	459.861	450.828	412.055	379.739	404.938	362.543	129.548	40.5377	0.872283	0.00220172	29.9635	468.894	1.11484	0	0.996911	0.0594437	0.943002	16.7707	5.20619e-12	1.31134e-10	yes
ENSG00000160679	CHTOP	1.99757	7.21923	11.1546	20.7476	23.3915	61.3904	118.42	127.355	129.629	288.038	352.162	341.734	350.859	329.58	238.326	147.264	26.5991	7.31786	0.575893	0.00377154	4.70674	366.742	1.99799	0	1.02239	0.0609634	0.943001	16.7706	5.20673e-12	1.31134e-10	yes
ENSG00000172922	RNASEH2C	4.91709	3.37846	1.89126	9.64521	8.97457	16.1408	34.9349	71.5592	104.999	151.94	126.706	121.582	134.569	130.273	104.773	83.5692	70.5076	59.1866	0.226958	0.00155031	30	125.758	1.88719	10	0.996529	0.0595085	0.942843	16.746	5.33093e-12	1.33458e-10	yes
ENSG00000261609	GAN	0.522441	0.995756	0.926333	2.01231	2.91944	4.82846	12.4333	11.8225	10.8456	112.395	77.3536	62.9248	53.6055	61.7209	43.4502	11.6182	1.25798	0.6293	0.109601	0.00981727	30	95.8878	0.495006	2.27564	1	0.0597198	0.942836	16.7449	5.33671e-12	1.33458e-10	yes
ENSG00000197746	PSAP	8.66638	9.70862	11.116	16.4454	22.923	52.8371	136.73	249.677	349.09	532.691	550.541	422.011	551.472	502.915	434.255	365.277	266.354	228.199	0.756597	0.00134781	29.7582	517.484	0.889824	9.36198	0.98976	0.0591087	0.942835	16.7447	5.33731e-12	1.33458e-10	yes
ENSG00000164611	PTTG1	5.34734	6.93473	9.37912	7.18187	11.6778	24.97	79.4009	175.815	250.918	540.792	609.597	580.575	551.188	621.722	486.956	503.985	375.472	267.363	0.488279	0.0010149	29.8885	584.456	0.0380465	9.97744	1.01077	0.0603944	0.94278	16.7362	5.38115e-12	1.34233e-10	yes
ENSG00000131504	DIAPH1	10.541	11.2734	7.68085	22.864	35.2856	53.067	117.883	240.273	265.177	291.519	303.189	331.464	250.411	291.225	305.047	223.699	130.008	65.1092	0.677314	0.00176655	28.0302	317.722	6.82599	0	1.01064	0.0604573	0.942653	16.7165	5.48404e-12	1.36474e-10	yes
ENSG00000158109	TPRG1L	1.84391	0.497878	2.00705	5.13486	8.14559	17.4744	42.0653	75.3829	92.7278	205.467	190.259	154.183	190.208	206.428	169.411	66.0462	7.95917	3.53846	0.350414	0.00383684	30	212.822	0	0	1.04447	0.0625151	0.942595	16.7075	5.53161e-12	1.37331e-10	yes
ENSG00000180530	NRIP1	0.0921955	0.213376	1.3895	2.49804	3.46008	6.62188	8.59937	7.49147	7.6481	18.1824	8.87625	3.84034	3.75971	3.04139	2.28449	0.492066	0	0.086304	0.295227	0.0419338	29.4139	16.8359	0.152734	0.660525	1	0.0598662	0.942572	16.7039	5.55088e-12	1.37483e-10	yes
ENSG00000088247	KHSRP	9.34248	7.93048	10.1897	12.6984	18.5619	52.9751	84.023	144.445	182.215	862.675	612.887	705.372	702.097	720.543	709.268	541.765	233.114	60.3948	0.500867	0.00230162	11.5932	784.507	2.07703	8.18084	1.0291	0.061653	0.942493	16.6918	5.61599e-12	1.38684e-10	yes
ENSG00000150764	DIXDC1	0.215123	0.497878	1.77547	2.01231	1.80212	4.27663	8.74269	16.7778	14.7777	154.041	110.018	97.7723	103.924	110.938	96.9342	53.8266	9.9792	3.56004	0.0658544	0.0040128	29.7186	132.265	0.525211	0	1.01566	0.0608604	0.942471	16.6884	5.63476e-12	1.38684e-10	yes
ENSG00000198894	CIPC	0.122927	0.39119	0.501764	0.381645	0.973146	3.127	8.06191	11.5884	9.72216	14.4019	10.6752	14.0244	11.3737	13.0587	7.25663	1.83158	0.229824	0.57536	0.0623879	0.00569721	30	14.6332	0	0	1.02444	0.0613896	0.942465	16.6875	5.63916e-12	1.38684e-10	yes
ENSG00000126456	IRF3	0.6761	0.533441	1.77547	0.936765	3.46008	15.2671	16.9479	42.5297	45.0244	219.329	157.24	185.133	154.101	163.342	141.415	119.845	68.9956	22.6368	0.129083	0.00240929	29.831	187.444	2.3652	2.76498	1.0364	0.0621693	0.942355	16.6706	5.73217e-12	1.40489e-10	yes
ENSG00000103429	BFAR	0.491709	0.604566	0.96493	1.17963	3.35195	6.29999	23.8633	37.9646	41.4812	81.7309	66.5127	95.9802	80.2782	65.5588	62.9356	25.8881	6.6407	2.35538	0.173317	0.00402956	30	87.7179	0	0	1.04077	0.0624367	0.942346	16.6693	5.73944e-12	1.40489e-10	yes
ENSG00000116685	KIAA2013	1.56732	1.88482	5.13343	6.52266	11.7498	30.9941	66.251	78.5044	88.1044	117.136	104.692	107.985	81.4132	114.969	102.22	41.5522	9.9913	4.07067	0.363923	0.00375913	23.2406	119.948	1.72642	0	1.0158	0.0610211	0.942199	16.6467	5.86579e-12	1.42847e-10	yes
ENSG00000101199	ARFGAP1	2.82733	3.55627	7.41066	11.6575	21.4813	70.6334	162.564	238.322	309.899	346.246	327.545	214.291	256.819	329.797	241.686	129.659	21.7607	5.87227	1.14679	0.00367169	30	329.848	0	0	1.04143	0.0625646	0.942192	16.6456	5.87191e-12	1.42847e-10	yes
ENSG00000156990	RPUSD3	2.24342	1.5292	1.58249	4.05932	4.54135	12.2781	38.948	75.9292	118.524	79.8106	71.5781	68.6142	73.7519	60.3691	75.0076	55.002	35.9614	16.2719	0.249961	0.00145101	30	75.4616	0	0	1.0721	0.0644105	0.942186	16.6447	5.8768e-12	1.42847e-10	yes
ENSG00000123415	SMUG1	3.4727	3.02283	2.16144	3.95523	11.6417	15.681	40.5245	65.8625	79.981	115.275	145.405	120.132	145.47	147.314	95.5232	70.8028	29.8408	15.7972	0.251048	0.00280835	30	143.254	1.66105	0	1.01478	0.0610048	0.942119	16.6345	5.93533e-12	1.43935e-10	yes
ENSG00000066654	THUMPD1	1.75171	3.09396	4.40008	7.87577	11.7138	19.6357	45.29	61.5705	53.5799	87.7317	87.6027	112.707	90.5642	87.8865	63.2939	17.7691	4.00378	1.69731	0.295491	0.00500917	29.0383	106.017	2.84748	0	1.01873	0.0612635	0.942081	16.6287	5.9683e-12	1.444e-10	yes
ENSG00000170846	AC093323.1	0.645368	0.640129	1.50529	4.1634	8.86644	13.7036	33.1792	63.9506	61.5737	55.6274	60.5005	56.9793	48.3797	65.9692	51.0204	24.986	6.6407	4.08865	0.237955	0.00328315	30	63.4457	0.267532	0	1.02464	0.0616381	0.942047	16.6235	5.99844e-12	1.44732e-10	yes
ENSG00000196428	TSC22D2	0.952687	1.88482	2.23864	5.23895	9.37104	17.5204	29.0229	27.5077	21.2159	24.3632	26.321	26.0575	16.5049	12.6	5.12891	1.20283	0.24192	0.66526	0.301382	0.0122084	30	28.8116	1.63794	0.171309	0.999999	0.0601627	0.942034	16.6216	6.00973e-12	1.44732e-10	yes
ENSG00000104907	TRMT1	0	0.0355627	0.463167	1.94292	1.4417	4.59853	11.1075	21.655	36.8578	31.2642	27.6229	24.4644	26.8619	25.4656	28.5562	20.4481	11.5275	5.80394	0.0788711	0.00164508	30	29.1098	0	0	1.0674	0.0643021	0.94189	16.5997	6.13827e-12	1.47488e-10	yes
ENSG00000259075	POC1B-GALNT4	0.0614637	0.106688	0.115792	0.312255	0.396467	1.65547	3.00978	3.00439	3.37035	25.3234	14.6044	18.0638	12.9344	9.80003	2.93401	2.10495	0.229824	0.104284	0.0441453	0.0150192	30	23.3602	0	0.369815	1.02236	0.0616182	0.941839	16.5919	6.18495e-12	1.48269e-10	yes
ENSG00000081059	TCF7	0.245855	3.84077	3.35796	4.37157	8.03747	12.8299	22.1434	29.3416	29.2961	166.942	131.44	122.038	111.68	142.849	110.91	88.0251	35.0663	11.2914	0.0948133	0.00278012	24.8825	148.305	3.48673	0	1.0142	0.0611619	0.941775	16.5823	6.24269e-12	1.4931e-10	yes
ENSG00000186193	SAPCD2	0.122927	0.106688	0.385972	1.14494	2.45089	5.0124	17.3421	57.7468	72.3329	81.6109	69.8265	61.9007	66.0906	69.6381	67.4374	49.2339	21.676	8.28518	0.183503	0.00210255	30	75.4766	0	0	1.08361	0.0653714	0.941736	16.5763	6.27906e-12	1.49837e-10	yes
ENSG00000112282	MED23	0	0	0.656153	1.80414	2.59506	3.127	5.0163	6.59406	7.95057	14.0419	11.3379	8.81857	12.0122	6.87933	6.09198	2.84305	0.580608	0.891808	0.0486701	0.00728823	29.1431	12.5411	0.454979	0.515656	0.999914	0.0604115	0.941573	16.5517	6.43041e-12	1.53084e-10	yes
ENSG00000122482	ZNF644	1.10635	0.78238	4.24569	9.09009	9.94772	17.7963	47.2249	50.1382	47.1849	30.9641	42.7007	30.6659	28.3043	24.0897	13.7518	1.42152	1.23379	1.04644	0.373398	0.00763174	28.9594	38.2436	1.29412	0	1.01393	0.0612668	0.941558	16.5495	6.44442e-12	1.53084e-10	yes
ENSG00000197562	RAB40C	0	0.426753	0.308778	0.83268	0.28834	4.59853	11.8958	15.9194	12.6172	42.9657	38.5348	39.9396	41.617	26.069	30.3703	9.18523	2.03213	0.517824	0.0792375	0.00514628	30	44.474	0	0	1.02349	0.061856	0.941537	16.5464	6.46399e-12	1.53201e-10	yes
ENSG00000132424	PNISR	0.799028	2.63164	3.93692	6.80022	10.8127	21.3832	59.9806	95.7113	95.1908	76.0901	49.1153	71.3451	49.4911	43.8105	39.3963	24.0566	6.41088	2.39853	0.434298	0.0041898	30	65.7217	0	0	1.02007	0.0617006	0.941446	16.5326	6.55059e-12	1.54902e-10	yes
ENSG00000064961	HMG20B	9.15809	10.5266	12.2739	16.5842	23.3555	43.686	48.8731	95.3992	159.962	218.549	241.481	192.842	232.629	223.639	198.796	157.297	108.404	80.0542	0.330986	0.00156953	1.55618	221.332	0.118037	9.99674	0.99086	0.0599462	0.941422	16.5292	6.57283e-12	1.55077e-10	yes
ENSG00000060339	CCAR1	8.69711	15.0075	13.1616	32.1276	49.6665	89.4414	243.076	425.453	454.306	752.62	581.927	766.988	613.283	610.064	681.697	447.698	175.767	56.0832	1.45797	0.00251207	30	738.997	0.000716032	0	1.00932	0.0610806	0.941391	16.5244	6.60295e-12	1.55437e-10	yes
ENSG00000130165	ELOF1	0.737564	1.06688	1.00353	1.80414	4.10884	7.90947	18.9903	44.8318	62.1354	60.7881	64.0037	45.6005	57.247	56.6036	43.9653	42.5637	13.2935	6.1096	0.162869	0.00230509	30	60.7118	0	0	1.06186	0.0643582	0.941222	16.4992	6.76725e-12	1.58947e-10	yes
ENSG00000115207	GTF3C2	0.614637	0.177814	1.15792	1.14494	1.29753	3.127	8.6352	15.7633	14.9073	55.8674	62.4178	48.3315	50.9571	36.7863	43.8533	34.9914	8.93894	3.27596	0.0550186	0.00304356	30	57.1101	0.247467	0	1.01628	0.0618521	0.940761	16.4309	7.23321e-12	1.6951e-10	yes
ENSG00000072864	NDE1	0.368782	0.604566	1.69828	3.26133	4.39718	10.2087	27.9121	38.4328	37.938	74.4699	88.5021	80.3628	100.354	66.0898	50.9756	17.9877	3.41107	0.956536	0.203616	0.00503971	30	92.9032	0	0	1.02136	0.0622398	0.94062	16.4101	7.38137e-12	1.72595e-10	yes
ENSG00000136802	LRRC8A	2.30489	0.640129	2.779	5.20425	11.2452	20.6934	56.3259	93.4093	96.5735	103.154	82.0876	93.5337	61.0067	87.1865	81.973	38.8732	6.6407	2.89118	0.388727	0.00359414	30	97.1725	3.85333e-05	0	1.02836	0.0627184	0.940527	16.3964	7.48076e-12	1.74529e-10	yes
ENSG00000118482	PHF3	0.706832	1.38695	2.43162	6.14102	4.93782	14.1175	49.5897	64.4969	69.8699	121.816	78.1347	109.663	69.3774	80.283	64.9961	29.4419	6.88262	3.98077	0.354029	0.00500777	30	107.183	0	0	1.01596	0.0620282	0.940407	16.3789	7.60997e-12	1.77148e-10	yes
ENSG00000165244	ZNF367	0.460977	0.39119	1.23511	2.74091	4.7576	9.74888	15.3714	17.207	13.6542	6.96093	5.04171	3.8119	2.10449	1.83449	1.05266	0.218696	0.36288	0.676048	0.191841	0.0127589	30	5.8623	0.430438	0	1.00667	0.0614903	0.940354	16.3712	7.66805e-12	1.78103e-10	yes
ENSG00000136463	TACO1	0.430246	0.248939	0.617555	1.28372	1.98233	4.3686	13.4007	24.0351	24.8455	37.505	32.2859	26.9393	37.337	27.0828	31.7142	17.8784	5.35853	1.66495	0.089074	0.00304019	30	36.1583	0	0	1.03108	0.0629949	0.94033	16.3677	7.69395e-12	1.78309e-10	yes
ENSG00000138594	TMOD3	0.460977	1.63588	1.62108	1.94292	3.27986	5.9321	17.7004	29.1465	29.685	27.4237	30.842	32.6856	29.1082	21.7725	27.4363	19.3819	8.32205	2.35178	0.095632	0.00253944	29.5647	31.4315	0.774957	0	1.01529	0.0621261	0.940156	16.3423	7.88787e-12	1.82244e-10	yes
ENSG00000183161	FANCF	0.276586	0.106688	0.27018	0.97146	1.08127	1.8854	4.47884	4.29199	3.71603	5.58074	3.90555	4.92133	4.30357	2.4138	1.59019	0.464729	0.18144	0.025172	0.0386656	0.0095934	28.1313	5.49181	0.164121	0.000540616	0.999342	0.0611557	0.940146	16.341	7.89863e-12	1.82244e-10	yes
ENSG00000136243	NUPL2	0.122927	0.106688	0.578958	2.35926	3.20778	5.05838	16.7329	22.8256	17.7159	50.2867	41.0438	48.5306	48.096	34.6863	33.7075	10.0053	2.34662	2.3374	0.110338	0.00509549	29.9993	51.7579	0.152906	0	1.00764	0.0616833	0.94011	16.3357	7.93944e-12	1.82398e-10	yes
ENSG00000104142	VPS18	0.0921955	0.177814	0.617555	1.59597	1.94629	5.84013	14.5473	15.5682	18.3209	19.0825	16.3086	11.7202	15.6064	17.7414	11.9152	3.49914	0.278208	0.262508	0.0956856	0.00515512	30	18.6171	0.0814081	0	1.01665	0.0622352	0.94011	16.3356	7.9402e-12	1.82398e-10	yes
ENSG00000176102	CSTF3	2.64294	3.20064	4.43868	8.63906	11.7859	19.2678	40.847	65.5894	75.1415	75.5501	58.1572	80.3343	55.9701	57.1346	58.6129	46.3089	20.4664	12.2552	0.213118	0.00231739	25.4394	71.3916	3.53784	0	1.0035	0.0614402	0.940091	16.3329	7.96138e-12	1.82483e-10	yes
ENSG00000141622	RNF165	0.491709	1.77814	4.59307	7.56351	12.3626	13.2438	15.5147	16.6997	17.6727	36.2448	16.6873	19.9129	18.0655	5.64829	3.04599	1.20283	0.54432	0.316448	0.347441	0.0227389	17.7954	32.7351	1.13505	0.74454	1.00001	0.0613253	0.939909	16.3066	8.16971e-12	1.86848e-10	yes
ENSG00000101146	RAE1	4.51758	5.97454	13.5476	21.9619	35.0333	62.2181	184.385	200.865	248.023	331.784	367.737	333.854	393.257	324.318	299.224	243.409	77.3781	26.294	0.85342	0.00282351	29.4662	374.372	0.081179	9.98514	0.983706	0.0603436	0.939876	16.3017	8.20877e-12	1.87332e-10	yes
ENSG00000151135	TMEM263	1.41366	1.77814	3.20357	6.45327	11.8219	24.3262	71.4823	165.671	157.369	173.603	177.265	210.593	181.53	163.921	166.79	80.0701	13.0032	4.9445	0.600834	0.00334303	30	201.567	0	0	1.06028	0.0650543	0.939852	16.2984	8.23593e-12	1.87542e-10	yes
ENSG00000196924	FLNA	49.4475	51.8504	52.3764	76.2943	140.385	274.854	413.666	657.806	964.741	381.771	412.047	296.93	396.969	325.429	302.046	253.824	170.408	120.405	2.09274	0.00153837	1.71076	364.058	10	10	1.02819	0.063194	0.939658	16.2704	8.46575e-12	1.92357e-10	yes
ENSG00000160439	RDH13	1.13708	1.5292	3.16497	6.48797	10.5965	26.8094	44.8959	46.3535	37.5491	109.155	128.149	92.851	81.1058	72.5347	72.6335	18.3158	2.66112	1.00328	0.298998	0.00653341	19.4307	119.096	1.33319	0	1.00249	0.061693	0.939513	16.2497	8.64045e-12	1.959e-10	yes
ENSG00000198933	TBKBP1	0	0.0711254	0.115792	0.104085	0.180212	1.14963	2.07818	2.65323	3.45677	4.02054	5.65713	3.86879	4.27993	3.91036	3.35955	0.710762	0.18144	0.129456	0.0161293	0.00495341	30	5.00218	0	0	1.03152	0.0634899	0.939495	16.2471	8.66307e-12	1.95988e-10	yes
ENSG00000108443	RPS6KB1	0.860491	1.35138	2.12285	2.32457	3.17174	7.08174	19.2053	27.7419	26.4443	86.7716	79.2472	96.4069	60.5811	71.4726	73.7309	42.6184	7.63258	2.20435	0.106904	0.00346702	30	89.5978	1.01251	0	1.02346	0.0630315	0.939426	16.2372	8.74765e-12	1.97474e-10	yes
ENSG00000179627	ZBTB42	0.153659	0.0355627	0	0.34695	0.576679	2.71313	6.19871	5.69664	6.17897	24.0032	20.7823	12.9434	19.0587	17.7414	11.4001	6.17816	0.326592	0.280488	0.0388102	0.00575575	29.9578	22.3256	0	0	1.0061	0.0619765	0.9394	16.2336	8.77916e-12	1.97758e-10	yes
ENSG00000167842	MIS12	1.04488	1.03132	2.66321	7.97985	7.53287	18.9919	35.6516	34.7261	25.0184	84.6713	68.643	83.3782	52.2104	50.6657	23.6512	5.44006	1.512	0.21576	0.309567	0.00982941	25.4277	88.1965	1.0381	0	1.00342	0.0618364	0.939354	16.2271	8.83573e-12	1.98604e-10	yes
ENSG00000175416	CLTB	0.307318	0.853505	0.656153	0.41634	0.865019	2.02335	5.19545	12.0956	14.7777	49.8066	45.044	43.9791	48.6635	35.1208	35.9024	26.8996	23.43	12.4709	0.0460385	0.00291483	29.984	37.5846	0	9.99571	1.01063	0.062328	0.939267	16.2146	8.94472e-12	2.00623e-10	yes
ENSG00000117481	NSUN4	0.491709	0.426753	1.04212	2.94908	5.91096	14.2095	23.4691	40.6959	49.3454	213.688	146.73	121.099	130.289	138.359	107.573	53.4165	14.2007	6.1168	0.255871	0.00590082	29.9969	168.909	0.000297075	9.99981	1.0235	0.0631621	0.939195	16.2044	9.0358e-12	2.02232e-10	yes
ENSG00000131368	MRPS25	2.48928	5.0499	3.16497	6.86961	9.11874	21.2912	51.847	92.0827	127.296	165.922	135.724	108.042	142.869	116.852	114.785	90.1301	60.6252	29.9115	0.336735	0.00218599	30	133.065	0.0520932	9.99862	1.01178	0.0624522	0.93917	16.2008	9.06815e-12	2.02522e-10	yes
ENSG00000198492	YTHDF2	2.76586	3.84077	5.90537	10.4085	16.2191	39.8693	133.828	155.799	137.925	491.646	544.576	557.874	413.427	527.246	320.367	88.2438	19.6318	14.6393	0.878052	0.00554582	30	572.489	0.00757403	9.97453	1.02201	0.063201	0.938958	16.1708	9.34102e-12	2.08171e-10	yes
ENSG00000106771	TMEM245	1.26001	2.59608	3.78253	4.51035	3.64029	10.7606	17.9154	23.2158	22.3394	196.226	116.291	124.911	111.467	119.845	99.689	55.5488	12.2291	5.31129	0.114754	0.00551762	29.5816	150.902	2.98185	7.95358	1.03188	0.0638441	0.938899	16.1625	9.41848e-12	2.09328e-10	yes
ENSG00000128309	MPST	7.56003	8.9618	9.95808	9.99216	16.4354	32.0058	58.6907	128.76	188.999	217.109	171.702	205.928	191.674	197.859	201.663	124.711	66.8546	16.2108	0.470961	0.00219856	29.8058	214.101	2.33433	0	1.04232	0.0645019	0.938877	16.1595	9.4463e-12	2.09328e-10	yes
ENSG00000104356	POP1	1.04488	1.31582	2.04565	3.95523	6.09117	16.0489	40.3095	56.4592	47.3577	85.6314	55.3641	57.6052	57.5544	59.4519	47.1905	34.4446	5.39482	2.63946	0.242266	0.0042107	30	72.2142	1.00955	0.31934	1	0.0618858	0.938872	16.1588	9.45299e-12	2.09328e-10	yes
ENSG00000136770	DNAJC1	0.706832	0.960193	1.73687	1.73475	2.34276	5.33429	15.1206	22.9036	23.5492	57.7877	47.7187	38.7448	38.1174	44.1967	40.2922	31.6562	16.8255	7.73859	0.0715191	0.00227739	29.304	49.3439	0.807608	0.0724879	1.00268	0.0620671	0.938844	16.1547	9.49108e-12	2.09727e-10	yes
ENSG00000168259	DNAJC7	13.184	14.5807	14.3968	28.6928	34.7449	66.8626	94.3064	172.265	197.9	245.973	200.769	241.799	214.091	185.283	204.44	177.144	131.459	59.8554	0.449546	0.00155267	0.811885	221.945	9.968	9.85163	1.01092	0.062638	0.938732	16.1391	9.6397e-12	2.12561e-10	yes
ENSG00000137074	APTX	13.2454	27.9879	31.0708	44.4096	71.7245	130.828	418.395	863.509	1108.59	855.234	1108.35	830.88	1042.01	888.954	828.935	694.907	332.217	135.947	2.83675	0.00200975	26.6905	997.787	0.708307	8.94052	1.05147	0.0651642	0.938708	16.1357	9.67249e-12	2.12836e-10	yes
ENSG00000119729	RHOQ	0.491709	0.675692	1.73687	1.97762	2.59506	3.54087	13.7948	30.0829	35.6479	60.4881	48.3105	55.6139	54.3858	51.1243	52.185	48.7692	25.4984	14.3337	0.0849553	0.00152896	30	57.9221	9.02503e-08	0	1.01786	0.0631487	0.938585	16.1185	9.83911e-12	2.16047e-10	yes
ENSG00000122729	ACO1	2.30489	2.6672	2.89479	5.5859	5.98305	12.1401	17.4137	27.3907	37.1603	61.5082	59.6957	60.3645	54.575	50.7622	52.1626	45.0787	27.47	33.8815	0.0769029	0.00148896	29.9962	49.5751	3.49043	10	0.982974	0.0610231	0.938512	16.1082	9.93951e-12	2.17794e-10	yes
ENSG00000100811	YY1	2.98099	5.19216	4.05271	7.6329	11.1011	31.8218	112.831	196.846	187.054	775.963	508.029	540.891	468.475	520.753	489.33	255.464	57.2141	16.7322	0.842045	0.00410712	30	643.739	0	5.79411	1.03151	0.0640561	0.938476	16.1032	9.98933e-12	2.18294e-10	yes
ENSG00000135070	ISCA1	0.6761	0.462315	0.849139	1.94292	2.1265	5.65619	13.5082	21.1478	22.1665	24.2432	27.6702	27.4229	29.0136	30.5587	20.2917	19.8193	5.79398	1.43121	0.0728698	0.00265743	29.987	29.8221	0.625625	0	1.02437	0.0636188	0.938465	16.1017	1.00041e-11	2.18294e-10	yes
ENSG00000106992	AK1	1.84391	2.56052	3.04918	3.36542	2.84735	6.62188	10.2118	25.5568	25.2344	146.9	126.469	102.438	122.321	108.669	104.639	89.8841	55.2787	34.0146	0.0632499	0.00179435	30	129.171	1.95848	0	1.00019	0.062135	0.938431	16.097	1.0051e-11	2.18861e-10	yes
ENSG00000110497	AMBRA1	0.614637	0.995756	2.93339	9.7146	9.22687	22.8087	38.4105	38.862	39.9257	65.0487	42.89	41.7602	46.2516	33.7932	37.7389	19.1359	3.09658	1.62539	0.257744	0.0060154	12.5708	52.9215	0.614645	2.97465	1	0.0621504	0.938381	16.09	1.01213e-11	2.19782e-10	yes
ENSG00000111737	RAB35	1.29074	1.17357	2.39303	3.08786	6.55973	13.8876	38.6613	51.9721	44.7219	102.074	70.8206	93.7613	70.4887	75.9381	71.9392	40.6775	6.85843	1.73327	0.213169	0.00389334	29.9997	94.5697	1.28474	0	1.01485	0.0630789	0.938371	16.0886	1.01354e-11	2.19782e-10	yes
ENSG00000124422	USP22	4.70197	7.89492	14.088	21.0252	33.952	70.3575	188.685	228.958	212.937	174.563	200.201	206.184	173.609	174.421	169.254	119.791	47.6461	15.4988	0.875973	0.00323369	4.44221	198.335	0.00385159	9.99545	1.00147	0.0622706	0.938327	16.0825	1.01973e-11	2.20666e-10	yes
ENSG00000167110	GOLGA2	8.54345	7.46817	6.02116	11.831	22.2021	41.4328	131.678	168.636	159.832	261.575	225.883	276.732	250.766	179.249	218.035	120.775	22.4744	5.43356	0.748817	0.003932	29.832	264.495	0.500633	8.71589	1.00473	0.0624841	0.938307	16.0797	1.02256e-11	2.2072e-10	yes
ENSG00000146063	TRIM41	0.460977	0.78238	2.66321	5.30834	5.73075	16.1868	38.1597	46.9778	41.3516	99.3732	105.947	89.5227	88.2469	99.5934	89.0953	55.5214	19.2326	8.80301	0.189213	0.00354098	29.9624	97.9337	0.986675	9.99741	1.00337	0.062406	0.938295	16.0781	1.0242e-11	2.2072e-10	yes
ENSG00000106635	BCL7B	0.491709	1.13801	1.92986	7.97985	9.29895	19.4058	36.5473	55.0155	51.333	58.9279	57.3287	68.0168	55.5681	64.4002	55.7013	41.0328	8.70912	1.90588	0.191823	0.0029395	9.3994	67.6117	0.767598	0	1.02372	0.0637075	0.93823	16.0691	1.03341e-11	2.22026e-10	yes
ENSG00000082701	GSK3B	0.460977	0.995756	2.31583	4.57974	5.29824	12.554	22.3584	26.3372	27.8702	31.7442	24.3564	23.1559	19.3424	26.407	15.5883	15.6914	5.20128	1.10397	0.139918	0.00494514	29.7182	25.5991	1.72941	2.9551	0.999268	0.0621898	0.938223	16.068	1.03451e-11	2.22026e-10	yes
ENSG00000161542	PRPSAP1	1.22927	1.84926	2.20004	1.90823	2.59506	4.50656	10.7134	15.9584	18.4505	49.8066	47.3163	39.3422	54.7641	43.5208	45.0852	35.3194	12.7734	3.93402	0.0508588	0.00234362	30	51.5373	1.45447	0	1.02754	0.0639628	0.938198	16.0646	1.03807e-11	2.22335e-10	yes
ENSG00000174607	UGT8	1.16781	1.13801	1.92986	1.73475	1.29753	5.97809	12.9707	22.9426	21.9937	63.2484	63.4119	44.9463	41.0258	53.9243	45.7795	31.0002	14.5636	8.65557	0.0790398	0.00299584	30	56.9206	0.732896	2.03637	0.999998	0.0622572	0.938182	16.0624	1.04037e-11	2.22372e-10	yes
ENSG00000214114	MYCBP	1.65952	1.20913	0.308778	1.90823	1.91025	5.74816	15.4072	33.7116	41.5244	69.1892	70.5603	62.9817	82.359	64.014	64.0778	57.025	32.0907	15.5167	0.100794	0.00167111	30	74.345	0	0	1.0223	0.0636761	0.938127	16.0548	1.04828e-11	2.23605e-10	yes
ENSG00000166913	YWHAB	81.255	110.28	108.921	138.884	171.67	268.278	495.754	761.243	1101.2	3170.52	3369.31	3176.14	3538.65	3203.19	3014.84	2673.89	1765.13	1092.73	2.52621	0.00173236	0.621961	3815.87	9.72177	9.88265	0.852264	0.0531058	0.938081	16.0484	1.05494e-11	2.24566e-10	yes
ENSG00000119772	DNMT3A	1.53659	3.87634	6.05976	4.99608	7.85725	10.8985	27.6613	44.3636	63.5181	74.65	55.6955	75.1854	66.2324	71.9795	66.0935	49.2066	23.7082	13.0139	0.151031	0.00196872	29.6234	73.8352	2.59309	0	1.026	0.0640016	0.937953	16.0308	1.0736e-11	2.28075e-10	yes
ENSG00000198408	MGEA5	1.96684	2.3827	4.40008	11.1024	17.6608	31.8218	61.0914	81.1966	75.2711	219.089	152.672	169.231	149.419	155.207	159.041	102.732	19.2931	6.35773	0.305139	0.00355878	27.3141	187.441	6.97663	5.70657	1.03723	0.0647354	0.937893	16.0226	1.08248e-11	2.29495e-10	yes
ENSG00000170242	USP47	1.62879	4.51646	7.41066	10.8248	17.1922	20.8773	48.4431	53.7669	50.8577	115.995	87.8867	117.941	100.472	87.1623	90.6407	44.4773	9.9913	3.48452	0.226865	0.00383231	0	115.923	2.39781	0	1.0147	0.0634047	0.937755	16.0036	1.10325e-11	2.32702e-10	yes
ENSG00000213533	STIMATE	0.184391	0.640129	0.463167	0.659205	1.15336	2.89707	7.30947	13.2271	14.8209	16.3822	21.6817	14.5649	15.5118	17.8863	15.4315	7.16229	3.59251	1.99218	0.0513308	0.00306638	30	18.9041	0	0	1.01514	0.0634331	0.937753	16.0033	1.1035e-11	2.32702e-10	yes
ENSG00000124275	MTRR	7.37564	7.8238	6.9089	13.08	16.94	29.7525	47.9415	60.2439	60.8823	130.457	99.13	133.928	116.055	121.39	100.451	82.4757	18.1561	6.45122	0.198279	0.00289307	8.83734	132.296	7.37568	0	1.02326	0.0639431	0.937748	16.0026	1.10429e-11	2.32702e-10	yes
ENSG00000037749	MFAP3	0	0	0.0771944	0.242865	0.108127	0.413868	2.6873	2.77028	2.80862	6.54087	7.5744	7.31088	5.15483	5.40691	4.12105	2.54234	0.36288	0.050344	0.0150625	0.00485727	29.562	7.37091	0	0	1.02786	0.0642702	0.937676	15.9927	1.11526e-11	2.34541e-10	yes
ENSG00000188735	TMEM120B	1.13708	1.35138	2.04565	2.8103	5.0099	9.42699	21.6776	32.385	31.4566	105.494	70.2052	57.0362	73.9883	76.4692	56.3509	37.233	7.92288	3.2328	0.139994	0.00407521	30	87.1267	1.0952	0	1.00717	0.0631001	0.937447	15.9615	1.15065e-11	2.41499e-10	yes
ENSG00000165912	PACSIN3	2.76586	2.45383	3.82112	5.82876	10.8127	25.108	53.9969	114.479	183.252	367.429	331.664	265.809	349.914	305.901	305.741	203.032	100.506	36.183	0.477138	0.00251642	29.9849	343.944	0.00981222	9.99848	1.04451	0.0654877	0.937361	15.9498	1.1643e-11	2.43872e-10	yes
ENSG00000272325	NUDT3	1.78245	3.59183	4.70886	4.892	6.81202	12.7839	29.8828	59.6977	89.0118	181.524	143.937	150.143	119.838	135.511	139.556	112.191	52.2789	27.5849	0.218201	0.00205905	27.8342	159.487	0.0750921	0	1.01608	0.063726	0.937322	15.9445	1.17048e-11	2.44676e-10	yes
ENSG00000175376	EIF1AD	0.245855	1.03132	3.39655	5.16956	8.8304	21.751	31.0652	33.8287	27.3517	117.856	84.4546	103.519	43.7451	74.5623	24.256	8.9392	7.5721	1.79081	0.372872	0.0121606	29.433	111.949	0.779889	3.60539	0.996434	0.0625392	0.937237	15.933	1.18409e-11	2.47028e-10	yes
ENSG00000242802	AP5Z1	1.13708	1.49363	1.89126	2.91438	4.64948	11.4963	23.29	23.684	28.6912	7.26097	6.3909	7.36777	7.16474	4.44139	4.32262	3.44446	2.16518	0.798312	0.165923	0.00616699	29.4451	6.0324	1.02798	1.49322	1.00096	0.0628588	0.937171	15.924	1.19479e-11	2.48489e-10	yes
ENSG00000154380	ENAH	2.08976	4.44534	6.25275	8.3268	11.1732	28.051	63.922	104.412	89.5735	81.0108	95.9345	87.8159	86.0241	93.7279	62.958	60.3328	20.5753	7.74578	0.393564	0.00352652	29.2356	87.2421	1.2975	9.82476	1.00078	0.0628508	0.937164	15.9231	1.19585e-11	2.48489e-10	yes
ENSG00000148339	SLC25A25	0.0307318	4.80097	18.1407	30.1847	49.8107	86.3604	93.6615	123.141	160.74	116.956	138.209	113.589	88.3887	64.0381	23.3153	3.77251	6.72538	5.8435	1.31462	0.0100193	17.9968	135.453	1.25972	0	1.00509	0.0631425	0.937125	15.9178	1.20223e-11	2.49321e-10	yes
ENSG00000164494	PDSS2	0.153659	0.248939	0.578958	1.35311	1.73004	2.39124	5.80458	10.5739	9.895	60.4881	45.0203	45.5721	38.8267	46.2243	45.2643	29.3326	15.7248	6.9223	0.0317944	0.00246947	29.8887	52.043	0.486666	0	1.00672	0.0632858	0.937048	15.9075	1.21478e-11	2.51424e-10	yes
ENSG00000144559	TAMM41	3.74928	2.52495	3.39655	4.33688	5.22616	12.8759	35.7949	51.3868	50.1664	156.081	173.312	135.038	169.258	163.945	114.605	113.011	62.1613	24.5391	0.150298	0.00216163	26.8166	168.338	2.84802	0	1.00912	0.063497	0.936936	15.8924	1.2333e-11	2.54753e-10	yes
ENSG00000100664	EIF5	4.97856	7.57486	13.4704	23.2804	27.6085	45.8014	157.942	300.634	322.646	211.888	211.231	241.06	194.583	249.635	194.675	170.556	93.0303	45.2233	0.886596	0.00187659	30	236.304	0.227756	0	0.997044	0.0627512	0.93691	15.8888	1.23775e-11	2.55167e-10	yes
ENSG00000155366	RHOC	4.88636	2.59608	2.779	5.10017	9.15478	12.0941	40.3095	109.68	161.345	340.305	383.833	312.32	335.631	297.453	320.053	278.455	201.265	174.719	0.307507	0.00103984	29.9731	336.689	0.0172685	9.97106	1.01416	0.0638385	0.936891	15.8864	1.24083e-11	2.55298e-10	yes
ENSG00000145016	RUBCN	0.0614637	0.248939	0.308778	0.867375	1.36961	3.54087	7.41696	7.02325	6.69749	23.1031	17.0424	15.8165	17.7818	16.1725	14.1997	6.58822	1.62086	0.370388	0.0363536	0.00466862	29.9014	20.8978	0.458599	0	1.00384	0.0632546	0.936768	15.8698	1.2617e-11	2.59082e-10	yes
ENSG00000174136	RGMB	0.215123	0.426753	0.810541	2.25518	4.86573	8.36932	12.8632	11.1982	10.1975	11.5215	12.4504	10.7245	4.51639	2.94484	0.89588	0	0.048384	0.226548	0.191951	0.0174908	30	13.3988	0.316388	0	1.01105	0.0637176	0.936751	15.8676	1.2645e-11	2.59148e-10	yes
ENSG00000120253	NUP43	0.891223	1.38695	2.31583	2.53274	5.22616	6.98977	15.2639	23.3718	24.0678	26.4035	30.3923	23.1843	26.8855	20.8552	24.9727	19.9833	8.57606	3.61758	0.0712947	0.00223283	0.000104981	28.2036	0.509893	0	1.00969	0.0637053	0.936616	15.8495	1.28783e-11	2.63412e-10	yes
ENSG00000182473	EXOC7	0.0614637	1.38695	0.192986	1.28372	0.828976	3.67882	13.4365	29.8488	44.5923	62.5883	57.9678	52.2856	50.3423	49.0484	38.8812	41.4702	28.2684	22.7303	0.102947	0.00184887	30	45.9282	0	10	1.03756	0.0654836	0.936579	15.8446	1.29414e-11	2.64186e-10	yes
ENSG00000029363	BCLAF1	24.3396	34.7803	33.9269	80.3536	82.9337	112.526	283.636	488.897	516.355	696.573	530.705	729.922	516.263	526.764	517.729	361.969	219.18	63.9513	1.73474	0.00267319	29.9581	647.602	0.132152	9.9919	0.95575	0.0603524	0.936516	15.8362	1.3052e-11	2.65627e-10	yes
ENSG00000170606	HSPA4	1.22927	1.84926	3.97551	4.82261	7.85725	12.508	35.1499	70.8958	84.9069	122.896	96.7156	134.668	106.029	99.883	100.787	78.4299	54.2627	23.1439	0.231112	0.00209361	30	110.078	0.0597449	9.60991	1.01461	0.0640722	0.93651	15.8354	1.30628e-11	2.65627e-10	yes
ENSG00000089916	GPATCH2L	0.6761	1.74257	2.97199	1.87353	4.14488	7.26568	19.5994	25.5959	24.111	79.2706	55.9796	67.9314	35.6582	54.1898	34.357	16.6756	1.59667	0.895404	0.159351	0.00657905	30	71.3926	0.608588	0	1.00043	0.0632029	0.936461	15.8288	1.31493e-11	2.66866e-10	yes
ENSG00000161513	FDXR	0.307318	1.8137	1.58249	2.8103	2.19859	8.09341	11.5017	24.1132	40.617	264.935	216.178	204.392	212.719	213.308	175.167	133.131	75.1887	84.2075	0.0988505	0.00221645	29.987	224.827	0.00576811	9.99995	0.975046	0.061622	0.936417	15.823	1.32263e-11	2.6791e-10	yes
ENSG00000182963	GJC1	0.276586	0.426753	0.926333	3.01847	6.52368	13.1518	25.8698	21.0698	27.0924	86.1115	45.1387	46.5393	51.4537	42.2898	26.4733	3.36245	0.024192	0.183396	0.254849	0.0101904	30	72.5981	0.155891	0	1.00094	0.0632709	0.936393	15.8198	1.32691e-11	2.68256e-10	yes
ENSG00000151729	SLC25A4	1.29074	0.426753	2.35443	3.98993	2.70318	3.40291	9.81761	22.6695	28.3023	18.7225	18.4626	18.6043	14.0457	19.1656	12.2512	11.7822	7.08826	2.86961	0.0694787	0.00193821	30	18.3611	0.764737	0	1.04678	0.0661895	0.936356	15.8149	1.33352e-11	2.69073e-10	yes
ENSG00000142634	EFHD2	1.41366	1.88482	1.65968	2.56743	4.97386	5.65619	7.20197	15.8023	21.6912	16.0221	15.2908	17.4096	18.8459	15.1587	15.5659	11.9463	9.19296	6.42246	0.0410785	0.00125818	30	17.132	1.87723	0	1.02102	0.0646013	0.936281	15.8049	1.34705e-11	2.71278e-10	yes
ENSG00000139977	NAA30	0.368782	1.5292	1.00353	3.26133	3.06361	8.92115	28.2346	37.2232	27.9134	102.974	84.2415	93.3346	68.2896	89.1899	60.8526	12.9304	2.52806	0.668856	0.198847	0.00580833	30	103.23	0	0	1.017	0.0643712	0.936236	15.799	1.35508e-11	2.7237e-10	yes
ENSG00000169908	TM4SF1	13.8601	29.1259	51.8361	75.3576	104.415	171.111	262.388	292.753	298.622	385.491	436.262	409.039	477.626	415.101	348.184	199.068	33.8325	8.30316	1.33338	0.00382	0	476.479	10	0	0.967097	0.0612849	0.936095	15.7804	1.38092e-11	2.77032e-10	yes
ENSG00000153879	CEBPG	0.184391	1.13801	1.08072	3.95523	5.55054	11.7722	30.5278	35.5845	36.2097	27.3636	18.5573	23.9524	20.9031	26.4552	12.8111	3.49914	0.96768	0.704816	0.217463	0.00575099	30	26.9257	0.336343	0	1.01152	0.0641125	0.936071	15.7772	1.38531e-11	2.7738e-10	yes
ENSG00000133639	BTG1	2.98099	5.01434	7.56505	14.7107	20.3279	47.8707	88.3944	74.2124	60.191	213.148	138.754	171.479	149.041	104.735	54.6263	6.09615	2.7337	1.38446	0.755115	0.0105234	27.9438	205.804	3.99764	0	1.0033	0.0636254	0.936007	15.7688	1.39718e-11	2.7914e-10	yes
ENSG00000101166	PRELID3B	1.16781	1.06688	1.96846	3.05316	5.37032	10.1628	26.8014	57.3566	60.2774	93.7325	100.882	97.7154	80.2545	94.0658	96.1951	75.3408	25.4742	10.8707	0.177271	0.0021851	29.987	103.022	3.5164e-06	0	1.02617	0.0650828	0.935995	15.7672	1.39944e-11	2.7914e-10	yes
ENSG00000166716	ZNF592	0.153659	0.0711254	0.308778	0.589815	1.58587	5.10437	5.84041	5.85271	5.66046	27.3636	22.0131	15.7027	15.228	19.6483	10.1682	6.06881	1.40314	0.780332	0.0522949	0.00833286	23.2143	23.5388	0.112376	1.4379	0.999998	0.06347	0.935906	15.7554	1.41623e-11	2.81952e-10	yes
ENSG00000054523	KIF1B	1.47513	3.94746	3.62814	4.54505	9.04665	14.5314	27.4822	31.1754	34.1356	66.7889	60.3585	72.8243	69.6138	74.4416	62.1517	24.8493	8.01965	2.9631	0.131881	0.00350682	1.78691	76.2768	1.47514	0	1.02259	0.0649326	0.935853	15.7485	1.42617e-11	2.8339e-10	yes
ENSG00000100888	CHD8	0.491709	1.77814	0.849139	4.23279	7.96538	18.0262	38.3389	35.9747	40.7899	93.7925	70.4183	54.3053	61.9525	78.0382	48.2207	19.2726	5.38272	3.18606	0.238641	0.00567678	27.5706	82.853	1.13151	1.40895	0.999982	0.0635171	0.935815	15.7435	1.43345e-11	2.83966e-10	yes
ENSG00000125733	TRIP10	0.768296	0.533441	1.15792	1.90823	3.06361	8.27735	10.1759	21.1478	27.6541	347.506	226.285	265.012	287.677	247.97	196.354	107.216	16.2207	4.59209	0.117269	0.00480398	29.9782	305.139	0.0336425	9.97303	1.02106	0.0648661	0.935795	15.741	1.43714e-11	2.83966e-10	yes
ENSG00000035928	RFC1	1.29074	1.03132	2.97199	5.23895	6.88411	9.84085	24.5799	34.9212	36.6417	35.7648	29.4691	31.4055	34.8306	39.4898	28.6682	23.4825	8.05594	2.33021	0.118224	0.00263165	13.3314	37.173	1.29071	0	1.01662	0.0645845	0.935795	15.7409	1.43722e-11	2.83966e-10	yes
ENSG00000150867	PIP4K2A	0.614637	0.640129	1.62108	2.7756	3.67633	6.20802	15.658	24.8155	30.8949	51.1868	35.2446	29.8978	27.122	33.8656	26.3389	15.2267	2.34662	0.679644	0.130178	0.00447928	30	41.0683	0.11897	0	1.01856	0.0647242	0.935764	15.7369	1.44315e-11	2.84601e-10	yes
ENSG00000115561	CHMP3	4.8249	5.90341	4.47728	8.63906	9.87563	22.6708	43.4627	71.208	122.542	214.949	217.196	181.037	230.548	199.621	186.41	178.702	97.8204	72.9521	0.260349	0.00152287	29.9269	209.671	0.0164955	9.99258	0.991886	0.0630428	0.935739	15.7336	1.44801e-11	2.85021e-10	yes
ENSG00000065325	GLP2R	0.399514	0.462315	0.656153	0.797985	1.29753	2.16131	4.83715	7.72558	9.07402	19.1426	16.8057	19.4009	16.1739	19.3828	18.9031	15.4181	8.23738	4.3116	0.0214621	0.00162522	30	19.663	0.566274	0	1.01886	0.0647686	0.935717	15.7308	1.45212e-11	2.85228e-10	yes
ENSG00000120675	DNAJC15	0.33805	0.177814	0.385972	0.13878	0.504594	1.79343	3.58307	7.10129	10.1543	14.942	12.7108	14.5364	11.9176	10.7897	11.3777	11.5089	6.0359	2.52799	0.0237717	0.00173071	30	13.941	0	0	1.0235	0.0650704	0.935705	15.7291	1.45452e-11	2.85228e-10	yes
ENSG00000249773	AC092647.5	0.921955	0.853505	1.81407	3.85115	5.08199	8.23137	26.2639	65.3163	65.6354	34.5046	44.1682	43.3817	43.6269	38.5001	29.0937	20.1747	12.7855	4.61007	0.211085	0.0025851	30	41.4901	0	1.67715	1.04425	0.0664636	0.93557	15.7115	1.48074e-11	2.89825e-10	yes
ENSG00000130764	LRRC47	2.42781	2.88058	4.55447	10.2697	17.3004	42.2605	124.548	184.516	241.931	199.347	218.569	184.962	246.226	205.173	191.853	156.614	46.4849	16.3115	0.720303	0.00254182	30	219.385	0	9.99988	1.04366	0.0664411	0.935544	15.7081	1.48591e-11	2.90295e-10	yes
ENSG00000112992	NNT	2.21269	1.84926	3.51235	5.5512	5.69471	7.63356	14.4756	16.5827	19.9628	45.4861	47.1743	48.1608	46.2752	48.0105	38.5228	24.4393	22.4381	20.7525	0.052477	0.00254119	28.4637	39.0685	3.43301	10	0.973447	0.0619973	0.935493	15.7014	1.49601e-11	2.91721e-10	yes
ENSG00000242485	MRPL20	2.85806	3.66296	4.55447	5.44712	7.56891	18.854	64.2445	117.405	173.227	270.336	337.96	266.605	321.704	306.335	287.846	208.144	153.752	104.956	0.375468	0.00144773	30	314.55	0	0	1.01471	0.0646495	0.935447	15.6955	1.50504e-11	2.92935e-10	yes
ENSG00000183763	TRAIP	0.245855	0.213376	0.578958	0.97146	1.33357	2.52919	3.40392	5.03333	5.35799	3.84051	5.23107	4.7791	3.16856	3.18622	3.42674	1.91359	0.338688	0.043152	0.0219719	0.00417361	29.2542	4.6703	0.5004	0	1.00948	0.0643707	0.935345	15.6823	1.52549e-11	2.96203e-10	yes
ENSG00000083454	P2RX5	4.91709	4.26753	3.66674	7.45943	14.9576	31.0401	71.8764	112.255	169.814	108.314	128.055	104.827	113.383	98.8451	115.255	86.795	62.8387	51.1028	0.348862	0.00128427	30	106.404	3.56068	9.99995	1.01601	0.0647928	0.935335	15.681	1.52749e-11	2.96203e-10	yes
ENSG00000133302	SLF1	0.6761	0.640129	0.849139	2.8103	3.5682	6.71385	18.9544	22.5524	19.9196	61.2082	48.6655	71.8287	44.1234	46.007	32.0277	14.8713	3.95539	1.26939	0.124635	0.00557478	29.0053	63.4	0.480046	0	1.00287	0.0640938	0.935071	15.6469	1.58141e-11	3.06091e-10	yes
ENSG00000107872	FBXL15	0.0614637	0.0711254	0.308778	0.20817	1.00919	2.29926	4.51467	9.36434	10.8024	11.6416	11.3143	11.0943	10.4042	12.069	12.2736	8.03708	1.8144	0.697624	0.0326194	0.00249219	29.7718	12.5854	0	0	1.04588	0.0668681	0.935025	15.6409	1.59117e-11	3.07083e-10	yes
ENSG00000175283	DOLK	1.04488	0.889068	0.617555	2.22048	3.64029	5.42626	17.4854	28.8344	24.1974	37.445	48.8312	36.5259	44.4781	41.976	25.555	13.9419	2.92723	1.10397	0.123636	0.00439199	30	46.4776	0.21066	0	1.01814	0.0650977	0.935019	15.6401	1.59241e-11	3.07083e-10	yes
ENSG00000126653	NSRP1	1.3522	4.23196	7.52646	10.7555	13.624	23.6824	67.3976	114.128	152.314	196.286	170.542	149.261	134.971	92.0141	89.4984	32.0936	10.4388	6.5663	0.733621	0.00587432	30	177.666	0	0	1.03349	0.0661316	0.934922	15.6278	1.61261e-11	3.10405e-10	yes
ENSG00000125779	PANK2	0.921955	7.07698	4.40008	8.77784	15.318	25.062	63.0979	75.6561	65.0305	166.822	211.16	198.645	180.726	188.735	128.85	90.7315	38.2717	7.61992	0.277597	0.00344528	25.9893	206.519	5.4995	0	1.01084	0.0647494	0.934796	15.6116	1.63952e-11	3.15005e-10	yes
ENSG00000197982	C1orf122	2.0283	1.28026	2.89479	7.18187	11.3534	18.3481	52.3487	102.891	153.351	69.6693	60.5715	61.5309	52.2104	62.9278	58.3218	52.8151	37.3404	28.9118	0.299986	0.00105504	29.5465	53.2451	0.0422593	9.45046	1.08274	0.0693662	0.934777	15.6091	1.6437e-11	3.15228e-10	yes
ENSG00000162910	MRPL55	10.3259	4.4809	22.6952	18.9435	37.0877	118.78	361.174	631.742	1096.14	1936.88	1739.74	1451.65	1836.8	1859.3	1307.54	1121.17	396.011	180.785	2.8839	0.00267407	30	1884.9	0	8.94095	1.05146	0.0674219	0.934668	15.5952	1.66711e-11	3.19133e-10	yes
ENSG00000099804	CDC34	2.15123	2.24045	1.27371	2.63682	7.3887	19.2219	46.0783	92.1997	82.3143	212.008	166.542	143.686	172.663	167.88	167.821	115.253	33.4696	9.05113	0.302888	0.00281077	30	193.055	1.0211e-08	0	1.02333	0.0656323	0.934642	15.5918	1.67294e-11	3.19663e-10	yes
ENSG00000064419	TNPO3	34.1738	86.5596	77.04	109.844	136.529	199.3	368.626	566.425	732.273	1189.78	856.546	876.367	738.559	778.137	860.022	624.486	259.544	113.166	2.0699	0.00249082	0	987.825	10	0	0.995968	0.0638899	0.934618	15.5888	1.67806e-11	3.20055e-10	yes
ENSG00000161091	MFSD12	10.7869	15.9677	26.4391	58.2529	101.496	210.383	425.633	582.462	891.371	248.193	240.227	202.002	263.133	221.249	235.594	185.236	133.189	87.2749	2.02737	0.00154836	29.8157	246.931	5.03967	5.16111	0.938508	0.0602243	0.934577	15.5835	1.68715e-11	3.21203e-10	yes
ENSG00000178988	MRFAP1L1	0.245855	0.640129	2.12285	4.68383	6.1993	11.3584	36.2965	44.5977	34.6109	38.7652	45.186	43.2963	38.2119	39.9243	30.6839	8.39246	2.02003	0.694028	0.222932	0.00522884	29.8028	47.5718	0.748412	0	1.0075	0.0646645	0.934552	15.5804	1.69256e-11	3.21648e-10	yes
ENSG00000114861	FOXP1	4.27172	24.396	35.0077	58.1835	72.3372	119.194	177.075	122.478	145.53	841.012	658.783	635.819	507.94	515.395	358.038	100.518	11.1041	5.40838	1.18761	0.00795305	0	797.753	10	1.19161e-07	0.993358	0.0638328	0.934406	15.5619	1.72501e-11	3.2668e-10	yes
ENSG00000134108	ARL8B	1.59806	1.99151	3.70533	3.95523	8.72227	15.9109	51.6679	92.6679	98.734	236.312	189.478	251.955	195.883	168	202.894	146.909	55.9803	28.1531	0.319605	0.00259402	30	222.295	2.06176e-05	8.41267	1.01978	0.0655375	0.934393	15.5602	1.728e-11	3.2668e-10	yes
ENSG00000133316	WDR74	0.153659	0.355627	0.578958	3.5042	6.30743	13.8416	32.391	61.4145	100.851	165.322	153.595	114.215	142.207	136.114	136.577	77.8011	24.192	11.2842	0.282312	0.00290566	30	158.009	0	0	1.05371	0.0677196	0.934391	15.5599	1.72841e-11	3.2668e-10	yes
ENSG00000102287	GABRE	0.891223	1.8137	4.67026	9.7493	15.0657	37.8919	61.9871	66.4478	75.7897	4.92066	2.74572	2.64557	2.86117	2.36552	2.01573	0.984132	0.387072	0.435116	0.55095	0.00765268	27.4121	3.52116	1.35245	0.345653	1	0.0642835	0.934361	15.5561	1.73523e-11	3.27375e-10	yes
ENSG00000145191	EIF2B5	0.645368	1.20913	2.04565	3.22664	4.68552	9.381	21.4626	27.7028	34.6109	40.8054	37.6116	41.6749	33.2463	39.3208	42.4647	26.0248	17.6239	6.05926	0.0909134	0.00196452	8.53949	42.2454	0.673147	0	1.01292	0.0651247	0.93434	15.5535	1.73987e-11	3.2766e-10	yes
ENSG00000114416	FXR1	3.4727	2.02707	2.8176	5.65529	10.0558	16.9226	45.3258	84.3961	80.0242	104.774	80.2176	107.956	80.893	89.6003	85.0862	56.5329	40.6547	14.8802	0.270941	0.00264703	30	90.753	1.8245	9.98924	1.01019	0.0649661	0.934309	15.5495	1.74705e-11	3.2842e-10	yes
ENSG00000101247	NDUFAF5	0.276586	0.853505	1.46669	1.94292	1.87421	4.46057	6.48536	13.032	12.5308	27.0036	22.0131	21.2499	15.228	17.5725	14.7148	13.7505	5.04403	3.0602	0.0493781	0.00373738	29.9326	21.1792	0.762763	1.95048	1	0.0643264	0.934279	15.5458	1.75373e-11	3.29084e-10	yes
ENSG00000179886	TIGD5	0.276586	0.213376	1.04212	3.57359	7.82121	12.6919	15.1564	14.1245	15.5987	10.3214	6.79329	7.0833	7.87412	5.43105	4.38981	2.18696	1.01606	0.363196	0.233195	0.0153469	24.7052	8.50298	0.245	1.73565	1	0.0643433	0.934247	15.5416	1.76116e-11	3.29807e-10	yes
ENSG00000181610	MRPS23	0.891223	1.24469	1.15792	1.76945	2.23463	6.254	20.4235	43.8953	53.796	90.312	67.4122	70.3494	63.8206	74.2244	66.0264	60.7702	21.047	9.08709	0.146012	0.00218589	30	79.8975	0	0	1.04265	0.0670941	0.934235	15.5401	1.7639e-11	3.29807e-10	yes
ENSG00000181523	SGSH	1.59806	1.92039	2.47022	2.91438	2.59506	5.33429	5.23128	7.10129	6.7407	7.20096	5.77548	6.20145	5.48587	5.26208	4.34502	3.38979	2.83046	0.64728	0.0289538	0.00515915	0	5.2398	1.64832	1.51701	1	0.0644372	0.934067	15.519	1.80257e-11	3.36437e-10	yes
ENSG00000169379	ARL13B	0	0.355627	0.926333	1.3878	5.87492	7.95546	31.316	39.5643	39.0183	100.333	80.478	118.254	83.896	76.5416	62.1069	10.8255	2.16518	0.949344	0.233714	0.00580591	30	107.783	0	0	1.03753	0.0669175	0.933953	15.5046	1.82945e-11	3.40845e-10	yes
ENSG00000057757	PITHD1	1.84391	2.34714	3.62814	5.89815	4.7576	11.9562	40.7753	54.001	49.4318	286.478	253.411	290.615	233.575	291.297	241.977	160.14	59.1494	21.1517	0.197262	0.00296311	29.9718	288.006	0.0217149	9.99388	0.990547	0.0638984	0.933932	15.5019	1.83451e-11	3.41179e-10	yes
ENSG00000158850	B4GALT3	1.19854	1.17357	0.926333	2.28987	4.21697	12.9679	41.8144	49.9822	51.8515	355.727	253.222	227.434	272.544	294.797	236.647	153.361	25.2927	11.0361	0.21835	0.00370544	29.0736	306.137	1.22618	9.82451	1.04127	0.0672095	0.93386	15.4929	1.85149e-11	3.43726e-10	yes
ENSG00000124228	DDX27	3.50343	8.1083	10.8844	16.2373	21.9138	42.0765	113.261	151.936	197.036	143.179	121.285	140.898	108.772	88.7554	106.296	92.3444	47.0292	20.2491	0.570569	0.00249475	27.6536	122.307	5.81695	9.89169	1.01267	0.065377	0.933834	15.4897	1.85773e-11	3.44213e-10	yes
ENSG00000144560	VGLL4	0.430246	0.462315	1.15792	2.60213	3.20778	6.34597	13.8665	14.7488	11.8826	41.2855	38.6531	48.4168	34.3103	34.2277	11.0641	5.63142	0.84672	0.219356	0.106416	0.00784475	29.2957	47.3708	0.598628	0	1.00689	0.0650108	0.933822	15.4881	1.8607e-11	3.44213e-10	yes
ENSG00000143294	PRCC	1.22927	2.27601	2.31583	3.05316	8.21768	16.0029	51.8829	73.2369	56.8206	198.146	179.324	191.903	150.247	167.759	164.103	98.9599	15.2531	5.27893	0.263972	0.00345432	29.786	201.204	1.54583	0	1.02386	0.0661285	0.93378	15.4829	1.87075e-11	3.45461e-10	yes
ENSG00000092820	EZR	3.68782	6.08122	11.4634	11.7616	19.7873	36.6963	88.0361	147.254	153.221	571.936	514.183	410.917	411.511	538.615	448.298	374.708	124.323	38.7073	0.484604	0.00245898	12.2822	538.952	2.37025e-08	0	1.02055	0.0659296	0.933752	15.4794	1.87741e-11	3.46079e-10	yes
ENSG00000196793	ZNF239	0.122927	0.284502	0.617555	1.52658	2.59506	6.07006	5.15962	5.6186	4.14812	72.0096	51.3166	35.0467	26.6727	34.4691	11.5569	0.874784	0.145152	0	0.0904108	0.0173212	23.9139	67.603	0.203642	0.855181	0.999993	0.0646234	0.93371	15.4742	1.88763e-11	3.47351e-10	yes
ENSG00000125945	ZNF436	0.0307318	0	0.192986	0.312255	0.828976	2.62116	4.33552	3.16046	3.24072	5.40072	4.21326	4.15326	2.17543	1.0138	0	0	0.193536	0.079112	0.0643005	0.0188375	30	5.56903	0	0	1.03862	0.0671522	0.93365	15.4666	1.90235e-11	3.49139e-10	yes
ENSG00000172728	FUT10	0.184391	0.0711254	0.578958	1.04085	1.33357	2.25328	4.76548	4.87726	4.4938	9.48126	8.37918	9.13149	7.87412	3.59656	1.56779	2.05028	0.290304	0	0.0483901	0.0107874	30	9.96532	0.216378	0.203298	1	0.0646591	0.933643	15.4658	1.90403e-11	3.49139e-10	yes
ENSG00000153904	DDAH1	0.737564	0.426753	3.58954	2.60213	2.27067	16.4168	37.0848	49.1628	42.3886	41.0455	58.2282	44.3773	47.3156	46.1277	34.6706	18.1244	8.27366	3.91604	0.22908	0.00450682	30	50.2186	0.464015	3.08221	1	0.0646871	0.933589	15.459	1.91727e-11	3.5095e-10	yes
ENSG00000159147	DONSON	2.55074	3.76965	4.43868	9.09009	21.229	31.9138	67.2901	124.858	155.079	38.7052	41.1385	42.4998	46.8191	48.0829	32.2517	29.688	20.0673	3.7722	0.388223	0.00185301	29.9999	44.8449	3.74995	0	1.05014	0.0679697	0.933518	15.4501	1.93491e-11	3.53226e-10	yes
ENSG00000156398	SFXN2	0.645368	0.675692	0.424569	0.659205	1.40566	4.3686	5.91207	9.59845	8.85797	63.4285	42.9847	44.5764	39.7489	38.7415	37.9181	26.7903	16.1361	7.14166	0.0442083	0.00453516	26.6983	42.7823	0.255621	9.47352	0.995307	0.0644238	0.933511	15.4494	1.93646e-11	3.53226e-10	yes
ENSG00000116560	SFPQ	13.4913	15.1853	24.239	38.4074	50.099	73.6684	147.336	221.428	207.104	323.923	322.456	312.377	246.982	302.184	289.212	226.05	123.016	49.0351	0.666504	0.00226069	29.8166	320.922	10	9.99606	0.941584	0.0610167	0.933368	15.4316	1.9723e-11	3.59137e-10	yes
ENSG00000115355	CCDC88A	8.48199	20.2707	39.3306	37.1237	49.0538	96.7071	301.587	387.371	366.374	509.288	331.688	423.889	290.964	310.366	286.256	183.787	60.0324	25.4165	1.81328	0.00444663	30	422.986	10	10	0.9865	0.0639746	0.933276	15.4202	1.99566e-11	3.62759e-10	yes
ENSG00000168066	SF1	7.83662	7.71711	16.095	30.4622	34.4926	106.318	195.492	434.895	568.941	1355.28	1401.88	1262.25	1078.47	1491.99	1309.49	1029.27	460.712	299.173	1.41455	0.00188312	29.8932	1418.25	0.779361	5.9603	1.0204	0.0662219	0.933184	15.4087	2.01941e-11	3.65918e-10	yes
ENSG00000095787	WAC	11.0327	25.4985	40.2183	66.4756	75.9414	171.571	361.102	337.272	284.967	611.422	600.981	604.954	630.048	554.715	365.765	125.914	22.3534	5.98374	1.99386	0.00574156	9.43603	687.062	10	8.23165	1.01419	0.0658202	0.933181	15.4084	2.02004e-11	3.65918e-10	yes
ENSG00000144579	CTDSP1	1.3522	0.711254	2.47022	4.30218	6.88411	20.6934	42.3519	72.3395	105.604	48.3064	57.6128	46.5962	60.0135	51.6795	51.1771	36.0848	9.02362	2.75094	0.278907	0.00225151	30	56.8468	0	0	1.07276	0.0696554	0.933121	15.401	2.03565e-11	3.68108e-10	yes
ENSG00000140612	SEC11A	33.8972	34.318	47.4746	56.4488	69.8503	139.703	456.232	752.386	1120.68	979.451	1146.05	982.076	1082.61	990.213	1003.45	925.576	713.555	648.801	1.9912	0.00071424	21.4986	1052.91	7.80203	9.99063	1.00029	0.0649677	0.933086	15.3967	2.04473e-11	3.68669e-10	yes
ENSG00000101210	EEF1A2	0.891223	1.13801	1.19651	1.11024	1.65795	6.16203	9.74595	27.2736	35.6911	71.1095	73.661	58.1457	65.7122	72.0278	55.2758	54.4006	39.191	32.3964	0.0769518	0.00136534	29.9833	60.9471	0.198754	8.8202	1.00743	0.065434	0.933082	15.3962	2.04581e-11	3.68669e-10	yes
ENSG00000114388	NPRL2	1.56732	0.569003	2.16144	3.19194	2.8834	8.00144	22.8958	33.9847	52.3268	55.1474	60.1218	53.8502	55.1661	58.0278	58.8369	50.7921	37.5702	22.8274	0.107655	0.00129851	29.8425	49.9729	0.941753	9.73264	1.02855	0.066874	0.932954	15.3805	2.0793e-11	3.73622e-10	yes
ENSG00000196411	EPHB4	7.65223	5.22772	8.56858	11.8657	22.8149	73.2546	320.506	356.82	292.529	572.416	456.192	369.64	395.55	397.432	342.853	180.123	26.2725	8.0011	1.83071	0.00505574	30	507.274	0	9.16963	1.0147	0.0659754	0.93295	15.3799	2.08044e-11	3.73622e-10	yes
ENSG00000168569	TMEM223	1.93611	2.16933	2.97199	6.31449	10.0919	19.5438	44.1434	83.1475	98.8636	234.871	143.724	194.208	175.17	155.111	152.524	65.2808	8.91475	2.41651	0.42911	0.00468506	29.9138	198.423	0.04668	9.99981	1.04844	0.0681891	0.932914	15.3755	2.09014e-11	3.7472e-10	yes
ENSG00000108963	DPH1	1.19854	2.34714	2.89479	9.57582	19.571	44.9736	106.417	242.692	379.856	620.723	635.895	491.137	634.54	566.712	536.543	466.205	161.639	68.6225	0.928077	0.00219194	30	640.277	0	0	1.05819	0.068859	0.932849	15.3675	2.10749e-11	3.77098e-10	yes
ENSG00000198000	NOL8	26.2143	19.5239	23.3899	25.9172	32.5463	48.8824	105.808	157.789	193.752	293.799	212.486	290.387	179.568	203.821	199.423	137.751	38.7798	4.27205	0.646684	0.00334218	23.7634	265.664	10	0	0.9979	0.0649419	0.932837	15.366	2.11062e-11	3.77098e-10	yes
ENSG00000101236	RNF24	0.368782	1.56476	0.771944	2.60213	3.60424	11.7722	13.9381	14.9439	10.932	170.543	130.019	110.317	93.9219	93.3175	75.5003	24.2753	2.04422	0.79112	0.112584	0.00828174	24.4256	151.88	0.968091	2.1039	0.999992	0.0651123	0.932771	15.358	2.12837e-11	3.7962e-10	yes
ENSG00000105085	MED26	0.0921955	1.45807	2.27724	2.74091	4.64948	14.7613	14.4756	11.9395	10.8024	33.0044	28.049	21.2215	18.1838	8.68968	1.20944	0.136685	0.399168	0.7192	0.230032	0.0186337	29.2059	35.0182	0.846687	0	1.0032	0.0653342	0.932746	15.3549	2.13512e-11	3.80119e-10	yes
ENSG00000177150	FAM210A	0.737564	1.06688	1.62108	4.51035	5.04594	11.3124	34.5766	49.3579	52.1108	145.939	79.1051	109.692	82.9029	88.6106	71.3568	24.6306	5.24966	1.17589	0.293343	0.00581429	30	121.267	0	0	1.02024	0.0664506	0.932734	15.3534	2.13844e-11	3.80119e-10	yes
ENSG00000112320	SOBP	0.276586	0.746817	2.31583	2.1164	3.31591	4.78247	9.02934	9.13023	11.0184	14.942	12.5924	15.276	10.9245	5.64829	7.07745	2.59701	0.157248	0.115072	0.0707797	0.00769051	30	15.0632	1.08783	0	1.00095	0.0652122	0.932699	15.3491	2.14796e-11	3.80672e-10	yes
ENSG00000197879	MYO1C	1.90537	2.45383	3.28076	3.98993	8.28976	21.981	26.2281	53.962	83.1353	263.015	291.07	263.049	282.357	264.697	294.028	225.312	143.628	74.9227	0.182546	0.00153051	29.9952	283.902	0.00532747	9.99726	0.998129	0.0650301	0.932695	15.3487	2.14884e-11	3.80672e-10	yes
ENSG00000146083	RNF44	0.399514	0.213376	0.96493	1.14494	1.76608	6.43794	13.5082	18.5726	24.1542	10.3214	15.5512	15.7312	11.3974	11.7552	9.22756	4.61995	1.72973	0.442308	0.0886617	0.00355711	29.0495	14.107	0.0522191	0	1.03535	0.0675433	0.932531	15.3286	2.19407e-11	3.88028e-10	yes
ENSG00000100354	TNRC6B	1.84391	5.83228	9.45632	11.1024	13.2276	27.5912	53.3519	60.3219	54.2281	95.1727	77.0459	95.7526	39.3706	60.4416	37.8957	11.6456	2.81837	1.95263	0.4587	0.00849923	27.8997	92.9791	3.86863	0.949911	1.00002	0.0652458	0.932517	15.327	2.1979e-11	3.88048e-10	yes
ENSG00000170315	UBB	91.8882	74.8595	93.9842	131.668	176.428	261.886	714.464	1461.62	1746.32	2234.1	2629.74	1787.61	2269.54	2181.95	1502.05	1286.34	975.784	458.166	4.84943	0.00218269	29.8327	2306.96	0.14625	8.90049	0.983274	0.0642061	0.932413	15.3143	2.2269e-11	3.92506e-10	yes
ENSG00000262664	OVCA2	0.399514	0.78238	0.96493	3.19194	6.52368	14.9912	35.4724	80.8064	126.647	206.908	211.255	163.144	211.513	187.938	177.698	155.356	53.4522	22.7663	0.309544	0.00219598	30	212.912	0	0	1.05823	0.0691089	0.932398	15.3124	2.2313e-11	3.92618e-10	yes
ENSG00000185127	C6orf120	0	0.0711254	0.347375	0.55512	0.901061	1.70146	3.54724	6.35995	5.27157	3.48046	3.19545	3.66966	3.47596	2.34139	2.2173	2.05028	0.653184	0.77314	0.0264921	0.0043153	29.9598	3.03209	0.100012	0.564532	0.99997	0.0653372	0.932334	15.3048	2.24919e-11	3.94543e-10	yes
ENSG00000142751	GPN2	0.768296	0.640129	1.54389	1.90823	2.34276	6.02407	11.7883	19.0408	21.6048	16.9823	12.7818	20.3112	14.9206	14.5552	14.4237	6.31485	3.44736	1.09318	0.0746426	0.00317294	30	17.5575	0.708073	0	1.01875	0.0665682	0.932328	15.3039	2.25114e-11	3.94543e-10	yes
ENSG00000125691	RPL23	80.0872	78.2024	105.37	138.086	212.29	333.393	663.226	1553.39	2388.41	2053.17	2261.64	2143.85	2306.55	1737.36	1669.16	1319.34	1203.12	672.88	5.02315	0.00145553	30	2148	3.38695	0	1.01398	0.0662609	0.932319	15.3029	2.25356e-11	3.94543e-10	yes
ENSG00000114062	UBE3A	3.90294	11.5579	17.3301	28.9009	40.0792	67.3685	205.023	295.991	350.171	276.397	259.565	332.176	235.798	300.494	264.665	96.2536	12.7976	5.17824	1.31747	0.00358677	30	313.502	4.14724	0	1.04059	0.0680094	0.9323	15.3006	2.25889e-11	3.94814e-10	yes
ENSG00000164080	RAD54L2	0.276586	1.24469	1.46669	3.05316	4.61343	8.46129	12.2183	17.8313	20.9567	60.4281	41.9669	27.4229	33.7901	31.3553	24.9951	8.96654	0.919296	0.312852	0.143733	0.00825187	29.7802	49.4997	0.705069	0.851927	0.999995	0.0653773	0.93226	15.2957	2.27038e-11	3.96161e-10	yes
ENSG00000105438	KDELR1	27.4128	23.5425	29.9514	34.2787	56.9471	121.309	238.848	439.266	821.933	719.136	791.004	633.116	772.326	716.319	651.215	609.888	434.948	359.722	1.47014	0.000979313	29.9929	733.062	0.0238158	9.99785	1.01832	0.066605	0.932204	15.289	2.28647e-11	3.98302e-10	yes
ENSG00000121579	NAA50	10.2337	9.28187	12.8529	21.5109	31.6453	85.3487	303.629	607.629	616.212	498.786	392.188	536.909	387.936	414.908	443.998	288.569	92.4618	30.0769	2.01158	0.00260148	30	493.747	0	0	1.04792	0.0685775	0.932137	15.2809	2.30581e-11	4.01004e-10	yes
ENSG00000019485	PRDM11	0.460977	0.604566	1.08072	1.28372	1.73004	4.87444	9.101	9.32532	11.4938	14.5819	16.8767	19.6569	17.4744	17.0414	9.27236	4.86599	1.4999	1.4348	0.051834	0.00457662	23.1167	18.9025	0.532704	0	1.00131	0.0655555	0.932082	15.2742	2.32181e-11	4.02866e-10	yes
ENSG00000103037	SETD6	2.0283	2.16933	2.58601	3.74706	5.0099	8.46129	23.075	42.5687	34.0924	57.9077	65.6369	44.8609	37.1952	45.9346	29.6312	13.5865	6.32621	3.15729	0.210725	0.00573702	30	58.1102	0.487387	1.03542	1	0.0654746	0.932073	15.2731	2.32451e-11	4.02866e-10	yes
ENSG00000025434	NR1H3	0.276586	0.640129	1.04212	2.18579	3.09965	8.96713	16.1238	36.716	45.0244	285.758	215.444	188.973	201.062	250.673	185.044	155.958	58.9922	34.8237	0.136614	0.00273439	29.7681	238.788	0.0821677	9.88317	1.02277	0.0669722	0.932061	15.2716	2.32808e-11	4.02866e-10	yes
ENSG00000131188	PRR7	6.73027	6.50798	10.6528	16.2373	18.4898	36.9722	65.2477	104.295	130.191	35.6448	39.2685	27.1384	39.0868	26.938	27.0108	25.4234	7.00358	2.93434	0.350336	0.0023087	21.3136	36.0506	6.61913	0	1.05403	0.0690294	0.932041	15.2692	2.33391e-11	4.03207e-10	yes
ENSG00000114867	EIF4G1	81.3472	77.1711	91.4754	119.49	154.478	390.691	416.496	944.042	1013.91	912.782	699.425	780.955	608.861	702.102	720.422	501.06	342.172	167.663	2.72991	0.00199245	0	792.966	10	9.95244	0.983215	0.0644286	0.931968	15.2605	2.35515e-11	4.05612e-10	yes
ENSG00000173214	MFSD4B	0	0.106688	0.27018	0.20817	0.360424	1.42554	3.86972	2.84832	3.1543	11.8816	10.4385	7.6238	7.04651	5.60002	4.65858	2.92506	0.133056	0.240932	0.0319345	0.00980749	30	10.6541	0	0.6211	1.01002	0.0661859	0.931967	15.2604	2.35559e-11	4.05612e-10	yes
ENSG00000156521	TYSND1	0.245855	0.142251	0.771944	3.33072	4.32509	10.0248	33.1076	45.339	53.3207	63.8485	72.9983	48.8719	69.803	54.5519	51.6475	47.0196	16.2086	6.30738	0.167179	0.00251256	30	67.8065	0.303032	0	1.01445	0.0664962	0.931929	15.2558	2.36673e-11	4.06859e-10	yes
ENSG00000240849	TMEM189	1.38293	3.09396	7.48786	8.15333	13.2997	33.9371	94.1273	120.41	117.357	223.77	191.798	202.742	164.127	231.628	187.821	92.4537	16.1965	4.16417	0.541284	0.00389596	30	219.333	0.061945	10	1.01643	0.0666998	0.931788	15.2389	2.40895e-11	4.13438e-10	yes
ENSG00000100029	PES1	1.22927	1.60032	2.97199	5.20425	8.50602	20.2795	35.0783	74.8367	98.8636	84.0712	94.1356	66.3669	79.8762	82.7209	72.6559	71.869	33.893	20.1772	0.22999	0.00163202	30	86.6656	1.08379	0	1.02617	0.0673617	0.931746	15.2338	2.42177e-11	4.14957e-10	yes
ENSG00000188428	BLOC1S5	0.0307318	0	0.656153	0.242865	0.865019	1.47153	5.62542	8.70103	10.2839	62.8284	39.4579	46.5677	40.1036	36.8587	28.5114	9.02121	2.00794	0.607724	0.0584697	0.00671217	30	55.2294	0	0	1.02906	0.0675644	0.931721	15.2308	2.42934e-11	4.15572e-10	yes
ENSG00000100395	L3MBTL2	0	0.853505	0.771944	0.83268	1.83816	4.78247	10.1759	13.1101	16.9814	27.4837	25.3269	24.1515	24.379	25.7794	20.1125	23.5918	9.42278	2.10726	0.0450031	0.00206163	29.4891	27.4361	0.68075	0	1.02459	0.0673456	0.931579	15.2139	2.47266e-11	4.22062e-10	yes
ENSG00000010165	METTL13	1.10635	0.426753	2.31583	4.05932	5.947	18.624	36.5473	47.6411	37.2035	68.5891	93.1651	62.7256	63.4186	66.5485	54.2903	25.8335	3.37478	2.50282	0.21615	0.00466671	29.7241	81.7868	1.62001	0	1.00614	0.0661376	0.93157	15.2128	2.47536e-11	4.22062e-10	yes
ENSG00000118900	UBN1	2.36635	4.08971	7.98962	16.6536	29.1223	72.8407	213.551	262.319	261.548	365.149	232.534	217.932	223.857	238.001	206.388	138.899	27.6031	8.55488	1.31303	0.00446177	29.9971	287.346	0.00919939	9.99489	1.00388	0.0660144	0.931521	15.2069	2.4907e-11	4.23986e-10	yes
ENSG00000260027	HOXB7	0.153659	0.462315	0.810541	1.21433	3.31591	4.6905	17.4854	36.8721	39.8393	128.717	91.0585	104.344	97.9654	68.4554	66.5191	27.8837	5.7335	0.848656	0.199078	0.00562985	30	116.716	0	0	1.04055	0.0684537	0.931469	15.2007	2.50683e-11	4.26039e-10	yes
ENSG00000176444	CLK2	0.829759	1.49363	4.05271	9.26357	24.1124	25.6598	40.2021	50.4504	55.2219	18.7225	20.5219	16.2148	14.2585	16.1483	2.88921	4.34658	0.943488	2.08208	0.364452	0.00695212	12.5687	19.8728	0.829714	0.152699	1	0.0657992	0.931444	15.1977	2.5147e-11	4.26683e-10	yes
ENSG00000221963	APOL6	0.0307318	0.142251	0	0.13878	0.252297	1.2416	2.14984	2.41912	2.41974	32.5843	22.9126	14.7924	18.2547	18.4897	16.641	5.52207	0.532224	0.111476	0.0169002	0.00655556	29.3055	26.661	0	0.0245165	1.00104	0.0659339	0.931316	15.1826	2.55499e-11	4.32816e-10	yes
ENSG00000198917	SPOUT1	0.215123	0.39119	0.771944	1.21433	1.80212	6.75984	10.6417	24.3083	27.0492	87.8517	63.767	58.2595	65.6413	67.1036	67.8405	49.7533	14.9386	5.42636	0.084093	0.00258755	29.3688	76.4438	0	0	1.02787	0.0677156	0.931288	15.1792	2.564e-11	4.3364e-10	yes
ENSG00000079459	FDFT1	14.9664	13.6205	12.5441	20.3313	31.3569	66.3108	199.326	349.212	415.374	815.509	953.191	886.807	1027.68	973.679	858.275	787.907	441.008	235.347	1.02465	0.00156501	29.9403	975.997	0.00769188	9.98646	1.00365	0.0661354	0.931257	15.1756	2.57363e-11	4.34564e-10	yes
ENSG00000171943	SRGAP2C	0.184391	0.604566	0.849139	1.21433	2.01838	2.25328	6.19871	8.07674	9.03081	53.7672	36.0494	30.5521	31.3073	28.7242	14.7596	3.28044	0.338688	0.255316	0.0793625	0.0106204	27.1692	48.2941	0.0514842	0.150988	1.00002	0.0659405	0.931172	15.1656	2.6009e-11	4.36942e-10	yes
ENSG00000136813	ECPAS	7.37564	12.2691	21.846	32.6827	44.4403	65.2531	90.9742	102.422	97.6537	77.2303	80.9514	71.7718	53.6764	69.5174	54.5591	30.3441	28.22	21.1589	0.575004	0.00578446	0	72.9312	9.27287	10	0.87552	0.0577317	0.93117	15.1653	2.60154e-11	4.36942e-10	yes
ENSG00000072195	SPEG	5.13222	6.18791	7.21768	12.282	18.2735	34.259	55.0718	89.9367	118.999	40.6854	53.2102	45.06	51.9976	35.8208	41.972	33.8705	14.2733	6.42965	0.294903	0.00203715	21.3822	48.7646	5.66006	0	1.04036	0.068604	0.931165	15.1647	2.60315e-11	4.36942e-10	yes
ENSG00000167196	FBXO22	1.3522	4.16084	4.43868	10.0962	14.1647	20.1416	51.5962	66.2137	64.5984	38.3451	28.8774	31.5477	30.4088	20.7345	18.4551	17.8237	12.1686	4.57411	0.348733	0.00526783	29.7165	27.0974	3.10451	6.85462	1.00002	0.065946	0.931161	15.1643	2.60443e-11	4.36942e-10	yes
ENSG00000103160	HSDL1	0.0307318	0.213376	0.231583	0.312255	1.00919	2.25328	6.66451	11.6664	11.8826	51.8469	37.9193	49.0711	33.2463	41.807	41.5912	26.6536	3.58042	0.870232	0.044628	0.00322816	30	48.5195	0	0	1.04044	0.0686691	0.931054	15.1515	2.6394e-11	4.41595e-10	yes
ENSG00000174013	FBXO45	0.430246	1.38695	2.54742	7.73699	8.50602	22.1189	69.4041	80.7284	57.6848	111.555	98.2068	112.337	97.8944	93.1727	73.9325	16.2929	2.68531	2.12164	0.437664	0.005742	30	120.762	0.00227236	0	1.00436	0.0662963	0.931037	15.1496	2.64483e-11	4.41595e-10	yes
ENSG00000154237	LRRK1	0.307318	0.675692	0.347375	1.52658	1.73004	3.21897	4.76548	5.77468	5.09873	7.14095	7.52706	7.93671	5.22577	7.67588	5.03932	2.40566	0.919296	0.373984	0.0268873	0.00507636	29.9998	7.77776	0.77767	0.360484	1	0.0660085	0.931037	15.1496	2.64484e-11	4.41595e-10	yes
ENSG00000127022	CANX	13.7986	15.1853	20.032	20.6088	27.6446	40.8809	118.671	173.669	245.128	506.708	405.562	536.368	398.672	415.222	411.545	325.884	228.155	155.459	0.58092	0.00161283	29.9862	467.521	0.0115731	9.98774	0.954363	0.0630065	0.931016	15.1471	2.65179e-11	4.4205e-10	yes
ENSG00000004961	HCCS	4.39465	5.97454	8.60718	17.5557	25.6262	51.8714	139.417	213.234	200.104	127.097	169.572	166.244	161.384	162.787	120.832	49.48	27.095	14.1107	0.928428	0.00405229	29.992	163.052	1.01788	9.99949	1.01029	0.0667125	0.93099	15.144	2.66046e-11	4.42788e-10	yes
ENSG00000146776	ATXN7L1	0.0307318	0.39119	0.385972	0.589815	0.720849	1.8854	1.61238	2.10698	2.29011	6.7209	7.85844	4.46618	4.01982	3.95863	0.649513	0.410055	0.278208	0	0.0254702	0.0135588	27.2517	7.63162	0.222089	0.00960711	0.999992	0.0661128	0.930833	15.1256	2.71236e-11	4.49793e-10	yes
ENSG00000181192	DHTKD1	0.0921955	0.248939	0.27018	0.27756	0.973146	1.05766	1.32574	3.90181	4.0617	61.6882	52.4054	44.2066	42.3736	40.9139	40.0682	34.6907	14.8176	7.04816	0.0120054	0.00254734	30	53.1384	0.18357	0	1.00349	0.0663466	0.930828	15.125	2.71404e-11	4.49793e-10	yes
ENSG00000169660	HEXDC	0.737564	0.497878	0.424569	0.55512	2.3788	4.41459	7.59611	13.1881	18.3209	24.9033	21.09	27.1384	29.392	26.238	18.2088	15.3361	10.4147	4.2217	0.0471656	0.00215211	30	26.7874	0.408045	0	1.0123	0.0669312	0.930824	15.1245	2.71546e-11	4.49793e-10	yes
ENSG00000143622	RIT1	0.276586	0.817942	1.23511	2.67152	4.00071	8.41531	15.3355	20.7186	17.5431	30.7241	23.67	27.0815	19.035	28.0966	22.6658	8.03708	3.21754	0.294872	0.0901699	0.00438463	25.277	29.6636	1.01112	0	1.00513	0.0664874	0.930765	15.1176	2.73515e-11	4.51049e-10	yes
ENSG00000141582	CBX4	0.860491	1.17357	3.66674	4.57974	11.3534	23.3145	34.6841	33.5165	35.259	62.5283	83.9575	68.6426	73.1607	52.4036	13.7966	2.78837	1.40314	1.33412	0.308482	0.0088465	27.916	83.314	1.84206	0	1.01335	0.0670332	0.930762	15.1172	2.73624e-11	4.51049e-10	yes
ENSG00000176463	SLCO3A1	3.53416	4.40978	4.1299	5.93285	7.56891	12.37	17.9512	33.0873	33.2282	15.302	13.9416	14.4226	12.7688	16.1483	15.4315	10.2787	4.79002	2.08928	0.0923916	0.0024122	30	15.7011	4.34034	0.422194	1	0.0661533	0.930755	15.1164	2.73855e-11	4.51049e-10	yes
ENSG00000177479	ARIH2	4.64051	6.93473	12.7371	18.1455	24.5449	64.3794	110.359	133.598	168.863	160.821	206.402	187.693	187.064	175.145	181.192	146.636	67.5199	25.3985	0.440224	0.00208232	10.2679	197.193	10	3.05471	1.02802	0.0680141	0.930742	15.1148	2.74311e-11	4.51049e-10	yes
ENSG00000011332	DPF1	2.33562	3.98302	2.47022	4.1634	5.04594	16.1868	20.746	35.3894	42.3886	53.7672	42.0853	26.5411	38.2356	33.2863	18.1864	4.53794	1.59667	0.805504	0.246885	0.00705841	30	47.0772	1.20152	0	1.01966	0.0674636	0.930737	15.1143	2.74461e-11	4.51049e-10	yes
ENSG00000278615	C11orf98	0.891223	0.889068	1.92986	3.40011	5.44241	11.1284	19.5277	51.3088	73.1539	57.9077	57.4708	38.887	48.8763	51.0277	39.2619	32.3123	23.0671	10.8887	0.169105	0.00177434	30	52.5795	0	0	1.04954	0.0694626	0.930696	15.1095	2.75859e-11	4.52635e-10	yes
ENSG00000100603	SNW1	17.4864	14.474	18.2951	19.3598	22.9951	35.6846	81.5865	114.713	114.938	245.373	211.302	279.321	233.008	217.918	236.266	166.318	45.9406	15.9087	0.35495	0.00260725	10.7262	263.521	10	0	1.01665	0.0673359	0.930599	15.0982	2.79155e-11	4.57324e-10	yes
ENSG00000040341	STAU2	0.645368	0.355627	0.578958	1.76945	0.901061	1.79343	6.70034	11.5103	13.0493	25.2634	21.8711	18.0638	18.3256	21.2897	17.94	17.7691	5.10451	3.15729	0.0374268	0.00229215	29.9986	22.9095	0.322974	0	1.01896	0.0674972	0.930583	15.0963	2.79716e-11	4.57527e-10	yes
ENSG00000139618	BRCA2	0.184391	0.39119	0.424569	0.83268	1.26149	2.29926	2.50815	4.17493	4.79627	22.443	15.5038	14.4226	13.1945	9.12416	6.76389	4.37392	1.01606	0.266104	0.044529	0.0123115	30	19.2108	0.240044	1.4434	0.999996	0.066285	0.930498	15.0863	2.82659e-11	4.61617e-10	yes
ENSG00000188549	CCDC9B	0	0.0711254	0.115792	0.242865	0.756891	1.93138	2.72313	3.78475	3.62961	2.76037	3.21912	1.64993	2.55377	2.48621	1.25423	0.929458	0.3024	0.129456	0.0243273	0.00645588	30	2.77173	0.0555916	0.193505	1	0.0662939	0.930482	15.0844	2.83224e-11	4.61819e-10	yes
ENSG00000092931	MFSD11	0.368782	1.31582	0.926333	1.59597	5.87492	9.19706	11.5733	12.6028	13.1357	129.797	95.7688	82.8946	64.7427	78.7864	60.1583	41.1422	16.3659	7.90401	0.0851489	0.00672842	26.8237	100.104	1.3758	10	0.989833	0.0656594	0.930403	15.0753	2.85972e-11	4.65303e-10	yes
ENSG00000183978	COA3	0.215123	0.462315	0.501764	0.6939	0.865019	2.98904	7.84693	17.9873	25.0616	29.1039	29.0904	24.6067	28.257	26.3587	24.7039	22.9084	20.9624	10.1731	0.0492693	0.00102071	30	28.4591	0	0	1.02697	0.0681274	0.930395	15.0743	2.86251e-11	4.65303e-10	yes
ENSG00000188070	C11orf95	0.153659	0.426753	0.656153	2.18579	5.62262	16.0489	31.6743	42.5687	44.6355	15.122	17.1371	15.8165	16.2684	10.8862	3.58352	0.574077	1.512	1.22264	0.257918	0.00570922	30	16.7329	0	0	1.04573	0.0693954	0.930351	15.0692	2.8781e-11	4.6711e-10	yes
ENSG00000108788	MLX	0.553173	0.960193	1.62108	3.43481	4.64948	12.6919	23.0033	32.7752	28.648	69.1292	48.7839	57.3492	59.0914	70.8933	45.8915	24.3573	7.2576	1.96342	0.130041	0.00380076	29.4503	67.62	1.55475	0	1.01461	0.0673389	0.930334	15.0673	2.8839e-11	4.67326e-10	yes
ENSG00000167962	ZNF598	2.61221	2.95171	3.58954	3.08786	3.8205	5.05838	12.5407	24.1522	20.8702	12.1216	11.3143	11.7486	11.1373	10.3311	11.6464	8.28311	2.67322	0.909788	0.065672	0.00258503	30	12.6981	2.3686	0	1.01528	0.0673955	0.930311	15.0645	2.89225e-11	4.67779e-10	yes
ENSG00000139697	SBNO1	0.430246	1.88482	4.32289	3.26133	4.61343	9.19706	14.8339	24.8155	19.8332	95.5327	65.8499	82.667	74.1775	62.0347	69.5203	21.1042	3.55622	2.45247	0.100123	0.00462428	29.2367	88.9172	2.014	0	1.01589	0.067441	0.930301	15.0634	2.89565e-11	4.67779e-10	yes
ENSG00000236104	ZBTB22	0	0.0711254	0.463167	0.48573	1.4417	3.95474	6.09122	7.10129	5.61725	24.4833	25.3742	17.182	19.2951	18.2483	17.9176	3.66316	0.314496	0.129456	0.038626	0.00562809	29.9865	25.0975	0.342004	0	1.01504	0.0674037	0.930264	15.0591	2.90884e-11	4.69185e-10	yes
ENSG00000043143	JADE2	0.122927	1.49363	2.89479	4.44096	6.12722	12.6	20.1369	22.9426	21.5616	32.5243	34.9132	39.968	39.1578	33.0208	26.8316	6.36952	2.03213	0.255316	0.112759	0.00495622	29.9789	40.9666	2.48027	0	1.01533	0.0674351	0.93024	15.0563	2.91732e-11	4.69827e-10	yes
ENSG00000165688	PMPCA	1.29074	2.24045	1.85267	3.95523	7.46079	9.65691	13.329	26.6884	32.7961	99.0132	106.444	81.6429	104.917	79.4382	76.8665	77.3364	46.3398	28.6493	0.0777451	0.00186465	25.248	89.8185	2.20919	9.71571	1.00698	0.0669677	0.930072	15.0368	2.97792e-11	4.78629e-10	yes
ENSG00000186283	TOR3A	3.84148	6.33016	5.71239	11.0677	12.0742	31.0861	90.0784	164.656	170.894	48.8465	51.8846	55.7277	63.1585	53.2484	47.4592	37.9711	16.8618	8.34991	0.565504	0.00268057	30	47.9814	1.05488	9.99998	1.06139	0.0705905	0.930063	15.0358	2.98113e-11	4.78629e-10	yes
ENSG00000137822	TUBGCP4	0.522441	0.569003	0.578958	2.70621	2.48693	4.78247	9.13683	21.616	34.6541	71.5895	66.134	46.966	59.4933	54.576	44.0773	34.2259	20.0189	11.3885	0.0897874	0.00252965	30	64.006	0	0	1.00955	0.0672152	0.929923	15.0196	3.03254e-11	4.86137e-10	yes
ENSG00000160094	ZNF362	0.553173	1.42251	1.77547	4.71852	6.92015	7.8175	24.7949	31.6827	38.1109	33.1244	30.7237	40.4516	28.659	26.5035	31.9381	12.6297	1.54829	0.7192	0.144847	0.00370832	28.02	36.403	1.16248	0	1.03196	0.0687314	0.929877	15.0144	3.04946e-11	4.87998e-10	yes
ENSG00000167384	ZNF180	0.706832	2.70277	4.78605	10.8248	12.4346	22.027	26.873	27.4297	28.6048	23.1631	18.581	21.0792	6.73911	4.10346	0.425543	2.7337	0.54432	1.19747	0.491543	0.0192403	24.6942	24.2096	1.70986	0.240312	1.00005	0.0666115	0.929866	15.0131	3.05349e-11	4.87998e-10	yes
ENSG00000136932	TRMO	0.645368	2.02707	3.35796	4.892	7.78517	13.4277	22.0717	27.7028	24.0245	33.0644	48.7602	40.2241	31.8748	41.1794	20.0901	8.61116	1.92326	0.442308	0.151011	0.00559141	7.50181	44.578	0.645366	0	1.01012	0.0673415	0.929752	15	3.09621e-11	4.9407e-10	yes
ENSG00000164087	POC1A	0.891223	0.78238	1.31231	2.70621	3.46008	8.32334	23.4333	26.1031	26.0554	149.96	150.399	99.28	135.326	112.411	102.533	82.0383	20.6237	8.43262	0.119392	0.00374083	29.9923	135.534	0.016939	9.99144	0.990674	0.0661323	0.929579	14.9802	3.16176e-11	5.03761e-10	yes
ENSG00000117625	RCOR3	0.706832	0.746817	1.19651	2.32457	3.27986	4.13868	11.8241	13.9295	13.1789	34.5646	38.3217	43.211	28.0442	29.9311	26.966	20.4481	5.84237	2.53158	0.053266	0.00329404	2.11898	38.6913	0.315392	0	1.00915	0.0674269	0.92946	14.9666	3.20757e-11	5.1002e-10	yes
ENSG00000129292	PHF20L1	0.245855	1.92039	2.54742	4.51035	7.31662	10.9905	28.2346	38.94	50.4256	185.125	106.775	136.972	103.002	109.152	103.9	41.3335	10.2453	2.39134	0.231436	0.00507549	30	152.186	0.395226	0	1.00572	0.0672016	0.929452	14.9657	3.2108e-11	5.1002e-10	yes
ENSG00000138709	LARP1B	0.215123	0.604566	0.231583	2.18579	3.17174	5.88612	10.1043	17.1289	13.7839	12.3616	14.06	10.9521	15.3699	11.5621	10.1906	5.52207	2.17728	1.47436	0.069973	0.00432104	29.3668	13.3817	0.668986	1.07332	1.00001	0.0668324	0.929428	14.9629	3.22031e-11	5.10753e-10	yes
ENSG00000164916	FOXK1	1.22927	2.02707	2.27724	3.92054	6.84807	14.8533	37.7297	44.0514	35.9504	25.9235	18.9597	22.7576	17.6163	19.2621	16.8873	11.0988	1.45152	1.22264	0.260653	0.00625909	30	22.1893	1.04346	2.85098	0.999998	0.0668865	0.929321	14.9507	3.26224e-11	5.1662e-10	yes
ENSG00000178307	TMEM11	1.75171	3.12952	5.21062	10.9289	15.318	47.7787	112.222	102.657	106.252	70.7494	76.1701	70.321	85.8586	53.2002	47.8624	20.9401	5.22547	1.12914	0.769507	0.00678558	30	79.7845	1.67271	5.33322	1.00009	0.0669729	0.929162	14.9327	3.32514e-11	5.25785e-10	yes
ENSG00000128335	APOL2	0.245855	0	0.231583	1.04085	1.00919	3.21897	14.6189	23.801	30.5924	69.7293	63.1516	47.9616	55.3789	65.3174	61.099	43.3565	12.9427	5.69606	0.0885521	0.00246961	29.9945	66.8446	0.000243182	0	1.04804	0.0702605	0.929019	14.9164	3.38302e-11	5.34129e-10	yes
ENSG00000137497	NUMA1	12.7537	23.4358	38.134	61.3061	71.0036	178.055	527.822	824.413	791.816	63.9685	50.5354	41.7602	44.6909	53.6829	42.6215	20.5301	18.6762	12.2336	3.40639	0.0037391	30	45.9193	4.7436	9.65687	1.01862	0.0683266	0.928945	14.9081	3.41334e-11	5.38103e-10	yes
ENSG00000124151	NCOA3	0.706832	0.995756	1.08072	2.67152	4.28905	7.67954	19.3844	17.9093	15.7283	16.9823	19.9065	17.694	14.826	17.3552	12.0944	6.31485	2.1047	0.765948	0.11266	0.00626734	29.9053	18.5334	1.12941	1.84523	0.999989	0.0671095	0.928881	14.9009	3.43954e-11	5.41417e-10	yes
ENSG00000198863	RUNDC1	0.430246	0.355627	1.15792	2.32457	6.84807	15.0372	22.1434	26.1811	33.4442	328.964	194.757	149.603	155.118	146.059	76.0154	15.1994	3.16915	2.11445	0.397736	0.0153908	28.5407	282.655	0.00979556	8.66837	1.02171	0.0686949	0.928634	14.8731	3.54259e-11	5.56799e-10	yes
ENSG00000198625	MDM4	15.2123	23.8626	30.183	41.5993	69.8142	108.847	195.886	221.545	261.375	269.796	138.848	189.258	116.409	148.762	85.8925	35.6474	9.43488	4.57771	1.79004	0.00778314	24.7512	218.862	10	0	0.980955	0.0659905	0.928563	14.8651	3.57313e-11	5.59528e-10	yes
ENSG00000115129	TP53I3	0.307318	0.0711254	0.154389	0.13878	0.216255	1.10365	2.65147	7.49147	10.3703	22.803	31.4338	26.3988	26.1052	22.9794	19.4854	16.5662	10.2453	6.18152	0.0253997	0.00205943	30	27.237	0	0	1.02584	0.0690112	0.92856	14.8648	3.57422e-11	5.59528e-10	yes
ENSG00000185340	GAS2L1	1.84391	2.31158	2.31583	5.20425	13.1555	34.7189	122.541	197.431	202.221	190.525	235.28	207.151	225.465	208.311	205.492	145.843	36.7718	9.45748	0.74942	0.00312299	29.9659	239.994	0.00443918	9.98857	1.00046	0.0673064	0.928556	14.8643	3.57601e-11	5.59528e-10	yes
ENSG00000166326	TRIM44	1.22927	1.5292	2.35443	2.87969	3.89258	8.55327	23.7916	40.3057	39.4936	75.7901	59.7904	78.1724	69.7321	68.914	61.2782	58.9112	21.1801	7.71342	0.125866	0.00228234	29.9793	74.0068	0.279682	2.13223	1.00912	0.0679151	0.928505	14.8586	3.59799e-11	5.62125e-10	yes
ENSG00000105722	ERF	0.6761	1.56476	1.11932	7.59821	13.6601	55.7342	47.0457	59.1124	67.8823	69.2492	66.1813	55.7846	69.9685	54.1415	38.4333	10.224	4.33037	1.42761	0.471731	0.00732038	28.391	73.4055	2.80422	2.86504	1.00106	0.0674313	0.928388	14.8456	3.64826e-11	5.68978e-10	yes
ENSG00000102580	DNAJC3	0.860491	0.284502	0.617555	1.3878	2.27067	3.03503	7.91859	11.3152	10.716	11.4615	8.94726	11.7771	8.65444	11.2724	9.29476	6.31485	3.43526	1.38086	0.0393917	0.00309067	29.7253	10.5011	0.740313	0.979402	0.99998	0.0673654	0.928375	14.8441	3.65395e-11	5.68978e-10	yes
ENSG00000158669	GPAT4	0.860491	1.70701	2.27724	4.96139	7.02828	14.5314	47.2607	63.2873	70.8638	114.195	138.659	96.8905	138.447	115.549	109.275	76.3796	24.6396	7.41855	0.258585	0.00312558	27.8179	123.297	0.122665	9.81889	1.02959	0.0693652	0.928365	14.843	3.65818e-11	5.68978e-10	yes
ENSG00000051108	HERPUD1	2.21269	0.569003	1.81407	9.15948	11.1732	21.981	40.3095	36.5599	29.4257	160.581	147.417	164.395	99.4551	133.918	45.9138	14.3246	2.14099	3.61038	0.304507	0.00852335	20.8633	174.654	1.39088	0	1.00518	0.0677511	0.928305	14.8363	3.68453e-11	5.72224e-10	yes
ENSG00000136731	UGGT1	0.553173	0.604566	0.887736	1.76945	1.62191	3.03503	6.19871	6.9062	7.216	41.2255	28.3093	25.9437	22.4401	22.7621	15.1628	14.3246	7.75354	4.29722	0.079004	0.0130556	29.9984	28.9825	0.424274	8.122	1.00015	0.0674661	0.928199	14.8245	3.73132e-11	5.78632e-10	yes
ENSG00000180758	GPR157	0.614637	0.640129	0.308778	1.17963	2.23463	4.50656	7.48862	7.84263	7.95057	50.3467	23.4096	28.2479	17.0015	15.5449	6.78629	0.628751	0.435456	0.352408	0.151718	0.0215856	30	44.4687	0.048927	1.13834	0.999999	0.0674748	0.928162	14.8203	3.74798e-11	5.80354e-10	yes
ENSG00000139746	RBM26	2.95026	10.6688	22.425	26.4723	42.3499	86.7743	175.212	198.173	173.141	167.602	160.08	140.187	87.4666	131.359	98.0093	42.3997	8.57606	4.57771	1.62909	0.0094531	29.8135	159.534	9.97193	10	1.00212	0.0676575	0.928084	14.8117	3.78289e-11	5.84663e-10	yes
ENSG00000117682	DHDDS	0.245855	0.746817	0.463167	2.35926	1.33357	4.23065	16.1238	22.2793	20.5678	110.175	92.9994	97.6586	111.467	93.5589	98.7484	69.354	15.3861	6.31098	0.0750572	0.0027381	29.968	112.505	0.490536	0	1.0302	0.069558	0.928074	14.8107	3.787e-11	5.84663e-10	yes
ENSG00000162702	ZNF281	1.4444	2.56052	6.9475	12.6984	14.3449	35.4547	61.3422	54.9375	47.9627	121.156	109.545	138.565	74.5322	90.252	33.0356	3.22577	1.66925	1.15072	0.505814	0.00950631	27.8711	135.719	3.60117	0	1.01078	0.0682729	0.928023	14.805	3.81014e-11	5.87369e-10	yes
ENSG00000171425	ZNF581	0.184391	0.640129	1.73687	4.1634	9.51521	36.9722	26.9805	42.0225	31.8887	366.169	237.315	159.332	169.542	166.697	52.409	12.7117	3.55622	1.30535	0.60849	0.0171534	30	330.957	0	7.27282	1.00615	0.0679739	0.927997	14.802	3.82211e-11	5.88345e-10	yes
ENSG00000188917	TRMT2B	0.307318	0.640129	0.385972	1.52658	1.51378	2.29926	6.66451	16.9338	21.432	115.575	76.9275	94.1596	82.2408	79.6554	84.8398	55.7675	20.9503	11.2267	0.0630086	0.00274135	30	99.7544	1.80463e-07	0	1.02473	0.0692371	0.927981	14.8003	3.82899e-11	5.88539e-10	yes
ENSG00000092201	SUPT16H	4.94782	4.90765	6.60012	9.12479	12.5428	19.6817	52.707	87.0103	103.962	159.021	123.439	152.334	118.443	119.314	135.748	108.419	63.8548	34.9891	0.279724	0.00190131	29.9987	136.192	0.0307606	9.99524	0.972161	0.0656976	0.927956	14.7975	3.84065e-11	5.89464e-10	yes
ENSG00000120696	KBTBD7	0.184391	0.533441	1.23511	2.94908	3.02757	8.09341	17.7004	15.5292	11.6234	29.824	24.8772	27.8781	15.3935	18.5863	6.51753	0.027337	0.145152	0.204972	0.163009	0.0112274	30	31.2367	0.350786	0	1.01015	0.0682799	0.927926	14.7942	3.85413e-11	5.90289e-10	yes
ENSG00000164073	MFSD8	1.10635	4.33865	3.62814	5.37773	9.58729	22.1649	35.0424	46.1974	41.3516	201.447	184.91	186.669	87.6084	98.0003	111.335	55.5214	11.3823	8.06942	0.316539	0.00757653	29.9518	183.502	2.20955	9.99483	0.993901	0.0671852	0.927919	14.7935	3.85733e-11	5.90289e-10	yes
ENSG00000137776	SLTM	6.761	8.49949	10.3055	15.9597	28.7258	34.0291	94.8081	131.725	113.598	516.369	350.174	451.425	286.566	278.021	283.837	148.276	63.5766	24.1004	0.630408	0.00515438	29.9194	436.722	6.98937	10	0.986034	0.066666	0.927894	14.7907	3.86887e-11	5.90909e-10	yes
ENSG00000044574	HSPA5	12.9688	15.292	23.1969	30.5663	34.4205	63.6896	188.434	297.279	318.973	260.915	337.013	284.157	327.379	291.949	292.662	234.305	133.576	64.4511	0.881902	0.0018965	23.308	313.324	4.76459	10	0.988187	0.0668157	0.927886	14.7897	3.87268e-11	5.90909e-10	yes
ENSG00000132434	LANCL2	0.276586	0.533441	0.501764	1.4225	1.33357	3.03503	5.87624	11.4323	14.216	18.3024	14.4387	15.5605	12.7688	16.2932	16.8425	10.3607	7.14874	2.73296	0.0355458	0.0018928	29.7535	16.8688	0.38438	0	1.01958	0.068968	0.927827	14.7833	3.89948e-11	5.94131e-10	yes
ENSG00000278311	GGNBP2	0.307318	0.889068	1.04212	3.05316	7.24453	13.0138	28.7721	28.3271	27.4381	11.1015	9.49167	9.21683	10.0968	10.7655	7.4582	2.56968	0.749952	0.801908	0.234814	0.00808793	29.9999	10.6853	0.509902	1.5425	1	0.0676552	0.927805	14.7808	3.90982e-11	5.94177e-10	yes
ENSG00000123545	NDUFAF4	0.245855	0.0711254	0.424569	0.6939	2.41484	4.32262	14.4398	19.2749	18.4505	26.0435	35.7654	34.6769	31.7566	35.507	25.8909	14.3793	3.29011	1.26579	0.0785025	0.00348906	30	35.9374	0.101407	0	1.02237	0.0691701	0.927802	14.7805	3.91116e-11	5.94177e-10	yes
ENSG00000106105	GARS	2.24342	2.24045	2.85619	3.71237	4.72156	6.5759	17.3062	25.2837	39.6232	45.7261	51.8846	55.7846	52.9197	41.6863	49.9901	39.666	24.6637	10.8024	0.0837192	0.00161423	30	53.2475	1.92555	0	1.02509	0.0693678	0.927775	14.7776	3.92349e-11	5.95186e-10	yes
ENSG00000197498	RPF2	2.73513	3.27177	5.24922	6.2451	8.50602	15.0372	35.4007	64.4579	93.5056	349.067	230.522	290.444	231.116	242.804	247.173	183.486	58.9317	18.6848	0.268766	0.00279156	30	299.895	0.83498	0	1.02063	0.0690971	0.927715	14.771	3.95137e-11	5.98546e-10	yes
ENSG00000196498	NCOR2	5.37807	6.97029	5.28782	15.7515	26.0226	61.8042	60.5897	110.343	117.055	40.1454	28.7354	26.0006	30.1014	31.1139	22.9345	20.4754	10.1123	4.93731	0.468976	0.00394246	19.0524	29.2304	6.17418	5.39734	1	0.0677118	0.927693	14.7685	3.96198e-11	5.98607e-10	yes
ENSG00000055211	GINM1	0.430246	0.248939	0.617555	0.589815	1.15336	2.43722	5.87624	14.0075	15.7283	38.0451	28.0726	34.7622	35.9419	24.5242	30.7511	21.9243	6.70118	2.53878	0.0489189	0.00268925	30	35.8719	0	0	1.03374	0.0699979	0.92769	14.7682	3.96322e-11	5.98607e-10	yes
ENSG00000205336	ADGRG1	24.186	30.4061	36.127	72.2003	127.554	225.374	668.422	1205.81	1434.04	1738.13	1365.9	1933.63	1372.86	1454.87	1404.54	1242.79	673.336	369.417	3.74967	0.00183178	30	1674.31	2.69447e-09	9.67371	1.00249	0.0678935	0.927667	14.7656	3.97408e-11	5.99381e-10	yes
ENSG00000125817	CENPB	0.491709	0.604566	1.58249	3.08786	4.54135	9.88684	37.2639	55.6398	53.9688	41.1055	42.7717	37.8061	42.7993	49.0967	39.5083	26.7629	5.38272	1.98499	0.204286	0.00300868	30	47.3985	0.061609	0	1.01861	0.0689921	0.927654	14.7642	3.98031e-11	5.99455e-10	yes
ENSG00000076248	UNG	3.10392	3.98302	8.37559	14.1556	13.7322	29.3386	65.9285	121.034	141.123	84.9713	112.669	95.6957	90.2804	100.8	98.0093	74.7667	34.5704	14.2258	0.393722	0.00224146	29.3353	95.1962	3.82517	9.96008	1.04177	0.0706003	0.927578	14.7558	4.01603e-11	6.03925e-10	yes
ENSG00000116863	ADPRHL2	0.430246	0.675692	1.27371	2.87969	2.8834	7.72553	18.0945	25.7909	24.6295	80.4707	52.7131	36.5259	58.311	53.6105	36.3055	14.598	1.29427	0.532208	0.151625	0.0059672	30	67.1966	0.0732343	0	1.00831	0.0683387	0.927566	14.7546	4.02154e-11	6.03925e-10	yes
ENSG00000204946	ZNF783	0.153659	0.106688	0.347375	1.56128	1.1894	3.03503	4.98047	5.73566	5.53083	9.12122	12.2847	7.53845	9.97861	6.20347	2.28449	1.53087	0.931392	0.158224	0.0484298	0.00895228	29.9893	10.9741	0.26624	0.236561	1.00001	0.0678068	0.927506	14.748	4.05006e-11	6.07335e-10	yes
ENSG00000104679	R3HCC1	0.33805	0.426753	0.501764	1.31841	1.87421	2.48321	5.4821	14.2416	16.8517	19.6226	14.5807	19.4577	17.0488	15.1828	16.5514	13.9145	6.79795	2.32661	0.0430532	0.00191889	30	18.6216	0.131503	0	1.0337	0.0700991	0.92749	14.7462	4.05762e-11	6.07597e-10	yes
ENSG00000002919	SNX11	0.153659	0.711254	0.926333	1.07555	2.34276	4.78247	8.38439	8.81809	12.4444	29.764	35.718	30.8934	39.8672	22.3518	19.239	8.28311	1.28218	0.514228	0.057131	0.00520086	29.9544	36.3395	0.578149	0	1.01505	0.0688678	0.927425	14.7391	4.08885e-11	6.11396e-10	yes
ENSG00000161888	SPC24	0.983419	0.960193	1.00353	2.7756	2.66714	6.94378	22.7525	41.4762	58.1169	213.748	190.378	173.584	163.441	209.807	198.281	159.375	93.5505	55.4539	0.130329	0.00149738	30	204.6	0	0	1.01882	0.0691405	0.927392	14.7355	4.10489e-11	6.12919e-10	yes
ENSG00000008952	SEC62	3.16538	4.87209	8.83876	19.8455	26.4912	45.7094	88.8602	226.11	291.06	583.938	490.916	636.246	457.432	570.815	529.152	326.595	104.606	42.4508	0.860604	0.00278402	29.8813	594.21	0.438938	9.93636	1.04209	0.0707508	0.927334	14.7291	4.13304e-11	6.16241e-10	yes
ENSG00000111247	RAD51AP1	1.22927	1.95595	2.779	4.82261	4.90177	13.9795	76.5702	119.668	119.042	450.24	340.422	516.825	389.497	360.091	372.171	228.947	78.4184	12.7047	0.442929	0.00307495	30	457.561	0	0	1.03729	0.0704571	0.927272	14.7223	4.1632e-11	6.1934e-10	yes
ENSG00000108312	UBTF	9.89565	8.3928	13.6634	33.5848	50.2432	134.553	304.167	566.738	544.744	234.211	166.968	179.358	176.139	206.452	193.936	128.703	50.3798	15.5024	2.00338	0.0029906	29.7983	207.234	3.08232	9.54342	1.00514	0.0682755	0.927267	14.7218	4.16567e-11	6.1934e-10	yes
ENSG00000102858	MGRN1	0.553173	1.03132	0.96493	2.46335	4.97386	5.79415	13.4007	22.2013	21.2159	49.1466	43.3871	48.6444	50.4133	50.9795	43.6741	40.1034	11.4307	3.37664	0.0650979	0.00232256	25.496	52.9303	1.31172	0	1.03233	0.0701353	0.927242	14.7191	4.17763e-11	6.20236e-10	yes
ENSG00000148229	POLE3	7.92881	13.6561	22.9267	27.2703	44.188	92.5224	218.782	461.35	578.058	612.082	807.1	715.328	763.104	777.05	711.284	575.389	233.816	112.037	1.50674	0.00199725	29.9916	781.44	0.0122221	9.99053	1.0317	0.0701294	0.927171	14.7114	4.2126e-11	6.2454e-10	yes
ENSG00000227057	WDR46	0.6761	0.817942	0.887736	1.45719	1.94629	4.78247	13.4723	24.8935	35.9504	41.5855	39.2922	29.3573	34.6887	38.3553	29.5192	31.1915	18.2045	12.2228	0.0785207	0.00143408	30	38.2008	2.55902e-06	0	1.01415	0.0689526	0.92714	14.7079	4.22825e-11	6.25972e-10	yes
ENSG00000203879	GDI1	0.276586	0.213376	0.424569	0.62451	0.468552	2.62116	4.04887	12.1736	12.4012	43.8058	48.9969	43.5239	36.7459	51.1967	39.2619	27.8017	6.90682	4.4986	0.0406281	0.00279766	30	49.102	0	0	1.03478	0.0704395	0.926978	14.6904	4.30883e-11	6.37e-10	yes
ENSG00000149187	CELF1	12.8459	26.5653	39.4849	52.9793	71.5443	205.278	327.887	315.539	269.412	788.685	654.807	695.785	552.56	615.664	493.764	278.646	99.3324	34.1908	1.55118	0.00448473	0	750.234	10	10	0.986448	0.0671581	0.92696	14.6885	4.31779e-11	6.37423e-10	yes
ENSG00000182504	CEP97	0.122927	0.320064	0.656153	0.381645	1.29753	2.89707	8.31272	8.31085	8.25303	21.7229	16.2376	19.7138	9.19829	10.1138	8.48846	1.94093	0.653184	0.12586	0.0799534	0.0098037	30	20.3992	0	0.233549	1.01224	0.0689435	0.926902	14.6821	4.3474e-11	6.40593e-10	yes
ENSG00000179029	TMEM107	0.921955	1.03132	1.19651	2.15109	3.71237	5.24232	26.1206	45.9243	44.4627	89.1119	59.0803	78.3146	75.3125	58.414	61.2782	37.1236	26.466	8.0874	0.174238	0.00337081	29.8374	70.9664	0	8.40207	1.02732	0.0699749	0.926894	14.6812	4.35152e-11	6.40593e-10	yes
ENSG00000157014	TATDN2	1.96684	3.20064	2.31583	4.8573	8.5781	19.0379	52.4203	71.247	59.2404	84.6113	85.7327	82.1834	99.2659	87.2347	74.9404	52.6511	18.7972	8.31395	0.278847	0.00353912	29.2999	87.5189	0.104721	9.53612	0.991402	0.0675392	0.926872	14.6789	4.36246e-11	6.4105e-10	yes
ENSG00000139644	TMBIM6	23.0489	32.8599	45.1973	57.8713	83.2581	146.049	276.255	531.582	737.199	2887.4	3182.95	3284.83	2792.12	3379.08	3215.49	2741.3	1684.97	1057.86	1.52549	0.00128079	10.9423	3306.39	4.12883	0	1.01006	0.0688187	0.926855	14.6771	4.37113e-11	6.4105e-10	yes
ENSG00000069329	VPS35	3.74928	3.48515	3.82112	5.68998	7.06432	12.6919	28.3421	43.5442	63.1292	180.684	142.635	168.918	161.147	166.432	176.712	144.285	83.8253	51.6925	0.129512	0.00138117	30	176.55	3.35575	0	1.01776	0.0693452	0.926852	14.6767	4.37303e-11	6.4105e-10	yes
ENSG00000185651	UBE2L3	1.56732	0.746817	2.08425	4.05932	4.97386	8.69122	21.7134	52.5573	57.1663	151.04	135.203	122.038	132.016	164.235	118.055	110.223	46.5212	15.7181	0.164994	0.00224295	29.8498	146.953	0.0263351	4.28413	1.02816	0.0701798	0.926609	14.6504	4.4985e-11	6.5852e-10	yes
ENSG00000130508	PXDN	5.68539	9.49524	7.71944	11.2412	15.9668	26.5335	37.2998	49.7871	57.6416	122.116	154.873	111.854	142.704	138.142	106.677	83.3232	44.1504	43.846	0.146197	0.00229842	21.4326	131.06	9.01971	10	0.993557	0.0678644	0.926515	14.6403	4.5478e-11	6.64517e-10	yes
ENSG00000104524	PYCR3	0.368782	0.284502	0.27018	0.48573	1.47774	1.79343	4.19219	7.99871	7.17279	90.7921	65.9446	52.2856	65.0265	63.2174	49.8557	42.5637	15.6885	7.53362	0.0269383	0.00306205	23.7575	74.4594	0.169204	0	1.0002	0.0683223	0.926507	14.6394	4.55218e-11	6.64517e-10	yes
ENSG00000148343	MIGA2	0.184391	0.248939	0.926333	2.18579	2.16255	6.75984	19.7069	21.0698	18.4505	40.0253	30.1792	18.9457	24.1662	26.7932	14.5133	7.54501	3.87072	0.381176	0.159631	0.00786518	30	32.9453	0	1.75772	1.00962	0.0690046	0.92643	14.6312	4.59291e-11	6.69528e-10	yes
ENSG00000139405	RITA1	1.56732	1.49363	1.15792	1.63067	2.59506	12.0941	24.0424	57.4736	58.8947	96.0128	111.58	83.5488	114.163	116.176	91.6037	61.1529	28.607	11.2447	0.183901	0.00246241	30	112.077	0	0	1.03035	0.0704398	0.926395	14.6274	4.61182e-11	6.71347e-10	yes
ENSG00000254999	BRK1	9.92638	10.6333	10.923	13.0453	10.9929	19.1759	29.3812	40.4617	55.4379	109.515	100.195	88.271	96.2392	92.883	86.654	83.5419	52.545	59.3448	0.0920136	0.00109364	28.2857	90.5292	10	9.62129	0.98258	0.0672026	0.926336	14.6211	4.64314e-11	6.74966e-10	yes
ENSG00000166037	CEP57	2.30489	3.02283	4.1685	5.51651	7.02828	12.6	51.5246	93.4093	106.166	360.168	287.117	408.812	333.905	331.004	328.788	226.022	68.6448	17.1925	0.321808	0.0027612	13.6691	370.865	1.98675	8.73805	1.07842	0.0738286	0.926205	14.6071	4.71424e-11	6.8435e-10	yes
ENSG00000235173	HGH1	0	0	0	0.104085	0.360424	0.551824	1.00326	3.62868	3.67282	25.9835	29.6585	27.1384	24.7101	28.6518	24.1216	23.7285	10.8622	5.83631	0.00957332	0.00175434	29.7561	29.0997	0	0	1.03389	0.0708233	0.926121	14.5982	4.75994e-11	6.89274e-10	yes
ENSG00000125266	EFNB2	0.245855	1.42251	1.3895	3.74706	4.03675	7.90947	13.1857	10.3788	10.1975	84.3712	40.4284	36.4122	35.5163	32.2484	14.6476	3.00707	0.919296	0.338024	0.199779	0.0200384	30	71.0563	0.814841	3.11988	1	0.0685031	0.926119	14.5979	4.76134e-11	6.89274e-10	yes
ENSG00000075856	SART3	1.96684	1.38695	2.7018	4.40627	8.39789	8.27735	32.5343	41.2421	43.8145	231.211	143.014	208.545	156.324	144.949	154.83	88.8179	16.8981	3.82255	0.184648	0.0039136	30	194.239	1.35689	5.26224	1.03046	0.0705963	0.926106	14.5966	4.76827e-11	6.89322e-10	yes
ENSG00000162139	NEU3	0.276586	0.320064	1.46669	1.63067	4.79365	10.3927	31.1011	44.5586	40.4442	26.2835	14.9594	15.1054	16.765	18.7069	12.184	4.18256	0.72576	0.86304	0.222232	0.00494231	30	21.0654	0	0	1.0358	0.070972	0.926087	14.5945	4.77881e-11	6.89892e-10	yes
ENSG00000134014	ELP3	1.41366	4.83653	6.21415	9.50643	13.7322	21.6591	44.6451	74.8367	69.6539	262.955	254.95	284.555	209.314	235.852	250.063	184.251	73.1566	37.3193	0.239882	0.00240476	29.956	265.298	0.00445306	9.99777	0.955205	0.065482	0.926019	14.5873	4.81649e-11	6.94372e-10	yes
ENSG00000114353	GNAI2	7.92881	6.43685	5.36501	9.81869	17.1922	34.9948	89.9351	162.12	240.634	577.217	699.946	569.537	661.946	675.623	553.833	558.085	362.324	188.851	0.511487	0.00135478	29.1238	658.667	0.0950718	7.66991	1.0116	0.0693721	0.925971	14.5822	4.84327e-11	6.97271e-10	yes
ENSG00000106299	WASL	0.0614637	0.284502	0.424569	0.48573	1.65795	2.34525	7.59611	9.36434	6.52465	9.42126	11.5036	9.89956	6.85734	7.53106	6.11438	1.91359	0.278208	0.104284	0.0526086	0.0063012	30	10.9167	0.07932	0	1.00318	0.0688434	0.925874	14.5719	4.89774e-11	7.04143e-10	yes
ENSG00000105771	SMG9	0.614637	0.78238	0.463167	1.04085	1.94629	4.87444	7.45279	13.9685	14.6913	8.2811	7.3377	5.34804	6.479	6.75864	4.05386	4.48327	2.84256	1.60741	0.0514432	0.00311824	30	6.16962	0.5136	1.09329	1	0.0686496	0.925826	14.5667	4.925e-11	7.06915e-10	yes
ENSG00000255154	HTD2	0.460977	1.38695	3.58954	2.84499	5.62262	20.4175	25.619	25.4008	36.1664	644.126	354.34	329.672	286.59	313.191	178.191	34.6086	4.2457	1.30535	0.378052	0.0129139	29.7045	540.665	0.00328507	9.95906	0.992669	0.0681511	0.925816	14.5657	4.93055e-11	7.06915e-10	yes
ENSG00000104221	BRF2	0.215123	0.995756	2.08425	5.41242	9.91167	18.2562	28.8079	33.3605	26.4011	15.4221	22.1788	17.4665	14.3768	10.7897	2.64285	1.83158	0.653184	1.0752	0.314837	0.0107649	30	20.3344	1.15803	0.404898	1	0.068672	0.925781	14.562	4.95049e-11	7.08802e-10	yes
ENSG00000258643	BCL2L2-PABPN1	15.0586	15.5053	23.1583	30.8092	54.6764	105.812	140.564	350.07	540.293	719.316	656.606	687.792	640.996	640.936	722.93	578.26	290.897	115.928	1.18941	0.00172008	29.6384	720.931	5.918	9.20282	1.03647	0.071302	0.925539	14.5364	5.09005e-11	7.26893e-10	yes
ENSG00000144283	PKP4	1.41366	1.88482	5.67379	6.73083	8.14559	12.2781	36.1532	49.9431	51.5923	113.235	70.7023	92.4812	78.1737	78.183	76.8889	61.3442	25.3048	4.99125	0.170277	0.00266537	12.3088	95.9914	1.41584	0	1.01534	0.0698489	0.925538	14.5363	5.09076e-11	7.26893e-10	yes
ENSG00000172260	NEGR1	3.3805	2.20489	2.31583	2.8103	4.72156	5.47225	23.4691	39.1351	41.7405	63.7285	57.3761	53.5373	46.2279	64.9071	52.7225	42.3723	28.7764	12.1473	0.107631	0.00175677	30	61.0286	1.79298	0	1.00913	0.0694443	0.925493	14.5315	5.11703e-11	7.28997e-10	yes
ENSG00000101193	GID8	3.41123	4.12527	4.47728	8.04924	10.4523	24.3722	75.2803	79.9871	74.7094	168.983	174.779	157.909	164.694	166.287	150.844	95.9255	23.6114	6.0269	0.34698	0.00353959	29.9919	176.747	0.0344773	9.99178	0.984013	0.0677178	0.925488	14.5311	5.11944e-11	7.28997e-10	yes
ENSG00000174738	NR1D2	0.0307318	0.462315	0.578958	0.867375	1.47774	1.93138	8.45605	12.7979	11.2777	8.46113	9.13662	10.4685	6.43171	9.43796	6.04719	3.22577	0.157248	0.104284	0.0561519	0.00429641	30	9.84371	0	0	1.02963	0.0708822	0.925439	14.5259	5.14839e-11	7.30991e-10	yes
ENSG00000181588	MEX3D	0.430246	0.426753	0.463167	1.56128	2.91944	7.72553	22.8958	34.1798	27.9134	43.0857	32.0492	39.4844	26.6727	41.3725	24.7711	16.0195	1.83859	1.3521	0.148467	0.00434235	30	41.2942	0	0	1.01454	0.0698478	0.925431	14.525	5.15326e-11	7.30991e-10	yes
ENSG00000169398	PTK2	4.33319	8.57061	15.1301	34.2787	39.8269	57.2517	79.3292	84.0449	69.049	112.695	93.6859	101.783	87.5138	72.414	66.4071	52.2683	17.7932	7.43653	0.450033	0.00579545	0	101.027	9.53135	10	0.969759	0.0667685	0.925423	14.5242	5.15798e-11	7.30991e-10	yes
ENSG00000145332	KLHL8	1.50586	1.67145	2.47022	5.16956	8.10955	14.3014	41.7069	50.7625	57.3824	624.323	363.642	360.31	312.198	407.691	259.626	50.7921	4.71744	2.49203	0.399928	0.00771733	30	520.589	0	0	1.01098	0.069611	0.925415	14.5233	5.16297e-11	7.30991e-10	yes
ENSG00000181830	SLC35C1	1.32147	0.675692	2.00705	3.60828	7.06432	18.5321	33.4659	34.2579	30.1603	99.5533	101.45	83.6626	101.229	99.1348	76.7545	32.6951	4.37875	1.6146	0.158478	0.00428766	22.4613	109.742	2.12646	0	1.021	0.0703091	0.925398	14.5216	5.17265e-11	7.30991e-10	yes
ENSG00000159023	EPB41	2.39708	4.51646	5.05623	9.95747	17.3004	20.6474	55.0001	88.8442	92.771	171.983	159.465	130.629	119.129	139.807	154.651	112.136	36.663	19.4004	0.276259	0.00234806	29.9742	161.63	5.00589	0	1.01784	0.0700938	0.925394	14.5211	5.1754e-11	7.30991e-10	yes
ENSG00000203727	SAMD5	0.706832	2.02707	2.27724	3.29603	4.28905	10.2547	22.2867	35.5455	56.475	92.5923	62.3231	63.8066	69.3774	50.4243	57.3811	36.2215	8.91475	3.5924	0.181771	0.00347808	30	76.5625	0	0	1.02539	0.0706304	0.925361	14.5177	5.19477e-11	7.32736e-10	yes
ENSG00000162065	TBC1D24	0.276586	0.960193	1.04212	2.56743	1.58587	7.12772	26.658	35.7015	27.4381	38.4051	49.2099	44.0644	41.1204	26.4794	25.7342	11.0715	2.86675	0.949344	0.179665	0.00539469	30	46.5646	0	0	1.01549	0.0699745	0.925309	14.5122	5.22556e-11	7.36086e-10	yes
ENSG00000186130	ZBTB6	0.0307318	0	0.656153	0.83268	2.01838	2.75912	4.15636	5.89173	5.22836	8.82118	8.09514	6.77039	2.86117	2.02759	0.156779	0	0.06048	0.165416	0.091601	0.0193504	29.4096	9.51559	0.0153629	0	1.01641	0.0700581	0.92527	14.5081	5.2491e-11	7.38407e-10	yes
ENSG00000055609	KMT2C	0.768296	2.3827	3.93692	7.52882	13.3357	15.773	34.075	38.862	34.222	78.5505	47.8607	55.5001	41.1204	62.5898	33.5507	13.2038	2.69741	1.89869	0.238339	0.00641556	15.2844	67.696	1.44676	0.608438	0.998715	0.0688819	0.925182	14.4989	5.30174e-11	7.44809e-10	yes
ENSG00000183943	PRKX	2.58147	3.20064	6.25275	9.57582	9.58729	24.2802	59.3357	59.1904	42.6047	207.628	135.369	156.202	107.873	112.893	86.9676	23.4551	3.10867	1.93105	0.4367	0.00837322	28.9493	184.132	2.70925	1.11163	0.999445	0.0689413	0.925164	14.497	5.31268e-11	7.45344e-10	yes
ENSG00000166289	PLEKHF1	0	0.0711254	0.154389	0.55512	0.28834	1.70146	2.61564	1.63876	2.03085	4.80064	2.91141	2.90159	2.22272	1.52069	0.179176	0.191359	0.374976	0.061132	0.0384294	0.0188966	29.9818	4.46811	0	0.104164	1.00367	0.0692671	0.925096	14.4899	5.35417e-11	7.49502e-10	yes
ENSG00000141391	PRELID3A	0.245855	0.142251	0.308778	1.17963	3.02757	3.40291	10.3192	15.3731	25.4505	28.6238	22.0368	24.1231	24.0716	25.5863	18.3207	6.4242	4.89888	4.7647	0.0791232	0.00335606	30	26.8508	0	0	1.01733	0.0702114	0.925092	14.4895	5.35666e-11	7.49502e-10	yes
ENSG00000166855	CLPX	0.706832	0.39119	0.849139	1.24902	2.1265	3.72481	11.3942	16.7388	14.432	32.3443	22.0604	29.4426	21.305	22.207	22.2626	16.1288	3.71347	1.05722	0.0605805	0.00332943	25.4535	28.8465	0.3799	0	1.01313	0.0699612	0.925013	14.4812	5.40498e-11	7.54838e-10	yes
ENSG00000160062	ZBTB8A	0.215123	0.746817	1.54389	2.1164	4.0728	10.7606	19.0619	23.9571	24.5863	149.66	79.8626	75.2708	65.3103	83.1071	35.768	8.00974	1.512	0.877424	0.271932	0.0124401	30	124.003	0	2.55635	1.01332	0.0699829	0.924997	14.4795	5.41522e-11	7.54838e-10	yes
ENSG00000167693	NXN	0.368782	0.142251	0.69475	0.83268	1.15336	2.57518	8.67103	16.0754	18.0616	28.4438	28.9247	30.5521	27.1456	21.2897	26.3837	24.7126	8.68493	3.73984	0.0505025	0.00204513	29.8255	30.0226	3.8034e-09	0	1.02485	0.0707803	0.924995	14.4793	5.41646e-11	7.54838e-10	yes
ENSG00000145388	METTL14	0.430246	2.73833	2.35443	3.26133	6.01909	7.95546	14.5831	16.7388	11.6234	61.5682	38.2507	41.4757	31.2837	27.4449	24.8159	3.49914	0.471744	0.334428	0.138095	0.00996687	10.2384	53.5115	0.430189	0.52337	1	0.0691088	0.924905	14.4699	5.47214e-11	7.61582e-10	yes
ENSG00000165526	RPUSD4	0.921955	0.533441	1.23511	3.15725	4.0728	8.96713	32.1401	35.2723	37.0738	65.2287	56.9737	46.4255	54.7405	42.4829	55.0966	28.6765	3.70138	1.86632	0.15841	0.00363364	25.5539	61.7068	0.252019	0	1.01417	0.0701072	0.924867	14.466	5.49559e-11	7.63829e-10	yes
ENSG00000067369	TP53BP1	3.74928	7.50373	6.83171	9.81869	14.8855	26.1196	59.0132	68.4377	56.1725	63.1284	57.7548	45.0316	50.4369	54.8415	48.9822	27.9384	17.9142	7.43653	0.315599	0.00497893	29.557	52.609	6.30493	10	0.975634	0.0674498	0.924853	14.4646	5.50409e-11	7.63994e-10	yes
ENSG00000146457	WTAP	1.22927	1.60032	2.39303	4.54505	3.89258	14.5314	38.088	39.4863	31.9751	110.535	134.801	116.462	101.938	120.569	75.5003	26.7356	4.39085	1.57145	0.204041	0.00516283	29.8064	133.664	1.56506	0	1.01656	0.0702984	0.924816	14.4607	5.52754e-11	7.66232e-10	yes
ENSG00000135972	MRPS9	1.04488	1.13801	1.27371	2.15109	2.84735	5.42626	15.3714	35.5455	40.2714	75.4901	54.3463	66.1108	51.1699	62.9278	61.8829	44.5046	28.5587	10.9354	0.106227	0.0018978	30	67.1979	4.37452e-06	0	1.01683	0.0704138	0.924624	14.4407	5.64936e-11	7.82052e-10	yes
ENSG00000118873	RAB3GAP2	0.614637	2.84502	3.89832	5.72468	6.92015	12.554	14.5473	19.1189	14.4752	102.674	64.051	57.719	58.9495	48.6622	43.4502	22.4437	5.05613	2.07489	0.127447	0.00879704	25.852	79.6935	2.78621	6.106	1.00028	0.0692738	0.924612	14.4396	5.65663e-11	7.82052e-10	yes
ENSG00000115825	PRKD3	0.430246	0.569003	1.85267	2.0817	3.38799	5.42626	11.3225	17.246	16.8517	29.764	17.5631	23.8955	19.9572	26.8897	16.753	9.78665	4.5239	1.58943	0.0698408	0.00367873	13.614	26.0743	0.309973	0	1.00196	0.0694062	0.92458	14.4362	5.67738e-11	7.8351e-10	yes
ENSG00000124659	TBCC	1.26001	2.63164	5.63519	11.033	18.706	36.5583	41.7428	43.076	40.617	42.1256	48.3578	36.5544	46.961	20.9759	5.30809	0.738099	0.810432	0.95294	0.498356	0.0118338	19.896	51.9041	1.94582	0	1.00252	0.0694485	0.924573	14.4354	5.68217e-11	7.8351e-10	yes
ENSG00000182872	RBM10	1.22927	3.98302	4.1685	7.35534	13.8403	24.4642	59.9089	112.216	161.085	180.264	131.416	115.95	112.839	141.545	102.399	96.6636	40.9812	18.9581	0.428929	0.00232768	30	145.952	0	0	1.03204	0.0715188	0.924523	14.4303	5.71411e-11	7.85438e-10	yes
ENSG00000272617	COG8	2.15123	2.06264	4.51587	6.86961	9.65938	21.7051	64.137	74.0953	71.7279	53.1671	61.4	39.8542	46.7245	48.6863	48.4895	22.4163	7.62048	2.17558	0.363977	0.00452529	30	54.5768	2.04486	3.59495	1.00098	0.069368	0.92452	14.43	5.71597e-11	7.85438e-10	yes
ENSG00000007392	LUC7L	4.17953	3.73408	3.39655	10.235	17.4085	42.4904	123.616	181.98	214.104	247.413	139.274	210.963	158.523	133.266	139.914	85.4555	32.4657	6.49438	0.830976	0.00368782	30	201.189	0	0	1.022	0.0708269	0.924516	14.4296	5.7187e-11	7.85438e-10	yes
ENSG00000065802	ASB1	0.368782	1.5292	4.1299	7.39004	10.5604	17.3824	31.0652	36.5209	47.3145	20.1627	30.3923	24.8627	29.5575	21.169	17.4921	6.09615	1.59667	0.794716	0.19807	0.0045519	28.093	28.3168	2.8479	0	1.01964	0.0706724	0.924498	14.4277	5.73054e-11	7.86031e-10	yes
ENSG00000138439	FAM117B	0.460977	0.0355627	0.887736	0.76329	0.973146	2.52919	9.92511	14.9829	14.5184	10.8014	10.6752	13.5692	7.23568	9.51037	8.08532	3.69049	0.991872	0.77314	0.0647754	0.00396143	30	11.6474	0	0	1.02452	0.0710396	0.92444	14.4218	5.76791e-11	7.9012e-10	yes
ENSG00000157353	FUK	0	0.320064	1.50529	0.62451	1.62191	2.62116	5.05213	7.37442	6.35181	12.0616	15.7642	11.1797	9.22194	10.7173	8.06292	4.01854	3.26592	2.64306	0.0415226	0.00641083	29.1794	11.1907	0.386427	2.46699	1.00347	0.0695886	0.924423	14.42	5.7788e-11	7.90577e-10	yes
ENSG00000071462	BUD23	25.7225	32.2198	30.3374	53.8814	74.2835	116.297	204.343	406.763	679.169	2625.53	2370.27	1915.42	2311.47	1900.82	1675.97	1523.08	1076.93	814.246	1.48005	0.00167463	28.5144	2301.27	0.290565	9.59101	0.96913	0.0672151	0.924407	14.4184	5.78944e-11	7.90996e-10	yes
ENSG00000213190	MLLT11	0.860491	0.640129	1.3509	0.90207	2.77527	6.71385	17.0554	31.2145	27.6109	30.8441	27.7649	33.9942	23.5751	27.6621	29.5416	18.5892	4.17312	2.58552	0.103547	0.00289155	30	32.4132	0.346844	0	1.01622	0.0705752	0.92422	14.3991	5.91271e-11	8.06784e-10	yes
ENSG00000007866	TEAD3	0.860491	0.92463	0.308778	0.55512	2.59506	3.127	11.5375	17.6362	21.7776	32.4043	22.3445	24.2937	18.0183	20.807	23.9648	12.3563	2.34662	0.819888	0.0782368	0.00344348	30	27.1098	0	0	1.03042	0.0715676	0.924208	14.3979	5.92089e-11	8.06847e-10	yes
ENSG00000170638	TRABD	0.491709	1.20913	1.3895	3.78176	4.64948	15.3591	43.4627	87.5956	96.0982	205.527	165.122	113.589	147.858	167.976	117.427	100.901	27.5063	11.8956	0.354107	0.00347353	30	167.125	0	9.81992	1.04699	0.0727398	0.924167	14.3936	5.94843e-11	8.09544e-10	yes
ENSG00000064601	CTSA	4.97856	4.90765	3.01058	8.11863	12.0742	24.5561	37.6222	82.4062	129.11	425.217	429.989	415.099	446.342	345.125	310.422	314.977	226.981	204.889	0.258803	0.00122407	29.9917	408.887	0.00500078	9.96951	0.973286	0.067634	0.924136	14.3905	5.96897e-11	8.11283e-10	yes
ENSG00000121274	PAPD5	3.56489	10.0998	10.8844	15.8903	20.7605	50.6758	104.267	75.7341	71.4255	653.307	414.32	435.012	328.585	330.208	207.351	67.7411	9.20506	3.00626	0.811912	0.0105809	25.2924	574.552	6.70331	9.25963	1.01111	0.0702733	0.924115	14.3883	5.98351e-11	8.12203e-10	yes
ENSG00000123933	MXD4	0.706832	0.746817	1.50529	2.32457	3.8205	8.64524	17.0196	30.8633	43.296	48.0064	28.0016	40.281	36.4148	32.0794	34.0882	20.8855	7.95917	5.09194	0.12528	0.00265086	30	40.4944	1.46178e-07	0	1.02385	0.0712057	0.924022	14.3787	6.04638e-11	8.19639e-10	yes
ENSG00000184220	CMSS1	7.19125	6.40129	7.64225	11.1024	13.1195	25.108	46.5083	93.4873	117.141	124.757	168.743	144.084	157.246	153.59	135.143	108.09	89.9942	53.246	0.254444	0.00141781	30	145.023	5.39163	10	1.00696	0.0700367	0.92401	14.3776	6.05398e-11	8.19639e-10	yes
ENSG00000167978	SRRM2	15.4888	12.1624	19.6074	21.3721	28.906	98.1786	243.756	363.687	380.417	82.511	89.804	80.7326	75.076	84.3623	83.2496	63.7499	30.1795	24.086	1.44272	0.00328643	30	84.2042	5.83859	9.99978	0.889151	0.0618803	0.923925	14.3689	6.11205e-11	8.246e-10	yes
ENSG00000166272	WBP1L	0.860491	0.284502	1.3895	1.3878	2.52297	8.00144	20.7818	17.0119	19.79	65.5287	61.7314	64.1195	61.5742	66.814	49.4974	15.6368	1.11283	0.3596	0.0996217	0.00466261	29.9993	72.7419	0.875578	0	1.02613	0.071414	0.923924	14.3687	6.113e-11	8.246e-10	yes
ENSG00000104231	ZFAND1	0.952687	0.569003	1.65968	2.7756	1.87421	3.35693	12.5049	19.1579	23.5924	39.1852	35.4103	42.0447	35.9183	42.3622	41.8152	17.2496	10.584	3.2364	0.0712469	0.00266716	30	42.922	0.560532	0	1.02417	0.0712787	0.923922	14.3686	6.11428e-11	8.246e-10	yes
ENSG00000130558	OLFM1	15.6118	40.9327	62.7977	89.6172	120.922	188.862	496.685	943.73	928.358	731.618	949.238	995.673	903.963	854.63	881.098	621.015	303.694	96.7612	2.81623	0.0022206	17.3315	957.32	6.26693	8.8931	1.01635	0.0707572	0.923877	14.364	6.14507e-11	8.27683e-10	yes
ENSG00000187801	ZFP69B	0.0921955	0.213376	0.0385972	1.04085	1.58587	1.65547	5.58959	5.65762	5.8333	18.4225	14.1073	18.7466	11.6338	13.8311	12.2288	6.34218	2.74579	0.366792	0.0269856	0.00404052	14.0123	17.4929	0.118047	0	1.00378	0.069952	0.923735	14.3495	6.24356e-11	8.39867e-10	yes
ENSG00000132819	RBM38	1.41366	1.84926	3.16497	4.51035	6.34347	18.4861	39.2705	54.9375	37.4195	54.3672	58.5122	64.1195	62.52	48.8553	41.1209	25.0954	2.32243	0.64728	0.225171	0.00447714	25.6328	65.6389	1.6606	0	1.00764	0.0702813	0.923614	14.3372	6.32866e-11	8.50221e-10	yes
ENSG00000110107	PRPF19	18.4391	28.6635	25.2812	45.7627	73.8149	109.399	153.821	362.751	527.33	190.525	227.516	209.228	244.358	191.173	198.146	166.728	102.465	59.1686	1.04709	0.00127128	18.6437	210.778	10	7.02339	1.08297	0.0755605	0.923569	14.3325	6.36119e-11	8.53493e-10	yes
ENSG00000171017	LRRC8E	0.122927	0.284502	1.15792	2.7756	4.82969	8.82918	29.3812	34.492	38.3701	79.4506	45.0203	51.8873	49.231	28.869	27.4587	5.13936	2.4192	1.06442	0.305577	0.00905101	30	66.9797	0	0	1.02647	0.0716807	0.923446	14.3201	6.44881e-11	8.6414e-10	yes
ENSG00000119487	MAPKAP1	4.08733	4.01859	10.3826	13.5311	24.1845	29.7065	37.7656	96.4527	98.95	89.712	93.0941	102.466	111.846	96.2865	81.2115	59.6767	50.7911	27.7827	0.2536	0.00197039	28.3997	93.0922	7.83051	9.4177	1.00833	0.0704918	0.923289	14.3042	6.56291e-11	8.78305e-10	yes
ENSG00000122779	TRIM24	0.522441	2.27601	6.44573	8.95131	10.6686	15.3131	37.9806	52.5964	53.7528	53.2271	31.5048	39.0293	39.0395	28.9897	37.4254	13.1218	4.2215	1.44559	0.23629	0.00413919	16.4757	44.6832	1.39921	0	1.01376	0.0708917	0.923248	14.3001	6.5924e-11	8.81122e-10	yes
ENSG00000167981	ZNF597	0.0307318	0.106688	0.231583	0.589815	0.937104	2.25328	3.43975	2.73127	3.97528	3.60048	1.68057	1.64993	1.20595	1.03793	0.537528	0	0.145152	0.186992	0.0542288	0.0165058	30	2.91727	0	0.0156635	1.00007	0.0699829	0.92315	14.2902	6.66483e-11	8.89666e-10	yes
ENSG00000125388	GRK4	0	0	0.0385972	0.06939	0.396467	0.827735	2.47232	1.98992	1.55555	22.383	20.7586	16.6415	12.4851	12.8897	9.6755	4.70196	0.641088	0.097092	0.0171549	0.0084123	30	21.1784	0	0.636739	1.00897	0.070622	0.923118	14.287	6.68864e-11	8.91705e-10	yes
ENSG00000158552	ZFAND2B	1.32147	1.35138	0.385972	3.5042	2.8834	12.8759	16.2671	31.9948	37.2899	82.751	77.2826	49.9814	58.0509	60.9967	55.343	43.2198	24.9661	17.419	0.12663	0.00300383	29.9998	62.0506	0.00618087	10	0.978285	0.0684988	0.923066	14.2818	6.72698e-11	8.95674e-10	yes
ENSG00000080845	DLGAP4	3.65709	5.69003	6.13696	11.7269	18.67	40.3751	100.613	112.099	84.0859	225.03	220.178	213.95	225.181	170.463	176.152	100.026	17.2126	2.7905	0.446161	0.00399639	26.2971	240.488	6.934	0	1.01539	0.0711114	0.923038	14.2789	6.74831e-11	8.97371e-10	yes
ENSG00000142684	ZNF593	3.01172	2.98727	6.36854	12.8372	19.1746	46.5371	116.127	170.392	252.603	1231.36	868.594	648.023	811.412	805.606	581.784	337.421	82.1681	31.5729	1.07545	0.00508557	29.9539	1021.97	0.103775	0.374146	1.01408	0.0710293	0.923018	14.2769	6.76337e-11	8.98231e-10	yes
ENSG00000131779	PEX11B	0.921955	0	0.115792	1.56128	3.13569	4.96641	11.8241	23.0597	19.4443	45.006	65.8263	51.8873	55.8282	55.976	31.8933	14.844	1.30637	0.819888	0.103206	0.00475424	30	61.2265	0	0	1.0288	0.0720716	0.922996	14.2747	6.77968e-11	8.99254e-10	yes
ENSG00000166979	EVA1C	0.553173	2.13376	3.47375	6.45327	12.759	22.2109	43.8568	51.699	56.2589	172.823	203.089	177.964	246.864	177.559	162.737	62.7111	6.51974	2.13602	0.242872	0.00429088	26.4234	209.335	4.42992	9.45525	1.064	0.0745435	0.922984	14.2736	6.78831e-11	8.99257e-10	yes
ENSG00000174206	C12orf66	0.153659	0.0711254	0.424569	0.104085	1.65795	3.08101	5.37461	3.97984	5.79009	11.0415	6.69861	9.52975	5.95879	7.0483	3.67311	0.792773	0.048384	0.190588	0.0462484	0.00892828	30	10.2706	0.140931	0.0117939	1	0.0701008	0.922901	14.2652	6.85157e-11	9.06489e-10	yes
ENSG00000148153	INIP	0.276586	0.320064	0.69475	1.49189	1.73004	7.26568	19.5636	21.655	23.9813	379.611	186.662	246.266	210.426	209.687	176.242	49.808	4.536	1.1651	0.156797	0.00675809	29.8999	305.327	0	0	1.02043	0.071561	0.922845	14.2596	6.89375e-11	9.10917e-10	yes
ENSG00000117877	CD3EAP	2.98099	3.66296	4.59307	5.93285	10.6686	17.9343	24.7232	33.5165	45.154	174.503	96.3842	111.313	97.8471	86.0278	77.516	23.2638	4.06426	1.58943	0.257946	0.00749725	30	141.756	2.99749	1.52065	1	0.0701698	0.922761	14.2511	6.95862e-11	9.18327e-10	yes
ENSG00000169519	METTL15	0.430246	1.31582	2.20004	3.60828	9.65938	9.47297	17.9154	24.8155	20.006	190.405	109.923	135.408	120.666	127.738	106.699	49.0426	7.36646	2.21873	0.114534	0.00480234	2.47477	159.688	0.430104	0	1.01099	0.0709597	0.922724	14.2474	6.98717e-11	9.20932e-10	yes
ENSG00000154429	CCSAP	1.53659	0.960193	1.23511	2.67152	2.34276	8.55327	36.2607	44.3636	48.3948	122.896	71.9568	110.886	79.0486	69.3726	47.8176	13.2311	1.75392	1.42042	0.320242	0.00723568	30	111.38	0	0	1.0375	0.0729216	0.922524	14.2276	7.14257e-11	9.40228e-10	yes
ENSG00000101363	MANBAL	1.10635	0	2.93339	1.21433	0.576679	8.46129	22.4659	48.3434	47.7034	392.332	314.148	259.863	298.649	351.956	275.864	222.058	118.988	96.3045	0.139253	0.00204228	29.3608	334.352	0.132988	9.6043	1.00478	0.0706471	0.922473	14.2225	7.18287e-11	9.44344e-10	yes
ENSG00000106211	HSPB1	20.3445	17.2479	17.6389	24.46	30.7082	86.8202	93.4823	307.306	354.578	976.93	957.238	897.105	1100.65	975.875	907.168	840.285	677.824	525.559	0.712521	0.000855509	29.8618	997.073	0.727291	9.86876	0.973038	0.0684416	0.922419	14.2171	7.22615e-11	9.4884e-10	yes
ENSG00000135966	TGFBRAP1	0.491709	0.569003	1.4281	1.76945	4.86573	11.0365	22.9675	33.9847	34.3084	33.8445	23.812	33.1408	21.8016	22.8345	27.7723	15.8828	4.08845	1.03565	0.136015	0.00339672	26.8274	31.2464	0.575368	0	1.00738	0.0709031	0.922325	14.2078	7.30051e-11	9.56838e-10	yes
ENSG00000091164	TXNL1	1.69025	1.60032	4.1685	3.95523	7.78517	7.08174	28.1988	55.9909	71.4687	121.936	138.185	128.438	118.017	146.469	121.974	114.925	69.298	26.3119	0.163045	0.00152028	29.9536	139.026	0.982886	0	1.02631	0.0722384	0.922319	14.2072	7.30537e-11	9.56838e-10	yes
ENSG00000144120	TMEM177	1.47513	0.533441	3.24217	3.85115	12.4346	15.3131	30.4203	45.5341	54.833	55.4474	70.2289	50.0952	66.7527	58.3657	28.153	3.19843	1.41523	1.18668	0.294661	0.00592131	30	68.4753	0.0159169	0	1.01594	0.0715722	0.922192	14.1946	7.40797e-11	9.69062e-10	yes
ENSG00000159069	FBXW5	2.7044	2.27601	4.40008	7.14717	16.4354	25.016	40.6679	68.2816	119.172	66.0088	56.2873	56.4957	67.864	66.2829	54.8727	51.5029	31.6189	20.6267	0.239293	0.00146405	24.6114	54.0746	2.47568	9.99827	1.08142	0.0762514	0.922067	14.1823	7.51013e-11	9.81198e-10	yes
ENSG00000094880	CDC23	0.460977	0.746817	1.54389	2.63682	2.81131	6.02407	16.6613	25.4008	20.0493	32.1643	35.9547	35.5019	31.2127	33.6001	34.5586	15.2814	4.79002	1.255	0.0867027	0.00331151	29.5739	38.0113	0.973159	0	1.01956	0.0719175	0.922012	14.1768	7.55565e-11	9.85914e-10	yes
ENSG00000072071	ADGRL1	1.56732	2.48939	4.36148	3.19194	5.37032	22.3948	18.2378	30.5512	38.7158	39.9653	32.6646	30.4952	30.4324	38.8863	26.7196	21.7056	9.39859	5.05598	0.112352	0.00262302	2.87547	37.2373	1.56731	2.69311e-05	1.00326	0.0708135	0.921919	14.1676	7.63358e-11	9.9484e-10	yes
ENSG00000187713	TMEM203	0.276586	0.853505	1.89126	3.74706	5.22616	11.0365	33.5375	43.3881	37.4627	49.2666	55.9559	54.8458	62.4018	59.3312	43.4278	13.8872	1.8023	1.6146	0.197656	0.00437547	29.8407	63.049	0.441119	0	1.01668	0.0717759	0.921889	14.1647	7.6585e-11	9.96845e-10	yes
ENSG00000005156	LIG3	0.491709	0.640129	0.501764	1.59597	1.33357	2.89707	4.62216	5.69664	6.17897	6.7209	7.21935	7.65224	6.95192	7.62761	7.01026	5.85012	3.54413	2.40213	0.0176766	0.00250171	29.97	5.80805	0.921179	1.97837	1	0.070612	0.921861	14.162	7.68159e-11	9.98606e-10	yes
ENSG00000178896	EXOSC4	0.153659	0.355627	1.08072	1.56128	4.10884	11.4963	18.0228	28.9514	31.1109	47.4063	60.1691	47.3927	66.9891	62.4933	38.0973	17.0856	5.29805	1.76564	0.133072	0.0039569	26.0803	61.9863	3.6021e-07	0	1.01918	0.0719824	0.921828	14.1587	7.70947e-11	1.00099e-09	yes
ENSG00000138757	G3BP2	1.38293	1.31582	2.20004	4.78791	10.3442	15.9569	52.7786	98.2475	97.1784	115.635	118.894	148.579	121.895	124.673	116.016	95.4061	24.6637	6.05926	0.338616	0.00280146	29.9945	128.246	0.0820222	9.99123	1.04766	0.0740249	0.921769	14.1529	7.75967e-11	1.00625e-09	yes
ENSG00000152291	TGOLN2	6.02344	4.55203	11.1546	15.474	28.005	68.702	160.593	300.907	379.38	2057.07	1230.96	1282.99	1223.49	1337.95	1120.59	808.109	264.866	121.919	1.31165	0.00348402	26.9406	1602.27	1.52513	4.67351	1.0207	0.0721508	0.921706	14.1467	7.81277e-11	1.01151e-09	yes
ENSG00000122359	ANXA11	0.921955	0.853505	0.617555	3.19194	3.89258	3.90875	18.3095	29.1855	36.4257	87.5517	64.9031	64.6316	70.1813	62.6622	68.1317	55.6855	41.2353	24.9922	0.0815422	0.00135419	30	74.2598	0.871956	0	1.00308	0.0709096	0.921698	14.146	7.81956e-11	1.01151e-09	yes
ENSG00000178035	IMPDH2	0.799028	0.853505	1.85267	2.01231	4.90177	8.00144	22.215	55.7178	73.6292	84.1312	95.2954	82.3825	87.0646	81.6347	75.3435	82.8858	62.8024	40.8362	0.140677	0.000850569	30	88.8625	0	0	1.01836	0.0720323	0.921612	14.1375	7.89341e-11	1.01919e-09	yes
ENSG00000167807	AC011511.1	0.307318	0.462315	0.463167	1.11024	1.11732	2.71313	9.31598	21.6941	32.364	31.9843	27.6466	21.9042	29.9831	19.8173	21.0756	16.8396	8.51558	3.51329	0.0805119	0.00222315	30	27.9583	0	0	1.07101	0.0757593	0.921606	14.1369	7.89839e-11	1.01919e-09	yes
ENSG00000137312	FLOT1	0.614637	0.78238	0.308778	0.797985	1.62191	2.43722	3.94138	9.75452	15.3826	21.4829	20.6166	16.7553	20.0755	19.2621	21.2995	15.9921	11.334	6.67777	0.0301044	0.00127905	30	20.9638	0.233971	0	1.02405	0.0724587	0.921564	14.1328	7.93481e-11	1.02262e-09	yes
ENSG00000189007	ADAT2	2.76586	4.08971	4.28429	5.5512	10.4163	22.6708	50.1988	36.599	28.7344	80.4107	63.5066	49.3271	50.9571	35.7725	17.3353	3.33511	1.88698	0.399156	0.455597	0.0128411	30	78.142	2.16778	0.741579	1	0.0707636	0.921551	14.1316	7.94594e-11	1.0228e-09	yes
ENSG00000270647	TAF15	5.28588	3.12952	3.70533	4.68383	6.77598	13.0598	27.6255	39.4863	42.4318	108.134	144.221	90.2054	110.167	71.7864	71.6256	52.241	26.4177	15.3909	0.182789	0.00443203	29.658	108.724	2.73651	10	0.991239	0.0701622	0.921513	14.1278	7.97913e-11	1.02526e-09	yes
ENSG00000116095	PLEKHA3	0.215123	0.213376	0.501764	0.936765	0.973146	3.72481	11.2508	11.9395	10.1543	48.6065	30.3213	43.4101	32.7261	27.469	27.8843	10.7708	1.18541	0.406348	0.0681998	0.0055191	30	43.6279	1.18808e-05	0	1.00405	0.0710723	0.921506	14.1272	7.9847e-11	1.02526e-09	yes
ENSG00000121766	ZCCHC17	1.53659	0.569003	2.50882	1.3878	3.06361	9.51896	23.0033	48.2263	36.2529	250.893	241.032	222.456	246.249	242.925	175.458	188.707	74.342	33.8563	0.123628	0.00235113	27.0181	250.356	2.22904	6.56343	1.04254	0.073806	0.921488	14.1254	8.0006e-11	1.02604e-09	yes
ENSG00000145982	FARS2	0.276586	0.426753	0.887736	2.35926	2.84735	4.55254	9.101	11.1202	13.9999	17.1623	15.7169	16.101	19.8863	13.2276	16.3498	11.7276	5.66093	3.24719	0.036401	0.00212422	29.9448	17.9331	1.23223	0	1.00472	0.0711884	0.921366	14.1136	8.10689e-11	1.0384e-09	yes
ENSG00000069849	ATP1B3	21.0206	28.7347	28.0988	38.1992	53.6672	81.8538	109.57	248.74	332.541	736.358	824.047	900.831	770.789	771.837	796.281	699.718	499.976	307.21	0.700922	0.00115979	29.7719	834.386	0.124338	9.82873	0.9402	0.0666343	0.921328	14.1098	8.14058e-11	1.04144e-09	yes
ENSG00000105204	DYRK1B	0.0307318	0	0.347375	0.20817	0.973146	2.48321	3.00978	4.21395	6.35181	52.0269	37.1382	33.9657	23.9061	29.6173	22.9121	8.11909	1.08864	0.345216	0.0405251	0.00830686	30	44.4396	0	1.09373	1.00672	0.0713805	0.921263	14.1035	8.19822e-11	1.04753e-09	yes
ENSG00000104835	SARS2	1.47513	0.569003	1.3895	2.91438	2.16255	9.01312	14.5831	19.8992	29.0369	63.7285	57.7785	50.5219	69.0463	57.9553	49.363	45.4614	35.7921	21.8277	0.0597408	0.00135026	28.4113	60.5205	1.52345	1.24014	1.00486	0.0712584	0.921244	14.1017	8.21484e-11	1.04763e-09	yes
ENSG00000185591	SP1	0.368782	0.675692	1.77547	3.74706	4.39718	12.0481	26.0848	30.6682	40.2281	69.9093	42.606	64.6316	43.7451	39.5863	46.8769	25.6694	2.34662	0.596936	0.165732	0.00412996	29.328	60.6963	0.365506	0	1.01142	0.0717256	0.92124	14.1012	8.21909e-11	1.04763e-09	yes
ENSG00000175793	SFN	8.94296	9.49524	10.923	14.1209	22.4544	54.4006	186.105	270.629	464.763	445.379	393.963	248.058	338.469	305.225	251.406	165.444	35.9977	13.5965	1.41442	0.00334513	30	380.219	0	0	1.07084	0.0760257	0.921074	14.0852	8.36765e-11	1.06527e-09	yes
ENSG00000204435	CSNK2B	2.95026	1.13801	3.24217	3.19194	3.31591	10.4846	13.4723	40.5788	53.5799	348.526	337.155	334.878	342.016	379.063	304.868	251.282	201.713	207.13	0.103884	0.000982629	29.4545	341.935	0.606665	9.80966	0.982775	0.0698306	0.920956	14.0737	8.47566e-11	1.07771e-09	yes
ENSG00000129197	RPAIN	12.2927	12.9448	17.8319	39.8646	54.9287	102.317	268.695	530.022	461.219	91.8722	122.35	108.98	104.373	109.345	94.1794	76.0515	29.5142	7.4617	1.83561	0.00322144	30	109.228	5.89007	9.96476	1.00401	0.0713508	0.920933	14.0715	8.49683e-11	1.07909e-09	yes
ENSG00000135930	EIF4E2	3.01172	4.4809	3.74393	6.17571	9.04665	19.4058	42.2444	86.1129	115.024	121.276	175.371	131.34	160.958	138.456	137.809	99.8347	41.8401	20.0693	0.305698	0.00223819	30	152.357	0.622658	3.58291	1.03842	0.0738077	0.92091	14.0693	8.51771e-11	1.08043e-09	yes
ENSG00000158435	CNOT11	1.78245	4.26753	5.82818	7.42473	9.37104	20.3255	63.4204	76.6705	86.2464	73.9299	77.8506	64.7454	86.1424	65.1726	66.4967	60.0321	23.4058	6.44044	0.262318	0.00237282	21.7332	81.0337	3.02499	0	1.00596	0.0715854	0.920737	14.0527	8.67749e-11	1.09936e-09	yes
ENSG00000117399	CDC20	2.82733	3.05839	5.558	8.25741	13.3357	26.1196	85.2771	165.203	251.912	400.853	430.179	392.569	455.8	472.815	435.577	337.065	149.313	49.5673	0.606466	0.00201392	29.7292	456.254	0.0456047	9.87382	1.05577	0.0751616	0.920675	14.0466	8.73633e-11	1.1044e-09	yes
ENSG00000117614	SYF2	0.952687	1.42251	1.19651	3.12255	3.13569	9.19706	18.632	27.0395	24.0245	38.3451	55.4115	33.1976	48.3561	36.0863	30.7287	12.9304	4.75373	2.27986	0.119702	0.00441453	29.6088	47.8353	0.990857	0	1.00463	0.0715268	0.920663	14.0455	8.74735e-11	1.1044e-09	yes
ENSG00000188786	MTF1	0.368782	0.960193	1.69828	2.15109	3.60424	7.31166	19.0261	15.022	11.7962	53.3471	36.7122	34.0795	24.6155	17.9104	8.13011	1.9956	0.399168	0.507036	0.230328	0.0164648	30	50.9735	0.12178	0.494955	1	0.071198	0.920661	14.0453	8.74894e-11	1.1044e-09	yes
ENSG00000166479	TMX3	0.460977	0.817942	0.771944	1.52658	2.30672	3.81678	5.84041	7.37442	6.82712	37.385	23.954	33.9088	27.8313	22.4001	24.6367	16.3749	3.85862	0.837868	0.0265458	0.00360144	29.9679	33.0829	1.10805	0	1.01422	0.0722428	0.920596	14.039	8.81076e-11	1.11086e-09	yes
ENSG00000123136	DDX39A	2.42781	1.84926	5.01764	13.0106	15.5703	25.7978	37.5864	91.9266	108.456	109.575	114.776	103.547	100.283	105.966	76.7321	84.69	74.4146	47.4384	0.22677	0.00120255	28.9952	97.999	4.88734	9.99996	0.998868	0.0711555	0.920583	14.0378	8.82273e-11	1.11103e-09	yes
ENSG00000239789	MRPS17	1.16781	1.03132	2.7018	5.06547	6.41556	12.9679	33.5734	80.2212	81.7094	46.9863	69.9685	62.9248	66.0906	60.9002	49.6765	26.0248	14.5999	4.99125	0.268394	0.00272324	30	65.2033	0	0	1.04531	0.0744832	0.920545	14.0342	8.85877e-11	1.11422e-09	yes
ENSG00000165512	ZNF22	0.215123	0.497878	0.926333	2.28987	1.76608	4.73649	11	10.886	8.9876	34.9847	35.1499	40.4232	38.4011	21.8932	15.4091	3.63582	0.387072	0.327236	0.0764647	0.0073141	25.2144	41.2111	0.356848	0	1.0133	0.0722573	0.920434	14.0235	8.96553e-11	1.12554e-09	yes
ENSG00000172717	FAM71D	0.0614637	0.177814	0.0771944	0.728595	1.58587	2.98904	3.29643	10.4959	16.6357	22.623	22.1315	23.867	19.9572	18.3449	22.5314	15.0627	5.76979	2.23671	0.0406401	0.00227278	30	23.5976	0	0	1.05394	0.075158	0.920429	14.023	8.97026e-11	1.12554e-09	yes
ENSG00000211460	TSN	3.07318	5.29884	4.51587	7.39004	13.2636	27.1313	63.1695	120.761	132.092	447.78	346.268	514.236	406.12	438.081	423.147	312.38	179.795	55.9394	0.373462	0.00204652	28.7878	455.731	0.55894	9.9984	1.01242	0.0722987	0.920223	14.0034	9.17036e-11	1.14926e-09	yes
ENSG00000164040	PGRMC2	26.3986	30.8329	40.4885	73.2759	128.455	383.425	1216.17	1871.78	2500.89	432.118	601.218	449.889	545.348	506.777	472.868	362.598	89.9338	37.5279	6.51755	0.00198173	29.9822	522.579	0.00804223	9.98801	1.1007	0.0786115	0.920206	14.0017	9.1873e-11	1.1499e-09	yes
ENSG00000162437	RAVER2	0.0614637	0.640129	0.617555	0.6939	2.34276	2.48321	4.51467	5.93075	6.22218	11.1615	8.56854	9.38751	10.1441	10.0897	7.39101	7.70903	2.24986	1.7117	0.018102	0.00244274	29.9998	10.6396	0.811247	0	1.00338	0.0716666	0.920195	14.0007	9.19745e-11	1.1499e-09	yes
ENSG00000063176	SPHK2	0.245855	0.569003	0.463167	2.98377	2.59506	8.27735	21.1401	29.6928	39.2775	64.9887	67.9566	42.5283	55.4735	68.045	57.7619	22.1703	5.39482	3.2328	0.141768	0.00354294	30	67.2174	0	0	1.03021	0.0736191	0.920123	13.9938	9.26923e-11	1.15749e-09	yes
ENSG00000064666	CNN2	2.61221	4.72984	6.21415	11.1024	18.0573	37.8919	52.3845	157.789	172.752	363.348	305.722	395.015	358.19	264.384	283.591	260.494	160.877	69.241	0.450551	0.00189414	28.3492	349.166	1.66264	9.86705	1.01475	0.0725291	0.920093	13.991	9.29878e-11	1.1598e-09	yes
ENSG00000168883	USP39	2.0283	7.25479	6.71591	10.2003	13.2276	22.3489	50.6646	75.8511	98.0426	209.488	250.76	226.239	237.548	232.183	217.363	208.144	170.505	120.031	0.20067	0.000856052	29.9957	228.728	0.0214158	9.9999	0.937293	0.0669984	0.920081	13.9898	9.31112e-11	1.15995e-09	yes
ENSG00000041357	PSMA4	78.7964	69.1695	78.8927	90.4846	96.9542	109.675	221.685	420.81	579.527	1440.91	1326.94	1374.64	1307.67	1562.43	1148.65	1172.05	737.699	592.078	1.22068	0.00145123	0.300821	1530.69	9.77274	9.76885	0.880078	0.0629135	0.920069	13.9887	9.32242e-11	1.15998e-09	yes
ENSG00000244687	UBE2V1	21.4508	17.6035	17.0986	36.3951	42.2417	93.0283	210.935	379.1	515.793	415.855	486.276	504.82	468.191	500.308	532.22	348.355	233.429	113.163	1.17857	0.00160515	29.6056	501.169	10	9.97767	1.02473	0.0732641	0.920049	13.9868	9.34208e-11	1.16033e-09	yes
ENSG00000134077	THUMPD3	0.153659	0.462315	2.04565	2.67152	5.11803	9.47297	21.2476	30.122	23.2036	29.764	31.0787	37.6354	26.318	31.2587	25.9581	12.0556	3.73766	0.632896	0.114931	0.00433134	15	32.5015	2.23746	2.59228	1.09101	0.0780058	0.920044	13.9863	9.34751e-11	1.16033e-09	yes
ENSG00000018189	RUFY3	0.33805	0.320064	0.656153	0.797985	0.973146	1.97737	5.98373	7.14031	8.16662	9.66129	5.87016	6.51436	8.51256	5.93795	4.4794	3.60848	1.5241	0.729988	0.0356571	0.00429427	30	7.69892	0.251212	0.464623	0.999997	0.0715376	0.919963	13.9786	9.42857e-11	1.16901e-09	yes
ENSG00000164045	CDC25A	2.15123	4.62315	8.337	19.9149	31.7174	72.7487	166.613	131.023	120.468	128.417	160.577	125.224	114.21	118.131	46.7649	9.02121	3.36269	1.63258	1.255	0.00914698	26.4747	145.339	4.31508	9.99948	1.05935	0.0758037	0.919923	13.9749	9.4685e-11	1.17257e-09	yes
ENSG00000213920	MDP1	0	0.0711254	0.617555	0.90207	1.94629	1.74744	4.58633	9.32532	13.4382	24.4833	24.4984	23.8386	28.659	20.9518	21.3891	22.0063	13.6201	9.50782	0.0274776	0.00121922	25.1055	25.5551	0.0286419	0	1.00414	0.0719156	0.919796	13.9628	9.59783e-11	1.18718e-09	yes
ENSG00000144554	FANCD2	0.553173	1.49363	3.04918	2.74091	4.21697	8.92115	10.8209	13.5393	12.574	28.8638	21.5397	25.2325	17.3562	25.6104	18.8135	8.52914	7.29389	6.42605	0.0794559	0.00597966	0.320458	21.1767	0.55306	5.95502	0.999995	0.0716637	0.919703	13.954	9.69348e-11	1.19759e-09	yes
ENSG00000152219	ARL14EP	0.399514	0.248939	1.00353	1.70006	2.19859	4.92043	13.6157	23.6059	19.4011	110.595	69.4478	96.1509	62.3545	61.0933	58.7473	11.3449	0.84672	0.794716	0.129924	0.00672873	30	98.6055	9.52326e-10	0.322894	1.05192	0.0753935	0.919687	13.9524	9.71038e-11	1.19826e-09	yes
ENSG00000221914	PPP2R2A	2.98099	6.22347	9.57211	15.7168	24.3287	55.2283	145.007	217.565	239.079	440.579	341.724	526.383	411.511	321.035	408.409	198.221	22.3776	5.96576	0.950148	0.00361725	29.9855	456.227	0.39917	8.616	1.03025	0.0738499	0.919668	13.9507	9.72996e-11	1.19926e-09	yes
ENSG00000113048	MRPS27	3.84148	6.0101	8.56858	15.5087	16.3272	22.7167	71.0523	104.959	117.833	375.89	478.276	374.732	419.102	441.05	394.77	341.166	179.456	94.5712	0.32178	0.00176782	29.9845	436.917	0.00397893	9.99273	0.964351	0.0691365	0.919645	13.9485	9.75348e-11	1.20075e-09	yes
ENSG00000118689	FOXO3	0.276586	3.55627	7.29487	7.14717	11.1011	23.6824	46.7591	46.6266	40.2714	317.142	187.585	192.017	160.982	235.273	105.579	24.7126	2.02003	2.31582	0.338643	0.00815631	27.7049	273.205	4.54857	0	1.03007	0.0738626	0.919616	13.9458	9.7833e-11	1.20276e-09	yes
ENSG00000184897	H1FX	0.768296	0.92463	1.77547	3.95523	5.44241	14.5314	19.0261	36.0137	34.5677	18.0624	24.3801	19.2586	25.2303	21.6518	18.9703	13.3131	6.50765	1.84475	0.119812	0.00279914	13.6134	23.2318	0.768317	0.511085	1	0.0717106	0.919607	13.9449	9.79286e-11	1.20276e-09	yes
ENSG00000174891	RSRC1	2.39708	0.426753	0.578958	0.936765	1.58587	4.55254	8.13357	21.1868	20.7838	38.5851	30.4633	33.5106	21.707	34.3967	21.9491	12.8484	6.20525	3.20404	0.0821565	0.00367175	30	35.0746	1.91643e-07	0	1.00263	0.0719048	0.919595	13.9438	9.8051e-11	1.20285e-09	yes
ENSG00000204590	GNL1	0.553173	0.462315	0.578958	1.11024	1.47774	2.98904	6.59285	15.2951	17.8456	20.2827	12.3557	14.5933	14.7788	14.869	13.3486	9.64996	5.95123	3.93762	0.047304	0.00200858	30	16.3487	0.128399	0	1.00989	0.072472	0.9195	13.9349	9.90453e-11	1.21362e-09	yes
ENSG00000125354	SEPT6	1.62879	2.73833	2.93339	6.31449	5.40637	9.51896	22.2509	35.7796	35.5615	98.3531	79.2708	106.904	91.8411	73.9347	78.6135	62.4104	46.6422	31.278	0.095436	0.00190744	20.1428	85.0029	2.59063	9.9899	0.994987	0.071452	0.919398	13.9253	1.00123e-10	1.2254e-09	yes
ENSG00000072415	MPP5	0.184391	1.20913	2.16144	2.84499	3.53216	7.17371	27.6613	31.6046	27.1356	131.658	79.5312	110.659	94.7259	80.3795	77.1801	41.6616	4.2336	2.22233	0.153102	0.00459883	29.3142	115.476	0.157285	0	1.00132	0.0719184	0.919374	13.923	1.00374e-10	1.22688e-09	yes
ENSG00000089220	PEBP1	14.6591	15.7543	17.5231	22.0313	35.3216	63.9196	157.978	373.13	582.336	324.883	355.476	356.868	303.449	308.87	322.427	313.419	242.791	206.831	0.978999	0.000579104	30	336.945	8.50173e-07	0	1.04835	0.0753013	0.919365	13.9221	1.00479e-10	1.22688e-09	yes
ENSG00000104825	NFKBIB	0.891223	0.746817	0.810541	3.33072	6.41556	11.8182	19.4202	33.7116	68.1848	121.576	89.8277	85.8246	97.2324	89.2382	80.8756	64.898	33.4333	25.9739	0.15241	0.00204606	30	102.961	0	0	1.01065	0.0726081	0.919334	13.9192	1.00807e-10	1.22945e-09	yes
ENSG00000078237	TIGAR	0.0614637	0.284502	1.00353	1.45719	2.01838	2.11532	9.5668	10.9251	8.33945	25.9235	29.0194	23.2696	19.3897	23.6552	18.5895	6.34218	1.28218	0.812696	0.0517719	0.00503342	30	28.2372	0.437726	0	1.00929	0.0725287	0.919297	13.9158	1.01199e-10	1.23232e-09	yes
ENSG00000182307	C8orf33	1.13708	0.889068	1.08072	1.73475	2.99152	7.26568	22.8958	43.5052	51.7219	102.854	115.959	113.447	122.675	109.007	113.53	107.626	51.5652	36.7224	0.119887	0.00137589	30	120.743	0.252151	0	1.01837	0.0731847	0.91929	13.9151	1.01279e-10	1.23232e-09	yes
ENSG00000102977	ACD	0.184391	0	0.231583	1.45719	1.73004	4.23065	8.45605	22.0842	32.1912	35.3447	36.3334	26.2566	32.8443	28.9656	21.5683	26.4896	10.4147	5.26814	0.0776732	0.00203285	30	33.6146	0	0	1.05454	0.075794	0.919271	13.9133	1.01483e-10	1.23312e-09	yes
ENSG00000076351	SLC46A1	0.245855	0.426753	0.887736	1.04085	1.40566	3.49488	7.45279	16.4656	14.9505	35.2847	43.0084	31.7469	46.7718	39.1036	32.8564	21.5689	7.8745	1.22264	0.0551278	0.00292619	30	42.6764	9.87053e-08	0	1.01962	0.0732881	0.919262	13.9125	1.0158e-10	1.23312e-09	yes
ENSG00000167272	POP5	0.430246	0.711254	1.31231	1.73475	1.80212	6.34597	15.4789	27.6248	39.0615	47.2863	57.9915	48.8151	57.0814	57.3519	48.5119	49.0973	26.8773	16.0382	0.0843504	0.00137072	29.8833	56.5395	0.300403	0	1.02328	0.0736065	0.91915	13.902	1.02784e-10	1.2438e-09	yes
ENSG00000013441	CLK1	0.33805	4.51646	21.0355	37.7135	57.74	81.6239	140.385	121.736	93.7216	94.7526	73.4243	90.4899	42.4919	45.7898	17.5816	18.0151	0.798336	1.98499	1.68489	0.0143662	16.8302	98.0078	0.46562	3.52185	0.969971	0.0697729	0.919148	13.9018	1.02806e-10	1.2438e-09	yes
ENSG00000115234	SNX17	1.22927	1.24469	1.54389	2.42865	2.99152	7.35765	12.7199	26.0641	30.0739	154.281	140.552	93.5622	118.916	128.197	116.98	75.1767	50.9725	42.0265	0.0838274	0.00227059	29.7951	126.458	0.913682	10	0.989965	0.0712116	0.919147	13.9017	1.02817e-10	1.2438e-09	yes
ENSG00000163156	SCNM1	1.65952	1.70701	2.43162	4.78791	7.28057	18.0722	49.4464	67.1111	88.8822	38.5251	53.1865	42.4145	52.4232	28.0966	30.1688	16.0742	4.17312	2.26548	0.319134	0.00348963	30	46.739	0	0	1.04429	0.0751354	0.919116	13.8988	1.03158e-10	1.24467e-09	yes
ENSG00000100083	GGA1	0.737564	0.746817	1.04212	1.97762	4.21697	12.554	19.1336	39.3302	40.7034	74.89	58.9383	39.8542	54.1966	62.2036	46.6306	37.9711	15.0958	4.95169	0.136667	0.00278619	30	63.6445	0.551707	0	1.01164	0.0727863	0.919115	13.8987	1.03165e-10	1.24467e-09	yes
ENSG00000242114	MTFP1	1.04488	2.84502	4.51587	6.2451	14.2368	23.9583	56.2542	99.6522	173.962	208.288	181.052	154.439	216.243	154.604	149.993	138.735	55.6537	20.1736	0.419942	0.00220766	30	196.393	0	0	1.04616	0.0752735	0.919108	13.898	1.03246e-10	1.24467e-09	yes
ENSG00000143493	INTS7	0.553173	1.06688	2.08425	2.8103	5.80283	7.67954	16.303	26.5713	43.5985	75.37	73.1166	75.925	93.4253	68.0692	71.1329	33.1871	11.7452	2.23671	0.13036	0.00320418	30	85.2624	0.380582	0	1.03285	0.0743458	0.919048	13.8925	1.03897e-10	1.25108e-09	yes
ENSG00000144567	RETREG2	1.01415	0.675692	1.4281	2.1164	2.84735	9.24304	30.277	65.5504	75.6168	361.608	332.919	217.932	271.101	330.86	232.75	202.841	45.1544	10.5327	0.259918	0.00329506	29.9808	325.646	0	9.99733	1.05326	0.0758296	0.91902	13.8899	1.04201e-10	1.25329e-09	yes
ENSG00000132522	GPS2	0.860491	0.853505	1.00353	1.24902	1.00919	5.74816	11.9316	22.2403	27.7406	65.8888	63.767	66.1677	76.4239	82.2623	53.1929	43.5205	30.6876	20.4145	0.0773027	0.00229653	29.9481	63.3298	0.281199	10	1.01508	0.0730918	0.918997	13.8878	1.04454e-10	1.25489e-09	yes
ENSG00000157954	WIPI2	1.22927	1.03132	2.16144	3.71237	3.49612	11.8642	25.9056	56.03	54.4873	211.948	209.385	262.281	235.136	233.342	236.49	163.421	53.9119	19.796	0.177985	0.00249091	29.9594	243.14	0.00295045	9.99207	1.03196	0.0743279	0.918956	13.8839	1.04913e-10	1.25895e-09	yes
ENSG00000101846	STS	0.276586	0.177814	0.192986	0.104085	0.396467	0.689779	2.36483	2.69225	5.44441	6.7809	6.67494	6.42902	4.98931	6.92761	5.30809	3.63582	1.76602	1.75125	0.0130413	0.00221537	29.8944	6.73183	0.00865931	0.00276042	1.00568	0.0725222	0.918776	13.8672	1.06912e-10	1.28147e-09	yes
ENSG00000173705	SUSD5	0.491709	1.13801	1.69828	2.04701	4.54135	6.48393	16.8046	28.7563	34.5245	41.7056	31.5048	40.7361	32.2531	28.9173	37.3806	25.9702	16.6199	8.83897	0.0856946	0.00175608	29.6752	38.1701	1.05084	0	1.00724	0.0726455	0.918755	13.8652	1.07155e-10	1.28292e-09	yes
ENSG00000100129	EIF3L	11.0942	10.5621	14.8213	24.0089	28.2933	48.4685	110.645	158.648	278.27	667.169	773.914	621.169	669.489	785.137	645.795	516.205	332.785	306.728	0.572832	0.00136917	29.5175	720.733	0.218636	9.53667	0.968876	0.0699462	0.91861	13.8517	1.08799e-10	1.3011e-09	yes
ENSG00000115524	SF3B1	1.50586	2.98727	4.28429	5.86346	8.21768	14.8533	38.948	72.6126	79.0736	142.999	101.663	115.666	95.6244	122.235	103.855	86.959	53.8272	41.674	0.206725	0.00182046	30	112.592	2.36544	9.99999	0.99725	0.0720243	0.918548	13.846	1.09504e-10	1.30805e-09	yes
ENSG00000204138	PHACTR4	1.56732	4.87209	7.60365	8.43089	12.2905	23.5445	50.8438	45.339	47.7898	902.1	493.922	449.776	440.596	472.139	334.634	119.435	15.5917	6.15995	0.442421	0.00900902	26.1337	715.052	0.25271	10	0.956757	0.0691086	0.918529	13.8443	1.09724e-10	1.30917e-09	yes
ENSG00000198301	SDAD1	7.19125	7.57486	9.37912	9.22887	8.72227	13.7496	23.6124	28.8734	37.0738	112.875	65.4712	101.613	73.3499	69.3485	68.4004	46.8556	14.866	8.23844	0.103604	0.00339923	29.5345	94.9661	7.30035	0	1.00296	0.0724644	0.91849	13.8407	1.10172e-10	1.31239e-09	yes
ENSG00000108395	TRIM37	0.184391	0.462315	1.58249	4.05932	3.8205	8.50728	14.2606	17.4021	16.5493	25.3234	20.5929	23.0705	18.6803	25.1759	20.9188	15.2814	3.6288	1.54988	0.0614339	0.0029564	2.29832	25.1117	0.850591	0	1.01431	0.0732878	0.918484	13.8401	1.10245e-10	1.31239e-09	yes
ENSG00000136271	DDX56	2.39708	2.45383	4.01411	6.52266	8.43393	22.1189	39.3421	86.5421	73.3267	256.474	228.818	269.194	207.872	238.628	237.184	191.414	77.7652	31.091	0.2478	0.00226695	29.9966	253.744	0.01706	9.99187	0.99635	0.0720034	0.918457	13.8376	1.10561e-10	1.31466e-09	yes
ENSG00000146701	MDH2	15.0279	17.888	17.8319	21.0252	26.0947	46.6291	66.0002	94.1506	137.363	188.485	227.137	172.389	200.234	182.507	170.329	156.887	127.226	102.202	0.244992	0.0010231	0	188.868	10	10	0.970148	0.0701162	0.918443	13.8363	1.10718e-10	1.31503e-09	yes
ENSG00000119138	KLF9	0.399514	1.06688	3.74393	4.33688	5.58658	5.61021	14.2606	12.7979	10.1543	41.4655	32.5936	39.0862	29.2501	27.0104	10.3922	2.18696	0.18144	0.176204	0.111396	0.00936756	4.31381	43.0037	0.399535	0	1.01105	0.073083	0.91842	13.8342	1.10979e-10	1.31664e-09	yes
ENSG00000198911	SREBF2	3.04245	5.33441	7.75804	10.0962	17.1922	29.6605	51.0588	71.0519	102.925	28.2638	29.1851	26.4557	26.318	27.8794	24.8607	27.0636	14.5515	11.8992	0.234152	0.00174487	4.60018	18.6484	3.04243	9.99994	1.07996	0.0780906	0.91837	13.8295	1.11569e-10	1.32213e-09	yes
ENSG00000143153	ATP1B1	1.01415	0.853505	2.04565	4.37157	6.55973	19.1299	67.1468	88.6881	63.4317	328.544	272.3	358.66	277.699	243.577	245.829	134.334	25.2081	7.69544	0.365607	0.00416566	29.9255	327.576	0.0333844	9.98008	1.02161	0.0738784	0.918356	13.8282	1.11734e-10	1.32258e-09	yes
ENSG00000130520	LSM4	10.0493	12.4825	16.4424	20.9558	22.3824	50.3539	96.098	220.998	323.554	288.879	311.047	277.956	265.734	278.915	218.662	194.257	159.837	163.097	0.613993	0.00104456	30	276.449	6.18317	6.95674	1.00487	0.0726775	0.918336	13.8264	1.11967e-10	1.32385e-09	yes
ENSG00000158793	NIT1	0.491709	0	0.463167	2.25518	1.33357	3.40291	11	21.1478	28.2591	24.7233	36.1914	27.7643	26.7673	25.0794	29.4521	17.1676	8.62445	3.38743	0.0760674	0.00226875	30	30.7511	0	0	1.04338	0.0754991	0.918263	13.8197	1.12821e-10	1.33243e-09	yes
ENSG00000183431	SF3A3	1.53659	1.8137	2.04565	3.08786	5.0099	6.39196	13.4723	23.5669	26.0554	271.776	188.508	238.044	192.928	198.849	204.955	176.187	88.1073	38.2075	0.076377	0.00211373	29.9452	228.01	0.00383936	9.70763	0.950819	0.0688508	0.918156	13.8098	1.14092e-10	1.34487e-09	yes
ENSG00000085760	MTIF2	1.19854	0.853505	2.20004	2.39396	5.40637	8.27735	10.8567	29.4977	31.6294	16.0221	19.5988	14.8493	14.4714	13.2518	13.2366	8.77518	7.94707	5.038	0.0781498	0.00172683	21.6382	16.3021	1.02605	6.69538e-06	1.00412	0.0727122	0.918152	13.8095	1.14131e-10	1.34487e-09	yes
ENSG00000137504	CREBZF	1.78245	2.31158	6.9475	13.878	23.0672	49.986	123.222	113.66	80.4563	60.5481	70.4183	64.9445	54.7641	44.076	32.9236	16.4295	5.41901	2.05332	0.995574	0.00946134	30	66.618	1.71779	7.40589	0.999999	0.072433	0.918112	13.8058	1.1461e-10	1.34737e-09	yes
ENSG00000141985	SH3GL1	4.11807	3.05839	4.47728	7.6329	14.7053	34.5809	76.2478	188.223	288.813	347.206	276.75	216.027	286.921	273.097	228.405	208.909	121.444	72.1717	0.639256	0.00170905	30	293.448	0	0	1.04486	0.0756834	0.918111	13.8057	1.14626e-10	1.34737e-09	yes
ENSG00000070423	RNF126	3.44197	2.77389	6.9475	17.2781	35.1774	73.0247	158.515	224.783	227.671	85.4514	83.6971	83.9755	99.6442	92.5934	87.9306	54.7833	12.3137	4.9409	1.05742	0.00414124	29.9888	92.0027	0.0144522	9.98659	0.986756	0.0714785	0.918102	13.8049	1.1473e-10	1.34737e-09	yes
ENSG00000148773	MKI67	11.0635	11.7357	12.7371	12.2126	17.9491	25.4759	52.9578	89.7416	118.308	36.4849	42.3693	40.9637	42.6101	33.7449	42.6439	31.6562	8.24947	4.08506	0.269186	0.00185361	30	42.36	9.36007	0	1.0824	0.0784395	0.918039	13.7991	1.15488e-10	1.35475e-09	yes
ENSG00000177370	TIMM22	0.307318	0.426753	0.849139	1.3878	2.05442	5.24232	12.0033	16.1925	12.2283	70.7494	73.3533	61.1895	77.7953	74.1037	58.7025	38.5452	5.51578	1.19747	0.0560608	0.00337385	28.5554	79.0436	0.795489	0	1.03163	0.0747719	0.918017	13.7971	1.15758e-10	1.35639e-09	yes
ENSG00000113719	ERGIC1	2.7966	4.51646	4.63167	6.83492	6.88411	13.4277	24.0424	42.7638	58.2898	148.64	123.557	141.837	130.786	122.911	131.694	126.816	86.8009	74.412	0.11735	0.000938971	29.9976	129.573	0.00536876	9.99845	0.936069	0.0679006	0.917894	13.7859	1.17244e-10	1.37226e-09	yes
ENSG00000137802	MAPKBP1	0.921955	1.70701	1.69828	2.28987	3.31591	8.27735	11.7525	15.3731	16.074	32.0443	15.1488	20.1405	13.8093	13.8311	12.2288	3.33511	1.13702	0.258912	0.132746	0.00945537	30	24.6287	0.896831	0.730258	1	0.0725608	0.917847	13.7815	1.17822e-10	1.37607e-09	yes
ENSG00000177981	ASB8	0.307318	0.78238	1.23511	1.73475	3.89258	12.0481	27.948	38.4718	44.6787	492.426	260.228	296.532	248.567	276.428	201.931	59.54	9.79776	2.33021	0.309152	0.00810106	30	392	0.00485188	9.0584	1.02986	0.0747283	0.917846	13.7815	1.17833e-10	1.37607e-09	yes
ENSG00000174928	C3orf33	0.0921955	0.320064	1.27371	0.90207	1.40566	2.57518	7.84693	9.44237	9.54932	57.8477	32.1439	37.4078	27.3821	28.3863	24.256	5.85012	0.798336	0.7192	0.079539	0.00889122	29.5562	47.1439	0	0.94361	1.00184	0.0727607	0.91771	13.769	1.19513e-10	1.39414e-09	yes
ENSG00000138138	ATAD1	1.07561	1.49363	4.36148	8.50028	11.065	19.2678	48.9089	45.6902	45.7158	117.556	94.68	111.967	76.8022	85.883	87.3259	48.9606	8.1648	2.22952	0.205772	0.00396871	29.1904	112.507	4.45229	0	1.01112	0.0736393	0.917288	13.7307	1.24845e-10	1.45471e-09	yes
ENSG00000123836	PFKFB2	0.33805	0.497878	0.96493	1.00616	1.94629	4.00072	9.96094	8.38889	9.16044	12.7217	10.9592	9.10304	6.85734	8.2552	7.70457	5.33071	2.32243	1.19747	0.0657543	0.00706807	28.5851	9.41258	0.389353	2.2024	1.00001	0.0728971	0.917149	13.7182	1.26647e-10	1.47407e-09	yes
ENSG00000204397	CARD16	2.88879	3.20064	3.55094	4.71852	3.78446	5.47225	6.84367	11.7054	12.1851	12.0016	14.5807	8.76168	8.98548	10.6207	7.99573	5.4674	2.79418	2.04972	0.033474	0.00342221	30	11.4025	3.19509	0.6575	0.999999	0.0729395	0.917058	13.71	1.27836e-10	1.48625e-09	yes
ENSG00000175445	LPL	29.4104	32.1843	32.6918	34.9032	18.0933	39.9612	80.2608	119.903	130.104	106.994	88.1471	106.619	87.3483	89.0451	97.8301	68.1511	25.5951	16.0022	0.362103	0.00235561	0	105.899	10	0	0.939281	0.0685231	0.917031	13.7075	1.28195e-10	1.4887e-09	yes
ENSG00000076984	MAP2K7	1.10635	0.853505	1.85267	3.64298	6.48764	21.2452	46.5441	83.2256	96.1846	211.708	115.604	128.694	136.059	102.828	112.007	44.2039	8.23738	2.0713	0.451481	0.00508807	30	165.322	0	0	1.03681	0.0756429	0.917021	13.7066	1.28332e-10	1.4887e-09	yes
ENSG00000169607	CKAP2L	0.430246	0.497878	0.308778	1.83884	2.41484	4.92043	14.6548	23.684	32.7961	45.9061	33.5877	54.1062	39.4652	34.3967	30.9974	9.95067	1.72973	1.11476	0.13011	0.00448373	30	46.9656	0	0	1.05259	0.0768519	0.916907	13.6963	1.29845e-10	1.50459e-09	yes
ENSG00000205476	CCDC85C	0.952687	1.06688	2.50882	5.06547	5.11803	16.4168	42.8535	97.5452	104.006	30.244	25.9897	31.69	35.3981	31.5001	27.5707	25.4234	7.76563	1.74406	0.288922	0.00199223	30	32.9437	0	0	1.07612	0.0785789	0.916889	13.6948	1.30078e-10	1.50562e-09	yes
ENSG00000120690	ELF1	0.153659	0.248939	0.540361	1.00616	1.00919	2.94306	9.5668	11.5884	10.111	36.7849	20.0485	30.0685	18.4439	21.8208	12.7439	1.94093	0.568512	0.19778	0.0894127	0.00857583	29.794	32.4026	0	0	1.02511	0.074883	0.916831	13.6895	1.30861e-10	1.51301e-09	yes
ENSG00000134684	YARS	3.01172	2.80945	3.04918	3.67767	5.65866	14.4854	26.2639	61.2194	88.2772	83.4711	101.521	80.5619	97.2324	95.3934	74.9852	66.9483	45.7834	44.2056	0.188598	0.0014011	30	83.1572	0.00132973	9.99898	1.00669	0.0736044	0.916691	13.677	1.32749e-10	1.53314e-09	yes
ENSG00000069011	PITX1	0.307318	1.35138	1.89126	2.56743	5.33428	18.67	25.189	61.5705	42.3454	148.82	100.337	109.805	117.994	110.552	95.9711	58.3372	11.334	3.34068	0.211225	0.00377067	30	132.845	0.641456	0	1.01788	0.074447	0.916641	13.6725	1.33429e-10	1.5393e-09	yes
ENSG00000076554	TPD52	2.36635	4.08971	8.18261	9.64521	16.94	21.5671	38.2672	81.8989	90.913	266.976	218.687	278.069	258.711	235.297	267.734	212.846	148.611	66.8317	0.201584	0.00138533	27.0503	270.486	5.65086	0	1.01894	0.0745488	0.916592	13.6681	1.34107e-10	1.5454e-09	yes
ENSG00000142453	CARM1	2.76586	2.31158	3.16497	2.42865	5.15407	14.1175	11.2867	31.0194	31.7591	170.963	139.558	138.708	144.217	131.456	143.005	120.83	69.3343	49.1357	0.0827633	0.00166333	28.5382	145.532	0.643804	9.98348	0.951021	0.0696163	0.916511	13.6609	1.35219e-10	1.55528e-09	yes
ENSG00000256087	ZNF432	0.614637	1.38695	0.887736	1.73475	1.62191	2.16131	3.18893	2.96537	2.80862	11.4615	7.40871	4.15326	2.17543	1.42414	1.09745	0.437392	0.18144	0.23374	0.0649275	0.0357269	30	11.2656	0.913979	0.347084	1	0.0732121	0.916489	13.659	1.35522e-10	1.55528e-09	yes
ENSG00000178935	ZNF552	0.153659	0	0.308778	0.520425	1.4417	2.20729	2.93812	2.73127	2.03085	3.24043	2.20131	2.24731	2.15179	0.337932	0.313558	0	0.205632	0	0.0474854	0.0192897	30	3.26029	0.140254	0.0467966	1	0.0732144	0.916485	13.6585	1.3559e-10	1.55528e-09	yes
ENSG00000168802	CHTF8	2.1205	3.34289	3.55094	8.70845	11.7138	32.4196	174.066	184.946	182.431	260.615	289.91	212.499	301.037	220.139	215.482	132.584	21.6639	4.86179	0.832498	0.00374096	30	290.358	0	0	1.01852	0.0745745	0.916476	13.6578	1.35707e-10	1.55528e-09	yes
ENSG00000115806	GORASP2	0.276586	0.711254	1.00353	1.07555	3.49612	5.38028	13.329	19.1189	19.2715	28.9239	29.9899	29.7271	31.4492	34.107	33.3267	21.1315	6.08429	2.07849	0.0620501	0.00249059	29.998	34.2171	0.952039	0	1.02935	0.0753672	0.916476	13.6578	1.35708e-10	1.55528e-09	yes
ENSG00000089094	KDM2B	0.184391	0.533441	0.771944	2.39396	2.09046	7.03575	19.9935	24.0742	25.364	43.6258	32.7593	28.447	32.9389	26.769	35.4321	19.7373	5.96333	2.08928	0.0966664	0.00316107	27.4053	37.9025	0.492307	0	1.0084	0.0738732	0.916393	13.6504	1.3686e-10	1.56676e-09	yes
ENSG00000068745	IP6K2	1.59806	1.84926	4.05271	7.21656	13.7322	20.5554	43.9285	71.8713	67.4934	35.2247	31.5048	30.0969	37.6917	42.1691	31.7365	14.5159	3.71347	3.0566	0.274841	0.00354581	26.849	39.3406	2.48117	0	1.00204	0.0734126	0.916383	13.6494	1.37009e-10	1.56676e-09	yes
ENSG00000090316	MAEA	2.0283	2.13376	1.96846	4.05932	6.59577	14.7613	48.3715	92.1607	64.1663	138.318	133.286	134.753	125.915	140.507	115.345	97.7844	27.8934	9.28847	0.261122	0.00267845	30	147.748	1.29405	0	1.02029	0.0747559	0.916369	13.6482	1.37198e-10	1.56721e-09	yes
ENSG00000196449	YRDC	0.891223	2.34714	3.62814	7.59821	7.56891	15.3131	25.2248	30.3561	22.3394	28.6238	28.4513	37.9767	24.45	24.0897	16.9545	10.1967	3.77395	1.17589	0.170153	0.00617963	5.97747	31.2601	0.891221	2.30691	1	0.0732928	0.91632	13.6439	1.37882e-10	1.57142e-09	yes
ENSG00000119707	RBM25	1.16781	2.13376	6.44573	10.7208	25.6983	42.9043	119.065	239.142	260.77	1332.36	798.839	867.15	703.019	756.702	621.091	323.26	60.6735	21.0114	1.34761	0.00580991	30	1066.12	0	10	1.02437	0.0750825	0.916313	13.6433	1.37981e-10	1.57142e-09	yes
ENSG00000144935	TRPC1	0.122927	0.248939	0.27018	0.173475	0.180212	0.413868	1.07492	1.09251	0.993821	5.34071	3.57417	3.72656	4.04347	4.15174	2.79962	1.58555	0.399168	0.039556	0.00466197	0.00457632	29.7233	4.74923	0.170035	0	1.01016	0.074042	0.916311	13.643	1.38018e-10	1.57142e-09	yes
ENSG00000145908	ZNF300	1.99757	1.24469	4.43868	5.89815	7.92934	22.0729	41.4203	48.1873	50.5552	44.5859	67.4832	68.0737	42.4682	37.3173	25.9805	14.6526	5.08032	2.39134	0.312361	0.00624762	29.9412	59.5872	1.83998	1.60037	1.00056	0.0733618	0.916262	13.6387	1.38703e-10	1.5775e-09	yes
ENSG00000135372	NAT10	1.19854	2.63164	3.01058	4.92669	9.91167	21.6591	37.8731	73.5881	67.1909	671.309	406.414	420.56	365.733	415.825	369.707	268.969	83.3898	28.7572	0.291202	0.00370095	27.821	510.135	5.4734e-06	9.92546	0.992882	0.072808	0.916243	13.637	1.38978e-10	1.57891e-09	yes
ENSG00000145375	SPATA5	0.491709	0.92463	1.04212	1.52658	1.22544	3.08101	9.63846	7.99871	9.07402	26.3435	18.0602	21.1646	20.2883	16.0518	14.0653	10.6614	2.20147	0.212164	0.0412678	0.00430407	25.3202	23.3689	0.708091	0	1.00451	0.0736753	0.916212	13.6343	1.39411e-10	1.58211e-09	yes
ENSG00000185721	DRG1	2.05903	1.63588	2.00705	2.35926	4.03675	7.8175	23.3975	43.9344	70.2588	74.77	83.9812	74.3605	89.1218	90.0106	78.3447	69.518	40.0499	24.1615	0.153961	0.00164045	29.9975	76.7648	0.00405985	10	1.04483	0.0766616	0.916155	13.6292	1.40232e-10	1.5897e-09	yes
ENSG00000137145	DENND4C	0.153659	0.995756	2.35443	3.5042	2.77527	5.47225	7.56028	7.84263	9.29007	86.7116	51.7426	54.9027	56.7977	41.4449	42.7783	19.874	2.99981	0.32364	0.0455683	0.00598443	29.9771	70.7671	1.64598	0.356012	0.999599	0.073351	0.916137	13.6276	1.40482e-10	1.59081e-09	yes
ENSG00000147099	HDAC8	3.34977	4.65872	5.5966	8.22272	9.55125	13.0598	30.2053	44.8318	43.296	38.0451	37.4459	28.191	35.138	23.5345	28.8697	25.3141	11.842	5.8399	0.150459	0.00312227	24.4485	31.1237	4.29799	5.09505	1.00033	0.0734829	0.915973	13.613	1.42855e-10	1.61472e-09	yes
ENSG00000128563	PRKRIP1	0.245855	0.284502	0.926333	3.29603	3.02757	7.54159	13.6873	12.7589	15.7283	57.6077	33.9665	29.1866	35.5163	26.1173	26.2941	15.0353	4.05216	1.8843	0.111855	0.00758861	23.147	41.8545	0.265173	3.99403	0.999994	0.07346	0.915969	13.6128	1.42902e-10	1.61472e-09	yes
ENSG00000140691	ARMC5	0.368782	1.70701	4.59307	12.3514	14.4891	38.9955	118.098	124.39	152.443	224.49	150.162	114.3	176.943	167.807	136.465	71.3222	11.0436	2.94872	0.671134	0.00421197	30	191.129	0.991465	0	1.01366	0.0744787	0.91594	13.6101	1.43335e-10	1.61786e-09	yes
ENSG00000120705	ETF1	5.83905	6.82804	10.3826	16.4801	21.6615	41.1109	120.57	226.5	253.77	233.431	298.266	309.959	315.58	295.256	279.246	228.264	138.717	56.6873	0.668441	0.0017602	29.9341	299.862	0.0254597	9.98277	1.00653	0.0739642	0.915919	13.6083	1.43636e-10	1.61852e-09	yes
ENSG00000187555	USP7	4.30246	5.12103	8.2984	9.26357	17.6248	31.5459	60.3389	68.7889	55.2219	156.801	164.27	171.194	144.737	145.166	143.296	93.9846	37.5944	14.6933	0.206583	0.00282005	0	173.735	7.03559	0.00755185	1.02456	0.0752914	0.915914	13.6079	1.43703e-10	1.61852e-09	yes
ENSG00000183605	SFXN4	0.860491	0.92463	1.4281	2.56743	3.8205	10.0708	22.9317	43.3491	76.6538	64.5086	65.2345	48.2461	62.5437	61.5278	58.6577	52.9791	32.127	16.2144	0.151428	0.00133621	30	63.8337	0	0	1.05533	0.0775656	0.915889	13.6056	1.4408e-10	1.62101e-09	yes
ENSG00000127554	GFER	0.368782	0.711254	0.463167	0.797985	2.52297	3.86276	9.5668	18.8847	29.8578	79.3906	72.0278	57.3776	72.0494	44.3656	52.8345	44.2313	15.4466	8.86774	0.0825692	0.00277763	30	71.8287	0	0	1.0222	0.0751464	0.915857	13.6028	1.44542e-10	1.62446e-09	yes
ENSG00000125447	GGA3	0.983419	1.24469	2.62461	3.19194	6.63181	12.3241	31.0652	26.7274	24.8023	74.83	45.3044	54.9027	48.6871	48.2036	38.6348	18.0424	4.5239	1.36648	0.166062	0.00589357	29.5083	63.0286	1.87629	1.92534	1.00011	0.0735424	0.915815	13.5991	1.45164e-10	1.62971e-09	yes
ENSG00000107175	CREB3	0.491709	0.426753	0.887736	0.659205	1.1894	2.62116	8.09774	15.8023	36.0368	38.5251	44.2866	34.4493	35.469	34.3484	31.3334	25.6421	17.9384	13.7403	0.0666778	0.0014553	30	38.5602	0	0	1.04979	0.0772045	0.915797	13.5975	1.45428e-10	1.63092e-09	yes
ENSG00000120063	GNA13	0.153659	0.177814	1.00353	1.83884	2.45089	6.62188	16.303	24.3473	27.6541	16.5622	14.3203	19.7422	14.7788	17.138	17.9848	7.35365	0.895104	1.35929	0.099847	0.00319142	30	18.5788	0.163264	0	1.0283	0.0756458	0.915752	13.5936	1.46089e-10	1.63657e-09	yes
ENSG00000163840	DTX3L	0.245855	0.746817	0.656153	0.76329	1.54983	3.77079	12.3974	16.0364	18.4073	42.0056	39.4579	24.9196	26.3653	34.2277	34.6482	16.2382	2.81837	0.654472	0.0732106	0.00362566	30	38.5953	4.08848e-06	0	1.02094	0.0751123	0.915737	13.5922	1.46315e-10	1.63735e-09	yes
ENSG00000122778	KIAA1549	0.184391	0.960193	0.733347	1.73475	3.02757	4.78247	10.9284	12.3297	9.54932	48.0664	28.617	25.6592	23.8588	27.5656	20.2469	10.6614	2.49178	0.733584	0.0845817	0.0077558	29.6055	36.4253	0.553614	2.28658	0.999998	0.0735785	0.915722	13.5909	1.46538e-10	1.63809e-09	yes
ENSG00000095380	NANS	0.829759	0.533441	1.3509	1.73475	2.55901	3.4489	10.3551	23.6059	38.8022	53.4071	54.9381	49.6685	53.0616	46.3691	32.0949	32.8044	23.4662	20.7885	0.0872726	0.00189108	30	47.2603	0	4.92094	1.01102	0.0744567	0.915582	13.5786	1.48631e-10	1.65972e-09	yes
ENSG00000249590	AC004832.3	1.19854	3.52071	6.13696	7.6676	18.3456	30.4423	70.6582	124.234	217.344	243.392	221.717	197.052	273.513	190.425	188.493	175.039	68.2214	24.9634	0.518105	0.00214372	30	241.512	0	0	1.0473	0.0771588	0.915522	13.5733	1.49539e-10	1.66807e-09	yes
ENSG00000164649	CDCA7L	1.16781	0.995756	1.54389	1.59597	2.30672	5.79415	15.7655	35.9747	35.0862	68.4091	78.5371	66.0539	75.2889	86.414	72.0735	56.1229	22.9824	6.40088	0.105852	0.00217057	30	81.2562	2.04822e-07	0	1.02864	0.0757898	0.91551	13.5723	1.49706e-10	1.66815e-09	yes
ENSG00000079616	KIF22	0.829759	0.746817	1.19651	4.51035	5.76679	15.1751	42.8535	106.402	111.87	135.438	179.963	136.318	175.619	170.728	141.683	108.528	56.7181	30.5121	0.32143	0.00218138	29.1739	159.5	0.0676128	10	1.04349	0.0769104	0.915457	13.5676	1.50518e-10	1.67542e-09	yes
ENSG00000071537	SEL1L	0.184391	0.92463	1.3509	1.21433	1.83816	2.20729	7.56028	10.0276	7.56168	24.4233	25.8476	24.5782	24.8283	27.6621	19.9781	12.2196	5.49158	2.17918	0.0308405	0.00309315	29.6672	27.6837	0.89098	0	1.01069	0.074548	0.915342	13.5576	1.5227e-10	1.69311e-09	yes
ENSG00000166073	GPR176	0.0921955	0.248939	0.192986	0.312255	0.468552	1.19562	3.43975	4.29199	4.23454	5.34071	3.50316	3.92569	4.23263	4.70691	4.25543	2.29631	0.72576	0.39556	0.0165825	0.00323954	30	4.87885	0.160052	0.0157135	1	0.0737776	0.915304	13.5543	1.5286e-10	1.69787e-09	yes
ENSG00000149930	TAOK2	0.276586	0.462315	0.617555	0.589815	2.30672	7.31166	12.3258	14.1636	17.9752	6.18082	9.53901	6.74194	6.02973	7.77244	3.53873	0.902121	1.01606	0.154628	0.0939447	0.00549615	29.4373	8.20212	0.127243	0	1.00916	0.0744973	0.915213	13.5463	1.54273e-10	1.71086e-09	yes
ENSG00000177519	RPRM	0.0921955	0.248939	0.27018	0.41634	0.901061	2.06934	5.69708	5.85271	3.93207	34.7446	26.6524	26.3135	25.2303	26.769	19.5078	4.18256	0.6048	0.52142	0.0325408	0.0060056	30	33.233	0.176275	0	1.01287	0.0747739	0.915207	13.5458	1.54357e-10	1.71086e-09	yes
ENSG00000184436	THAP7	0.491709	0.213376	1.69828	1.52658	2.3788	6.52991	11.9675	15.9974	12.7036	57.3676	75.3653	43.6377	64.5063	60.2484	23.9648	11.6456	2.15309	0.32364	0.0905595	0.0062617	29.4828	69.4831	0.544684	0	1.01199	0.0747211	0.915181	13.5435	1.54763e-10	1.71354e-09	yes
ENSG00000119537	KDSR	2.18196	2.31158	4.67026	5.37773	12.0742	20.2335	37.3356	58.4881	61.6169	287.678	175.679	240.605	187.749	242.297	222.425	120.584	31.6431	12.9888	0.244222	0.00340284	29.9672	245.708	0.0189179	9.9868	0.980897	0.0724404	0.915149	13.5407	1.55262e-10	1.71678e-09	yes
ENSG00000198876	DCAF12	0.33805	0.426753	0.849139	1.17963	2.66714	7.17371	20.101	23.9181	22.0801	28.3838	24.2854	24.3506	26.9091	21.0966	27.7275	12.247	2.4071	0.82708	0.0992023	0.00362115	29.4099	29.0565	0.537228	0	1.00805	0.0744491	0.915141	13.5401	1.55384e-10	1.71678e-09	yes
ENSG00000013810	TACC3	2.91952	4.58759	5.78958	7.07778	10.8488	29.4306	58.0099	85.6057	89.4871	113.835	91.2005	129.747	104.184	117.214	116.666	78.7579	33.0221	14.2977	0.267264	0.00224561	14.7188	122.346	2.91954	0	1.01689	0.075122	0.915101	13.5365	1.56021e-10	1.71958e-09	yes
ENSG00000134910	STT3A	1.01415	1.38695	1.85267	1.52658	2.30672	4.6905	8.06191	13.4612	19.3147	34.2646	37.3986	40.9352	34.1448	38.0656	37.9405	32.1756	25.1839	22.0507	0.0365011	0.00112731	29.5847	28.3263	1.28588	10	1.00937	0.0745688	0.915096	13.5361	1.56091e-10	1.71958e-09	yes
ENSG00000196843	ARID5A	0.645368	0.640129	2.08425	9.26357	12.1103	20.6934	35.9024	46.5876	62.7403	33.6645	45.6121	27.3091	44.1944	28.3863	26.0701	12.4657	2.92723	2.49203	0.241123	0.00389939	12.3144	39.7719	3.31704e-07	0	1.0218	0.0754885	0.915094	13.5359	1.56131e-10	1.71958e-09	yes
ENSG00000154864	PIEZO2	0.983419	0.640129	1.3895	1.45719	1.94629	4.27663	7.59611	7.64754	6.26539	14.4019	9.68103	13.2279	7.33026	7.36209	5.86801	4.23724	2.15309	1.29456	0.0666402	0.0103032	30	11.2647	0.783993	2.10066	1.00002	0.073894	0.915062	13.5331	1.56635e-10	1.72332e-09	yes
ENSG00000042286	AIFM2	3.04245	5.36997	5.94397	9.81869	21.3011	34.259	50.4496	90.4049	116.666	34.5046	53.4469	50.209	50.1532	44.5105	37.9629	21.6509	14.8902	8.3571	0.303742	0.00219146	19.7732	48.4089	4.21103	0	1.03676	0.076645	0.914988	13.5267	1.57797e-10	1.73427e-09	yes
ENSG00000144597	EAF1	0.215123	0.284502	0.771944	1.56128	1.80212	3.90875	10.0326	9.67648	8.25303	22.563	12.7581	20.0836	11.1846	12.238	6.78629	1.50354	0.955584	0.496248	0.0901211	0.00986135	30	20.2546	0.154015	0.363925	1	0.0739608	0.914919	13.5207	1.58903e-10	1.74459e-09	yes
ENSG00000197355	UAP1L1	0.860491	0.355627	0.617555	0.76329	3.60424	5.42626	6.16288	14.0465	23.6789	27.1236	32.6173	24.2937	30.0777	26.069	23.6064	23.2365	13.2572	4.78987	0.0504761	0.00171756	30	29.687	0.439977	0	1.03235	0.076361	0.914903	13.5193	1.59157e-10	1.74555e-09	yes
ENSG00000127125	PPCS	0.583905	1.38695	5.63519	7.56351	13.552	11.4963	41.7428	89.2343	122.802	161.842	125.546	169.146	117.308	98.821	123.519	79.25	36.7356	13.1973	0.347815	0.00265324	30	148.275	0	0	1.03555	0.0766235	0.91485	13.5147	1.59998e-10	1.75294e-09	yes
ENSG00000173928	SWSAP1	0.0307318	0.177814	0.849139	0.589815	0.504594	1.14963	1.89903	2.10698	1.55555	6.48086	6.34356	5.40493	6.05338	5.81726	3.51633	0.683425	0.12096	0.10788	0.0114979	0.00619913	0	7.06321	0.150401	0	1.01534	0.0751594	0.914786	13.5092	1.61033e-10	1.76242e-09	yes
ENSG00000128881	TTBK2	0.0921955	0.177814	1.31231	1.31841	1.36961	1.83941	4.33552	3.2385	3.75924	14.0419	12.5451	10.7245	13.9511	9.60692	4.94974	2.46033	0.350784	0.039556	0.0268782	0.00712192	0	14.594	0.147338	0	1.00564	0.074472	0.914722	13.5036	1.62065e-10	1.77187e-09	yes
ENSG00000173039	RELA	3.13465	2.98727	11.116	18.1108	27.8969	69.6217	231.538	374.378	400.985	272.556	353.63	259.266	363.675	259.677	299.291	181.736	35.1994	21.4465	1.41667	0.00299042	29.9561	325.447	0.197397	9.99668	1.04376	0.0773064	0.914698	13.5016	1.62452e-10	1.77424e-09	yes
ENSG00000180008	SOCS4	0.153659	0.355627	0.96493	1.94292	2.84735	9.42699	25.3323	23.645	19.6604	20.7028	11.2669	13.2563	7.33026	8.18278	2.9788	0	0.338688	0.32364	0.244393	0.0110377	30	16.7169	0	0	1.05367	0.0780558	0.914667	13.4989	1.62957e-10	1.7779e-09	yes
ENSG00000164053	ATRIP	0.430246	0.284502	2.20004	5.10017	10.4523	19.7277	32.0685	46.7046	39.2775	363.648	289.034	188.661	226.883	256.683	221.708	140.786	11.9629	3.07098	0.21753	0.00445121	29.9421	298.673	0.0552446	9.996	0.978743	0.0725126	0.914652	13.4976	1.6321e-10	1.77817e-09	yes
ENSG00000139370	SLC15A4	0.430246	1.28026	2.39303	1.3878	5.2622	8.00144	14.3323	26.0251	21.6048	43.3858	53.0681	54.1631	52.8252	47.0691	45.0852	37.2603	7.45114	2.2511	0.0761935	0.00268585	29.8023	55.1671	1.68849	0	1.03192	0.0764556	0.914645	13.497	1.63322e-10	1.77817e-09	yes
ENSG00000183688	RFLNB	1.29074	1.31582	1.15792	2.42865	2.09046	5.47225	16.5538	25.6349	29.901	121.876	88.2654	120.615	91.8174	87.6934	106.251	81.0542	41.7675	14.5998	0.0801716	0.00199077	30	112.393	0.894928	0	1.01988	0.0755731	0.914626	13.4953	1.6363e-10	1.77967e-09	yes
ENSG00000048405	ZNF800	0.184391	0.426753	0.27018	1.17963	2.45089	5.05838	10.4267	11.6274	7.95057	15.6621	14.6281	11.4357	5.10754	5.81726	5.08412	2.78837	0.217728	0.86304	0.135785	0.0142032	30	14.6896	0	0.917626	1.00963	0.0748519	0.914545	13.4884	1.64957e-10	1.79223e-09	yes
ENSG00000272398	CD24	3.4727	5.83228	6.60012	11.9004	15.6424	34.6729	64.2445	160.833	159.487	233.551	286.431	240.349	234.687	291.322	240.925	201.774	132.016	91.3887	0.408079	0.00148103	29.9877	260.372	0.0216967	9.9933	0.983122	0.0728928	0.914532	13.4872	1.65175e-10	1.79274e-09	yes
ENSG00000011198	ABHD5	0.307318	1.45807	2.35443	3.33072	7.53287	19.2678	36.7265	59.7757	46.796	117.256	100.077	155.89	118.608	113.449	62.4428	16.4569	3.76186	2.77252	0.309365	0.00569957	30	137.891	0.176944	0	1.01751	0.0754663	0.914483	13.483	1.65993e-10	1.79975e-09	yes
ENSG00000148358	GPR107	2.21269	4.55203	6.05976	13.7045	14.1286	32.8335	73.023	86.0739	117.66	85.0913	85.2357	64.6885	85.0074	65.1967	71.7376	68.5065	35.5622	18.3971	0.300286	0.0019703	6.33131	78.0196	2.21237	5.77704	1	0.0742493	0.91431	13.4681	1.6887e-10	1.82904e-09	yes
ENSG00000130956	HABP4	0.184391	0	0.926333	0.76329	1.87421	3.58685	6.95116	11.1592	8.64192	19.3226	17.9419	13.5977	11.3028	14.338	11.8256	10.6614	3.38688	2.2439	0.0434123	0.0040744	29.9814	15.3599	0.429384	2.02404	1.00002	0.0742805	0.914247	13.4627	1.69938e-10	1.83871e-09	yes
ENSG00000163516	ANKZF1	0.553173	0.746817	1.27371	4.78791	9.19082	19.8656	47.5115	75.7341	76.8699	67.149	80.8094	53.3381	72.2149	74.514	65.5784	43.3018	6.53184	1.9742	0.323559	0.00373469	29.9657	67.9841	0.0564833	9.98778	1.05372	0.07829	0.914207	13.4592	1.70621e-10	1.84419e-09	yes
ENSG00000186642	PDE2A	14.9664	13.6205	15.9021	13.2188	14.7053	52.2393	104.017	154.551	229.011	392.992	461.021	298.665	431.492	393.643	358.173	321.592	170.324	86.0307	0.53179	0.00181824	29.9998	412.615	7.77771	10	1.01255	0.0752422	0.914183	13.4572	1.71026e-10	1.84666e-09	yes
ENSG00000144136	SLC20A1	1.10635	5.65447	12.7757	26.507	38.2771	38.9036	82.6256	81.1576	76.8267	95.8328	125.143	121.696	104.373	104.107	87.6619	32.367	5.08032	3.58162	0.402028	0.00468475	0	126.381	6.10504	0	1.00598	0.0748259	0.914033	13.4443	1.73603e-10	1.87068e-09	yes
ENSG00000135454	B4GALNT1	0.860491	0.995756	0.424569	0.659205	2.27067	5.97809	15.5147	28.2881	32.2344	19.0825	22.0604	17.5802	20.4065	21.7725	23.3377	12.8211	6.27782	3.82255	0.0910907	0.0020937	30	22.1812	5.86272e-07	0	1.01608	0.0755771	0.914032	13.4442	1.73619e-10	1.87068e-09	yes
ENSG00000170027	YWHAG	2.91952	3.9119	5.5966	10.4779	13.7322	37.7539	136.587	173.865	142.808	497.166	348.967	475.605	335.915	361.129	374.948	198.193	27.0708	8.70232	0.735161	0.00397628	29.824	454.679	0.0330929	9.97009	1.01717	0.0756633	0.914022	13.4434	1.73788e-10	1.87068e-09	yes
ENSG00000130810	PPAN	0.368782	0.320064	0.926333	2.04701	6.05513	17.3824	33.0001	28.9514	21.3455	79.0305	81.8745	71.9709	74.3194	66.5726	40.225	18.0151	5.56416	0.535804	0.178665	0.00608742	29.3986	87.3812	1.40687	0.325564	1.00014	0.0744064	0.914002	13.4417	1.74141e-10	1.87196e-09	yes
ENSG00000077232	DNAJC10	0.983419	1.67145	2.7404	0.867375	4.00071	5.61021	11.5017	15.4121	16.2036	44.3459	34.3215	50.6072	37.6444	37.9449	33.2148	29.2233	17.8416	9.32443	0.0430367	0.00193256	0	43.4023	1.08234	0	1.00231	0.0745707	0.913994	13.441	1.74265e-10	1.87196e-09	yes
ENSG00000168140	VASN	0.491709	0.426753	3.01058	6.41858	8.75832	19.0379	35.5082	49.2798	37.8516	83.0511	47.1743	73.0234	51.6902	57.1346	49.0942	27.3643	5.51578	1.17589	0.21641	0.00450016	13.6703	72.3882	0.49175	0	1.00154	0.0745453	0.913928	13.4354	1.7542e-10	1.88243e-09	yes
ENSG00000175387	SMAD2	4.27172	5.12103	9.03175	13.0106	18.2375	36.4663	70.1924	80.0261	69.1786	140.719	137.878	169.174	129.651	154.049	129.477	73.7279	17.1158	7.95795	0.296295	0.00364809	26.0904	155.603	9.43103	7.67474	1.03164	0.0768157	0.913865	13.43	1.76509e-10	1.89218e-09	yes
ENSG00000166170	BAG5	1.53659	1.60032	3.55094	8.63906	14.0926	36.6043	93.3032	83.9279	80.2402	110.055	104.692	134.725	106.171	109.393	75.9706	7.70903	3.58042	1.92746	0.556237	0.00607373	30	132.325	2.20842	0	1.00937	0.0751723	0.913834	13.4274	1.77056e-10	1.8961e-09	yes
ENSG00000111540	RAB5B	4.0566	6.40129	8.2598	10.0962	15.7145	57.9415	170.196	239.922	246.813	996.433	752.872	705.457	661.308	729.74	712.359	399.968	26.4177	4.27205	1.23835	0.00517918	29.7927	1018.05	9.11526	9.99777	0.939164	0.0699588	0.913801	13.4245	1.77638e-10	1.90039e-09	yes
ENSG00000106605	BLVRA	0.799028	0.569003	1.08072	1.3878	0.720849	3.40291	9.17266	21.8501	26.79	32.5243	48.5235	41.4188	40.9549	40.6001	35.1633	26.0795	16.8618	14.1251	0.0646859	0.00167944	30	42.4266	0	0	1.00772	0.0750762	0.913779	13.4226	1.78035e-10	1.90268e-09	yes
ENSG00000171161	ZNF672	0.737564	0.817942	0.887736	1.83884	3.60424	7.72553	13.1499	12.5638	8.12341	100.693	90.6798	71.2882	72.2858	74.7312	47.1233	10.9075	1.00397	0.668856	0.0785259	0.00712936	29.8198	100.114	1.21077	0	1.00951	0.0752285	0.913739	13.4192	1.78737e-10	1.90629e-09	yes
ENSG00000127989	MTERF1	0.153659	0.569003	1.46669	2.94908	4.68552	6.39196	14.1531	18.3775	13.9135	57.1876	31.8598	46.2833	39.1578	21.3863	24.0992	3.60848	1.13702	0.765948	0.132777	0.00866979	30	50.757	0.652431	0.148622	1	0.0745199	0.913739	13.4192	1.78737e-10	1.90629e-09	yes
ENSG00000164219	PGGT1B	0.0921955	1.38695	1.27371	2.35926	3.02757	5.10437	10.7492	15.4902	15.4258	20.7028	23.9067	23.3265	18.633	28.5553	21.21	12.2196	4.07635	0.632896	0.0533639	0.00297303	28.1112	25.3051	1.19705	0	1.02617	0.0764814	0.913716	13.4173	1.7914e-10	1.90864e-09	yes
ENSG00000054267	ARID4B	3.19611	5.0499	7.52646	10.9636	12.0021	16.3248	38.6972	53.3377	63.3021	148.76	76.1464	111.228	80.7511	81.683	79.8453	36.0848	7.43904	2.38415	0.277041	0.0049097	28.346	117.896	3.96109	0	1.00747	0.0750937	0.913702	13.4161	1.79383e-10	1.90928e-09	yes
ENSG00000101745	ANKRD12	1.04488	2.24045	5.44221	8.43089	13.1555	24.7401	49.1239	89.2734	93.7216	39.0652	25.8003	34.7622	20.9504	21.0001	15.8571	4.42859	1.56038	1.63978	0.376543	0.00378804	29.6518	30.464	1.52539	0	1.0749	0.0802135	0.913519	13.4005	1.82671e-10	1.94229e-09	yes
ENSG00000109805	NCAPG	1.72098	1.42251	2.23864	3.85115	6.09117	11.8642	30.5278	46.3145	51.8083	166.822	149.334	210.11	159.918	153.976	175.324	118.123	69.3585	24.4276	0.15521	0.00218213	29.9811	173.447	0.00313924	9.98594	0.993109	0.0741181	0.913501	13.399	1.82999e-10	1.9438e-09	yes
ENSG00000243056	EIF4EBP3	0	0.213376	0.501764	0.34695	1.47774	1.97737	3.29643	3.51163	3.80245	8.58114	5.87016	5.74629	3.57055	4.90001	4.59138	2.84305	0.495936	0.064728	0.022584	0.00566331	4.7045	6.70342	2.23858e-06	0.278166	0.999996	0.0746938	0.91337	13.3879	1.8537e-10	1.967e-09	yes
ENSG00000089486	CDIP1	0.768296	1.13801	1.08072	1.83884	1.94629	4.23065	14.0815	29.1075	26.5307	76.3302	86.3245	82.3541	83.1393	94.2348	85.6685	60.0321	25.5347	17.7714	0.0877983	0.00239736	29.7602	81.4981	0.00079656	9.99996	1.02285	0.0764311	0.913308	13.3827	1.86511e-10	1.97709e-09	yes
ENSG00000108528	SLC25A11	2.08976	2.59608	1.89126	3.08786	4.90177	10.8985	33.1076	69.6863	85.1229	212.848	240.369	210.821	262.967	248.042	220.655	211.807	88.6153	34.5396	0.213706	0.00179443	29.9893	252.93	0.00272176	0	1.03416	0.0773139	0.91323	13.3761	1.87954e-10	1.99037e-09	yes
ENSG00000146670	CDCA5	0.522441	0.426753	1.27371	2.7756	3.38799	8.82918	25.6906	52.0111	52.975	119.416	80.2886	132.25	87.774	109.128	92.6116	40.5681	11.2614	4.78987	0.207856	0.00361402	30	118.147	0	0	1.04106	0.0778354	0.913219	13.3752	1.88147e-10	1.9904e-09	yes
ENSG00000113621	TXNDC15	1.90537	2.84502	3.93692	3.74706	3.64029	10.8065	30.8861	64.3018	73.1971	159.921	135.724	114.243	111.987	98.7486	91.4917	91.0322	57.3229	42.6378	0.201925	0.00208863	29.9097	121.406	0.246191	9.98047	0.985367	0.073685	0.91319	13.3727	1.88697e-10	1.99419e-09	yes
ENSG00000061273	HDAC7	41.2114	40.5415	51.0641	62.9714	107.587	223.075	533.018	497.949	512.034	758.981	669.364	561.629	696.824	658.388	572.803	372.74	64.5443	14.1539	2.58046	0.00405544	29.8991	761.391	0.0831071	7.55637	0.922182	0.0689674	0.913173	13.3713	1.8901e-10	1.99548e-09	yes
ENSG00000197586	ENTPD6	0	0.889068	0.578958	2.0817	0.901061	2.52919	9.31598	8.1938	13.8271	54.3072	52.1923	51.3468	45.0456	51.4139	45.8019	44.696	19.8374	8.01908	0.032264	0.00190273	29.9798	55.0704	0.745394	0	1.02457	0.076647	0.913127	13.3674	1.89857e-10	2.00045e-09	yes
ENSG00000241258	CRCP	0.491709	1.45807	4.67026	4.61444	6.77598	14.5314	50.3421	53.1426	47.3577	144.979	118.705	167.724	92.7869	87.1865	82.085	25.6421	7.03987	3.44137	0.336523	0.00630869	30	148.083	0.468923	0.0623572	1	0.0748088	0.913127	13.3674	1.89863e-10	2.00045e-09	yes
ENSG00000105364	MRPL4	8.08247	8.03717	6.67732	12.4902	19.7152	36.7423	94.3064	200.553	253.511	739.719	521.781	451.169	497.701	494.781	455.465	376.212	230.731	146.005	0.662714	0.00204418	29.7094	569.733	0.043271	9.93651	0.995574	0.074488	0.913105	13.3656	1.90272e-10	2.00274e-09	yes
ENSG00000073464	CLCN4	0.491709	0.426753	0.617555	1.00616	1.36961	2.39124	7.84693	8.54496	7.90736	23.2831	15.4328	24.2937	15.6537	19.6483	11.6016	7.90039	1.25798	0.73718	0.0418672	0.00471531	30	22.3042	0.424721	0	1.00503	0.0752025	0.91309	13.3643	1.90559e-10	2.00356e-09	yes
ENSG00000006638	TBXA2R	0.122927	0.640129	0.308778	0.62451	1.83816	3.40291	9.42348	14.8269	14.3456	72.4897	63.1279	61.7015	84.3689	68.8174	54.4919	56.5056	22.5348	8.78143	0.0439545	0.00214573	29.1466	74.775	0.431133	0	1.02178	0.0764605	0.91308	13.3635	1.90733e-10	2.00356e-09	yes
ENSG00000228300	C19orf24	0.706832	0.355627	0.540361	1.45719	2.81131	4.78247	13.0424	26.7664	49.9071	76.6902	59.3407	52.2002	66.6344	57.2795	56.5076	32.2577	20.0068	13.0247	0.11825	0.00233696	30	67.0683	0	0	1.03932	0.0778115	0.913001	13.3568	1.92223e-10	2.01718e-09	yes
ENSG00000108389	MTMR4	1.10635	1.49363	4.24569	4.57974	7.10036	11.3124	30.3486	56.3031	68.1416	39.2452	55.8612	42.8127	39.9144	46.9725	48.064	32.5857	13.4749	4.66042	0.183306	0.00211489	30	49.2382	1.19443	0	1.03922	0.0778107	0.912988	13.3557	1.92479e-10	2.01785e-09	yes
ENSG00000204498	NFKBIL1	0.276586	0.106688	0.347375	1.56128	4.32509	10.7606	16.9838	12.876	15.9443	46.9863	50.6301	33.795	49.8694	38.5967	20.3589	8.28311	3.30221	0.679644	0.107441	0.00663225	29.8297	51.6795	0.865349	0.245318	1.00002	0.0748854	0.912968	13.354	1.92851e-10	2.01972e-09	yes
ENSG00000101391	CDK5RAP1	2.91952	5.33441	7.71944	14.0515	14.5972	17.4744	39.9512	52.2842	63.9502	186.625	238.239	179.785	196.262	234.38	142.781	153.497	90.9014	34.5396	0.157611	0.00195605	0	215.886	4.29605	0	1.01229	0.0758174	0.91294	13.3517	1.93376e-10	2.02319e-09	yes
ENSG00000172667	ZMAT3	0.184391	0.106688	0.192986	0.451035	0.720849	1.51751	6.84367	9.32532	8.5555	24.4833	16.3323	20.7094	17.6399	24.0897	17.8728	8.85719	1.05235	0.532208	0.0386833	0.00373635	30	23.1773	0	0	1.03125	0.0772455	0.912923	13.3503	1.93696e-10	2.02451e-09	yes
ENSG00000182220	ATP6AP2	16.964	25.2851	14.8599	42.9177	61.5605	80.9801	185.567	348.353	466.016	678.871	815.526	798.479	855.56	717.237	763.133	593.541	489.815	426.054	0.859578	0.000928571	1.1112	798.267	9.82435	0.184258	1.00609	0.0754002	0.912841	13.3434	1.95264e-10	2.03886e-09	yes
ENSG00000163125	RPRD2	2.85806	5.36997	9.03175	13.3576	16.9039	40.1452	82.7689	82.1721	72.6786	42.2456	41.5408	49.4693	40.9785	34.638	36.4175	6.7249	2.1289	1.13634	0.587749	0.00746586	30	47.4705	5.11729	3.81608	1.00001	0.0749998	0.912723	13.3335	1.9753e-10	2.06046e-09	yes
ENSG00000143476	DTL	1.22927	2.20489	3.24217	4.09401	10.4523	15.0832	28.3779	27.1566	28.6912	29.4039	37.1619	37.7207	37.5498	34.807	29.4297	12.739	1.71763	1.68293	0.133019	0.00412378	0.0206636	39.8247	1.22926	0	1.00779	0.075614	0.912659	13.3281	1.98787e-10	2.0715e-09	yes
ENSG00000140451	PIF1	2.76586	3.84077	3.97551	3.95523	8.36185	18.5321	55.2868	60.2829	45.2405	25.7434	16.3323	13.9959	14.826	12.4069	9.47393	5.22137	3.14496	1.53909	0.418637	0.00772166	30	19.0257	0.883505	1.68384	1	0.0750597	0.912594	13.3227	2.00042e-10	2.08244e-09	yes
ENSG00000168887	C2orf68	0.430246	1.31582	1.3509	1.73475	5.40637	8.73721	17.7362	44.7537	74.9255	59.768	44.5469	37.6638	45.3767	46.7553	40.8073	34.4446	14.9748	8.04066	0.163532	0.00179718	30	49.1573	0	0	1.09202	0.0819721	0.912584	13.3219	2.00235e-10	2.08244e-09	yes
ENSG00000145907	G3BP1	12.9688	12.3758	15.5933	29.4561	35.5018	64.2874	148.447	220.53	187.141	690.032	625.29	770.828	538.68	610.209	603.151	507.347	115.093	29.3362	0.667372	0.00265173	12.1383	720.064	10	0	1.02749	0.0771627	0.912513	13.3159	2.01635e-10	2.09492e-09	yes
ENSG00000164830	OXR1	0.276586	1.77814	1.23511	2.98377	5.11803	5.79415	18.8828	31.6827	34.7837	70.0893	50.6065	83.2359	57.176	70.6037	56.8884	25.0954	4.5239	5.69247	0.132893	0.00359092	30	73.6091	0.382292	0	1.02083	0.0766731	0.91249	13.3141	2.02078e-10	2.09744e-09	yes
ENSG00000273294	C1QTNF3-AMACR	0.0307318	0.0711254	0.0771944	0.6939	0.432509	1.19562	2.04235	4.5261	4.40738	14.4019	13.3735	16.8691	10.1441	8.06209	10.3026	4.75664	2.24986	0.435116	0.0199333	0.00432905	29.9813	14.5822	0.00770668	0	1.00023	0.0751623	0.912412	13.3076	2.03625e-10	2.1114e-09	yes
ENSG00000070785	EIF2B3	0.491709	0.604566	0.69475	0.55512	1.36961	1.79343	5.15962	7.17933	7.04317	144.739	99.414	105.339	99.2659	105.362	97.1358	87.2597	43.6666	21.6084	0.0213107	0.00212506	29.9988	116.643	0.358672	3.36463	0.981738	0.0738085	0.912335	13.3011	2.05162e-10	2.12523e-09	yes
ENSG00000196505	GDAP2	0.215123	0.355627	0.385972	0.55512	1.00919	1.70146	4.80132	7.88165	9.37648	7.92106	5.82282	9.04615	7.56672	6.71036	7.65977	5.60408	2.17728	0.499844	0.0265173	0.00225917	29.9976	8.17614	0.196692	0	1.03237	0.0776206	0.912323	13.3002	2.05397e-10	2.12555e-09	yes
ENSG00000052850	ALX4	0.153659	0.426753	0.810541	0.76329	1.51378	4.92043	11.1434	15.9194	9.63574	18.9025	14.3677	15.6458	16.1029	14.6518	13.2142	3.38979	0.822528	0.136648	0.072459	0.00531059	30	18.7755	0.243246	0	1.00544	0.0756591	0.91219	13.2891	2.08085e-10	2.15125e-09	yes
ENSG00000258677	AC022826.2	0.0307318	0.0355627	0.0385972	0	0.252297	0.321897	0.573291	0.585271	0.561725	6.18082	6.29622	6.45747	4.7292	4.92415	4.59138	3.11642	0.895104	0.320044	0.00228801	0.00347953	30	6.41683	0.073879	0	1.01206	0.0761974	0.912106	13.2821	2.09795e-10	2.16677e-09	yes
ENSG00000140332	TLE3	6.94539	17.0345	33.155	52.1119	71.2559	148.578	231.18	266.767	222.097	707.254	401.846	535.885	406.64	445.201	425.005	118.971	18.773	6.59866	1.54493	0.00577054	25.3587	606.881	8.54989	0	0.951892	0.0716789	0.91208	13.28	2.10325e-10	2.17011e-09	yes
ENSG00000121989	ACVR2A	0.184391	0.177814	0.154389	0.76329	1.1894	3.40291	3.51141	3.51163	3.41356	17.2223	9.34965	12.602	6.33713	11.3449	2.9788	0.300707	0	0.204972	0.042376	0.0120384	30	15.53	0.229854	0	1.00151	0.0754257	0.912058	13.2781	2.10779e-10	2.17264e-09	yes
ENSG00000144034	TPRKB	1.01415	0.746817	2.31583	2.0817	2.70318	5.24232	11.7883	22.3574	33.401	45.006	44.5943	43.1825	40.3164	33.3829	41.3897	35.9208	30.0223	19.0192	0.0682449	0.00133355	30	33.4101	0.718482	10	1.02321	0.077071	0.912034	13.2762	2.11263e-10	2.17549e-09	yes
ENSG00000146350	TBC1D32	0.153659	0.106688	0.501764	0.41634	0.720849	0.873721	1.11075	1.48269	1.68517	30.9641	25.4216	16.3286	10.8535	11.4897	6.51753	3.4718	0.229824	0.186992	0.023027	0.0203326	29.4857	29.5649	0.20931	1.62969	1.00102	0.0754571	0.911912	13.266	2.13789e-10	2.19544e-09	yes
ENSG00000215193	PEX26	2.15123	1.28026	2.35443	4.37157	6.48764	10.3007	31.3877	46.5486	75.0983	46.8662	59.6011	40.1387	43.9816	51.4622	49.9677	34.8273	15.4587	7.0086	0.178193	0.0019511	30	52.291	0.645232	0	1.04844	0.0790325	0.91191	13.2659	2.13818e-10	2.19544e-09	yes
ENSG00000106608	URGCP	0.737564	1.99151	1.54389	2.22048	5.91096	17.6584	30.6711	22.1623	20.4381	36.7249	41.3752	36.1846	29.4156	28.2897	20.3365	2.84305	1.01606	0.172608	0.203963	0.00833765	30	42.5549	1.51591	0.642713	1	0.0753814	0.911909	13.2659	2.13831e-10	2.19544e-09	yes
ENSG00000118961	LDAH	0.553173	2.13376	4.0913	7.28595	7.3887	14.2554	35.8665	65.0822	63.5181	42.0656	43.9789	50.1236	31.8985	38.838	45.3987	26.9816	12.0113	5.5738	0.203431	0.00249276	30	46.4014	2.1796	0	1.00352	0.07569	0.911818	13.2583	2.15735e-10	2.21281e-09	yes
ENSG00000173473	SMARCC1	2.33562	2.27601	4.2071	5.44712	9.83959	12.554	29.3454	34.1018	44.117	88.5718	76.6908	93.8751	65.3812	68.2623	75.4331	62.9844	38.9491	26.4773	0.103116	0.00177637	27.4643	77.4471	4.30656	6.83955	1.00086	0.0755035	0.911787	13.2558	2.16389e-10	2.21735e-09	yes
ENSG00000172977	KAT5	5.22441	13.8695	24.1233	48.2261	70.8234	119.194	283.385	383.899	445.75	398.153	372.684	283.133	418.794	301.556	371.813	279.001	69.0803	19.0516	1.40077	0.00259096	10.0615	399.915	3.99462	0	1.02366	0.0772425	0.911748	13.2525	2.17205e-10	2.22353e-09	yes
ENSG00000204371	EHMT2	3.07318	3.41402	2.93339	2.91438	7.92934	12.508	11.4658	28.5612	39.58	73.2098	62.5835	55.4148	75.2889	59.7657	49.8109	47.6757	24.9661	23.3452	0.0845644	0.00171525	13.5532	67.8403	2.07275	0	0.999672	0.0754632	0.911682	13.2471	2.18589e-10	2.23551e-09	yes
ENSG00000131711	MAP1B	0.0614637	0.177814	0.115792	0.97146	0.901061	0.873721	3.6189	7.10129	7.38884	25.0833	14.8174	22.3309	15.9374	19.4794	14.3341	11.4269	1.86278	1.02486	0.0270401	0.00360192	29.8527	21.8496	0	0.0973371	1.04669	0.0790499	0.911607	13.2409	2.20189e-10	2.24967e-09	yes
ENSG00000177963	RIC8A	0.0921955	0.960193	1.50529	3.74706	7.02828	13.5197	29.5603	68.7108	90.2649	45.006	67.5305	50.1805	63.3713	53.2243	50.3037	39.666	20.5511	9.19138	0.219253	0.00180917	30	58.7538	0	0	1.05911	0.0799963	0.91159	13.2395	2.20554e-10	2.2512e-09	yes
ENSG00000184209	SNRNP35	0.706832	1.92039	2.43162	7.6676	15.5343	28.9707	48.3715	54.5863	45.6726	82.391	94.5617	56.6949	77.9845	59.4278	40.5834	15.4454	1.85069	0.553784	0.520622	0.00808134	29.9645	79.0685	0.00120902	9.9991	0.884104	0.0667966	0.911544	13.2358	2.21534e-10	2.259e-09	yes
ENSG00000143756	FBXO28	0.553173	0.320064	0.578958	1.00616	0.756891	3.21897	11	12.2127	13.2221	33.3644	19.4094	30.609	17.7581	16.8242	15.4987	2.32364	0.399168	0.104284	0.0941729	0.00755442	30	29.7352	0	0	1.02764	0.0776747	0.911474	13.23	2.23042e-10	2.27216e-09	yes
ENSG00000112079	STK38	0.614637	1.06688	1.65968	2.25518	4.36114	10.8985	31.8177	47.9142	41.0059	29.824	38.3691	29.9262	33.1044	25.1277	33.6403	15.5548	5.01984	1.02846	0.184383	0.0035802	29.9561	35.984	0.427794	0.187687	0.999983	0.0756024	0.911435	13.2269	2.23864e-10	2.27831e-09	yes
ENSG00000174173	TRMT10C	0.399514	0.78238	2.08425	3.88584	5.22616	12.6	33.5017	42.0615	35.2158	41.2855	49.778	53.4235	48.8526	50.6657	44.0773	14.6526	1.47571	1.48874	0.179925	0.00412639	28.5909	55.1767	1.15864	0	1.01852	0.0770161	0.911409	13.2247	2.24439e-10	2.2814e-09	yes
ENSG00000038219	BOD1L1	0.276586	0.462315	1.69828	3.67767	5.19011	10.0708	16.0522	30.122	35.7343	17.5823	20.1905	14.6218	9.88403	10.3793	12.0496	5.22137	2.15309	1.63618	0.123148	0.0032608	23.6118	16.0737	0.369706	0	1.04495	0.0790187	0.911401	13.2241	2.24604e-10	2.2814e-09	yes
ENSG00000146834	MEPCE	3.01172	4.83653	12.4283	26.8539	37.4841	92.0626	224.229	226.773	247.677	201.387	216.249	157.027	267.342	152.359	128.469	36.1942	7.64467	3.02783	1.48593	0.00578335	27.4661	232.28	2.47661	0	1.00503	0.0760846	0.911221	13.2093	2.28545e-10	2.31917e-09	yes
ENSG00000070404	FSTL3	3.68782	2.63164	2.93339	6.10632	7.42474	35.2247	35.4007	71.8713	58.6786	246.153	222.687	158.734	232.819	206.283	183.476	111.754	29.6594	11.9459	0.276277	0.00365231	29.9937	229.334	0.00309915	9.99195	0.975782	0.0739132	0.911128	13.2017	2.30598e-10	2.33774e-09	yes
ENSG00000113360	DROSHA	11.7703	14.0828	18.1407	30.15	33.8799	58.5393	134.544	133.715	131.357	166.582	182.448	157.34	170.913	182.942	132.568	125.805	60.2502	31.803	0.452967	0.002639	0	176.076	10	10	0.960138	0.0727623	0.911052	13.1955	2.32284e-10	2.35255e-09	yes
ENSG00000153721	CNKSR3	0.737564	1.67145	1.92986	2.28987	1.47774	4.00072	6.98699	8.07674	9.16044	36.3648	22.4155	26.8255	12.8398	19.6725	14.3341	3.79984	0.205632	0.014384	0.0673855	0.00944096	28.5738	31.0576	0.990914	0.392455	0.999975	0.0757989	0.911014	13.1925	2.33127e-10	2.3588e-09	yes
ENSG00000108854	SMURF2	0.0921955	0.711254	0.617555	1.11024	1.83816	3.49488	9.20849	7.95969	6.04934	46.4462	32.1675	38.9724	19.5316	22.0863	11.4001	5.05734	0.520128	0.032364	0.0921807	0.0125255	27.8711	43.6674	0.0507036	0.992764	1.00006	0.0758261	0.91097	13.1889	2.34115e-10	2.36651e-09	yes
ENSG00000156273	BACH1	0	0.177814	0.463167	1.45719	2.59506	3.127	6.01956	6.63307	5.66046	11.1015	6.8643	6.42902	2.90846	7.09657	1.16464	0.109348	0.096768	0.302064	0.083131	0.0145358	29.9851	10.0022	0.215336	0.0128716	1.00005	0.075832	0.910955	13.1877	2.34451e-10	2.36762e-09	yes
ENSG00000132485	ZRANB2	2.85806	4.37421	4.97904	8.01455	9.55125	15.3591	32.7493	55.2106	49.0861	53.8872	40.7124	50.3512	30.0541	49.1208	40.5386	25.8608	10.4147	3.79018	0.178502	0.00304775	23.7064	50.0686	3.61555	0	1.00157	0.0759822	0.910881	13.1816	2.36132e-10	2.38229e-09	yes
ENSG00000169951	ZNF764	0.122927	0.0711254	0.154389	1.3878	1.51378	2.11532	1.8632	2.57519	1.55555	27.8437	23.5753	17.5234	7.28297	9.31727	1.83655	1.4762	0	0.21576	0.0436396	0.0214431	17.6654	29.012	0.0970231	0.25877	1	0.0758698	0.910866	13.1805	2.36454e-10	2.38324e-09	yes
ENSG00000116922	C1orf109	2.82733	1.42251	2.00705	3.12255	3.09965	5.33429	15.0847	18.8457	14.432	12.7217	7.95312	9.27372	8.93819	6.80692	7.79416	1.58555	0.459648	0.129456	0.0945508	0.00598157	30	11.1517	1.56095	0	1.00412	0.0762193	0.910788	13.1741	2.38236e-10	2.39889e-09	yes
ENSG00000165233	CARD19	1.65952	1.88482	1.46669	2.18579	3.53216	4.64451	11.8958	20.7576	17.8024	26.7636	31.4338	29.7271	30.0304	31.1622	30.8407	23.8105	11.467	5.95498	0.0495485	0.00184858	30	32.3894	1.82925	0	1.01491	0.0770439	0.910776	13.1731	2.38508e-10	2.39932e-09	yes
ENSG00000164221	CCDC112	0.583905	0	0.115792	0.20817	1.94629	1.79343	5.26711	5.30646	5.53083	16.8022	23.954	20.6525	14.0694	17.4276	12.8783	8.00974	0.290304	0.021576	0.0268555	0.00450425	30	21.1878	0.344699	0	1.02124	0.0775434	0.910736	13.1699	2.3943e-10	2.40407e-09	yes
ENSG00000137959	IFI44L	0.430246	0.746817	0.69475	1.28372	2.66714	4.3686	13.544	24.8545	24.6295	62.5883	38.4401	61.1895	47.1501	51.8243	49.8333	35.7841	11.9508	4.73953	0.0814457	0.00256927	29.9179	57.6556	0.201169	0	1.02188	0.077592	0.910735	13.1698	2.39441e-10	2.40407e-09	yes
ENSG00000153936	HS2ST1	0.460977	0.462315	1.27371	1.70006	1.73004	3.08101	8.88602	15.4512	16.1172	16.7422	19.1254	21.0508	17.569	20.469	20.0005	15.5548	7.19712	1.99938	0.0440777	0.00195168	28.7331	20.7823	0.644418	0	1.0279	0.0780614	0.91071	13.1678	2.4002e-10	2.40723e-09	yes
ENSG00000103061	SLC7A6OS	0.33805	0.497878	1.58249	1.94292	3.8205	8.87516	22.215	37.2232	55.0058	76.0901	45.5647	50.8917	51.7847	36.6656	41.2329	27.1456	11.334	4.12821	0.174758	0.00327861	30	58.278	0	0	1.03349	0.078493	0.910695	13.1666	2.40366e-10	2.40723e-09	yes
ENSG00000102978	POLR2C	0.614637	1.38695	2.23864	2.74091	4.68552	8.50728	19.3486	39.3692	47.7034	49.5066	61.8497	60.8197	58.8785	61.7209	60.875	51.995	34.4615	17.2968	0.10411	0.00127386	28.6994	62.4062	1.08458	0	1.02092	0.0775406	0.910691	13.1663	2.40447e-10	2.40723e-09	yes
ENSG00000253293	HOXA10	2.0283	1.99151	3.51235	11.033	14.7774	36.8342	77.6093	82.3281	58.549	184.645	185.904	229.738	186.78	175.628	107.147	18.2064	6.82214	2.29425	0.470946	0.00613676	25.4645	223.751	2.96507	0	1.01734	0.0772759	0.910676	13.165	2.40809e-10	2.40855e-09	yes
ENSG00000165458	INPPL1	12.723	16.0743	15.0915	22.1701	40.9803	77.4392	211.795	264.113	357.646	238.892	226.285	138.053	209.173	148.473	151.829	137.532	60.5284	17.6492	1.13017	0.00278781	29.9996	210.636	1.6289	1.76514	0.980828	0.0745269	0.910623	13.1607	2.42037e-10	2.41852e-09	yes
ENSG00000142864	SERBP1	28.0889	29.8727	34.0813	45.0341	65.6693	125.586	471.281	779.815	884.976	1748.33	1507.02	2174.52	1862.19	1502.28	1779.15	1333.5	631.968	155.469	2.55052	0.00214614	29.6533	1916.93	0.203936	9.97428	1.01902	0.0774377	0.910604	13.1592	2.42472e-10	2.42051e-09	yes
ENSG00000182544	MFSD5	1.65952	2.91614	5.86678	10.5473	18.5258	43.87	116.951	128.369	121.246	321.403	467.104	397.86	474.623	359.994	304.913	82.9951	7.35437	2.4309	0.645035	0.00464115	29.4046	455.889	3.91898	0	1.03139	0.0783827	0.910594	13.1584	2.427e-10	2.42051e-09	yes
ENSG00000137055	PLAA	0.460977	0.462315	1.27371	2.74091	1.87421	3.67882	11.3942	15.7633	12.574	35.7648	33.1853	41.5895	34.2394	31.307	34.4018	21.7603	6.72538	1.2622	0.0486891	0.00288488	29.8049	39.3116	1.07755	0	1.02595	0.0779857	0.91056	13.1557	2.43492e-10	2.4261e-09	yes
ENSG00000165632	TAF3	0.0307318	0.248939	0.385972	0.6939	0.756891	1.47153	3.29643	4.40904	3.80245	11.8816	6.29622	7.79448	5.22577	4.34484	4.14344	0.601414	0.3024	0.186992	0.0437649	0.0119712	30	9.80214	0.0363183	0.280308	1	0.0760273	0.910529	13.1532	2.44208e-10	2.43092e-09	yes
ENSG00000174791	RIN1	0.0921955	0.889068	0.733347	2.18579	3.60424	7.8175	16.7329	32.0729	30.4196	151.58	112.598	79.3956	88.6725	115.283	92.8356	68.2605	16.9102	7.46889	0.119459	0.00328103	29.8368	123.409	0.0164787	0	1.00657	0.076566	0.910445	13.1464	2.46175e-10	2.44816e-09	yes
ENSG00000113645	WWC1	1.62879	3.55627	6.75451	12.5596	19.6792	35.4547	83.6647	114.908	118.351	83.2911	96.7156	83.2075	109.15	86.8727	89.6552	73.8099	24.567	6.03409	0.378425	0.00247162	14.8794	102.039	3.74952	0	1.00885	0.0767484	0.910427	13.1449	2.46603e-10	2.45009e-09	yes
ENSG00000077147	TM9SF3	5.25514	5.19216	5.82818	8.74314	11.7138	21.2452	48.1565	76.8656	95.9253	108.314	133.38	108.98	99.5024	123.466	125.378	95.6795	61.6049	33.6406	0.210547	0.00142376	29.0468	123.721	5.56334	0	1.01419	0.0771609	0.910414	13.1439	2.46916e-10	2.45087e-09	yes
ENSG00000141456	PELP1	1.41366	0.853505	1.92986	2.04701	4.72156	8.82918	18.3095	40.6568	45.2405	272.556	188.271	226.353	189.475	212.487	204.731	192.37	81.5754	37.2761	0.1128	0.00199148	21.7676	232.535	2.63021	5.11147	1.06232	0.0808363	0.910386	13.1416	2.47574e-10	2.45171e-09	yes
ENSG00000241360	PDXP	0.0614637	0.497878	0.308778	1.17963	2.73923	7.35765	9.31598	25.0496	30.2467	33.6045	49.3283	33.5106	34.9961	33.1656	29.1161	8.52914	4.06426	3.56004	0.114644	0.0040363	30	41.2594	0	0	1.03745	0.0789462	0.91038	13.1412	2.47701e-10	2.45171e-09	yes
ENSG00000285304	Z83844.3	0.0307318	0.248939	0.154389	0.589815	1.36961	3.67882	4.65799	12.5248	15.1234	16.8022	24.6641	16.7553	17.498	16.5828	14.558	4.26457	2.03213	1.78002	0.057322	0.00403629	30	20.6297	0	0	1.03745	0.0789464	0.91038	13.1412	2.47704e-10	2.45171e-09	yes
ENSG00000150967	ABCB9	1.10635	1.92039	7.41066	6.34919	8.86644	11.9562	34.9349	45.8853	69.7403	41.2255	35.9074	22.3593	32.8916	28.0725	18.9703	16.2929	6.67699	4.65322	0.196137	0.00275063	30	33.7615	2.38565	0	1.04321	0.0793945	0.910361	13.1396	2.48159e-10	2.45315e-09	yes
ENSG00000170445	HARS	2.98099	5.54778	7.10189	6.73083	7.96538	39.5014	62.5604	142.455	181.869	236.492	191.041	185.816	162.353	210.001	216.288	135.427	101.788	60.197	0.433289	0.00167145	30	202.249	1.13289	9.92757	1.01529	0.0772729	0.910354	13.1391	2.48319e-10	2.45315e-09	yes
ENSG00000093000	NUP50	0.245855	0.284502	1.11932	1.80414	2.70318	5.61021	22.7525	25.0106	20.7838	50.7668	65.2582	66.3384	50.5551	58.245	44.6372	18.9172	2.84256	1.15432	0.116393	0.00431605	30	65.6835	2.01442e-07	0	1.00939	0.0768772	0.910239	13.1298	2.51049e-10	2.47778e-09	yes
ENSG00000149485	FADS1	1.93611	3.05839	3.85972	4.44096	8.93853	24.4182	49.6972	92.4728	145.055	1537.95	1026.57	1195.51	1045.27	1110.57	1192.71	935.636	544.695	300.435	0.328784	0.00175374	27.3727	1274.54	0.184232	8.83841	1.01605	0.0773989	0.91021	13.1274	2.51759e-10	2.48244e-09	yes
ENSG00000065989	PDE4A	1.29074	2.77389	3.01058	6.31449	9.33499	30.1664	42.746	50.9186	36.2529	94.1526	62.5835	56.8371	58.4766	54.1174	51.9162	29.4693	3.9191	1.92386	0.368965	0.00768263	29.9978	70.7642	0.93652	9.989	0.975286	0.0743349	0.910119	13.1202	2.53939e-10	2.50158e-09	yes
ENSG00000064703	DDX20	0.645368	1.70701	2.62461	5.96754	8.39789	16.8766	32.7493	29.5757	20.3949	41.4055	33.28	38.7164	28.2806	30.3656	24.0096	7.92773	2.06842	0.729988	0.206462	0.00738388	15.9971	40.1589	1.17621	2.12959	1	0.0762481	0.910055	13.1151	2.55478e-10	2.51239e-09	yes
ENSG00000141699	RETREG3	0.430246	0.248939	1.08072	1.04085	1.694	3.40291	17.7362	25.2837	38.9319	135.678	96.2422	79.9361	90.6824	103.745	74.6044	53.3072	17.3699	6.68856	0.143948	0.00430665	30	104.358	0	9.93119	1.05286	0.0802804	0.910052	13.1148	2.55565e-10	2.51239e-09	yes
ENSG00000196535	MYO18A	0.307318	0.106688	0.463167	0.90207	2.30672	3.4489	6.55702	10.0667	8.38266	40.3854	34.0848	23.3834	24.1662	19.6966	24.7487	14.6253	6.42298	5.82192	0.0634164	0.00716475	30	28.1222	0.17207	6.73343	1	0.0762535	0.910044	13.1142	2.55758e-10	2.51239e-09	yes
ENSG00000173674	EIF1AX	2.42781	1.95595	2.31583	4.61444	6.59577	11.8642	35.0783	77.0217	95.234	76.6902	95.4611	99.5645	94.915	89.3106	88.3114	82.0657	45.6745	20.5943	0.225771	0.00167213	29.8271	86.9644	1.42718	10	1.05807	0.0807004	0.910005	13.1111	2.56695e-10	2.51923e-09	yes
ENSG00000113658	SMAD5	1.22927	2.41826	3.16497	3.85115	4.79365	17.0605	62.6321	74.6806	67.1909	146.059	100.692	159.303	100.827	117.697	106.005	40.8688	6.90682	3.08537	0.355984	0.00442999	30	143.773	0.0868462	0	1.01504	0.0774237	0.909995	13.1103	2.56944e-10	2.51931e-09	yes
ENSG00000067191	CACNB1	0.122927	0.213376	0.154389	0.41634	0.28834	1.83941	1.50489	2.26305	2.93825	9.60128	8.09514	5.34804	4.46909	5.11726	3.85228	1.58555	0.72576	0.338024	0.0268014	0.0117912	29.7514	8.16147	0.0636675	0.787173	0.999992	0.0763048	0.909932	13.1052	2.58479e-10	2.53198e-09	yes
ENSG00000253719	ATXN7L3B	0.245855	0.39119	1.11932	2.04701	2.1265	7.4956	20.961	21.655	20.0925	27.4837	20.4746	31.2633	20.3829	16.5828	19.1494	4.89332	1.01606	0.715604	0.132091	0.00576785	30	27.9263	0.175178	0.0523456	1	0.0763513	0.909834	13.0974	2.60903e-10	2.55195e-09	yes
ENSG00000166848	TERF2IP	0.33805	0.284502	0.656153	1.24902	3.20778	8.36932	41.2411	44.7147	40.401	263.015	152.174	228.145	153.226	158.249	137.607	49.6167	12.1928	3.47374	0.282004	0.00637043	29.9512	220.667	0.0106982	9.95966	1.04154	0.0795252	0.909829	13.097	2.61031e-10	2.55195e-09	yes
ENSG00000115649	CNPPD1	0.122927	0.106688	0.27018	0.242865	0.14417	0.367882	2.00652	4.40904	5.66046	23.1031	19.9775	23.1843	20.2646	25.707	18.4327	20.202	8.96314	5.50548	0.0133309	0.00165833	30	23.6939	0	0	1.02976	0.0786303	0.90982	13.0962	2.6125e-10	2.55195e-09	yes
ENSG00000136451	VEZF1	0.307318	0.746817	1.11932	1.52658	4.00071	10.1168	24.544	23.4889	21.9937	38.5251	41.5882	55.8699	40.3164	37.9449	19.0374	4.2099	1.14912	1.14712	0.163098	0.00655798	29.8859	49.8508	0.350166	0	1.01123	0.0772266	0.909797	13.0944	2.61828e-10	2.55521e-09	yes
ENSG00000138107	ACTR1A	0.276586	0.497878	0.733347	0.20817	0.720849	3.4489	8.85019	19.6261	28.4751	34.0845	42.0379	36.4975	36.2493	32.4656	41.4568	30.5628	17.8658	12.0322	0.0601664	0.00137823	30	39.2071	0	0	1.03826	0.0793014	0.909775	13.0926	2.62371e-10	2.55812e-09	yes
ENSG00000261732	AL031708.1	0.0307318	0.355627	0.733347	1.07555	2.27067	2.39124	1.79154	1.79483	2.41974	26.5835	7.38504	3.21451	4.04347	3.66898	1.70217	0.710762	0.254016	0.046748	0.157762	0.0908061	30	24.908	0.333178	1.5735	1	0.0764056	0.909717	13.088	2.63806e-10	2.56971e-09	yes
ENSG00000198042	MAK16	0.522441	3.02283	3.43515	6.62675	7.06432	9.93282	23.9707	32.5801	33.2714	61.6882	36.9962	59.4827	34.1685	39.7794	41.636	19.8467	3.04819	1.3521	0.142322	0.00421706	30	53.9828	2.58444	0	1.01342	0.0774436	0.909691	13.086	2.64463e-10	2.57371e-09	yes
ENSG00000140553	UNC45A	0.921955	1.28026	1.69828	2.56743	3.8205	9.47297	16.7688	36.8331	66.0243	57.0076	50.2277	41.874	52.1631	49.4346	37.4926	38.0531	17.9263	20.7273	0.131877	0.00144383	30	51.0369	0	0	1.04097	0.0795967	0.909592	13.0781	2.66943e-10	2.59423e-09	yes
ENSG00000172534	HCFC1	1.75171	3.84077	5.558	9.26357	12.0021	28.8328	56.9708	89.8976	87.7587	88.5718	91.7449	80.1352	83.6359	113.255	84.0559	58.7199	32.4778	16.4409	0.306258	0.00262672	29.8933	91.2782	1.13155	7.80177	0.966518	0.0739058	0.909587	13.0777	2.67067e-10	2.59423e-09	yes
ENSG00000127884	ECHS1	3.41123	4.72984	3.78253	4.40627	7.49683	13.2898	16.5538	31.7217	56.2589	95.1127	104.077	89.5796	108.913	90.1796	79.4646	75.9422	55.0731	52.5915	0.0997435	0.00119721	29.901	89.0119	3.17731	9.98982	1.00064	0.0765488	0.909515	13.072	2.68898e-10	2.60959e-09	yes
ENSG00000108590	MED31	0.737564	1.10244	1.73687	2.70621	3.42403	10.3007	32.8209	50.8796	47.1849	46.7462	48.2868	69.2116	48.3797	54.1657	45.981	16.7302	4.48762	2.50282	0.209349	0.00376878	30	59.3125	0	0	1.02596	0.0785265	0.909428	13.0651	2.71107e-10	2.62858e-09	yes
ENSG00000033050	ABCF2	0.460977	0.711254	0.540361	1.11024	1.694	6.34597	14.9414	35.2333	53.1478	28.7438	29.2088	30.4667	34.9015	29.4966	31.1542	26.5989	19.6681	7.89682	0.103751	0.00112317	30	32.0191	0	0	1.08229	0.0828612	0.909383	13.0615	2.72254e-10	2.63725e-09	yes
ENSG00000147649	MTDH	2.98099	5.79672	6.13696	8.77784	13.1915	21.7051	65.606	116.547	199.931	446.34	305.248	334.138	278.763	304.332	299.112	238.57	87.7202	29.1923	0.532267	0.00271204	29.9843	359.847	0.0594082	9.98166	1.03963	0.0796016	0.909369	13.0604	2.72612e-10	2.63728e-09	yes
ENSG00000186480	INSIG1	1.41366	3.48515	5.558	10.8248	16.94	24.5561	65.5702	71.6372	75.2279	182.724	188.342	261.229	180.23	205.897	122.153	35.2921	20.5874	23.7336	0.424938	0.00531851	29.8207	218.981	1.06406	9.98305	0.981446	0.0751492	0.909364	13.06	2.72762e-10	2.63728e-09	yes
ENSG00000179195	ZNF664	5.65466	4.69428	5.71239	8.04924	10.9569	25.5678	78.8276	166.061	152.616	104.894	118.445	145.307	119.838	129.573	103.205	90.3214	48.9646	35.2552	0.46463	0.00209671	29.8724	120.685	1.76736	10	0.995417	0.0762331	0.909333	13.0576	2.73546e-10	2.64242e-09	yes
ENSG00000106263	EIF3B	3.01172	4.40978	4.24569	8.25741	15.6424	33.9371	41.2053	91.5364	145.357	260.315	227.847	183.881	223.266	248.235	194.137	176.925	115.275	88.9003	0.322982	0.00167697	29.9827	241.562	0.0219743	9.99967	0.921885	0.0706372	0.90925	13.051	2.75696e-10	2.66073e-09	yes
ENSG00000119718	EIF2B2	0.245855	0.746817	0.926333	1.04085	1.694	1.5635	4.76548	6.75013	8.81476	25.5634	29.9662	27.8781	21.8489	32.4415	20.5828	19.4366	12.4468	7.16683	0.020321	0.00177656	30	28.5905	0.669446	0	1.00469	0.0770465	0.909112	13.04	2.79311e-10	2.69313e-09	yes
ENSG00000123178	SPRYD7	1.78245	1.84926	1.54389	2.0817	2.77527	8.18538	19.2769	20.7966	20.3517	63.6685	48.8785	50.6357	51.9503	60.6588	55.119	31.0002	6.27782	1.74766	0.076719	0.00312243	27.438	61.9488	1.81582	0	1.02821	0.0789406	0.908922	13.0251	2.84323e-10	2.73656e-09	yes
ENSG00000105618	PRPF31	2.0283	2.45383	2.43162	3.12255	5.947	13.5197	21.6776	59.0344	67.7959	83.4111	92.597	77.2052	70.2286	79.1968	74.7388	60.9068	43.2795	48.4022	0.147381	0.00122589	30	72.8836	1.33698	10	0.988524	0.075894	0.908922	13.0251	2.84338e-10	2.73656e-09	yes
ENSG00000167987	VPS37C	1.47513	1.28026	1.77547	1.24902	2.73923	3.90875	4.94464	7.80362	7.30242	16.5022	22.4865	15.3898	19.6971	17.7414	18.5447	6.58822	0.713664	0.55738	0.0254356	0.00369376	30	20.8147	1.5327	0	1.02985	0.079085	0.908884	13.0221	2.85343e-10	2.7437e-09	yes
ENSG00000126903	SLC10A3	0.737564	0.569003	0.154389	2.49804	3.31591	12.508	32.6776	51.5039	48.7404	241.232	215.776	181.236	158.144	224.966	209.636	157.024	32.7076	10.5722	0.172617	0.00264436	29.9964	229.565	0.375271	0	1.03057	0.07915	0.908864	13.0205	2.85889e-10	2.74643e-09	yes
ENSG00000161714	PLCD3	1.04488	1.06688	0.810541	1.04085	2.34276	5.88612	7.91859	18.4556	21.0431	28.7438	35.0789	25.3463	27.2638	25.7552	30.5495	18.5618	15.1321	10.1299	0.049006	0.00152904	29.5777	30.2569	0.841325	0.138839	0.999976	0.0768463	0.908764	13.0127	2.88575e-10	2.76969e-09	yes
ENSG00000176105	YES1	0.553173	0.960193	2.08425	2.04701	2.09046	6.07006	28.4854	55.7568	54.3577	75.7901	51.6716	82.3825	67.4384	71.7864	63.0252	47.375	24.6396	5.96936	0.16943	0.00227836	30	75.4663	0	0	1.03196	0.0793718	0.908622	13.0016	2.92422e-10	2.80403e-09	yes
ENSG00000131591	C1orf159	0	0	0.578958	1.45719	1.83816	5.74816	12.3974	24.9326	36.7282	95.7128	55.1748	63.9489	61.6924	69.6381	61.7261	31.8476	12.0839	3.42699	0.116878	0.00341186	30	77.7855	0	0	1.04315	0.0802591	0.908567	12.9973	2.93925e-10	2.81586e-09	yes
ENSG00000144647	POMGNT2	0.245855	0.213376	0.308778	0.6939	1.4417	3.86276	14.1173	20.2894	16.4197	39.1252	34.7476	32.1451	41.4751	35.7725	36.8655	21.1042	1.91117	0.525016	0.0726862	0.00324507	29.7904	41.3675	0.0479178	0	1.03328	0.0795055	0.908555	12.9963	2.94254e-10	2.81643e-09	yes
ENSG00000020129	NCDN	1.47513	0.355627	0.926333	1.63067	2.23463	6.254	10.9642	18.2214	18.8826	86.0515	118.279	97.2318	88.2232	111.445	94.7841	75.6688	29.7683	11.2087	0.0630908	0.0025419	29.8399	99.1441	0.0507356	9.96799	0.992967	0.076412	0.908537	12.9949	2.94759e-10	2.81868e-09	yes
ENSG00000111726	CMAS	0.737564	1.13801	0.849139	1.45719	1.73004	3.95474	11.0717	13.3832	13.2221	51.7869	43.1977	52.1718	49.2546	55.4691	47.2129	38.6819	8.68493	2.31582	0.043252	0.00252518	25.4861	55.3648	0.93781	0	1.03568	0.079709	0.908516	12.9933	2.95345e-10	2.82171e-09	yes
ENSG00000090060	PAPOLA	2.27416	2.31158	4.63167	4.57974	5.29824	11.3584	36.6548	62.2729	65.6354	115.755	107.77	124.769	87.2774	124.89	112.5	86.6583	55.6537	23.6221	0.177619	0.0018987	29.6814	111.763	2.33494	9.02134	1.0231	0.0787817	0.90843	12.9865	2.97734e-10	2.84178e-09	yes
ENSG00000068024	HDAC4	0.122927	0.853505	1.62108	3.05316	3.46008	7.26568	12.0391	14.2806	10.6296	10.6814	8.14248	9.61509	9.64757	7.00002	8.69004	2.40566	0.96768	0.266104	0.0852559	0.00640736	6.93686	10.0582	0.122931	0.905321	1	0.0770107	0.908413	12.9852	2.98197e-10	2.84178e-09	yes
ENSG00000033867	SLC4A7	2.45855	6.54354	7.83523	12.282	18.706	29.5685	97.2804	94.4628	88.6229	462.962	253.955	270.36	205.602	232.618	158.683	86.7403	16.7409	11.4389	0.866402	0.00934668	29.9759	366.753	0.0438965	10	0.971222	0.0747955	0.908411	12.985	2.98262e-10	2.84178e-09	yes
ENSG00000146733	PSPH	1.75171	0.426753	0.231583	0.41634	1.94629	6.94378	11.7166	28.5222	55.8268	70.0293	62.9385	53.4804	58.8076	65.414	38.6348	36.4129	12.9548	4.78987	0.140457	0.00281036	30	65.9225	0	0	1.06957	0.0823818	0.908385	12.983	2.98973e-10	2.84341e-09	yes
ENSG00000108349	CASC3	1.04488	1.42251	2.779	4.47566	5.47845	13.8876	27.1955	32.0338	32.8393	46.1462	65.7316	58.7999	64.5299	54.7933	56.1045	36.6042	9.82195	4.05629	0.114375	0.00274706	4.22791	64.0171	1.04491	0	1.02304	0.078798	0.908385	12.983	2.98977e-10	2.84341e-09	yes
ENSG00000254996	ANKHD1-EIF4EBP3	0	0.426753	1.00353	0.6939	2.95548	3.95474	6.59285	7.02325	7.60489	17.1623	11.7403	11.4926	7.14109	9.80003	9.18277	5.6861	0.991872	0.129456	0.0436503	0.00597186	30	13.3328	0.684995	0.724125	1	0.077066	0.908293	12.9759	3.01539e-10	2.86517e-09	yes
ENSG00000139722	VPS37B	0.33805	0.462315	0.424569	1.52658	1.80212	3.49488	7.59611	9.48139	6.3086	53.5871	46.9849	44.3489	34.1212	52.0657	33.1476	9.6773	0.834624	0.327236	0.0435148	0.00532448	29.9631	53.735	0.621037	0	1.01911	0.0785648	0.908238	12.9716	3.03089e-10	2.87728e-09	yes
ENSG00000100804	PSMB5	20.0064	17.7102	21.7302	34.7297	35.8262	87.8779	254.721	445.586	565.571	1018.58	1203.57	995.844	1221.98	1197.92	1082.47	956.194	622.472	402.896	1.21514	0.0014202	3.41928	1243.38	9.90678	4.59231	0.967931	0.074659	0.908149	12.9647	3.0561e-10	2.89858e-09	yes
ENSG00000117222	RBBP5	0.614637	0.497878	1.46669	2.22048	5.40637	10.1168	24.1499	33.8677	47.7034	578.717	295.26	403.208	341.164	333.491	316.38	134.279	13.862	3.84053	0.219634	0.00539498	29.9993	455.94	0.0562379	9.98807	1.02839	0.0793308	0.908132	12.9634	3.06092e-10	2.90052e-09	yes
ENSG00000196912	ANKRD36B	0	0	0.0771944	0	0	0.597809	1.43323	1.91189	1.8148	13.9819	8.14248	10.2125	6.19525	7.57933	3.38195	1.72223	0.48384	0	0.0186277	0.0115262	30	12.0965	0	0.418053	1.04409	0.0805705	0.908073	12.9587	3.07794e-10	2.914e-09	yes
ENSG00000124795	DEK	1.32147	1.5292	1.65968	3.4695	2.77527	6.94378	20.5668	40.1106	37.7652	92.0523	70.868	96.4069	62.922	79.6554	81.3235	59.1846	23.0671	5.65291	0.121252	0.00240323	29.7351	89.1928	0.751322	0	1.02589	0.0791752	0.908053	12.9572	3.0835e-10	2.91663e-09	yes
ENSG00000166974	MAPRE2	2.91952	3.37846	7.71944	5.5512	4.68552	11.4963	17.9154	36.677	49.0429	40.8054	48.2868	40.537	30.858	39.5863	43.8981	22.6897	16.8739	6.4728	0.115313	0.00201045	24.9071	43.4828	2.77161	0	1.03194	0.0796586	0.908018	12.9545	3.09368e-10	2.92362e-09	yes
ENSG00000101343	CRNKL1	0.614637	1.20913	1.65968	3.4695	4.86573	7.08174	16.8404	25.2447	21.432	77.7104	55.3168	64.4325	80.491	84.1692	54.6263	25.5054	9.3623	0.478268	0.0952574	0.00370348	19.1587	79.3581	0.911876	0	1.02414	0.079095	0.907937	12.9482	3.11712e-10	2.9431e-09	yes
ENSG00000215301	DDX3X	10.1722	12.1269	26.6321	66.1287	94.8998	135.979	426.708	495.686	388.541	2116.96	1790.97	2227.74	1860.14	1957.21	1644.45	1047.61	271.483	122.325	1.90569	0.00333731	29.9693	2196.87	0.0193322	9.93703	0.961495	0.0742982	0.907844	12.941	3.14399e-10	2.96517e-09	yes
ENSG00000122692	SMU1	0.614637	0.817942	0.733347	0.451035	0.937104	1.28759	3.86972	6.55504	8.51229	21.2428	19.0543	17.9216	13.5965	16.8725	18.0744	16.2382	8.21318	3.67152	0.0194595	0.0016906	30	19.4118	0.4222	0	1.01981	0.078808	0.907837	12.9404	3.14617e-10	2.96517e-09	yes
ENSG00000164683	HEY1	0.399514	0.39119	2.58601	6.38388	9.80355	11.4044	16.1238	25.4008	18.7098	46.8662	38.1087	46.4255	30.0541	43.6898	14.0877	6.17816	0.979776	0.812696	0.146608	0.00742316	28.1403	49.0015	2.25312	0	1.00506	0.0776814	0.907809	12.9383	3.15433e-10	2.97019e-09	yes
ENSG00000163807	KIAA1143	0.368782	0.78238	2.16144	4.02462	4.28905	11.5423	31.746	56.2641	61.6169	14.762	13.9416	21.1361	18.9877	14.9897	15.5659	7.95507	1.31846	0.956536	0.202194	0.00271297	29.6886	18.016	0	0	1.06357	0.0822284	0.907758	12.9343	3.16931e-10	2.98161e-09	yes
ENSG00000162959	MEMO1	0.184391	1.10244	2.23864	2.1164	2.30672	5.24232	7.45279	8.11576	6.43823	18.9625	12.0007	7.25399	6.54994	5.3345	1.67978	3.38979	0.774144	2.61429	0.178249	0.0297631	27.5922	16.3484	0.565805	1.95097	1.00001	0.077331	0.907721	12.9315	3.17994e-10	2.98892e-09	yes
ENSG00000142252	GEMIN7	0.491709	0.0711254	1.00353	2.91438	3.8205	15.543	19.0978	31.2535	44.2034	40.4454	24.3564	21.3352	28.6826	25.9484	22.5538	5.2487	2.27405	1.67933	0.177258	0.00439232	30	32.0618	1.24897e-05	0	1.0306	0.0797334	0.907645	12.9256	3.20263e-10	3.00754e-09	yes
ENSG00000075790	BCAP29	0.737564	0.248939	0.887736	1.52658	1.51378	3.54087	9.78178	17.9873	17.5431	66.1288	57.6838	85.2841	58.784	63.3381	65.0185	47.9764	13.5354	8.07662	0.0559537	0.00242652	30	72.8937	0.392876	0	1.02428	0.0792499	0.907633	12.9247	3.20618e-10	3.00817e-09	yes
ENSG00000113272	THG1L	1.81318	2.91614	4.24569	8.46558	10.2361	14.0715	46.0066	54.2741	55.3083	82.391	57.4471	79.7369	92.0539	61.8657	57.4931	44.8053	13.7652	4.0455	0.207531	0.0031474	13.3004	82.1604	1.81425	0	1.01115	0.0782475	0.907603	12.9224	3.21499e-10	3.01373e-09	yes
ENSG00000115241	PPM1G	5.19368	5.79672	7.14048	8.3615	9.26291	23.4525	28.9512	47.1729	55.5676	35.5847	40.0023	26.3135	34.5705	31.8622	30.9527	29.3873	14.6362	5.77158	0.148907	0.00246404	29.0577	30.2276	6.41029	6.22216	1.03446	0.0801293	0.907441	12.9099	3.26359e-10	3.05655e-09	yes
ENSG00000031698	SARS	1.50586	0.817942	1.54389	1.24902	1.1894	5.42626	13.544	32.385	69.7835	51.8469	58.6543	45.2307	53.7474	53.1277	44.7044	39.3106	23.8291	22.3384	0.122696	0.00120631	30	51.1893	0	1.62881	1.09906	0.0851765	0.907355	12.9033	3.2895e-10	3.07805e-09	yes
ENSG00000122687	MRM2	0.860491	0.497878	1.3895	3.60828	6.99224	15.543	32.6776	38.862	46.3639	112.035	51.2929	82.3825	61.1958	48.6139	54.9174	17.4957	2.58854	1.30894	0.280012	0.0064506	30	88.3889	0	0	1.00077	0.0775706	0.907331	12.9015	3.29688e-10	3.0822e-09	yes
ENSG00000116017	ARID3A	0.399514	2.02707	5.01764	6.69614	13.9845	21.3832	18.0228	23.4889	17.6295	33.0644	25.0902	27.2522	12.7452	21.869	9.02599	1.72223	0.701568	0.122264	0.269053	0.0127561	5.85705	32.1833	0.398977	1.02646	1.00002	0.0775229	0.907306	12.8996	3.30425e-10	3.08616e-09	yes
ENSG00000196821	C6orf106	1.04488	2.34714	2.47022	3.81645	4.46926	15.773	59.9089	106.402	121.333	74.4699	78.6791	75.2708	102.742	80.0416	77.404	54.9474	15.9788	6.36132	0.403707	0.00287705	29.7671	78.3321	0.129628	9.75551	1.07361	0.0832328	0.907297	12.8989	3.30702e-10	3.08616e-09	yes
ENSG00000175213	ZNF408	0.460977	0.889068	2.54742	6.07163	10.7046	15.8189	16.5538	17.9093	29.7714	122.116	65.0688	52.627	48.8053	31.0656	8.26449	4.56528	1.31846	1.20826	0.493266	0.0251465	29.6899	111.448	0.841005	3.15987	1.00049	0.0776061	0.907206	12.8919	3.33502e-10	3.10774e-09	yes
ENSG00000182670	TTC3	1.38293	1.92039	3.82112	6.73083	9.19082	15.589	29.417	36.599	34.6973	16.9223	21.6817	17.3811	15.8665	18.7552	17.4473	10.7708	7.39066	6.63462	0.201732	0.00558434	18.8663	12.8271	1.65226	7.46611	1.00001	0.0775707	0.907202	12.8916	3.33616e-10	3.10774e-09	yes
ENSG00000169718	DUS1L	2.05903	2.27601	5.05623	6.90431	11.6057	31.27	69.4757	153.419	235.19	85.5114	102.751	70.6623	85.5039	96.1417	82.7569	69.682	46.11	25.1504	0.458384	0.00111271	30	89.7142	0	0	1.1082	0.0859733	0.907181	12.89	3.3425e-10	3.10774e-09	yes
ENSG00000111725	PRKAB1	0.368782	1.20913	2.54742	6.2451	9.44312	12.2321	18.7395	17.5191	16.4197	32.7044	35.1263	27.2238	33.1517	23.8966	24.8383	9.07588	4.28198	1.7045	0.0946309	0.00618163	15	31.2762	3.85674	4.57445	1.08424	0.0841185	0.907173	12.8894	3.34496e-10	3.10774e-09	yes
ENSG00000186815	TPCN1	1.93611	3.27177	2.20004	2.74091	5.2622	11.0365	16.6254	21.2258	28.1295	150.14	124.41	100.02	92.716	100.462	115.076	81.5736	42.2513	32.702	0.0729356	0.00234234	29.9779	115.267	2.88637	9.97699	0.999371	0.0775343	0.907173	12.8894	3.34502e-10	3.10774e-09	yes
ENSG00000234545	FAM133B	0.307318	1.13801	3.24217	3.26133	6.34347	7.21969	9.88928	13.8904	8.77155	16.6222	15.2198	14.0813	15.8192	14.1931	6.78629	5.93213	0.495936	0.266104	0.0683544	0.00619658	0	17.2178	1.04529	0.461937	0.999998	0.0776076	0.90712	12.8853	3.3615e-10	3.11844e-09	yes
ENSG00000198663	C6orf89	2.05903	2.0982	2.47022	4.82261	5.11803	12.8299	34.3617	53.8059	62.6971	416.336	234.901	329.246	261.146	271.673	287.981	209.101	84.5752	37.7041	0.202907	0.00269751	29.9901	326.947	0.0137972	9.99212	0.998538	0.0774957	0.907117	12.8851	3.3625e-10	3.11844e-09	yes
ENSG00000235106	BRD3OS	0.307318	0.497878	0	0.20817	0.504594	2.06934	5.0163	10.0667	10.6728	51.3668	57.2814	43.8653	47.8359	61.1657	46.8097	45.7075	13.4266	5.60257	0.0312302	0.00214641	30	56.7821	3.30867e-06	0	1.03167	0.0800774	0.907094	12.8834	3.36935e-10	3.12145e-09	yes
ENSG00000273559	CWC25	19.5454	15.2564	16.1722	20.5394	28.2573	26.3496	40.5245	50.8796	57.9873	124.397	82.561	79.0258	72.1676	77.5554	36.7311	4.42859	3.65299	0.967324	0.369886	0.00921704	9.28532	112.089	10	0	0.953914	0.0740456	0.907087	12.8828	3.37172e-10	3.12145e-09	yes
ENSG00000188986	NELFB	2.76586	2.73833	2.7018	6.10632	7.31662	18.9	26.6939	62.3119	85.0365	88.7518	90.4667	69.9227	81.1531	101.524	87.6171	70.2014	41.4167	18.016	0.189459	0.00158452	29.4323	92.4273	1.69543	0	1.03111	0.080066	0.907027	12.8782	3.39027e-10	3.13585e-09	yes
ENSG00000112378	PERP	3.25757	2.80945	3.47375	4.33688	6.27139	7.86349	23.5408	43.154	51.7219	90.6721	93.2361	100.105	76.1638	101.669	78.5463	75.8055	53.3313	48.2296	0.101056	0.00105257	27.9239	92.2233	3.67841	2.05511	1.01321	0.0787031	0.906969	12.8738	3.40851e-10	3.14993e-09	yes
ENSG00000104312	RIPK2	0.399514	0.355627	0.656153	1.45719	1.29753	2.11532	5.91207	11.1982	9.41969	9.12122	8.40285	12.6305	8.37068	8.9552	6.78629	2.26897	0.774144	0.492652	0.0452434	0.00427005	29.8925	10.5752	0.23578	0	1.02278	0.0794627	0.906934	12.8711	3.41936e-10	3.15717e-09	yes
ENSG00000158882	TOMM40L	1.47513	2.52495	2.62461	5.89815	6.30743	25.3379	74.0262	128.135	117.833	118.336	129.096	140.301	140.646	134.376	131.918	74.302	20.8777	3.3299	0.426567	0.0027256	29.974	119.91	0.0173568	9.99777	1.10726	0.0860339	0.906919	12.87	3.42407e-10	3.15872e-09	yes
ENSG00000198373	WWP2	0.276586	0.320064	1.77547	0.97146	2.59506	9.33502	12.1466	20.0553	17.0246	59.648	54.4883	55.6423	66.4453	38.2587	51.2219	30.098	14.4063	5.65651	0.063754	0.00286947	29.8313	60.9439	1.25645	0	1.00736	0.0782813	0.906899	12.8684	3.43051e-10	3.15977e-09	yes
ENSG00000143373	ZNF687	2.95026	5.15659	14.9757	25.8131	45.5577	99.0523	177.935	174.879	215.4	53.9472	48.2868	59.5396	55.7573	32.2966	38.926	5.95947	1.30637	1.58224	1.70494	0.00878949	30	51.8563	0.174073	9.99995	1.04387	0.0811195	0.906896	12.8683	3.43124e-10	3.15977e-09	yes
ENSG00000104218	CSPP1	0.891223	0.817942	1.27371	2.18579	2.77527	5.15035	14.9414	19.5481	23.8085	83.7112	52.1213	58.6862	34.9961	51.4381	26.2717	15.4181	3.27802	1.47796	0.176052	0.00909103	30	69.2251	0	2.99146	1.00953	0.0785152	0.906759	12.8578	3.47473e-10	3.19286e-09	yes
ENSG00000004864	SLC25A13	1.29074	0.92463	2.27724	2.74091	4.36114	3.67882	9.17266	14.1245	16.5061	48.6665	52.3817	64.4893	51.3828	56.2657	51.9162	44.2859	29.5626	13.2333	0.0399716	0.00197107	30	48.0725	1.79454	10	1.03046	0.0801441	0.906757	12.8576	3.47546e-10	3.19286e-09	yes
ENSG00000166847	DCTN5	0.215123	0.853505	1.3509	2.32457	3.09965	7.35765	16.3388	39.7594	48.9565	71.5295	57.6838	45.06	63.1348	50.1829	63.3611	41.1695	15.5434	6.293	0.134596	0.00228763	30	64.0541	0	0	1.04422	0.0812155	0.906754	12.8574	3.47634e-10	3.19286e-09	yes
ENSG00000169221	TBC1D10B	0.0921955	0	0.115792	0.27756	0.180212	1.05766	2.07818	3.27752	2.85183	45.4261	22.9362	33.9373	28.3988	27.3242	26.7868	17.3317	1.8265	0.471076	0.0137109	0.00393602	30	36.3943	1.01462e-05	0	1.00842	0.0784363	0.906742	12.8565	3.48015e-10	3.19355e-09	yes
ENSG00000043093	DCUN1D1	0.276586	0.106688	0.308778	1.04085	1.40566	3.35693	9.49514	21.3039	17.4567	23.1631	22.3681	30.2107	16.4813	20.5414	16.9993	10.224	1.68134	1.67214	0.0784623	0.00377654	30	25.2118	0	0	1.03425	0.0804604	0.90671	12.8541	3.49035e-10	3.2001e-09	yes
ENSG00000125834	STK35	0.430246	0.569003	1.15792	1.11024	1.73004	5.56422	16.0522	11.1982	9.98142	19.9227	13.3499	11.6348	11.2082	7.96554	5.98	0.738099	0.048384	0.291276	0.139889	0.0117333	30	17.8688	0	0.0925435	1.00146	0.0779221	0.906683	12.852	3.49903e-10	3.20525e-09	yes
ENSG00000141380	SS18	1.16781	1.28026	0.733347	2.7756	2.48693	5.84013	16.4821	24.8935	18.4073	58.0277	54.3463	67.2772	56.5376	66.1864	49.4974	36.6589	7.06406	2.27267	0.0778937	0.00304413	30	66.0105	1.16748	0	1.02895	0.0801531	0.906488	12.8373	3.56197e-10	3.26005e-09	yes
ENSG00000151651	ADAM8	0.0614637	0.355627	0.849139	2.15109	2.23463	4.32262	12.9707	12.0956	9.76537	6.48086	3.97656	4.03947	3.78336	4.00691	1.88135	1.96826	0.072576	0.158224	0.101902	0.00889341	29.9634	5.21609	0.222007	0.393814	0.999999	0.0779528	0.906369	12.8283	3.60088e-10	3.29277e-09	yes
ENSG00000078304	PPP2R5C	11.5552	8.1083	16.3266	24.5641	13.624	28.6488	58.2966	114.596	116.623	121.096	115.486	142.775	102.222	122.597	125.49	100.327	52.9805	28.8291	0.290458	0.00184197	1.86119e-07	120.63	6.94734	10	1.04076	0.0811401	0.906349	12.8267	3.60744e-10	3.29378e-09	yes
ENSG00000204392	LSM2	1.19854	1.56476	1.4281	1.83884	2.3788	9.84085	30.3128	57.3956	76.481	73.2098	86.6559	50.8632	62.2599	61.8657	60.8974	53.9359	29.5021	10.5686	0.189547	0.00186652	30	72.1559	0	0	1.04001	0.0810822	0.906347	12.8266	3.60828e-10	3.29378e-09	yes
ENSG00000112078	KCTD20	1.07561	1.84926	3.47375	2.94908	6.59577	15.3131	27.733	32.8532	31.4134	998.713	468.453	635.904	496.519	584.912	502.342	189.637	17.1642	4.64603	0.200122	0.00575883	29.9424	769.393	0.322812	1.98488	0.971274	0.0757309	0.90633	12.8253	3.6136e-10	3.29576e-09	yes
ENSG00000107021	TBC1D13	0.430246	0.426753	0.926333	1.87353	2.16255	6.80582	23.8633	31.2145	23.3332	78.6105	111.154	68.9555	70.607	71.6416	58.8593	37.233	4.40294	1.51032	0.134377	0.00432382	30	91.7585	1.77334e-06	0	1.0109	0.0788302	0.906309	12.8237	3.62074e-10	3.29939e-09	yes
ENSG00000132716	DCAF8	1.90537	5.22772	6.32994	11.2759	17.9491	44.6057	108.101	126.692	119.172	107.894	106.302	99.9628	107.755	85.0623	98.9947	84.0613	20.285	7.10929	0.482927	0.00330326	28.2198	110.497	7.33164	6.22861	0.98943	0.0771929	0.906228	12.8176	3.64737e-10	3.31944e-09	yes
ENSG00000113761	ZNF346	1.10635	1.88482	2.54742	4.47566	9.98376	28.3729	95.4888	95.6723	130.363	94.8126	151.961	92.1967	116.622	86.9934	85.7581	31.3829	3.58042	0.568168	0.57656	0.00452821	30	124.124	0	0	1.03654	0.0808704	0.906223	12.8172	3.6491e-10	3.31944e-09	yes
ENSG00000197323	TRIM33	1.07561	7.71711	10.6528	11.6575	22.3103	42.0765	61.4138	55.7178	56.7774	36.2448	22.9362	31.0072	25.585	27.0828	22.5986	9.4586	1.72973	1.30175	0.543491	0.00967918	20.8383	30.607	4.39631	5.34979	0.999997	0.0780329	0.906194	12.8151	3.6587e-10	3.32528e-09	yes
ENSG00000155189	AGPAT5	0.768296	1.84926	1.11932	2.67152	4.25301	6.5759	18.3095	23.5279	20.1789	157.581	88.7388	134.184	107.353	96.383	104.236	47.1017	14.4184	5.09553	0.115702	0.0047476	29.9729	126.123	0.0125391	9.81326	0.983487	0.0767909	0.906092	12.8073	3.69304e-10	3.35358e-09	yes
ENSG00000164970	FAM219A	1.93611	0.746817	1.62108	5.06547	12.0742	21.981	65.1044	56.4592	38.6726	113.715	73.306	92.2252	58.5239	55.1071	37.6718	10.7981	0.931392	2.41651	0.548522	0.0104489	30	103.076	0	2.23637	1.00303	0.0783241	0.906076	12.8061	3.69839e-10	3.35552e-09	yes
ENSG00000205138	SDHAF1	0	0.0711254	0.385972	0.589815	0.648764	2.94306	4.72965	4.17493	4.45059	8.40112	8.11881	8.87546	10.1205	8.32761	5.66644	1.01147	0.435456	0.230144	0.0266402	0.00552273	30	10.046	0.281609	0	1.01018	0.0789035	0.90603	12.8027	3.71386e-10	3.36663e-09	yes
ENSG00000102910	LONP2	0.399514	1.92039	2.27724	2.35926	3.42403	6.11604	10.6776	14.5147	18.7098	138.799	96.1002	76.1242	69.401	73.3554	65.8024	54.92	14.5031	8.19169	0.0802267	0.0049296	25.2887	101.778	0.996761	5.84302	0.987089	0.0771097	0.906009	12.8011	3.72097e-10	3.36972e-09	yes
ENSG00000213516	RBMXL1	0.184391	1.70701	2.39303	4.09401	5.91096	8.64524	21.7851	27.7809	25.4937	120.976	62.9622	111	68.0059	77.7726	61.2334	22.0336	11.0074	6.69575	0.160767	0.0060865	28.6426	100.125	1.06227	4.77997	0.999999	0.0781219	0.906001	12.8005	3.72371e-10	3.36972e-09	yes
ENSG00000133997	MED6	0.614637	0.711254	1.85267	1.87353	2.84735	9.88684	17.3421	20.0553	17.7159	89.0519	43.1031	59.824	35.5163	38.2105	33.9762	13.6138	3.85862	0.82708	0.208725	0.0114381	30	68.0504	1.11982e-08	5.27513	0.999893	0.0781386	0.905946	12.7964	3.74218e-10	3.3835e-09	yes
ENSG00000129250	KIF1C	1.29074	1.24469	1.62108	1.56128	2.55901	14.3014	37.2281	73.354	108.629	101.233	62.5361	72.6536	69.0463	65.1002	72.2975	54.2366	26.5991	17.1745	0.254615	0.00182788	30	79.5707	0	0	1.05869	0.0827429	0.905928	12.795	3.74861e-10	3.38639e-09	yes
ENSG00000139645	ANKRD52	0.368782	0.142251	0.463167	0.27756	1.1894	3.26496	4.83715	7.99871	12.6172	9.36125	14.2257	12.3744	13.5965	12.1897	11.9824	6.53354	1.72973	0.672452	0.0355424	0.00273214	29.6056	13.4615	0.088422	0	1.04396	0.0816013	0.905907	12.7934	3.75579e-10	3.38994e-09	yes
ENSG00000165406	MARCH8	0.460977	0.284502	0.463167	1.04085	1.36961	1.93138	5.66125	8.34987	9.63574	7.80104	10.0361	9.21683	9.22194	10.0414	10.3698	6.61555	1.5241	0.03596	0.0290058	0.00253508	29.9933	10.347	0.404135	0	1.04184	0.0814435	0.90589	12.7922	3.76152e-10	3.39218e-09	yes
ENSG00000179922	ZNF784	0.0921955	0.320064	0.810541	1.94292	4.18092	8.59925	9.71012	8.46692	7.73452	12.0016	9.30231	8.47721	10.7116	9.43796	2.50846	0.437392	0.024192	0.01798	0.0966515	0.0104078	13.1062	12.6042	0.0922017	0.1026	1	0.0782182	0.905791	12.7848	3.79534e-10	3.41973e-09	yes
ENSG00000144036	EXOC6B	0.0921955	0.497878	0.501764	1.4225	1.40566	2.62116	5.80458	7.95969	8.29624	8.10108	8.71056	10.7814	8.39433	10.4518	6.22637	5.9868	3.3385	2.2511	0.0295931	0.00315386	29.9963	8.11941	0.558378	1.69247	1	0.0782346	0.905755	12.7821	3.8077e-10	3.42791e-09	yes
ENSG00000161940	BCL6B	0	0	0.154389	0.41634	0.792934	2.43722	3.6189	7.84263	7.69131	22.623	17.7052	11.7486	16.8123	10.6449	6.47273	0.683425	0.18144	0.402752	0.0646182	0.0101645	30	21.1253	0	0	1.03792	0.0812156	0.905726	12.7799	3.81787e-10	3.43412e-09	yes
ENSG00000168461	RAB31	11.5552	13.9761	19.9548	22.8293	34.2403	66.3568	133.541	165.007	194.227	583.158	708.869	679.286	741.373	679.436	653.836	528.124	281.184	102.802	0.558329	0.00191188	29.4887	720.023	0.103733	9.88133	0.927146	0.0725655	0.905683	12.7767	3.83269e-10	3.44448e-09	yes
ENSG00000155229	MMS19	20.7133	25.8897	34.8533	41.0442	67.8679	134.231	239.349	283.154	454.911	650.667	574.66	432.537	565.423	505.039	359.808	343.872	212.103	199.916	1.1473	0.00207905	29.9536	558.074	10	9.84283	0.932699	0.0730092	0.905662	12.7751	3.8401e-10	3.44817e-09	yes
ENSG00000251201	TMED7-TICAM2	0.245855	0	0	0	0.28834	1.10365	1.32574	1.24858	1.3395	6.7209	3.64518	3.755	1.30053	1.23104	0.067191	0.328044	0	0.345216	0.0345001	0.0292292	30	6.43859	0	0.120097	1.02222	0.0800531	0.905584	12.7692	3.86738e-10	3.46969e-09	yes
ENSG00000127054	INTS11	2.15123	2.98727	1.19651	4.99608	16.5795	15.2671	45.4692	62.8581	79.8514	112.335	146.565	137.57	171.977	133.725	112.075	93.2465	53.3434	33.2414	0.212936	0.00214779	29.7861	138.727	3.5123	8.55774	1.01341	0.0793944	0.905517	12.7643	3.89081e-10	3.48771e-09	yes
ENSG00000174501	ANKRD36C	0.491709	0.426753	0.849139	3.05316	3.85654	5.24232	12.3974	20.4845	14.7777	16.0221	13.0185	11.8055	5.67504	7.14485	6.11438	2.32364	0.919296	0.266104	0.121643	0.00738535	30	13.653	0.372821	0	1.00783	0.0789936	0.905439	12.7584	3.91843e-10	3.50947e-09	yes
ENSG00000164077	MON1A	0.153659	0.355627	0.771944	1.21433	4.14488	9.65691	39.4138	67.8915	122.067	207.328	163.323	123.744	161.739	153.518	100.451	77.5004	14.5757	3.88368	0.389481	0.00394255	30	180.184	0	0	1.06729	0.0836663	0.905413	12.7565	3.92738e-10	3.51446e-09	yes
ENSG00000136935	GOLGA1	0.122927	0.0711254	0.617555	2.0817	1.58587	2.02335	4.69382	5.6186	4.83948	19.4426	18.2259	15.1907	15.5591	11.2242	15.8123	5.52207	1.4999	0.5394	0.0229831	0.0043713	29.9999	18.7948	0.698179	0	1.00907	0.0791189	0.905377	12.7538	3.94032e-10	3.52303e-09	yes
ENSG00000111206	FOXM1	1.84391	2.41826	3.55094	3.74706	4.61343	21.7051	46.4008	113.933	147.95	336.285	287.733	212.215	284.603	264.939	297.074	220.118	91.9417	74.84	0.360527	0.00184688	29.843	302.942	0.252514	0.149705	1.0306	0.080907	0.905166	12.7381	4.01615e-10	3.5857e-09	yes
ENSG00000122644	ARL4A	0.399514	0.497878	3.39655	7.39004	14.9216	19.6817	33.0359	38.3158	26.6171	69.7293	84.6202	75.157	80.7038	66.1864	25.4206	3.96387	3.78605	1.63258	0.240783	0.00750274	28.7333	89.2115	3.29591	0	1.01015	0.0793029	0.905163	12.7379	4.01727e-10	3.5857e-09	yes
ENSG00000196943	NOP9	0.614637	0.426753	0.810541	0.589815	1.4417	4.41459	13.759	27.5077	36.9874	26.7636	36.3098	31.7753	34.1921	27.4932	32.3861	27.7197	11.1404	7.23515	0.0866541	0.00165662	30	33.8137	0	0	1.04848	0.0823216	0.905142	12.7364	4.02465e-10	3.58922e-09	yes
ENSG00000240682	ISY1	0.921955	0.746817	1.81407	2.04701	3.09965	9.24304	19.4919	35.5845	43.7281	521.71	294.573	314.396	287.488	280.797	263.254	195.159	52.17	16.5596	0.17571	0.00423311	29.9869	384.279	0.00776247	9.99963	1.01205	0.0794726	0.905118	12.7346	4.03336e-10	3.59181e-09	yes
ENSG00000123240	OPTN	1.3522	1.45807	0.887736	1.63067	1.22544	4.55254	10.0326	14.5928	17.3703	208.048	131.44	134.071	106.643	128.607	111.559	85.1274	44.8036	25.7006	0.0643388	0.00338347	29.9594	148.541	0.00152638	9.9992	0.954705	0.0749706	0.905115	12.7344	4.03443e-10	3.59181e-09	yes
ENSG00000175938	ORAI3	0.0307318	0	0.385972	0.76329	1.11732	2.57518	4.94464	7.10129	6.56786	7.68102	6.01218	7.25399	6.95192	4.51381	7.03266	4.2099	1.57248	0.348812	0.0256723	0.00317766	30	7.28142	0.345517	0.19028	1	0.0785495	0.905067	12.7308	4.05187e-10	3.60364e-09	yes
ENSG00000124208	TMEM189-UBE2V1	2.33562	1.92039	1.89126	4.02462	4.64948	10.2547	23.1825	41.5933	56.6478	44.5859	52.9971	53.7933	50.5788	54.5277	57.4483	37.8891	25.4621	12.4781	0.142962	0.00198934	28.4555	45.1805	0.452129	9.92669	1.03915	0.0816281	0.90506	12.7303	4.05461e-10	3.60364e-09	yes
ENSG00000114784	EIF1B	0.522441	0.39119	1.69828	1.56128	2.27067	5.74816	10.785	17.5581	13.4382	18.7225	18.865	22.018	20.9267	17.5483	18.2983	14.6253	2.05632	0.463884	0.0546488	0.00295085	12.7879	21.9786	0.522414	0	1.02472	0.0805741	0.904891	12.7178	4.11665e-10	3.65567e-09	yes
ENSG00000055130	CUL1	1.16781	1.88482	3.55094	2.49804	3.92863	10.8525	24.7949	38.745	28.6912	44.2859	38.3927	38.7448	42.3973	33.2139	42.1288	24.576	7.98336	3.73984	0.116944	0.00293347	30	44.7887	2.18209	0	1.00034	0.0786696	0.904863	12.7158	4.12689e-10	3.66165e-09	yes
ENSG00000282988	AL031777.3	0.184391	0.853505	1.11932	0.936765	1.98233	2.34525	2.7948	2.53618	3.41356	2.2803	1.94094	2.13353	1.93897	1.2069	0.358352	0.683425	0.447552	0.201376	0.0326275	0.0119364	0	2.10686	0.249491	0.328803	1	0.0786671	0.90481	12.7118	4.14674e-10	3.67615e-09	yes
ENSG00000205659	LIN52	0.0921955	0.284502	0.231583	0.451035	1.91025	2.62116	4.22802	4.33101	6.04934	150.32	79.8863	58.231	59.1859	52.2829	23.0689	3.06174	0.266112	0.542996	0.101144	0.0229995	29.9841	132.002	0	5.1289	1.00913	0.0793897	0.9048	12.7111	4.15049e-10	3.67635e-09	yes
ENSG00000172375	C2CD2L	0.245855	0	0.308778	1.3878	2.66714	4.41459	14.2965	13.3442	9.85179	13.9219	17.1844	11.2081	14.6132	11.7793	5.9576	2.29631	0.350784	0.248124	0.0983391	0.00767196	30	16.5035	0.0746501	0.162717	1	0.0786819	0.904777	12.7094	4.15886e-10	3.68064e-09	yes
ENSG00000077463	SIRT6	1.10635	2.56052	2.08425	9.15948	13.624	35.5926	99.9677	186.038	275.85	529.271	375.217	278.183	348.164	412.325	286.234	203.879	79.2288	37.0891	0.870511	0.00335833	29.9771	418.045	0.0577431	9.97686	1.04269	0.0820494	0.90476	12.7081	4.16555e-10	3.68099e-09	yes
ENSG00000141753	IGFBP4	1.04488	0.711254	0.656153	2.22048	3.09965	3.54087	7.73943	15.5292	18.5801	71.4695	70.5603	57.4914	66.5162	77.0726	60.9422	52.0496	38.0782	38.3873	0.0393719	0.00128312	29.9697	60.2175	1.03256	10	0.992778	0.0781226	0.904758	12.7079	4.1663e-10	3.68099e-09	yes
ENSG00000185298	CCDC137	1.16781	0.995756	1.23511	4.37157	9.04665	17.4744	34.6841	33.7506	38.8454	116.476	51.0089	86.0522	61.9052	49.7484	49.139	16.9216	6.81005	1.63978	0.316183	0.00862131	30	92.3971	0.645183	3.47176	0.984876	0.0775166	0.904722	12.7054	4.17945e-10	3.6895e-09	yes
ENSG00000221995	TIAF1	0.0614637	0	0.0771944	0.173475	0.432509	0.643794	1.18241	1.7168	1.46913	6.12082	6.10686	3.52743	4.23263	3.6207	4.14344	2.7337	1.10074	1.13993	0.00875303	0.00542829	29.8222	4.48036	0.068416	1.0656	0.999992	0.0787201	0.904692	12.7031	4.19076e-10	3.69636e-09	yes
ENSG00000143612	C1orf43	12.6308	17.2479	20.6495	30.8786	38.7096	90.3611	274.392	544.185	626.366	821.87	558.494	834.607	650.501	528.164	660.308	496.905	277.712	115.442	1.69051	0.00206507	30	729.793	9.90404	9.7305	1.03026	0.0812333	0.904414	12.6827	4.29633e-10	3.78627e-09	yes
ENSG00000133216	EPHB2	0.891223	0.462315	0.926333	1.00616	1.87421	3.08101	7.45279	10.6129	12.1419	38.3451	22.8179	31.2064	23.5987	27.3725	23.1137	17.9057	13.4387	5.24297	0.0376357	0.00269831	29.6258	27.9442	0.678451	3.05213	0.999798	0.078858	0.904357	12.6785	4.31859e-10	3.80269e-09	yes
ENSG00000139651	ZNF740	0.491709	0.92463	1.46669	4.61444	8.10955	25.016	64.7461	68.2426	59.586	77.3503	62.7728	86.1375	69.4247	62.3002	49.0494	13.2858	1.72973	0.837868	0.497457	0.0090925	29.9903	75.8755	0.0271877	9.98618	1.13473	0.0895082	0.904342	12.6774	4.32433e-10	3.80454e-09	yes
ENSG00000102786	INTS6	0.491709	1.5292	2.16144	4.09401	5.37032	7.95546	17.7362	17.246	16.7221	43.1458	23.1729	26.1997	15.2044	23.4621	17.604	6.23284	1.16122	0.668856	0.154159	0.00955022	29.8095	33.056	1.30274	1.77361	1.00006	0.0788928	0.904325	12.6762	4.33068e-10	3.80692e-09	yes
ENSG00000124104	SNX21	0.0614637	0.0711254	0.0385972	0.312255	0	0.827735	1.93486	2.69225	3.37035	40.3854	33.8481	17.2673	34.2867	23.3897	20.0005	13.2038	0.677376	0.373984	0.016045	0.00518318	30	35.1881	4.23925e-06	0	1.02322	0.0807515	0.904258	12.6713	4.35674e-10	3.82413e-09	yes
ENSG00000182372	CLN8	1.90537	0.0355627	0.385972	0.34695	2.05442	1.70146	6.55702	6.86718	6.13576	64.9887	60.8792	44.036	34.4286	39.7794	13.4382	2.84305	0.677376	0.57536	0.0691582	0.0119211	30	67.017	0.2864	0	1.00107	0.0790038	0.904256	12.6711	4.35758e-10	3.82413e-09	yes
ENSG00000140961	OSGIN1	0	0	0.347375	1.66536	2.70318	11.1744	15.6939	12.4077	10.6296	65.1687	31.4574	34.4778	30.0068	25.0552	21.8371	3.03441	0.217728	0.744372	0.18705	0.0141519	30	52.4386	0	2.36318	1.01027	0.0797425	0.904229	12.6691	4.36813e-10	3.83018e-09	yes
ENSG00000165283	STOML2	40.8119	37.5542	35.2007	35.2848	38.241	53.5729	110.144	183.619	242.708	484.685	495.437	413.449	488.455	535.646	447.492	383.019	242.984	209.075	0.547768	0.00131571	29.8674	493.831	0.0151088	9.99431	0.870177	0.068694	0.904206	12.6674	4.3771e-10	3.83483e-09	yes
ENSG00000067182	TNFRSF1A	4.48685	6.97029	8.337	14.0862	26.1668	43.1342	69.3324	71.5982	70.0428	142.159	186.236	173.384	188.955	166.649	150.082	74.22	10.8138	4.55973	0.282942	0.00359249	12.1241	190.971	9.0267	0	1.0263	0.0810702	0.904096	12.6594	4.42032e-10	3.86944e-09	yes
ENSG00000011295	TTC19	6.14637	16.5367	22.0776	34.7644	52.8743	90.683	136.73	165.554	228.147	79.1506	79.1998	85.7393	70.6779	48.0105	61.099	53.5258	34.9937	20.2635	0.673082	0.00278101	0	69.8177	9.37458	10	0.953497	0.0753261	0.90408	12.6583	4.42638e-10	3.8715e-09	yes
ENSG00000136709	WDR33	0.583905	0.711254	1.62108	3.29603	3.20778	6.85181	12.2183	20.3674	17.4135	14.702	18.2259	12.09	10.9717	17.0897	13.4158	6.99827	0.96768	0.474672	0.0760591	0.00380551	29.673	16.6629	1.24175	0	1.01104	0.0798912	0.904039	12.6553	4.44258e-10	3.88243e-09	yes
ENSG00000156860	FBRS	0.460977	0.640129	1.50529	2.0817	2.48693	10.2087	30.2053	34.9212	35.7776	90.5521	78.8921	89.0391	78.8121	94.283	96.8894	48.5505	15.6038	6.30019	0.127226	0.00273441	29.0328	96.6736	1.03399	0	1.02595	0.0810967	0.903979	12.6509	4.46639e-10	3.89998e-09	yes
ENSG00000115211	EIF2B4	4.1488	2.95171	3.78253	4.64913	5.44241	6.98977	15.7297	21.616	33.6603	50.0467	39.7183	41.5042	48.427	47.6484	43.3158	39.9394	24.4944	10.2918	0.0729864	0.00190138	29.6182	39.7345	2.80744	8.53617	1.03659	0.0819554	0.903942	12.6482	4.48119e-10	3.90963e-09	yes
ENSG00000108176	DNAJC12	0.522441	0.248939	0.656153	1.17963	2.23463	3.35693	10.3551	18.9238	27.7838	32.4043	18.5573	31.2348	23.6696	28.3863	22.285	13.9692	6.50765	2.77252	0.0776833	0.00263731	30	28.8412	0	0	1.0445	0.0826005	0.903901	12.6452	4.49766e-10	3.92073e-09	yes
ENSG00000123374	CDK2	1.53659	1.8137	3.01058	4.12871	5.04594	12.7839	37.1206	56.9664	65.0737	70.3894	82.4899	91.4571	78.1737	77.483	82.3314	69.4907	30.2037	5.32927	0.195312	0.00234937	25.561	77.9382	0.454613	9.96813	1.04119	0.0823515	0.903874	12.6432	4.50846e-10	3.92687e-09	yes
ENSG00000146007	ZMAT2	2.98099	2.31158	4.51587	5.10017	8.90248	16.8306	55.1435	89.1173	149.332	538.332	346.339	404.033	342.205	380.994	379.696	306.967	141.862	48.2403	0.356608	0.00224153	30	442.525	3.52656	0	1.04695	0.08288	0.903721	12.6321	4.57006e-10	3.97521e-09	yes
ENSG00000186174	BCL9L	0.860491	0.78238	1.19651	2.28987	4.36114	12.2321	24.5799	24.1132	19.6172	44.4659	26.7708	43.6093	33.0571	27.1552	23.9648	12.329	1.99584	0.658068	0.146561	0.00609941	29.5244	40.3343	1.09468	1.48398	1.0008	0.0792284	0.903717	12.6319	4.57157e-10	3.97521e-09	yes
ENSG00000169564	PCBP1	6.8532	10.2776	14.7441	27.4784	37.0516	70.7714	194.812	372.857	349.782	458.881	463.175	532.642	392.949	495.553	478.557	395.976	95.4979	28.7752	1.15191	0.00237	30	521.241	6.90298e-08	0	1.01434	0.080328	0.903658	12.6275	4.59582e-10	3.99297e-09	yes
ENSG00000109189	USP46	0.553173	0.284502	0.115792	0.55512	0.720849	1.74744	10.8925	18.4946	15.469	21.6629	25.5636	30.1254	25.2539	18.7069	22.1506	7.21697	2.03213	0.266104	0.0728704	0.0039592	30	27.4689	0	0	1.05072	0.0832196	0.903635	12.6259	4.60513e-10	3.99775e-09	yes
ENSG00000134574	DDB2	0.645368	1.49363	2.54742	3.43481	5.2622	12.9679	19.7069	32.6191	39.2775	51.6069	53.2102	51.4322	63.9624	64.2071	43.0694	44.9147	30.4456	13.0966	0.0909502	0.00156681	29.7323	58.8489	2.4669	0	1.01125	0.0801028	0.903615	12.6244	4.61325e-10	4.00146e-09	yes
ENSG00000148516	ZEB1	0.6761	1.8137	3.01058	11.5534	12.0382	18.624	61.4138	47.8362	40.401	109.995	71.5307	93.7044	72.9716	69.3485	37.2462	13.3951	1.89907	3.7722	0.409732	0.0085632	28.2795	102.33	2.2446	2.27839	1.00661	0.0797561	0.903569	12.6211	4.63217e-10	4.01455e-09	yes
ENSG00000149115	TNKS1BP1	0	0.426753	0.69475	1.11024	1.62191	13.0138	17.772	31.2145	29.901	7.08094	6.24888	8.1074	8.93819	7.89313	5.68884	1.17549	1.10074	0.86304	0.14428	0.00435651	30	8.34585	0	0.116471	1.0041	0.0795931	0.903491	12.6155	4.66409e-10	4.03886e-09	yes
ENSG00000103199	ZNF500	0.122927	0	0.308778	1.24902	3.13569	7.12772	10.6417	10.0667	11.4938	99.4933	35.6944	43.4955	32.064	28.9897	5.68884	1.50354	1.33056	0.366792	0.270926	0.028392	30	86.0185	0	3.01591	1.03052	0.0816934	0.903478	12.6145	4.66972e-10	4.04039e-09	yes
ENSG00000168734	PKIG	0	0	0	0.41634	1.51378	1.10365	3.00978	7.49147	12.4444	22.683	21.161	22.3593	17.5926	23.3173	17.3353	18.6985	12.846	5.43715	0.02486	0.00138297	30	22.3544	0	0	1.03694	0.0822158	0.903449	12.6124	4.68161e-10	4.04733e-09	yes
ENSG00000070610	GBA2	0.460977	0.533441	1.04212	2.60213	7.78517	23.0846	30.0978	28.7173	28.5183	32.0443	32.0965	18.775	31.2127	26.5035	20.9412	8.69317	1.95955	1.01048	0.240161	0.00758045	23.1961	30.9054	0.496751	3.34938	0.999971	0.0792974	0.903421	12.6104	4.69325e-10	4.05404e-09	yes
ENSG00000108256	NUFIP2	0.860491	1.28026	2.7018	5.5859	8.07351	24.0963	52.8145	46.3535	37.5924	43.5058	50.8432	59.2835	38.4484	34.2277	14.9164	2.24163	1.40314	1.2586	0.41576	0.00902365	30	56.4735	0.729409	0.0368137	1	0.079315	0.903388	12.608	4.70708e-10	4.06262e-09	yes
ENSG00000113312	TTC1	1.29074	2.0982	2.39303	3.29603	2.99152	13.1978	18.8828	30.6682	35.3887	72.4297	83.6498	80.4197	80.4437	101.621	75.4555	69.5453	31.002	9.06911	0.0911793	0.00192693	29.7285	89.5387	2.27631	0	1.03031	0.0818413	0.903127	12.5892	4.81692e-10	4.154e-09	yes
ENSG00000174720	LARP7	1.29074	2.48939	5.44221	6.52266	8.07351	12.7379	31.8535	54.8984	59.5428	103.274	65.1398	101.101	62.7328	80.1382	81.5251	51.3389	23.8412	6.60226	0.184352	0.00261782	28.5462	91.6079	2.37918	0	1.01784	0.0808561	0.903115	12.5883	4.82211e-10	4.15504e-09	yes
ENSG00000276234	TADA2A	0.614637	0.995756	0.617555	1.17963	3.92863	6.71385	11.1434	10.769	11.1481	78.9105	49.636	84.7436	57.3652	44.2691	48.3551	11.3449	2.35872	1.00328	0.0663878	0.00584412	29.6946	75.5456	1.09786	0	1.00979	0.0802221	0.903102	12.5874	4.8273e-10	4.15609e-09	yes
ENSG00000064995	TAF11	1.96684	1.92039	2.7018	4.44096	8.36185	19.6817	46.8666	68.5938	65.5058	164.902	217.788	163.115	217.212	188.059	183.342	146.034	33.4212	7.11289	0.22029	0.0025222	24.2349	209.724	2.22978	0	1.03656	0.0823807	0.903034	12.5825	4.8563e-10	4.17762e-09	yes
ENSG00000107625	DDX50	1.59806	1.70701	3.39655	5.30834	7.641	7.8175	24.7232	39.9155	40.7034	176.544	125.735	179.842	107.731	112.724	122.153	99.6434	35.6711	14.8802	0.132174	0.00273257	29.0036	156.273	2.16935	0	1.00949	0.0802513	0.902987	12.5792	4.87644e-10	4.19149e-09	yes
ENSG00000164885	CDK5	0.645368	0.497878	0.540361	0.381645	0.468552	1.51751	4.12053	6.477	10.5864	10.5614	13.5156	10.9805	10.5698	12.238	10.4146	9.32192	8.09222	3.57802	0.0204212	0.00117855	30	12.0242	0.223467	0	1.02274	0.0813148	0.902965	12.5776	4.88591e-10	4.19618e-09	yes
ENSG00000197056	ZMYM1	0	0.106688	0.578958	1.04085	1.08127	1.65547	3.00978	5.50155	4.53701	14.2219	12.7108	15.5321	14.5423	17.2345	9.87708	1.39419	0.834624	0.5394	0.0242096	0.00490964	23.4756	16.5806	0.202478	0	1.02211	0.0812736	0.902945	12.5761	4.89461e-10	4.2002e-09	yes
ENSG00000169018	FEM1B	0.215123	0.177814	0.926333	2.39396	5.0099	8.36932	17.4496	16.6217	11.0184	20.2827	24.7588	22.1887	16.5995	17.8621	11.8704	0.464729	0.314496	0.402752	0.118593	0.00790637	30	25.1854	0.893723	0	1.00157	0.0796513	0.902922	12.5745	4.90448e-10	4.20522e-09	yes
ENSG00000138035	PNPT1	2.27416	3.27177	1.50529	3.88584	6.41556	9.65691	18.4886	27.7419	24.5431	191.125	125.593	154.439	131.685	152.407	149.858	104.373	34.0744	7.40416	0.0748977	0.00283743	29.7049	163.079	5.10243	5.86713	1.08495	0.0863148	0.902855	12.5697	4.9335e-10	4.22663e-09	yes
ENSG00000137073	UBAP2	0.829759	1.49363	1.04212	3.26133	6.41556	12.37	13.7948	20.3284	17.3703	86.0515	79.5785	83.0937	63.4659	52.2829	61.4574	49.4253	15.3982	4.80066	0.0642477	0.00310166	27.5394	82.0577	2.73551	0	1.00897	0.0803034	0.902783	12.5645	4.96516e-10	4.25028e-09	yes
ENSG00000160072	ATAD3B	0.399514	0.0355627	0.385972	1.07555	1.91025	5.19634	8.34856	12.4468	18.8394	24.4233	22.7469	19.9413	16.6468	16.2207	20.7172	12.1376	11.1525	6.7425	0.0481406	0.00217828	29.9847	18.4518	0.3875	3.19293	1.00001	0.0795949	0.902772	12.5637	4.96984e-10	4.2508e-09	yes
ENSG00000084090	STARD7	4.27172	5.54778	7.17908	12.3167	17.1922	42.5824	120.212	184.009	165.709	267.696	364.589	333.114	380.417	356.567	325.361	226.952	91.5425	24.985	0.548618	0.00242308	26.4699	366.258	8.1197	3.64992	1.04085	0.0828614	0.902739	12.5613	4.98433e-10	4.25971e-09	yes
ENSG00000167536	DHRS13	0.737564	0.746817	0.347375	0.520425	0.973146	3.31094	11.9316	27.6248	57.2959	194.066	162.116	132.791	161.597	145.769	138.817	101.284	45.6866	29.106	0.131567	0.00245656	30	173.311	0	0	1.04094	0.082876	0.902722	12.5602	4.99151e-10	4.26235e-09	yes
ENSG00000157514	TSC22D3	1.22927	7.64598	19.1056	16.8271	17.6608	25.062	65.7494	76.2803	67.407	192.926	142.02	176.371	159.611	192.742	115.904	88.1618	42.336	19.9938	0.225238	0.002815	0.827618	174.616	9.87904	1.33578	1.07461	0.08558	0.902675	12.5568	5.01228e-10	4.2766e-09	yes
ENSG00000165300	SLITRK5	0.215123	0.497878	0.231583	0.381645	1.40566	2.94306	11.7166	14.9049	12.8765	36.9049	20.7586	23.099	16.8596	13.7828	11.1313	3.17109	0.350784	0.320044	0.137515	0.0112265	30	30.7656	0	0.352106	1.0338	0.082389	0.902549	12.5478	5.06791e-10	4.32054e-09	yes
ENSG00000008853	RHOBTB2	4.02587	6.18791	9.99668	19.4986	35.1053	87.464	148.697	188.887	158.493	100.993	153.334	127.699	128.492	116.707	98.4572	77.6644	14.3459	4.06708	0.885018	0.00471204	23.6523	134.329	8.04358	10	0.986148	0.0786445	0.90243	12.5393	5.12117e-10	4.36239e-09	yes
ENSG00000147118	ZNF182	0	0.355627	1.15792	2.91438	4.10884	8.36932	15.4072	14.2026	9.76537	45.246	20.9243	17.9785	19.6262	16.3656	5.64404	2.515	0.677376	0.222952	0.258908	0.0211213	30	37.9669	0.0161091	1.6455	1	0.0797749	0.902374	12.5353	5.14634e-10	4.37846e-09	yes
ENSG00000171681	ATF7IP	2.61221	4.33865	9.7265	7.97985	14.1647	22.5788	59.9089	49.4749	44.8516	54.7873	46.0855	43.467	23.7169	40.2622	28.0858	4.37392	0.653184	1.39525	0.410639	0.00846249	25.7588	52.241	3.47542	1.12363	1	0.0797776	0.902368	12.5348	5.14931e-10	4.37846e-09	yes
ENSG00000170421	KRT8	3.81075	3.02283	7.75804	10.6167	11.8219	23.5905	34.2183	63.3263	74.623	115.575	110.586	87.9581	111.704	86.583	82.4882	75.6141	59.6091	53.1237	0.160658	0.001343	28.7333	95.5284	5.5164	9.41445	0.970418	0.077423	0.902355	12.534	5.15486e-10	4.37846e-09	yes
ENSG00000182149	IST1	1.3522	2.73833	7.87383	16.4454	24.653	51.9174	181.303	208.357	249.708	164.302	243.044	208.346	229.224	256.394	166.387	77.309	10.4268	6.27862	1.05542	0.0039892	29.8587	230.779	0.10786	9.96938	1.03851	0.0828576	0.902351	12.5337	5.15679e-10	4.37846e-09	yes
ENSG00000122406	RPL5	105.472	119.42	113.862	166.432	238.637	330.45	628.757	1507.78	2080.02	2233.38	2623.32	2270.07	2721.89	2449.72	1992.66	1945.03	1470.09	1375.52	4.0069	0.000932866	30	2464.51	10	10	0.97101	0.0775324	0.902214	12.5239	5.21901e-10	4.42769e-09	yes
ENSG00000242110	AMACR	0.0921955	0.320064	0.385972	2.28987	1.80212	4.73649	6.95116	16.5437	15.7283	40.3854	42.0853	53.139	32.5605	24.5001	31.087	15.8828	7.14874	1.32333	0.0676673	0.00401355	30	44.0519	0.149641	0	1.00507	0.0802609	0.902194	12.5225	5.2281e-10	4.4318e-09	yes
ENSG00000101138	CSTF1	0.430246	1.03132	2.12285	4.92669	6.1993	19.3138	47.189	41.5543	33.401	153.68	140.221	172.673	128.823	152.069	78.2103	12.7937	2.54016	1.60741	0.270919	0.0063761	29.8293	174.484	1.42443	0	1.0181	0.081312	0.902172	12.521	5.23815e-10	4.43319e-09	yes
ENSG00000008283	CYB561	7.16052	9.21074	19.26	49.0241	73.5987	167.984	446.809	787.19	1091.78	2852.12	1636.47	1810.68	1753.11	1501.43	1647.28	1100.92	477.695	226.746	3.44302	0.00312592	30	2137.81	1.24375	9.41264	1.01726	0.0812449	0.902172	12.5209	5.23823e-10	4.43319e-09	yes
ENSG00000112419	PHACTR2	0.245855	0.355627	1.00353	1.17963	2.8834	4.87444	11.645	16.0754	16.2468	57.1876	36.4991	44.4911	23.5987	32.538	39.2395	12.247	1.83859	1.05722	0.08394	0.0049616	30	47.1304	0.27149	0	1.00763	0.0804904	0.90214	12.5187	5.25293e-10	4.44204e-09	yes
ENSG00000143553	SNAPIN	1.59806	1.06688	3.31936	3.36542	6.59577	13.2438	31.3877	60.517	65.3329	56.5875	90.7034	70.0081	81.0112	87.2589	67.303	49.2613	19.4383	6.1096	0.198959	0.00242306	30	82.724	0.856307	0	1.02901	0.0822042	0.902127	12.5178	5.25886e-10	4.44346e-09	yes
ENSG00000120697	ALG5	1.41366	0.497878	2.23864	2.25518	4.32509	4.59853	9.45931	14.6318	21.2591	61.3882	65.5186	64.9729	72.5459	55.7105	49.9453	55.0567	41.1022	32.7883	0.0403946	0.0012013	25.5128	55.1125	1.54872	9.99795	1.00072	0.0799556	0.902101	12.5159	5.27067e-10	4.44984e-09	yes
ENSG00000131473	ACLY	9.6498	11.8424	15.4389	20.1925	19.7152	57.2977	105.593	166.49	194.184	171.323	241.813	194.919	202.788	211.811	196.623	161.616	130.637	67.6803	0.429366	0.00135785	13.164	206.852	10	8.41375	1.00298	0.080143	0.902086	12.5148	5.27778e-10	4.45225e-09	yes
ENSG00000007520	TSR3	0.952687	1.13801	0.96493	1.31841	1.73004	5.9321	11.645	40.8519	37.8948	131.418	129.901	92.1114	123.881	133.145	102.511	89.5287	52.0249	31.296	0.10789	0.00205583	29.5034	119.237	0.559099	9.99802	1.03207	0.0824753	0.902069	12.5137	5.28544e-10	4.45334e-09	yes
ENSG00000255508	AP002990.1	14.8435	15.3631	18.4495	21.3027	29.0142	69.5758	168.333	286.432	522.793	885.718	827.101	588.597	834.775	737.802	569.757	453.357	325.878	268.891	1.167	0.00189694	30	791.522	0	10	0.995903	0.0795874	0.902064	12.5133	5.2876e-10	4.45334e-09	yes
ENSG00000254772	EEF1G	13.9523	14.1184	15.4775	18.7006	26.7435	61.1145	144.72	243.278	471.287	714.515	670.595	490.967	687.271	607.119	465.499	381.351	271.846	217.608	1.00822	0.00179207	30	652.993	0.0213141	0.330261	1.00179	0.0800662	0.902046	12.512	5.29629e-10	4.45707e-09	yes
ENSG00000072803	FBXW11	2.15123	1.35138	1.92986	3.08786	3.89258	5.24232	24.5799	38.94	31.1109	63.2484	41.3988	64.3187	48.1196	47.6484	49.2958	20.7488	2.76998	1.72968	0.151396	0.00394907	28.8699	60.5805	0.412533	0	1.01953	0.081523	0.901961	12.506	5.33528e-10	4.48627e-09	yes
ENSG00000183718	TRIM52	0	0	0.154389	0.34695	1.1894	2.57518	4.80132	6.0478	5.48762	7.26097	4.00023	6.173	3.26315	2.48621	2.68764	0.601414	1.18541	0.19778	0.054169	0.00977995	30	5.77366	0	0.385132	1.0164	0.0812862	0.901932	12.504	5.34889e-10	4.49232e-09	yes
ENSG00000125977	EIF2S2	4.0566	5.47666	6.29135	9.12479	12.9392	31.224	69.1174	124.624	151.623	37.685	60.8792	44.0928	47.5285	48.5898	41.86	34.6907	20.7325	12.9888	0.372819	0.00173472	30	50.3452	3.88122	0	1.00628	0.0804791	0.901928	12.5037	5.35108e-10	4.49232e-09	yes
ENSG00000086666	ZFAND6	3.44197	5.97454	11.7336	19.9843	25.0855	40.4671	135.333	192.593	145.616	249.153	247.115	260.347	308.58	268.221	232.212	154.837	21.0833	4.97686	0.645967	0.00324486	22.503	295.512	5.72452	0	1.02771	0.0822114	0.901888	12.5009	5.36954e-10	4.50421e-09	yes
ENSG00000136840	ST6GALNAC4	4.54831	3.09396	4.36148	4.23279	5.44241	10.4387	18.202	45.5341	73.3267	84.9713	88.2891	66.1108	75.1943	73.5968	79.1734	72.7438	42.6505	22.6692	0.145193	0.00131003	30	83.1542	0.36349	0	1.02239	0.0818269	0.901799	12.4945	5.41153e-10	4.53498e-09	yes
ENSG00000151327	FAM177A1	1.90537	1.10244	2.04565	2.60213	3.67633	8.41531	22.3225	42.4126	48.8269	67.389	66.7967	93.1355	64.128	64.6174	78.1207	29.3326	16.1119	3.92324	0.160466	0.00290136	30	79.4052	3.79588e-09	0	1.02644	0.0821543	0.901791	12.494	5.4149e-10	4.53498e-09	yes
ENSG00000126432	PRDX5	0.491709	0.675692	0.501764	1.11024	0.792934	2.39124	3.18893	11.3543	12.8333	100.513	84.7859	82.923	95.5298	93.7279	63.8986	56.0955	56.452	27.6389	0.0329318	0.00188516	30	83.67	2.76275e-08	9.99992	0.987795	0.0790953	0.901715	12.4887	5.45092e-10	4.56149e-09	yes
ENSG00000182154	MRPL41	1.69025	1.95595	1.96846	2.63682	4.03675	4.04671	5.73291	12.4077	14.2592	16.9823	21.3267	15.6743	20.5957	20.7345	13.707	11.5362	9.48326	4.17855	0.0315228	0.00184404	22.3298	19.6165	1.78459	0	1.0086	0.0807743	0.901686	12.4866	5.46491e-10	4.56954e-09	yes
ENSG00000104969	SGTA	1.04488	0.604566	1.85267	3.29603	5.22616	13.6576	50.8796	100.433	205.073	193.286	163.678	121.241	154.03	148.98	135.121	110.195	53.428	30.0877	0.439808	0.00200293	30	154.781	0	9.82944	1.10552	0.0885419	0.901676	12.4859	5.46978e-10	4.56996e-09	yes
ENSG00000144021	CIAO1	0.430246	0.213376	0.308778	0.797985	0.973146	3.35693	6.80784	12.3297	16.2036	22.0829	33.28	26.029	29.8649	30.9449	24.5023	23.2911	11.6968	6.13118	0.0396631	0.00171789	29.6961	30.0141	0.00127183	0	1.01216	0.081076	0.90165	12.484	5.4821e-10	4.57659e-09	yes
ENSG00000083520	DIS3	2.0283	4.80097	9.53351	13.9821	19.535	27.9591	47.9415	60.8292	64.6416	122.056	70.0395	72.5967	65.9014	65.4623	75.9034	45.1607	12.0476	5.50188	0.248248	0.00373004	8.47631	91.9848	5.55175	0.461128	1.0084	0.0807995	0.901596	12.4803	5.50784e-10	4.59441e-09	yes
ENSG00000178409	BEND3	0	0.426753	0.463167	0.6939	1.29753	2.66715	5.37461	6.63307	4.40738	11.6416	13.2079	12.8011	7.89776	12.5518	7.34622	1.03881	0.435456	0	0.0354462	0.00623696	30	13.7114	0.327683	0	1.01405	0.0812634	0.901572	12.4786	5.51938e-10	4.60036e-09	yes
ENSG00000178718	RPP25	0.184391	0.711254	1.27371	2.87969	5.04594	12.0022	17.3062	31.9558	20.9134	38.4051	41.8722	33.8804	36.7459	39.8036	36.6415	10.8801	1.17331	0.578956	0.120522	0.00424376	17.0325	43.7912	0.447861	0	1.02272	0.0820116	0.901456	12.4705	5.57491e-10	4.64295e-09	yes
ENSG00000198146	ZNF770	1.19854	1.99151	3.70533	8.53497	12.8311	34.6269	86.997	77.0607	64.6416	44.946	49.1863	58.3732	46.1806	38.0174	32.3189	4.67463	1.5241	0.776736	0.627403	0.00804448	30	55.638	0.95947	2.62907	1	0.0802143	0.901401	12.4666	5.60151e-10	4.66139e-09	yes
ENSG00000111602	TIMELESS	1.41366	1.8137	1.73687	2.18579	4.43322	7.17371	14.4398	18.1434	23.29	41.1055	37.3986	31.7184	39.4179	39.007	40.7625	27.8837	22.5832	18.2713	0.0531785	0.00167503	29.8626	30.6794	2.20433	9.28829	0.998128	0.0800907	0.901342	12.4625	5.63024e-10	4.68157e-09	yes
ENSG00000152102	FAM168B	0.245855	0.711254	1.27371	2.0817	2.55901	4.64451	17.2346	31.0194	27.0924	23.8232	34.1795	32.6856	29.8885	33.1415	25.667	21.7056	4.69325	3.27236	0.09894	0.00266979	30	33.4127	8.08551e-07	0	1.00937	0.0810043	0.901317	12.4607	5.64248e-10	4.68802e-09	yes
ENSG00000137054	POLR1E	0.276586	1.31582	0.887736	2.70621	2.19859	6.43794	22.8242	36.677	34.3948	165.622	115.652	192.416	129.675	117.238	129.768	87.8885	24.5791	4.82224	0.143017	0.00348293	29.9292	152.049	0.00254021	9.99781	1.03407	0.0830036	0.901281	12.4582	5.66025e-10	4.69904e-09	yes
ENSG00000095752	IL11	18.4698	57.2204	125.557	234.053	307.154	476.086	705.471	624.367	487.836	534.071	683.022	525.018	627.967	436.922	248.54	69.5727	16.9949	6.12039	5.65553	0.00895016	0	690.768	10	10	0.980396	0.07871	0.901247	12.4558	5.67679e-10	4.70903e-09	yes
ENSG00000105647	PIK3R2	0.307318	0.177814	0.192986	0.312255	0.468552	1.14963	2.90229	5.46253	6.52465	6.66089	8.68689	8.02205	9.50569	7.79657	8.42127	5.60408	3.6288	3.01345	0.0152943	0.00149624	30	8.59292	0.132066	0	1.00521	0.0807192	0.901209	12.4531	5.69562e-10	4.72091e-09	yes
ENSG00000126215	XRCC3	0.0614637	0.355627	0.192986	0.34695	1.00919	0.597809	2.11401	4.60413	6.00614	9.84131	8.82891	7.45311	5.69869	6.58967	7.41341	5.6861	2.1289	2.11445	0.015522	0.00215456	30	8.42953	0.0743662	0	1.00702	0.080892	0.901149	12.449	5.72517e-10	4.74164e-09	yes
ENSG00000188994	ZNF292	0.245855	0.320064	0.617555	1.63067	1.76608	4.3686	9.28015	12.0566	12.3579	8.34111	4.11858	6.45747	5.53316	3.91036	1.25423	0.902121	0.217728	1.01767	0.0817271	0.00674436	29.7472	6.67465	0.102148	0	1.01169	0.0812865	0.901107	12.446	5.74634e-10	4.7554e-09	yes
ENSG00000173598	NUDT4	1.90537	1.92039	1.46669	4.12871	4.32509	15.497	52.2053	71.325	62.9996	108.734	179.561	163.684	163.725	153.928	105.49	36.2215	6.73747	3.22921	0.326059	0.00438857	30	170.344	0	0	1.02883	0.0826726	0.901088	12.4447	5.75548e-10	4.75917e-09	yes
ENSG00000085185	BCORL1	0	1.03132	1.81407	2.0817	3.35195	7.26568	7.81109	10.1447	9.98142	12.7817	14.1783	8.19274	12.1304	9.70348	11.6016	2.2143	0.653184	0.046748	0.0535047	0.00504345	0	13.6188	0.448639	0	1.00789	0.080994	0.901079	12.4441	5.75999e-10	4.75917e-09	yes
ENSG00000168137	SETD5	5.22441	23.2225	27.6356	51.3833	77.1669	197.231	336.343	230.168	213.715	169.163	193.976	146.9	142.467	128.993	90.3719	21.4869	8.24947	5.72124	2.96759	0.0115606	25.9	198.056	10	10	0.958555	0.0770553	0.901018	12.4398	5.79023e-10	4.78037e-09	yes
ENSG00000213923	CSNK1E	3.13465	7.53929	11.6178	15.8556	34.4205	59.367	141.28	135.822	133.777	133.938	212.77	179.33	181.341	149.487	131.493	57.4897	22.4502	9.58694	0.692008	0.00453877	18.1322	189.757	6.50458	4.64428	0.99832	0.0802576	0.901006	12.4389	5.79655e-10	4.78046e-09	yes
ENSG00000099194	SCD	10.4181	9.85087	16.4424	19.9149	26.8877	54.4006	146.906	269.888	342.566	336.105	427.03	442.863	354.288	436.874	390.29	332.227	205.959	174.697	0.730503	0.00123345	25.0231	407.652	6.17004	10	1.0083	0.0810627	0.901	12.4385	5.79949e-10	4.78046e-09	yes
ENSG00000107897	ACBD5	1.50586	0.889068	0.69475	1.4225	1.40566	8.73721	27.8763	35.1553	26.2714	118.396	65.7079	84.7436	53.7946	66.5243	53.5288	18.5618	5.23757	1.33771	0.223516	0.00725604	30	95.2308	0	2.25254	1.01816	0.0818905	0.900923	12.4331	5.83839e-10	4.80522e-09	yes
ENSG00000147872	PLIN2	0.737564	0.497878	0.849139	0.659205	1.694	2.66715	8.99351	12.3297	12.79	12.0616	19.6224	17.438	17.0251	17.1621	15.8571	5.74077	2.09261	0.726392	0.0491307	0.00337639	30	18.4276	0.376948	0	1.02497	0.0824392	0.900922	12.4331	5.83871e-10	4.80522e-09	yes
ENSG00000159884	CCDC107	1.47513	0.853505	4.05271	9.61052	14.8855	25.016	77.466	148.659	243.918	136.698	115.178	72.7105	109.528	107.052	87.6843	48.5232	14.7934	9.60132	0.595825	0.00221547	30	111.432	0	0	1.12943	0.090855	0.900894	12.4311	5.85299e-10	4.81317e-09	yes
ENSG00000131467	PSME3	12.0161	5.47666	7.83523	10.7901	21.8778	42.8583	90.0784	173.084	229.745	217.469	285.886	255.226	311.914	280.653	256.244	211.069	147.765	99.7243	0.492198	0.00132824	26.2527	271.353	4.22169	9.98564	1.01329	0.081536	0.900841	12.4275	5.87949e-10	4.83033e-09	yes
ENSG00000152464	RPP38	0.368782	0.284502	2.779	6.52266	8.36185	20.2335	29.8112	31.3705	25.2344	37.9251	52.2634	46.5393	31.3073	38.138	3.94187	4.48327	3.6288	2.6035	0.289498	0.0100168	29.009	49.857	1.3581	1.33956	0.997917	0.0803025	0.900834	12.427	5.88309e-10	4.83033e-09	yes
ENSG00000130635	COL5A1	4.11807	5.83228	7.48786	8.04924	10.3081	22.1649	31.6027	43.9344	43.4689	32.0443	34.7476	25.1471	32.8206	37.1242	26.518	20.0107	12.9911	13.3915	0.171651	0.00382448	11.5596	24.8627	4.44391	10	0.971331	0.0781837	0.900787	12.4237	5.907e-10	4.84615e-09	yes
ENSG00000181315	ZNF322	0	0.711254	0	1.00616	1.26149	5.05838	5.12379	3.90181	3.62961	10.5014	8.16615	5.97387	0.922194	3.6207	0.806292	0	0	0	0.106667	0.0246759	30	10.7954	0.0329902	0	1.00014	0.0805115	0.900768	12.4224	5.9169e-10	4.84872e-09	yes
ENSG00000132300	PTCD3	0.491709	2.02707	2.12285	4.1981	7.92934	14.0255	32.4626	39.0571	40.8331	71.9496	41.2331	46.9376	37.4789	32.9725	30.8183	28.2938	11.5033	3.02424	0.25356	0.00628505	30	47.9304	0.86864	7.55073	1	0.0805036	0.90076	12.4218	5.92095e-10	4.84872e-09	yes
ENSG00000147475	ERLIN2	0.983419	0.640129	1.27371	1.59597	3.46008	1.79343	6.27037	10.2618	15.3394	25.2634	29.7059	21.1646	20.8321	17.3069	18.8807	15.5274	10.8864	5.50907	0.0347211	0.00195227	29.7327	24.3803	0.848974	0	1.00164	0.080638	0.900754	12.4214	5.92404e-10	4.84872e-09	yes
ENSG00000115295	CLIP4	0.0614637	0.355627	0	0.34695	0.756891	1.33357	4.5505	5.30646	4.66664	10.8014	6.31989	4.83599	5.93515	5.79312	2.46367	1.36685	1.04026	0.550188	0.0498165	0.0107962	30	8.29404	0	0.59724	1.02208	0.0823473	0.900616	12.4118	5.99462e-10	4.90264e-09	yes
ENSG00000100109	TFIP11	0.645368	0.497878	2.89479	6.59205	6.52368	22.5328	50.8438	59.9708	68.1416	103.334	114.208	61.4171	112.224	114.656	73.5517	22.9904	4.81421	1.74406	0.364117	0.00527796	29.9615	103.343	0.00621235	9.98851	1.04515	0.0842421	0.900539	12.4065	6.03454e-10	4.93143e-09	yes
ENSG00000110917	MLEC	1.72098	1.45807	1.81407	2.18579	5.33428	15.8189	32.5343	66.0186	84.6908	240.392	145.618	218.245	168.17	176.763	193.04	138.927	79.5675	30.6307	0.227614	0.00216375	29.9988	197.829	0.00766679	9.99843	1.02504	0.0826826	0.900406	12.3973	6.10398e-10	4.98428e-09	yes
ENSG00000011275	RNF216	0.952687	1.56476	1.77547	3.08786	6.23534	10.8985	20.1369	19.9382	22.685	105.194	59.033	87.5883	75.4544	68.8657	72.2975	47.7577	10.209	2.39494	0.0860385	0.0033178	0.129896	89.7211	0.930247	0	1.02035	0.0823112	0.900391	12.3963	6.11161e-10	4.98662e-09	yes
ENSG00000177311	ZBTB38	0.153659	1.13801	1.00353	1.90823	3.5682	5.19634	23.3975	24.6984	19.0554	20.5227	12.1664	15.8165	10.4988	14.7	8.17491	3.08908	0.387072	0.183396	0.161514	0.00696732	30	17.9709	0	0	1.00303	0.0809967	0.900207	12.3835	6.20898e-10	5.06211e-09	yes
ENSG00000123352	SPATS2	1.59806	1.28026	2.43162	6.2451	9.0827	14.1175	37.7297	66.2917	72.7218	172.823	86.2535	123.005	103.546	89.383	92.1189	56.4236	18.0593	4.66761	0.333011	0.00468881	30	123.57	0	9.99994	1.02659	0.082904	0.900197	12.3829	6.21408e-10	5.06232e-09	yes
ENSG00000232838	PET117	0.122927	0.177814	0.578958	0.83268	1.694	3.31094	5.30295	7.17933	4.62343	3.7805	3.95289	3.58432	2.3646	4.07932	2.06052	0.519403	0.374976	0.133052	0.0471106	0.00794812	23.2845	4.02723	0.15037	0.278614	1	0.0807971	0.900107	12.3767	6.26212e-10	5.09748e-09	yes
ENSG00000123975	CKS2	0.522441	0.569003	1.08072	1.83884	2.23463	5.97809	25.0098	61.5705	59.9749	147.8	120.054	160.043	125.277	158.056	153.912	89.5833	29.1393	9.31004	0.191333	0.0025225	30	157.585	0	0	1.05707	0.0854842	0.899947	12.3657	6.34843e-10	5.16257e-09	yes
ENSG00000159479	MED8	28.1504	24.4671	29.3339	31.7112	39.8269	57.1597	100.613	136.095	144.277	103.574	145.026	129.519	151.665	152.938	128.76	68.6159	21.2406	7.38978	0.482259	0.00298428	0	149.769	10	0	0.961082	0.0777274	0.899934	12.3648	6.35564e-10	5.16257e-09	yes
ENSG00000164403	SHROOM1	1.22927	1.24469	3.58954	7.94516	16.0749	39.5474	83.8797	120.254	135.678	425.217	228.771	195.858	224.353	231.508	234.541	73.4545	8.39462	3.952	0.717957	0.00551329	30	318.458	0.0232101	0	1.01648	0.0822091	0.899932	12.3646	6.35689e-10	5.16257e-09	yes
ENSG00000147041	SYTL5	0.0614637	0.355627	0.463167	0.48573	0.792934	1.19562	4.51467	6.55504	8.81476	9.7213	6.76962	5.97387	7.6613	7.72416	6.0024	6.56088	2.80627	1.14353	0.0226257	0.00199897	30	8.11545	0.146476	0	1.0211	0.082605	0.899882	12.3612	6.38371e-10	5.17627e-09	yes
ENSG00000173812	EIF1	5.71612	7.1481	14.4354	19.8109	26.8877	56.5159	116.557	158.179	185.067	247.173	338.599	328.136	307.564	366.029	311.43	226.296	124.347	85.2036	0.449927	0.00170223	9.26331	333.793	9.9983	0.0380171	1.03004	0.0833317	0.899874	12.3607	6.38829e-10	5.17627e-09	yes
ENSG00000109099	PMP22	9.43467	13.9761	20.5723	33.3419	50.8559	71.7371	217.564	271.527	212.894	2758.99	1876.34	2460.55	1918.68	2339.53	1968.23	1101.08	157.901	49.107	1.10047	0.00372218	29.6416	2556.74	0.0718173	9.72669	0.965778	0.0781335	0.899873	12.3606	6.38863e-10	5.17627e-09	yes
ENSG00000162695	SLC30A7	0.276586	1.38695	2.00705	2.56743	2.34276	4.3686	8.34856	11.9395	10.2407	20.6428	18.9597	19.7991	13.2418	17.7414	18.5447	12.657	5.85446	2.92714	0.0311073	0.00234623	30	20.0757	1.68438	0	1.00254	0.0811122	0.899863	12.3599	6.39433e-10	5.17644e-09	yes
ENSG00000125449	ARMC7	0.215123	0.284502	0.347375	0.381645	0.792934	2.71313	6.01956	6.98424	7.90736	2.82038	3.5505	3.04383	3.07398	1.9069	0.716704	1.53087	0.495936	0.086304	0.0425176	0.00534564	30	3.11708	0.0511991	0.116948	1	0.0809106	0.899855	12.3593	6.39874e-10	5.17644e-09	yes
ENSG00000176058	TPRN	0.430246	0.142251	1.00353	1.80414	1.4417	9.93282	12.1108	27.6248	21.6048	26.0435	33.8954	25.0334	25.4431	26.6001	28.6682	15.9648	2.24986	1.6182	0.0901019	0.00318467	29.6994	31.1295	0.504047	0	1.02125	0.0826554	0.899799	12.3555	6.42923e-10	5.19709e-09	yes
ENSG00000198604	BAZ1A	0.153659	0.675692	1.31231	1.80414	2.41484	3.58685	5.0163	7.25736	5.44441	9.90132	8.18982	7.51001	8.53621	3.88622	5.44247	4.45593	0.641088	0.787524	0.0379057	0.00602016	0	8.23373	0.274129	0.910933	1	0.0809839	0.899691	12.3481	6.48865e-10	5.24107e-09	yes
ENSG00000115307	AUP1	4.48685	7.75267	9.57211	19.5333	34.2764	54.4466	71.7331	145.225	240.029	446.7	452.57	338.235	427.803	398.084	343.189	324.846	247.387	230.378	0.426613	0.000997087	13.0215	410.644	4.48604	8.10546	0.997303	0.0807746	0.899671	12.3467	6.49991e-10	5.2461e-09	yes
ENSG00000101150	TPD52L2	44.346	49.61	68.703	103.634	172.824	357.398	1137.2	1948.17	2716.16	1309.91	1820.1	1371.32	1753.66	1529.12	1464.05	1362.89	731.953	255.258	6.29017	0.00159377	30	1645.77	5.38837e-07	9.99999	1.04235	0.08445	0.899613	12.3428	6.53197e-10	5.26791e-09	yes
ENSG00000163694	RBM47	0.645368	2.31158	2.62461	3.85115	7.24453	10.1168	26.8372	28.4442	23.8085	89.5919	86.0405	109.35	85.1256	99.4968	77.7848	36.4676	1.94746	1.3485	0.113035	0.00392035	30	105.139	2.83249	0	1.0306	0.0835225	0.899559	12.3391	6.56183e-10	5.2856e-09	yes
ENSG00000126351	THRA	1.32147	1.13801	1.85267	2.25518	3.09965	5.70218	22.43	33.7116	32.4936	32.3443	20.1668	33.4252	25.2539	20.0587	23.4049	15.2267	5.61254	3.33709	0.125903	0.00322388	30	28.7298	0.531816	0.713305	1	0.0810447	0.899556	12.3389	6.56402e-10	5.2856e-09	yes
ENSG00000151065	DCP1B	0.153659	0.355627	0.463167	1.11024	0.937104	1.65547	3.08144	3.12145	2.41974	12.7217	11.5746	10.7814	10.0495	11.4656	9.33955	1.69489	0.399168	0.057536	0.013994	0.00520418	29.051	13.2151	0.535325	0	1.02097	0.0827599	0.899522	12.3366	6.58278e-10	5.29663e-09	yes
ENSG00000254553	AL033529.1	0.0614637	0.0355627	0.231583	0.312255	0.792934	1.83941	4.69382	5.03333	3.93207	22.0829	13.4209	20.5672	19.4134	20.0345	9.20517	3.08908	0.54432	0.129456	0.0291386	0.00590876	30	21.8798	0.0821934	0	1.01606	0.0823678	0.899507	12.3356	6.59094e-10	5.29912e-09	yes
ENSG00000151500	THYN1	2.95026	4.69428	3.24217	7.77168	9.51521	30.3503	73.8113	138.202	181.653	100.573	117.119	78.8551	113.312	96.3589	101.772	78.7306	59.0285	38.88	0.407667	0.00141235	30	96.5517	1.12669	9.97944	1.01978	0.0827097	0.899421	12.3297	6.63969e-10	5.3342e-09	yes
ENSG00000143420	ENSA	4.1488	4.40978	7.71944	9.33296	13.3357	24.0963	64.5669	154.16	241.153	122.596	107.912	100.645	87.703	89.6244	93.1715	73.5365	61.109	49.8693	0.444124	0.000945786	30	91.5691	0	9.99998	1.1092	0.0899764	0.899391	12.3277	6.65625e-10	5.34341e-09	yes
ENSG00000007372	PAX6	1.38293	0.889068	1.27371	6.80022	2.45089	11.7722	35.3291	31.2145	27.6974	88.9919	54.4647	43.6377	44.9983	27.3001	16.2602	5.60408	6.3625	0.237336	0.478746	0.0172271	30	77.3074	0	3.3991	1.01517	0.0823703	0.899343	12.3244	6.68347e-10	5.36114e-09	yes
ENSG00000182108	DEXI	0.614637	0.995756	0.617555	1.52658	2.66714	8.1394	24.2574	31.7607	30.2035	38.2851	49.5176	29.0159	28.659	41.8794	35.5216	15.2267	4.37875	1.1723	0.138264	0.00381662	30	42.8035	5.11691e-07	0	1.00673	0.081693	0.899328	12.3234	6.69211e-10	5.36396e-09	yes
ENSG00000040633	PHF23	4.45612	4.12527	4.86325	10.235	22.8509	97.9027	178.831	145.342	127.555	175.643	201.952	154.638	208.652	150.331	78.1207	5.93213	2.76998	4.06708	1.3678	0.00872594	29.949	207.389	1.44688	9.95688	1.01983	0.0827688	0.8993	12.3215	6.7082e-10	5.3722e-09	yes
ENSG00000167566	NCKAP5L	0.0614637	0.142251	0.385972	0.55512	1.15336	2.85109	4.94464	7.02325	6.3086	20.6428	11.6456	12.1753	15.7955	13.469	14.6924	7.38099	1.04026	0.21576	0.0278036	0.00370018	30	17.0015	0.335681	0	1.02079	0.08285	0.899292	12.3209	6.71268e-10	5.3722e-09	yes
ENSG00000138050	THUMPD2	2.82733	3.69852	4.47728	3.43481	3.71237	3.90875	9.17266	14.9049	14.1728	18.9625	14.9831	13.6261	10.1914	15.9552	14.1325	6.88892	3.56832	0.640088	0.0423305	0.00316339	30	16.5537	2.95959	0	1.01883	0.082739	0.899187	12.3137	6.77305e-10	5.4138e-09	yes
ENSG00000266967	AARSD1	2.1205	1.24469	2.20004	5.03078	6.37951	10.5766	25.404	40.5788	52.7589	64.9287	60.5715	47.0798	67.6749	42.1691	34.9617	31.957	20.406	19.7744	0.178128	0.00333901	28.8309	50.0978	0.787441	10	0.987437	0.0801913	0.899183	12.3135	6.77502e-10	5.4138e-09	yes
ENSG00000095906	NUBP2	0.6761	0.284502	1.31231	1.87353	3.46008	5.9321	12.6124	32.8532	52.4997	46.9863	47.3637	36.0992	50.8862	48.9277	42.5767	36.9049	26.5023	19.1379	0.103548	0.00127772	30	40.9772	0	6.14787	1.06486	0.086486	0.899168	12.3125	6.78357e-10	5.41649e-09	yes
ENSG00000176476	SGF29	1.10635	0.284502	0.308778	0.20817	1.29753	3.31094	6.52119	8.03772	15.6419	38.8252	43.9315	35.2743	40.7184	30.2691	36.7983	11.0715	2.7337	1.84115	0.0526025	0.00403372	30	43.3769	0	0	1.02359	0.0831425	0.89915	12.3113	6.79384e-10	5.42055e-09	yes
ENSG00000065268	WDR18	2.21269	2.3827	4.78605	7.91046	16.2912	30.1204	78.3618	158.257	284.146	151.1	139.18	123.005	137.336	140.773	115.837	104.154	92.8489	86.1961	0.465901	0.000627847	30	136.043	0	0	1.0812	0.0878374	0.899117	12.3091	6.81286e-10	5.43158e-09	yes
ENSG00000147316	MCPH1	0.491709	0.533441	0.849139	1.70006	2.09046	2.11532	3.97721	4.29199	4.19133	13.3818	8.26083	8.93236	7.47214	11.6587	6.7415	2.37832	1.39104	0.373984	0.0209797	0.00538998	13.997	11.3036	0.736338	0.231308	0.999779	0.0812525	0.899052	12.3046	6.85092e-10	5.45776e-09	yes
ENSG00000089597	GANAB	23.7864	27.5967	30.376	32.4051	38.7817	80.5662	130.961	206.25	256.233	522.13	502.041	516.967	632.885	565.698	533.609	484.302	342.897	258.671	0.521345	0.000986303	23.5449	570.103	10	0	0.938457	0.0762922	0.898996	12.3008	6.8832e-10	5.4793e-09	yes
ENSG00000128951	DUT	9.61906	8.32167	15.4389	19.7415	28.6177	51.0897	104.232	243.59	302.122	332.324	255.399	354.393	254.691	305.973	279.38	263.392	165.256	60.9306	0.713637	0.00158639	29.7597	310.915	1.04237	9.72266	1.01521	0.0825367	0.898985	12.3001	6.88973e-10	5.48004e-09	yes
ENSG00000155868	MED7	0.33805	0.355627	0.849139	1.21433	2.6311	5.65619	13.0782	18.3775	12.574	40.3254	34.7002	53.2812	37.9282	38.1139	24.1664	2.81571	0.870912	0.474672	0.0954652	0.00595922	29.7848	47.2752	0.248685	0	1.02088	0.083002	0.898977	12.2995	6.89462e-10	5.48004e-09	yes
ENSG00000188223	AD000671.1	0.0614637	0.0355627	0.0385972	0.104085	0.180212	0.919706	2.40066	2.14599	4.10491	5.70076	7.62174	5.40493	5.344	4.97243	3.35955	0.246033	0.568512	0.151032	0.0200456	0.00638073	30	6.87552	0	0	1.0363	0.0842639	0.898958	12.2983	6.90534e-10	5.4844e-09	yes
ENSG00000087365	SF3B2	5.53173	4.80097	4.51587	10.5126	12.9753	32.2817	63.6353	115.064	179.277	167.782	207.988	154.723	193.519	199.356	151.247	146.39	99.9009	86.2716	0.364562	0.0012226	29.8925	178.193	0.0159044	9.98249	0.993877	0.080824	0.898937	12.2968	6.91791e-10	5.48657e-09	yes
ENSG00000133606	MKRN1	0.645368	0.604566	0.926333	2.22048	3.60424	6.39196	21.6059	31.6827	50.4688	30.004	32.8303	45.3445	32.5605	36.4725	33.5283	25.7241	8.83008	4.09225	0.125252	0.00208316	30	37.9528	0	0	1.05427	0.0857378	0.898931	12.2964	6.92149e-10	5.48657e-09	yes
ENSG00000204611	ZNF616	0.153659	0.0711254	0.0385972	0.242865	0.576679	1.65547	2.6873	2.77028	2.80862	4.32058	3.85821	1.47924	0.662088	1.54483	0.089588	0.27337	0.326592	0.039556	0.0560444	0.0227106	30	4.28504	0	0.0171881	1.02623	0.0834598	0.898927	12.2961	6.92383e-10	5.48657e-09	yes
ENSG00000165732	DDX21	19.1152	35.6338	45.0043	78.2719	102.144	164.443	442.008	486.321	404.096	709.655	906.372	786.56	854.283	743.016	679.256	372.111	48.505	16.4913	2.18708	0.00397191	29.812	895.303	0.00136701	9.99071	0.937299	0.0762501	0.898872	12.2924	6.95588e-10	5.50368e-09	yes
ENSG00000166295	ANAPC16	2.21269	1.70701	2.66321	5.62059	6.7039	11.4503	29.0229	65.6674	103.444	82.271	103.178	96.35	89.8784	100.221	88.0202	74.466	56.4641	56.9714	0.190334	0.000934672	29.8504	85.5531	0.0474056	10	1.02316	0.0832351	0.898872	12.2924	6.95595e-10	5.50368e-09	yes
ENSG00000099940	SNAP29	0.215123	0.39119	1.04212	0.312255	0.360424	1.8854	4.33552	9.79354	9.72216	62.7084	35.9784	38.6595	37.7863	44.7519	40.6282	22.2797	6.07219	2.81926	0.0373641	0.00347982	30	49.9573	0	0	1.01671	0.0827224	0.898846	12.2907	6.97114e-10	5.51153e-09	yes
ENSG00000162704	ARPC5	2.58147	2.31158	3.97551	3.78176	5.37032	12.554	30.062	50.9966	45.6726	187.645	185.431	236.992	196.191	197.69	212.122	160.058	68.4513	23.6689	0.130807	0.00210082	10.5686	213.381	3.5388	6.7003	1.0704	0.087099	0.898828	12.2894	6.98208e-10	5.516e-09	yes
ENSG00000094916	CBX5	1.38293	0.92463	1.23511	2.25518	2.66714	9.93282	20.7102	40.1886	47.833	110.055	76.2174	112.65	90.4459	81.2244	105.154	72.0877	40.9692	16.3654	0.123857	0.00186231	30	103.601	0.451872	0	1.02002	0.0830271	0.898768	12.2854	7.01742e-10	5.53974e-09	yes
ENSG00000140443	IGF1R	0.553173	1.56476	3.16497	8.18802	9.15478	19.7737	36.6548	30.2	24.4566	72.4897	47.7187	61.8153	50.5315	51.1726	39.9339	12.575	4.37875	2.89118	0.210702	0.0065387	5.44704	65.4872	0.558263	2.76024	1.00007	0.0814217	0.898726	12.2825	7.04245e-10	5.5553e-09	yes
ENSG00000100162	CENPM	2.45855	2.31158	1.73687	3.12255	4.68552	5.28831	10.1401	30.317	44.0738	41.4655	44.902	39.968	46.488	38.0174	27.5259	25.0134	21.6518	16.5704	0.0909811	0.00145135	30	42.067	0.69405	0	1.01313	0.0825249	0.898638	12.2767	7.09445e-10	5.58839e-09	yes
ENSG00000185379	RAD51D	0.0307318	1.03132	1.58249	3.15725	4.32509	5.47225	14.4398	19.392	17.0678	74.95	49.778	80.5904	72.0257	56.8933	64.033	32.531	8.83008	4.30801	0.0670963	0.0032427	29.8413	74.8469	1.52741	0	1.02045	0.083122	0.898637	12.2766	7.09509e-10	5.58839e-09	yes
ENSG00000119333	WDR34	1.53659	1.45807	1.54389	2.56743	5.29824	8.00144	15.8372	26.5713	53.7095	66.0088	60.8792	47.2505	53.0853	47.6243	45.6899	47.2657	28.6554	16.3402	0.108728	0.00163866	30	52.3652	0.417964	5.15059	1.0392	0.0846672	0.898598	12.274	7.11844e-10	5.60255e-09	yes
ENSG00000171302	CANT1	1.3522	1.13801	2.93339	5.27364	4.18092	23.5905	40.3812	57.5517	39.4504	466.502	413.491	447.272	386.447	531.205	328.945	163.011	14.2491	3.45216	0.24223	0.00428171	29.9877	491.219	0.0187092	9.98633	0.996532	0.0811984	0.898581	12.2728	7.12876e-10	5.60645e-09	yes
ENSG00000143545	RAB13	0.737564	0.497878	0.385972	1.45719	3.17174	3.77079	15.5505	42.5687	74.2341	145.819	135.345	105.994	112.46	94.7899	93.8434	63.0118	46.2672	34.1836	0.186574	0.00268188	29.9605	117.674	0	9.99994	1.02603	0.0836211	0.89854	12.27	7.15369e-10	5.62183e-09	yes
ENSG00000167074	TEF	0	0.142251	0.308778	0.34695	1.00919	3.127	4.65799	9.83256	14.5184	3.96053	3.64518	3.755	3.12127	3.6207	2.41888	0.984132	0.774144	0.28768	0.0335922	0.0017335	30	3.44278	0	0	1.15021	0.0937566	0.89851	12.268	7.17152e-10	5.63161e-09	yes
ENSG00000163608	NEPRO	1.59806	1.17357	3.24217	3.67767	9.33499	10.8065	47.6907	61.0243	71.6847	93.4925	97.189	147.896	105.012	117.528	93.4179	49.8354	16.0635	8.02627	0.253275	0.00315225	29.9792	122.027	1.07992	0	1.02497	0.0835815	0.898436	12.2631	7.2163e-10	5.66252e-09	yes
ENSG00000136856	SLC2A8	2.58147	2.13376	4.1685	5.62059	8.65019	17.1985	59.7298	115.142	184.419	72.3096	100.384	68.8702	88.1286	71.6657	71.4688	63.4765	37.0863	20.3857	0.371	0.00128891	30	82.214	0	0	1.10034	0.0897458	0.8984	12.2606	7.23841e-10	5.67561e-09	yes
ENSG00000186432	KPNA4	0.33805	0.462315	1.73687	3.43481	5.55054	8.00144	19.7786	38.0426	48.5244	95.9528	63.5303	84.1747	56.4903	83.252	68.5796	56.7789	23.9864	10.8527	0.148033	0.00276141	29.8128	73.9664	0.00556688	9.80754	1.03195	0.0842042	0.898321	12.2553	7.28669e-10	5.70918e-09	yes
ENSG00000119541	VPS4B	0.430246	0.604566	0.656153	1.00616	1.47774	2.39124	6.4137	6.24289	4.83948	28.2038	20.0248	25.773	20.4065	17.2587	19.2166	5.08468	0.883008	0.632896	0.0306562	0.00527891	28.5492	26.5897	0.621065	0	1.01006	0.0824385	0.898276	12.2523	7.31426e-10	5.72649e-09	yes
ENSG00000162714	ZNF496	0.122927	0.106688	0.69475	2.28987	1.694	8.41531	17.7004	15.8413	16.2036	18.2424	26.108	17.8078	18.7276	22.9552	14.5133	6.01414	0.749952	0.729988	0.0959826	0.00524271	29.8937	23.6411	0.609897	0.272156	1.00006	0.0816346	0.898249	12.2505	7.33107e-10	5.73536e-09	yes
ENSG00000103415	HMOX2	0.614637	0.284502	2.7404	2.46335	1.40566	12.0022	30.062	97.038	88.8822	108.194	112.219	81.4438	96.4047	117.793	90.1479	77.0083	28.3046	7.64869	0.291474	0.00261302	29.9828	101.577	0.00190585	9.99995	1.0807	0.0882378	0.898205	12.2476	7.35796e-10	5.75209e-09	yes
ENSG00000178921	PFAS	1.04488	1.56476	2.779	1.87353	4.61343	6.52991	17.2704	32.385	41.1355	25.2034	35.505	32.5434	33.4591	35.9415	32.2293	22.7991	16.753	11.5827	0.089931	0.00137194	30	33.9651	1.20961	0	1.01284	0.0827429	0.898104	12.2408	7.42099e-10	5.79274e-09	yes
ENSG00000213799	ZNF845	0.0614637	0.213376	1.23511	1.59597	1.98233	6.34597	10.0684	9.83256	9.72216	43.0857	18.3206	17.0398	11.2318	7.67588	2.32929	1.4762	0.737856	0.172608	0.285865	0.0340635	30	39.1358	0	1.24255	1.01433	0.0828654	0.898103	12.2407	7.42105e-10	5.79274e-09	yes
ENSG00000184916	JAG2	1.29074	1.84926	2.779	4.37157	3.38799	13.2438	16.7688	45.339	49.8639	12.4817	17.4685	15.9303	20.0518	16.6069	13.8861	8.85719	3.70138	1.73327	0.134015	0.00205855	30	17.0049	1.16255	0	1.07866	0.0882233	0.89789	12.2265	7.55492e-10	5.89284e-09	yes
ENSG00000115657	ABCB6	1.93611	3.37846	3.24217	4.96139	11.6778	33.0174	49.6972	76.0462	101.888	106.634	110.823	85.4832	98.1309	72.0761	79.2182	67.003	53.8151	45.3492	0.233847	0.00158099	16.4991	88.4805	2.65684	10	0.974291	0.0797057	0.897847	12.2236	7.58252e-10	5.90995e-09	yes
ENSG00000108984	MAP2K6	1.22927	0.746817	1.08072	2.46335	2.95548	5.24232	14.9772	23.723	20.2221	39.5453	39.1975	46.3402	25.3249	39.5139	36.7983	23.3731	7.8624	3.12492	0.0750932	0.00284255	30	42.3701	1.08584	0	1.01484	0.0830402	0.897808	12.2211	7.6068e-10	5.92446e-09	yes
ENSG00000188517	COL25A1	1.01415	2.13376	2.31583	6.17571	6.95619	20.2335	35.7949	47.3679	39.9257	60.068	37.659	43.1825	33.9084	29.9553	37.515	24.8493	10.4751	3.07818	0.251234	0.00555808	27.3026	41.6418	1.57406	7.47084	1	0.0818397	0.897778	12.219	7.62616e-10	5.93512e-09	yes
ENSG00000090863	GLG1	1.75171	0.746817	1.85267	1.94292	2.81131	4.32262	17.5212	19.5481	32.9257	67.629	45.7304	59.6534	41.1204	41.2518	45.6675	28.0751	17.2852	9.63728	0.0960384	0.00294469	29.8617	53.5175	0.476126	3.01126	0.999438	0.0818183	0.897722	12.2153	7.66167e-10	5.95534e-09	yes
ENSG00000122376	FAM35A	0.921955	1.13801	2.23864	3.12255	5.91096	8.46129	24.7232	51.5819	57.728	83.4111	62.8202	63.6075	71.269	92.4968	77.3592	48.5505	16.0877	5.79675	0.172987	0.00242522	29.9466	81.9493	0.0507581	0	1.03463	0.0847048	0.897711	12.2146	7.66914e-10	5.95534e-09	yes
ENSG00000153443	UBALD1	0.460977	1.06688	1.3509	3.4695	7.02828	16.0949	9.49514	29.0685	24.1974	101.414	69.4715	75.5552	84.0615	62.0347	55.2086	32.121	5.68512	1.99578	0.116971	0.00465979	29.3603	90.6091	1.85059	0	1.00865	0.0825776	0.897711	12.2145	7.66924e-10	5.95534e-09	yes
ENSG00000119402	FBXW2	1.32147	1.84926	2.20004	3.71237	6.01909	12.0941	40.5962	57.0444	43.1664	57.3076	67.7672	75.669	70.2523	66.7898	63.8091	37.9711	8.63654	1.89509	0.190473	0.0031627	27.4119	75.3121	1.58529	0	1.01981	0.083498	0.897697	12.2136	7.67809e-10	5.95779e-09	yes
ENSG00000109685	NSD2	8.69711	15.3987	28.5619	41.9463	41.7732	98.3166	244.509	303.795	297.196	177.984	125.83	117.116	92.4086	80.3795	108.334	68.5065	29.7562	14.7544	1.56909	0.00497809	27.5803	133.365	10	10	0.961055	0.0787181	0.897624	12.2088	7.72468e-10	5.98949e-09	yes
ENSG00000110108	TMEM109	2.58147	3.9119	3.24217	4.75322	7.49683	17.9343	64.9252	122.595	126.345	153.14	208.462	200.039	184.959	182.821	176.376	171.676	83.8374	41.3073	0.341543	0.00171921	29.9089	189.666	0.0326962	9.99943	1.01713	0.0833271	0.89759	12.2065	7.74721e-10	6.00251e-09	yes
ENSG00000113643	RARS	2.15123	2.24045	3.08778	4.1981	6.48764	11.1744	42.0294	66.4088	69.1354	610.821	440.57	666.03	537.686	496.929	565.278	445.62	217.813	68.5577	0.203466	0.00200395	29.9796	595.355	0.0149331	7.66347	1.00559	0.0823937	0.897563	12.2047	7.76466e-10	6.01157e-09	yes
ENSG00000143498	TAF1A	0	0.0711254	1.04212	0.90207	1.4417	2.11532	5.51793	3.94083	6.99996	57.8477	35.576	34.2217	29.0609	30.9449	15.5435	4.59262	1.30637	0.294872	0.0598079	0.0115592	29.3068	50.0103	0.131819	1.26999	1.00003	0.0819574	0.897519	12.2018	7.79284e-10	6.02892e-09	yes
ENSG00000155744	FAM126B	0.368782	2.84502	6.56153	6.90431	8.14559	21.0613	40.5245	32.6581	33.5739	281.798	144.813	112.65	80.6092	92.183	31.2438	3.28044	0.314496	0.604128	0.828281	0.0270595	30	253.884	0.561621	8.47461	0.996558	0.0817251	0.897401	12.194	7.86975e-10	6.08392e-09	yes
ENSG00000146963	LUC7L2	25.4767	31.4019	50.1764	77.4046	97.8192	211.394	554.158	754.61	592.361	312.762	310.266	375.102	308.391	314.88	313.916	210.44	47.3316	10.3169	3.20122	0.00425177	19.6166	370.614	5.00533	10	0.945069	0.0775595	0.897266	12.1851	7.95886e-10	6.14462e-09	yes
ENSG00000167657	DAPK3	0.553173	0.640129	1.85267	2.98377	4.10884	14.2554	19.7069	33.7897	18.5801	61.5682	51.6006	36.3553	40.1036	44.1243	34.6706	17.6597	1.4999	0.28768	0.143478	0.00538293	29.8251	55.6716	1.30916	0	1.0019	0.0822244	0.897264	12.185	7.96002e-10	6.14462e-09	yes
ENSG00000087448	KLHL42	2.64294	2.06264	2.93339	3.29603	5.29824	10.1168	22.6092	19.0408	16.9814	70.3894	36.7122	51.4606	43.2722	34.0829	32.9012	6.15083	1.39104	0.91698	0.13946	0.00773609	30	59.4336	2.26015	0.447342	1	0.0820886	0.897219	12.182	7.9901e-10	6.16329e-09	yes
ENSG00000102805	CLN5	1.01415	0.995756	3.28076	3.36542	3.92863	6.48393	26.4431	35.6235	38.9319	180.684	136.505	173.612	107.849	148.473	108.379	78.4845	51.3596	50.7468	0.129321	0.00274838	9.35784	149.749	0	9.88473	0.978007	0.0803273	0.897118	12.1753	8.05773e-10	6.21087e-09	yes
ENSG00000134262	AP4B1	0.829759	0.213376	0.463167	1.97762	3.02757	4.55254	5.58959	8.66201	8.29624	26.1035	30.3213	37.2087	31.7802	25.0552	22.3746	21.7329	3.59251	1.15432	0.0274277	0.00295998	27.1476	32.9006	1.20109	0	1.02976	0.0845826	0.897108	12.1747	8.06401e-10	6.21113e-09	yes
ENSG00000108100	CCNY	11.4322	15.7187	17.5231	23.7314	27.1039	32.3736	61.9155	65.5504	79.7649	121.696	152.908	146.331	128.54	154.773	140.116	113.503	46.11	17.3327	0.199405	0.00206391	0	153.623	10	0	0.959227	0.0788325	0.897006	12.1679	8.13293e-10	6.2596e-09	yes
ENSG00000112249	ASCC3	0.645368	0.889068	1.46669	2.42865	3.13569	3.90875	17.9512	23.0987	26.7467	30.6641	15.0541	21.7051	15.7246	19.2138	13.9981	9.40393	2.1289	1.50672	0.113077	0.00412596	30	23.2381	0.234302	0	1.01017	0.0830377	0.896964	12.1652	8.16109e-10	6.27665e-09	yes
ENSG00000117713	ARID1A	3.71855	8.07274	10.1125	13.3923	25.446	61.1145	134.294	155.37	114.16	90.372	65.0688	102.807	70.4887	61.2622	63.2267	15.9375	1.31846	1.17949	0.969901	0.00709962	27.112	82.4043	5.75096	10	1.06479	0.0876355	0.896737	12.1502	8.31666e-10	6.3916e-09	yes
ENSG00000181789	COPG1	0.491709	0.497878	1.23511	0.90207	2.45089	3.127	5.37461	7.25736	8.68513	5.04067	4.2606	5.12046	5.58046	4.56208	3.65071	4.04588	2.60064	2.16479	0.0290198	0.00339707	30	3.05827	0.861017	2.10323	1.00001	0.0823273	0.896683	12.1467	8.3533e-10	6.41504e-09	yes
ENSG00000080802	CNOT4	0.122927	2.13376	10.2669	9.88808	18.3456	28.4189	61.1272	73.354	65.1601	61.3882	40.4994	72.2838	32.0167	48.976	28.2202	6.45153	0.749952	0.830676	0.472627	0.00671962	19.3079	61.1452	1.1283	0	1.01165	0.0832986	0.896656	12.1449	8.37259e-10	6.42513e-09	yes
ENSG00000144867	SRPRB	1.96684	2.27601	2.62461	6.21041	8.25372	21.843	66.6451	159.818	247.548	291.759	289.176	300.742	224.85	304.211	279.671	250.188	170.336	140.999	0.4617	0.00115543	29.6413	288.462	0.615103	9.99824	1.00008	0.0823537	0.896637	12.1437	8.38566e-10	6.43044e-09	yes
ENSG00000109332	UBE2D3	20.5903	23.7559	37.6709	66.2328	89.6376	193.69	722.992	1132.27	970.92	1727.57	1986.93	2114.15	1921.9	1992.35	1933.02	1390.91	569.008	212.905	3.47564	0.00264681	9.47204	2318.12	9.88667	9.78925	0.952566	0.0784532	0.896609	12.1418	8.40492e-10	6.4402e-09	yes
ENSG00000102401	ARMCX3	0.921955	0.853505	2.08425	5.27364	7.42474	12.554	50.2705	93.9945	78.8143	180.564	139.629	125.167	87.2537	141.062	124.303	82.3664	16.8013	9.98969	0.330368	0.0033171	30	153.315	0	0	1.01986	0.0839996	0.896601	12.1413	8.41071e-10	6.4402e-09	yes
ENSG00000132475	H3F3B	18.4084	23.9337	33.6954	52.7364	69.9584	135.841	455.552	708.139	648.058	960.668	1103.38	1228.11	1230.54	1117.69	1143.05	889.382	270.527	75.0989	2.21482	0.00234575	29.9964	1232.74	0.00032863	9.98214	1.00155	0.0825206	0.896535	12.137	8.45665e-10	6.47001e-09	yes
ENSG00000125971	DYNLRB1	1.53659	1.70701	1.54389	1.24902	2.30672	6.02407	8.49188	19.8992	27.1788	25.3834	34.0611	29.272	26.1052	29.4242	30.6391	23.5645	19.0391	10.6154	0.050566	0.00109272	30	29.9252	1.23527	0.397545	1.0604	0.0873729	0.896527	12.1365	8.46202e-10	6.47001e-09	yes
ENSG00000078369	GNB1	13.2762	13.6561	15.2845	22.5865	25.6262	52.8371	106.632	243.122	284.406	430.257	353.488	508.974	398.884	387.994	438.085	356.092	226.8	98.8289	0.654921	0.00147745	30	448.612	7.19	0	1.0152	0.0836972	0.896419	12.1294	8.5379e-10	6.52326e-09	yes
ENSG00000130544	ZNF557	0	0.711254	2.47022	4.33688	5.58658	11.6803	23.3975	23.84	31.543	50.1667	23.3623	24.3506	15.9374	16.269	6.58472	3.00707	0.471744	0.974516	0.424522	0.0178334	30	41.5861	0	0.552993	1.01032	0.0833108	0.896383	12.1271	8.56307e-10	6.53771e-09	yes
ENSG00000151413	NUBPL	1.93611	2.48939	2.62461	2.39396	2.91944	4.50656	5.84041	7.3354	8.81476	92.5923	52.8788	72.2554	65.263	59.5484	55.7685	53.0611	25.6314	15.9159	0.0198947	0.00243307	0	67.6822	1.99593	6.39682	1.00553	0.0829228	0.896368	12.1261	8.57393e-10	6.54122e-09	yes
ENSG00000169692	AGPAT2	1.19854	1.28026	2.66321	2.70621	4.32509	8.96713	22.9675	46.1584	72.2897	110.235	107.083	101.044	134.569	94.983	109.611	85.6468	65.3305	44.5257	0.148284	0.0013348	29.7897	104.896	0.00454964	9.99716	1.01876	0.0840938	0.896192	12.1146	8.69956e-10	6.62931e-09	yes
ENSG00000099800	TIMM13	5.04002	4.37421	4.0913	11.1718	20.0396	48.1926	114.013	308.594	589.206	492.306	536.244	370.551	519.29	430.332	412.463	377.36	229.28	149.896	1.10519	0.00135286	30	476.934	0	8.83873	1.08711	0.089737	0.896188	12.1144	8.70207e-10	6.62931e-09	yes
ENSG00000179151	EDC3	0.399514	0	0.463167	0.312255	1.26149	2.98904	5.44627	9.94961	14.5184	34.5046	58.7963	37.2371	40.009	45.5967	34.5362	25.2867	9.42278	3.04222	0.0426609	0.00282546	30	46.8794	0	0	1.02641	0.0847464	0.896145	12.1115	8.7332e-10	6.64817e-09	yes
ENSG00000179335	CLK3	0.368782	1.77814	2.54742	2.28987	6.01909	7.54159	12.6482	16.7388	12.3147	33.8445	34.7476	43.0972	39.3942	37.4863	27.4139	14.2699	2.02003	0.726392	0.0582796	0.00401666	29.7107	41.8306	2.36498	0	1.0237	0.0845642	0.896053	12.1056	8.79899e-10	6.69338e-09	yes
ENSG00000135974	C2orf49	0.0921955	0.320064	0.501764	1.3878	1.87421	2.25328	6.27037	6.71111	4.88269	12.7817	7.74009	10.7814	4.51639	5.98622	3.22517	0.902121	0.374976	0	0.0669085	0.0121275	30	11.5609	0.214893	0.158678	1	0.0826243	0.896013	12.103	8.82828e-10	6.71078e-09	yes
ENSG00000141696	P3H4	0.368782	1.13801	0.771944	1.90823	2.48693	10.8525	23.29	56.3031	83.8698	618.863	365.228	422.865	400.989	382.032	348.475	274.19	139.285	71.9164	0.233713	0.0028055	29.9975	470.835	0.0137543	9.99786	1.02169	0.0844336	0.895976	12.1006	8.85544e-10	6.72653e-09	yes
ENSG00000079999	KEAP1	2.21269	3.09396	4.05271	6.86961	9.83959	21.6591	59.694	75.7731	57.7712	86.8916	79.6732	70.4348	97.8944	77.0485	79.7109	36.4129	9.12038	2.18996	0.325571	0.00445448	28.696	84.0853	2.6539	9.99919	1.03511	0.0855502	0.895959	12.0994	8.86792e-10	6.73111e-09	yes
ENSG00000001617	SEMA3F	1.29074	1.49363	3.58954	6.2451	14.0566	18.624	34.9349	33.9457	35.259	92.1723	78.466	70.7477	71.1508	52.9346	73.9101	44.2859	9.83405	1.54268	0.135255	0.00348829	27.9439	84.8064	5.1077	0	1.0134	0.0837649	0.895938	12.0981	8.88304e-10	6.7377e-09	yes
ENSG00000171729	TMEM51	1.13708	5.15659	4.51587	6.48797	13.8403	22.8087	51.2379	42.9199	31.6294	196.466	197.029	204.022	194.11	162.111	94.3138	10.3607	1.00397	0.86304	0.288167	0.00702138	20.7144	227.306	3.09119	0	1.0203	0.0843468	0.895913	12.0965	8.90128e-10	6.74664e-09	yes
ENSG00000213853	EMP2	1.41366	1.5292	2.27724	1.63067	4.28905	7.95546	25.619	53.5328	73.802	197.006	142.517	115.466	127.807	158.056	135.995	112.3	48.4687	20.7957	0.200022	0.00247409	28.295	152.357	0.31512	9.99357	1.04711	0.0866035	0.895826	12.0908	8.96525e-10	6.7902e-09	yes
ENSG00000153767	GTF2E1	0.122927	0.284502	0.231583	0.6939	0.901061	2.62116	8.24106	6.08682	4.40738	50.7668	51.2929	47.1651	39.1578	34.7346	20.4709	5.85012	0.592704	0.309256	0.0495396	0.0079346	30	55.3275	0.114654	0	1.00776	0.0833674	0.895785	12.0882	8.99526e-10	6.808e-09	yes
ENSG00000122417	ODF2L	0.276586	1.13801	2.23864	3.92054	2.70318	8.27735	17.4496	27.4687	21.432	39.6053	24.0487	35.9286	18.3256	17.7656	13.4158	8.22844	3.06029	1.15072	0.185963	0.00819381	30	32.932	0.23515	1.45966	1	0.0827333	0.895767	12.087	9.00851e-10	6.8131e-09	yes
ENSG00000145901	TNIP1	1.47513	2.70277	2.7018	5.82876	12.4346	27.3153	52.9578	95.5943	134.684	163.762	110.302	88.015	112.579	95.852	103.161	87.2597	32.8406	16.0274	0.365838	0.00233455	30	125.506	6.38069e-07	0	1.02098	0.0844762	0.89575	12.0859	9.02085e-10	6.81749e-09	yes
ENSG00000188938	FAM120AOS	2.39708	2.02707	2.58601	5.5859	6.95619	11.6343	48.1206	90.639	105.086	74.4699	117.143	113.276	92.4795	83.4451	95.7248	66.3742	38.5379	15.9662	0.283447	0.00196893	30	103.794	0	0	1.02375	0.0847282	0.895701	12.0828	9.05738e-10	6.84015e-09	yes
ENSG00000149428	HYOU1	5.04002	4.97878	3.70533	8.3268	11.3894	20.0496	28.9512	41.6713	57.5984	98.7732	69.7082	84.4022	64.4826	64.376	61.1886	49.0973	39.5176	30.8717	0.135191	0.00205013	29.9444	71.5237	5.68053	8.9944	0.973113	0.0805463	0.89568	12.0814	9.07287e-10	6.84643e-09	yes
ENSG00000196072	BLOC1S2	6.761	6.97029	9.7265	16.9312	21.0488	56.9298	126.124	214.326	230.264	95.9528	146.162	146.787	105.603	127.159	115.927	98.5225	37.7879	12.0969	0.688647	0.00232149	30	136.404	6.605	0	1.00888	0.0835102	0.895672	12.0809	9.07879e-10	6.84643e-09	yes
ENSG00000186314	PRELID2	0.33805	0.284502	0.540361	1.07555	1.51378	1.33357	2.72313	3.6677	3.97528	90.012	57.6128	46.5108	39.2051	52.5967	46.6082	27.6377	5.33434	1.59303	0.0180364	0.00507901	20.1638	67.1476	0.416809	1.46619	1.00007	0.0827885	0.895656	12.0799	9.09063e-10	6.84662e-09	yes
ENSG00000158195	WASF2	0.737564	1.38695	1.69828	2.7756	4.14488	11.1744	20.2085	45.9243	66.3267	41.1655	45.3991	39.2284	53.1089	36.5208	46.0482	36.0302	18.9786	7.49766	0.147862	0.00157924	30	46.3491	0	0	1.05458	0.0873017	0.895654	12.0797	9.09214e-10	6.84662e-09	yes
ENSG00000166012	TAF1D	8.23613	28.3435	69.089	102.558	156.424	188.724	403.418	611.491	595.385	192.626	146.565	179.074	90.044	123.031	73.9101	65.7728	42.844	24.8232	2.6384	0.00401074	5.97168	154.962	3.28136	6.409	0.988404	0.0818326	0.895633	12.0784	9.10799e-10	6.85361e-09	yes
ENSG00000143401	ANP32E	8.63564	7.43261	8.2984	15.0576	19.499	37.9379	108.209	172.577	161.258	454.381	488.928	549.084	460.837	588.315	500.17	400.542	142.406	59.165	0.525569	0.00217933	29.9911	542.867	0.0224126	9.96648	0.988168	0.0818783	0.895484	12.0688	9.21975e-10	6.93272e-09	yes
ENSG00000099783	HNRNPM	30.2401	25.8897	35.8954	38.1992	63.651	106.962	292.307	442.153	550.188	754.121	718.716	673.938	682.589	902.737	689.357	562.158	385.85	350.491	1.2607	0.0012589	29.3808	763.257	0.336325	9.9693	0.944615	0.0782812	0.895456	12.0669	9.24103e-10	6.94244e-09	yes
ENSG00000167965	MLST8	7.09905	11.8779	10.8072	18.77	18.1294	34.535	67.72	145.772	228.233	539.412	447.955	322.361	350.315	433.253	338.62	275.885	156.268	123.087	0.555521	0.0021285	29.2419	435.965	0.206511	9.67972	0.987648	0.0818503	0.895449	12.0665	9.24596e-10	6.94244e-09	yes
ENSG00000174780	SRP72	3.3805	2.34714	4.86325	5.72468	6.66785	9.88684	24.1857	38.2377	45.3269	48.4265	45.8251	46.5108	55.4499	47.9863	35.2753	34.964	33.2035	22.4139	0.102066	0.00152685	17.7538	39.2681	2.86355	10	0.989039	0.0819977	0.895376	12.0618	9.30156e-10	6.97918e-09	yes
ENSG00000131263	RLIM	0.460977	1.5292	2.779	5.65529	6.66785	16.8306	55.8959	59.3075	53.5367	74.1699	50.9378	89.1813	50.7443	48.6863	44.6596	11.5089	1.85069	1.38086	0.369308	0.00604771	30	75.1438	2.85081e-07	0	1.00457	0.0833028	0.895338	12.0593	9.3309e-10	6.99617e-09	yes
ENSG00000151748	SAV1	0.153659	0.284502	0.656153	0.62451	0.865019	2.71313	12.9349	16.3096	16.2468	113.235	69.4715	122.18	73.4681	63.0726	64.5034	13.3678	2.00794	0.122264	0.101791	0.00632728	30	107.249	0	0	1.04	0.08625	0.895316	12.0579	9.34732e-10	7.00346e-09	yes
ENSG00000090432	MUL1	0.215123	0.711254	1.3895	4.40627	6.73994	14.9452	25.1173	39.6033	56.7774	26.0435	35.0316	32.7425	43.6032	30.6553	29.9	10.7161	1.75392	0.830676	0.183587	0.00319189	25.603	36.316	5.65671e-06	0	1.05328	0.0873635	0.89529	12.0562	9.36735e-10	7.01343e-09	yes
ENSG00000168118	RAB4A	1.22927	1.13801	0.308778	2.7756	2.95548	7.8175	17.7004	45.6512	58.5922	23.7632	32.6646	29.6987	28.4698	33.2139	29.2057	23.2365	17.3457	6.9259	0.125846	0.00127524	30	30.8275	0	0	1.06243	0.0881793	0.89517	12.0486	9.45909e-10	7.07705e-09	yes
ENSG00000108592	FTSJ3	0.0307318	0.106688	0.424569	0.589815	2.01838	2.94306	5.12379	9.87157	15.1234	35.4047	25.1849	24.8627	31.3782	34.0346	29.4521	24.8493	12.3621	4.46264	0.035588	0.00183939	29.9936	32.5916	0.00342452	0	1.02001	0.0846769	0.895128	12.0458	9.49186e-10	7.09649e-09	yes
ENSG00000108219	TSPAN14	0.399514	1.10244	0.771944	3.01847	3.96467	9.01312	18.1662	15.2171	15.469	197.186	104.29	129.263	119.152	106.038	96.5759	48.8512	4.40294	1.0752	0.0927198	0.00551254	29.9285	157.452	1.4706	0	1.00382	0.0833438	0.895104	12.0443	9.51069e-10	7.10111e-09	yes
ENSG00000139719	VPS33A	0.737564	1.13801	2.7018	4.51035	7.02828	10.3467	23.29	47.6801	72.16	96.6729	102.893	100.674	101.512	95.5382	120.205	82.339	24.8694	7.32505	0.17772	0.00209615	30	111.394	0.0485024	0	1.04541	0.086798	0.895103	12.0442	9.51163e-10	7.10111e-09	yes
ENSG00000111676	ATN1	0.368782	0.0355627	0.385972	0.242865	0.720849	2.25328	6.01956	17.363	23.2468	8.94119	8.9946	8.24963	6.88099	6.63795	7.86135	6.99827	1.28218	0.84506	0.0511684	0.0015101	30	8.26307	0	0	1.16847	0.0970539	0.895028	12.0394	9.56947e-10	7.13919e-09	yes
ENSG00000091651	ORC6	0.6761	1.20913	2.779	5.62059	8.72227	18.3481	56.8992	90.1318	66.0243	229.111	153.358	214.462	122.817	198.366	147.641	58.0365	9.30182	4.8582	0.412201	0.00504284	29.9956	202.658	0.00147441	9.99998	1.03194	0.0858027	0.894832	12.0269	9.72313e-10	7.24865e-09	yes
ENSG00000027847	B4GALT7	1.07561	1.17357	0.69475	1.3878	1.94629	4.6905	9.31598	18.7677	25.6665	59.4079	78.182	50.1805	66.8472	65.6554	61.5917	56.5329	30.24	15.8763	0.057228	0.00154918	30	68.5267	0.480663	0	1.02002	0.0848939	0.894649	12.0152	9.86893e-10	7.3521e-09	yes
ENSG00000137547	MRPL15	5.04002	4.33865	7.56505	10.6861	14.2007	23.3605	79.9025	111.28	90.6105	213.148	297.106	202.6	233.291	254.559	186.903	164.514	54.432	17.5701	0.343282	0.00283431	28.0222	253.973	6.90349	6.90301	1.02955	0.0857289	0.894557	12.0094	9.94299e-10	7.39706e-09	yes
ENSG00000186205	MARC1	4.54831	4.97878	7.79664	8.3615	10.9209	21.2452	56.29	112.528	113.555	180.744	215.492	207.578	175.548	229.963	218.64	157.488	95.1108	33.3493	0.32001	0.00185382	29.9892	209.321	0.01154	9.99653	0.997536	0.0830634	0.894557	12.0093	9.94343e-10	7.39706e-09	yes
ENSG00000081026	MAGI3	0.245855	0.462315	0.849139	1.59597	2.6311	1.8854	6.4137	7.41343	6.00614	13.0817	12.5451	14.1666	6.64453	10.4759	7.23423	3.82718	1.43942	0.2697	0.0381969	0.00591927	29.9998	13.0244	0.700094	0.470686	1	0.0832764	0.894539	12.0082	9.95768e-10	7.40239e-09	yes
ENSG00000122786	CALD1	6.79173	10.0287	14.1266	21.8926	32.6184	63.0458	169.408	320.846	407.121	673.35	414.675	613.915	429.624	451.477	468.814	402.729	219.506	93.719	1.07383	0.00203112	29.9653	550.118	0.023706	9.97703	1.01103	0.0842214	0.89448	12.0044	1.00057e-09	7.43278e-09	yes
ENSG00000100941	PNN	0.952687	1.63588	2.7404	6.939	6.99224	15.727	59.1565	87.4005	74.5366	70.3894	50.2041	77.3189	47.0082	46.6346	57.7395	27.2277	5.84237	3.16808	0.359339	0.00392429	30	67.8642	4.30071e-08	0	1.00037	0.0833831	0.894367	11.9972	1.00977e-09	7.4958e-09	yes
ENSG00000241978	AKAP2	0.983419	4.12527	4.32289	5.41242	8.90248	17.2905	71.4106	84.4741	74.5366	98.1131	62.8202	92.7372	56.5849	61.6243	70.7745	30.5081	6.42298	1.65056	0.398467	0.0044943	29.9877	87.9984	1.02489	0.0126706	0.999983	0.0833707	0.894322	11.9944	1.01341e-09	7.51752e-09	yes
ENSG00000197780	TAF13	1.47513	1.10244	1.54389	1.97762	3.64029	7.31166	16.2671	37.6134	31.9319	47.7664	38.9608	60.905	38.6376	46.3932	44.7044	21.1315	3.71347	1.23343	0.13212	0.00339038	30	52.1647	4.56465e-07	0	1.02596	0.0855521	0.894288	11.9922	1.01623e-09	7.53147e-09	yes
ENSG00000242259	C22orf39	4.8249	3.23621	4.32289	4.37157	4.10884	7.31166	14.8339	21.4209	26.2714	14.2219	21.303	19.6	19.106	12.2621	16.2826	10.8528	4.64486	3.94481	0.0643374	0.00226009	30	18.7177	3.47086	0	1.01211	0.0843998	0.894282	11.9919	1.01673e-09	7.53147e-09	yes
ENSG00000135250	SRPK2	0.33805	1.31582	0.733347	1.76945	2.8834	2.34525	14.6189	14.2026	17.7591	14.4619	18.3206	22.018	17.7581	17.2828	11.6016	8.77518	4.89888	0.9889	0.0623163	0.00319532	29.195	19.3199	0.713196	0	1.00211	0.0836674	0.894051	11.9773	1.03584e-09	7.66651e-09	yes
ENSG00000023902	PLEKHO1	0.430246	1.63588	1.92986	5.62059	6.7039	17.2445	32.391	31.9558	22.685	12.3616	15.5749	10.5254	12.154	9.36554	8.10771	4.81131	0.556416	0.3596	0.297355	0.0104368	30	13.0207	1.04956	2.24004	1	0.083495	0.894043	11.9768	1.0365e-09	7.66651e-09	yes
ENSG00000109654	TRIM2	0.153659	0.320064	0.810541	0.728595	1.91025	3.72481	4.72965	9.09121	10.716	35.4047	16.285	24.5782	24.2844	22.4001	19.8437	15.0627	4.31827	1.03924	0.0361219	0.00326076	29.9999	27.4938	0.431118	0	1.01492	0.084744	0.894035	11.9763	1.03716e-09	7.66651e-09	yes
ENSG00000188647	PTAR1	0.307318	0.533441	0.385972	1.04085	2.01838	2.98904	9.28015	12.0176	7.30242	21.9629	15.9772	22.9567	12.556	13.8069	10.2802	2.92506	0.6048	0.381176	0.0702844	0.00716307	29.8484	21.5065	0.164805	0	1.00072	0.0835771	0.893993	11.9736	1.04074e-09	7.68749e-09	yes
ENSG00000173681	BCLAF3	0.0921955	0.320064	0.0771944	0.242865	0.28834	0.873721	1.8632	2.26305	1.68517	6.0008	5.04171	7.36777	5.67504	6.39657	4.457	0.82011	0.024192	0	0.0104361	0.00506065	30	6.93547	0.145589	0	1.02844	0.0859085	0.893958	11.9714	1.04363e-09	7.70088e-09	yes
ENSG00000142396	ERVK3-1	0.614637	1.13801	1.81407	2.18579	6.09117	10.4846	26.5506	41.7103	36.4257	21.1828	30.3923	21.9895	25.4904	23.1242	21.6579	19.0266	6.22944	4.23249	0.159538	0.00360797	30	22.6403	0.927728	4.6155	1	0.0835345	0.893954	11.9711	1.04402e-09	7.70088e-09	yes
ENSG00000112062	MAPK14	0.983419	2.3827	3.70533	5.13486	7.96538	12.9679	25.404	24.3083	16.6357	66.3688	47.9791	49.128	42.9884	37.9691	36.3727	22.0063	2.98771	0.694028	0.126353	0.005496	0	57.2027	1.20413	1.36065	1	0.0835484	0.893922	11.9691	1.04669e-09	7.71507e-09	yes
ENSG00000198015	MRPL42	6.82247	5.01434	7.29487	8.53497	11.2813	21.5211	71.9122	169.143	153.74	189.385	154.21	206.895	160.438	197.642	179.176	131.136	97.6752	31.1054	0.449649	0.00188943	29.9608	185.179	0.0154786	9.97494	1.00793	0.0842636	0.893803	11.9616	1.05676e-09	7.77869e-09	yes
ENSG00000011028	MRC2	3.25757	3.27177	5.558	7.28595	12.8311	18.67	27.3747	36.9111	39.3207	24.0032	36.8779	26.285	26.0106	24.0414	24.6367	11.8096	12.0234	8.39306	0.176571	0.00468772	13.2156	22.1044	3.27263	8.28777	1.00299	0.0838506	0.893803	11.9616	1.05681e-09	7.77869e-09	yes
ENSG00000174276	ZNHIT2	0	0.533441	1.3509	2.32457	3.67633	5.10437	8.13357	7.02325	8.46908	6.36085	3.00609	5.66095	4.89472	4.87588	1.94854	0.874784	0.36288	0	0.0722242	0.0087482	5.35558	5.77506	0	0.284908	0.999999	0.0836049	0.893794	11.961	1.05757e-09	7.77887e-09	yes
ENSG00000139433	GLTP	0.33805	0.284502	0.656153	0.90207	1.47774	3.31094	6.84367	22.2403	31.8455	175.043	117.474	116.178	106.951	125.759	107.618	96.2262	39.1185	17.3075	0.0821537	0.00243118	30	140.456	0	0	1.03681	0.0867049	0.893744	11.9579	1.06182e-09	7.79499e-09	yes
ENSG00000167394	ZNF668	0	0.640129	0.69475	7.49412	18.3816	30.6262	38.2672	48.2263	41.7405	38.8852	39.1975	21.3352	44.9747	29.5449	8.1973	3.77251	1.59667	0.668856	0.432871	0.00952778	22.333	42.3743	0.32013	0.823422	1	0.0836287	0.89374	11.9576	1.06216e-09	7.79499e-09	yes
ENSG00000170522	ELOVL6	0.6761	0.853505	2.20004	3.08786	4.14488	5.51824	23.075	44.8318	52.7589	50.8868	45.6121	68.0452	45.5185	45.3312	44.6596	42.345	20.9382	9.58694	0.13643	0.00183405	30	54.6275	0.0941505	0	1.02147	0.0854248	0.893738	11.9575	1.0623e-09	7.79499e-09	yes
ENSG00000082269	FAM135A	0	1.17357	2.58601	3.36542	2.8834	4.27663	16.8404	13.5783	12.2715	44.1059	53.2102	47.3358	36.273	27.0346	18.8583	2.37832	1.99584	0.07192	0.11384	0.00865198	29.3642	52.7042	0.891097	0	1.00734	0.0842456	0.893733	11.9572	1.06275e-09	7.79499e-09	yes
ENSG00000125651	GTF2F1	0.583905	0.39119	0.347375	1.90823	2.45089	3.81678	10.1401	23.2938	28.648	55.2074	30.7237	38.2328	33.53	44.3898	38.9036	20.0654	8.4672	2.39134	0.0902658	0.00297661	30	44.9294	0	0	1.03917	0.0869122	0.893723	11.9566	1.06362e-09	7.79582e-09	yes
ENSG00000167595	PROSER3	0.122927	1.84926	0.96493	1.70006	5.0099	4.82846	4.69382	5.85271	5.09873	20.7628	8.35551	10.8099	5.95879	4.48967	1.54539	0.984132	0.653184	0.165416	0.133051	0.0306035	30	18.4113	0.978018	0.918693	0.999995	0.0836395	0.893714	11.956	1.06436e-09	7.79582e-09	yes
ENSG00000106052	TAX1BP1	15.9498	24.3605	20.8811	26.1253	38.5294	53.6648	104.339	169.26	190.209	287.318	309.675	375.017	273.844	310.535	285.405	301.117	156.837	91.2701	0.423329	0.00139751	0	331.298	10	0	0.99647	0.0834054	0.893576	11.9473	1.07627e-09	7.87755e-09	yes
ENSG00000165782	PIP4P1	3.13465	5.01434	3.24217	8.3268	11.6778	25.2459	41.2411	60.0878	65.765	29.5239	56.3819	42.0162	44.5491	47.0691	26.4733	3.93653	1.31846	1.35929	0.305643	0.00482711	29.5132	48.4456	3.36921	0	1.03039	0.0862875	0.893482	11.9414	1.08444e-09	7.92926e-09	yes
ENSG00000171612	SLC25A33	0.0921955	0.39119	0.849139	0.589815	2.01838	2.43722	7.41696	12.2517	12.2715	40.3254	19.0307	28.3332	22.2509	23.2932	24.4351	8.52914	1.65715	0.859444	0.0596097	0.00468804	30	31.4991	0.00638299	0	1.01091	0.0846583	0.893477	11.9411	1.08489e-09	7.92926e-09	yes
ENSG00000013374	NUB1	1.47513	1.49363	2.66321	2.15109	3.53216	5.0124	20.531	31.0194	27.827	100.453	100.716	108.355	88.909	99.3037	99.5323	93.6292	39.2152	17.2608	0.0804541	0.00176628	26.787	108.688	1.0806	0	1.00983	0.0845717	0.893468	11.9406	1.08561e-09	7.92926e-09	yes
ENSG00000179820	MYADM	3.56489	8.53505	13.5862	23.1763	22.6347	45.2495	55.3226	81.7819	81.9254	2761.33	1365.1	1293.66	1367.02	1293.12	1020.05	445.812	38.3685	5.58099	0.689012	0.00865654	29.5942	2116.36	0.133678	10	0.8986	0.0753505	0.89323	11.9256	1.1066e-09	8.07304e-09	yes
ENSG00000173638	SLC19A1	0.583905	0.213376	0	1.14494	1.04523	4.13868	12.7916	26.5323	32.4072	70.0893	81.8272	46.7669	57.2233	48.8794	52.4314	49.644	19.4746	10.45	0.0894629	0.00223902	30	66.731	0	0	1.02912	0.086296	0.893227	11.9254	1.10684e-09	8.07304e-09	yes
ENSG00000157654	PALM2-AKAP2	0.983419	3.98302	4.24569	5.34303	8.90248	17.2905	69.1533	78.9726	68.9193	96.3128	61.8497	89.7218	54.8824	60.4174	68.4676	30.2894	6.27782	1.65056	0.382235	0.00465187	30	85.3163	1.25789	0.905015	1	0.0838732	0.893184	11.9228	1.11063e-09	8.09508e-09	yes
ENSG00000166965	RCCD1	1.04488	1.42251	2.04565	2.39396	5.80283	12.8299	39.6646	48.0703	49.6046	63.0084	94.7037	66.9927	86.6862	76.1554	76.2394	50.9835	14.358	4.6748	0.168251	0.00268769	29.5593	85.7228	2.4031	0	1.03357	0.0866988	0.893163	11.9214	1.11253e-09	8.10322e-09	yes
ENSG00000168591	TMUB2	5.07075	5.51222	5.28782	7.28595	7.1364	28.4189	63.4562	101.369	118.178	225.39	354.932	172.247	254.667	190.883	203.611	86.6583	24.4218	9.41433	0.488242	0.00410687	30	273.848	0.202798	0	1.01231	0.0849346	0.893119	11.9187	1.11646e-09	8.12621e-09	yes
ENSG00000197860	SGTB	0.0307318	0.142251	0.0771944	0.312255	0.576679	1.14963	2.00652	2.34108	2.98146	9.7213	5.84649	3.38519	6.12431	6.39657	3.7403	0.656088	0.229824	0.338024	0.0203081	0.00785775	28.6138	7.77826	0.0235411	0.0966855	1	0.083947	0.893017	11.9123	1.12562e-09	8.18717e-09	yes
ENSG00000229809	ZNF688	0.0614637	0.177814	0.96493	1.17963	1.36961	1.47153	2.86646	4.25297	3.75924	5.88078	5.96484	7.16864	5.62775	5.35864	3.78509	4.10055	2.58854	0.37758	0.0113012	0.00251111	30	6.38934	0.678277	0	1.00032	0.084002	0.892951	11.9082	1.13152e-09	8.21466e-09	yes
ENSG00000153406	NMRAL1	0.645368	0.995756	1.11932	4.37157	8.07351	11.4963	27.2672	93.2922	126.82	287.498	260.938	230.534	304.253	335.494	244.665	213.42	90.7684	51.7285	0.310459	0.00207993	29.9793	291.251	0.0162669	9.99284	1.05462	0.0885632	0.892949	11.9081	1.13171e-09	8.21466e-09	yes
ENSG00000106346	USP42	0.276586	1.56476	1.62108	3.33072	5.83888	9.84085	14.189	19.353	29.3393	80.8308	51.2456	45.885	38.2592	43.0139	9.89947	3.08908	0.677376	0.460288	0.271449	0.0135555	30	73.8778	0.222392	0	1.00105	0.0840651	0.892949	11.9081	1.13176e-09	8.21466e-09	yes
ENSG00000111358	GTF2H3	3.01172	2.52495	2.39303	1.56128	2.30672	5.84013	13.759	16.8168	13.1357	221.129	138.043	152.703	128.871	144.538	137.652	79.414	14.1765	8.29957	0.0597004	0.00390186	29.542	180.998	2.07326	0	1.01026	0.0848743	0.892867	11.903	1.13915e-09	8.26256e-09	yes
ENSG00000008282	SYPL1	1.22927	1.92039	2.7404	4.75322	5.44241	12.37	34.29	67.8915	61.1848	74.2299	103.935	102.58	94.4421	80.0899	87.5275	74.22	38.1508	15.5779	0.192005	0.0021942	30	88.7237	1.37754	9.96021	1.02456	0.086086	0.892845	11.9016	1.14119e-09	8.27165e-09	yes
ENSG00000085274	MYNN	0.245855	0.142251	2.00705	4.44096	7.53287	11.8642	21.4268	27.1176	21.3455	35.5847	28.1436	46.8522	37.1715	20.2035	14.6476	4.75664	3.3143	0.7192	0.177919	0.00715587	17.6666	39.8475	0.194063	0.359714	1	0.0840447	0.892794	11.8984	1.14584e-09	8.29611e-09	yes
ENSG00000196712	NF1	1.10635	3.48515	7.60365	9.95747	10.5965	14.2554	23.1108	21.1868	17.7159	57.4877	24.3801	25.6307	19.8153	17.1138	11.6688	8.06441	3.53203	1.49953	0.50988	0.0308723	22.3614	46.1127	2.29576	6.21167	1	0.0840462	0.89279	11.8982	1.14615e-09	8.29611e-09	yes
ENSG00000105711	SCN1B	0.184391	0.355627	1.04212	2.42865	3.64029	5.47225	9.78178	11.8615	11.9691	111.675	56.9263	41.874	38.0937	30.7277	20.0901	8.77518	3.70138	1.04644	0.299887	0.0314891	30	96.5798	0	8.69837	1.00299	0.0843373	0.892701	11.8926	1.15438e-09	8.34988e-09	yes
[truncated: 9,007 more rows]

## Sheet: Table S2
Table S2: Results of Gene Set Enrichment Analysis (GSEA) for RNA synthesis rates
[truncated: 45 more rows]

## Sheet: Table S3
Table S3: Results of Gene Set Enrichment Analysis (GSEA) for RNA degradation rates
[truncated: 45 more rows]

[truncated: 2 more sheets: Table S4, Table S5]
